# Supplementary material for: Interconnections Between RNA-Processing Pathways Revealed by a Sequencing-Based Genetic Screen for Pre-mRNA Splicing Mutants in Fission Yeast
Source: Oxford University Press journal article supplement (doi:10.1534/g3.116.027508), 2016-06-01
Supplement: 027508_figures1.pdf [file 027508_figures1.pdf]

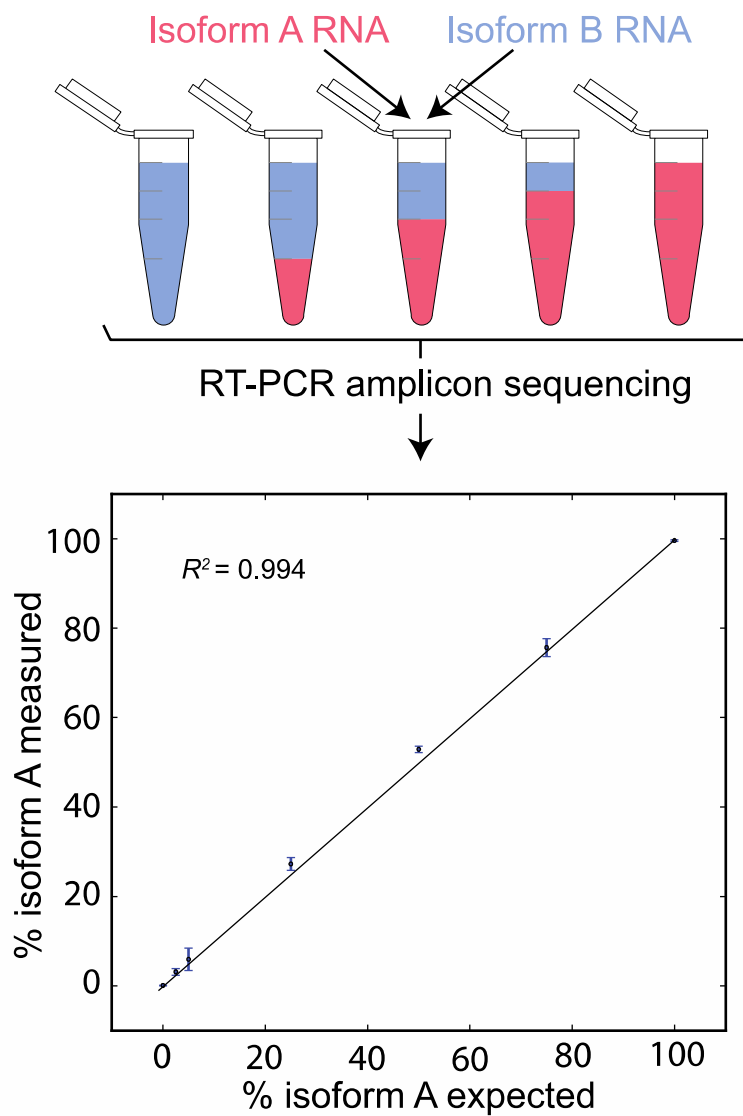

**Figure S1: RT-PCR amplicon sequencing accurately and precisely measures splicing efficiency in complex mixtures containing known abundances of different spliced isoforms**

Total cellular RNA was collected from two strains, each carrying a different splice isoform of the *pwil* gene ORF in place of the native *pwil* gene. Isoforms A and B differed by a length of 90 nucleotides. RNA from each strain was mixed in different proportions, and the relative abundance of each isoform was measured in each mixture by RT-PCR amplicon sequencing. Errorbars represent the standard deviation between three technical replicate RT-PCR reactions.
