# Supplementary material for: Interconnections Between RNA-Processing Pathways Revealed by a Sequencing-Based Genetic Screen for Pre-mRNA Splicing Mutants in Fission Yeast
Source: Oxford University Press journal article supplement (doi:10.1534/g3.116.027508), 2016-06-01
Supplement: 027508_figures2.pdf [file 027508_figures2.pdf]

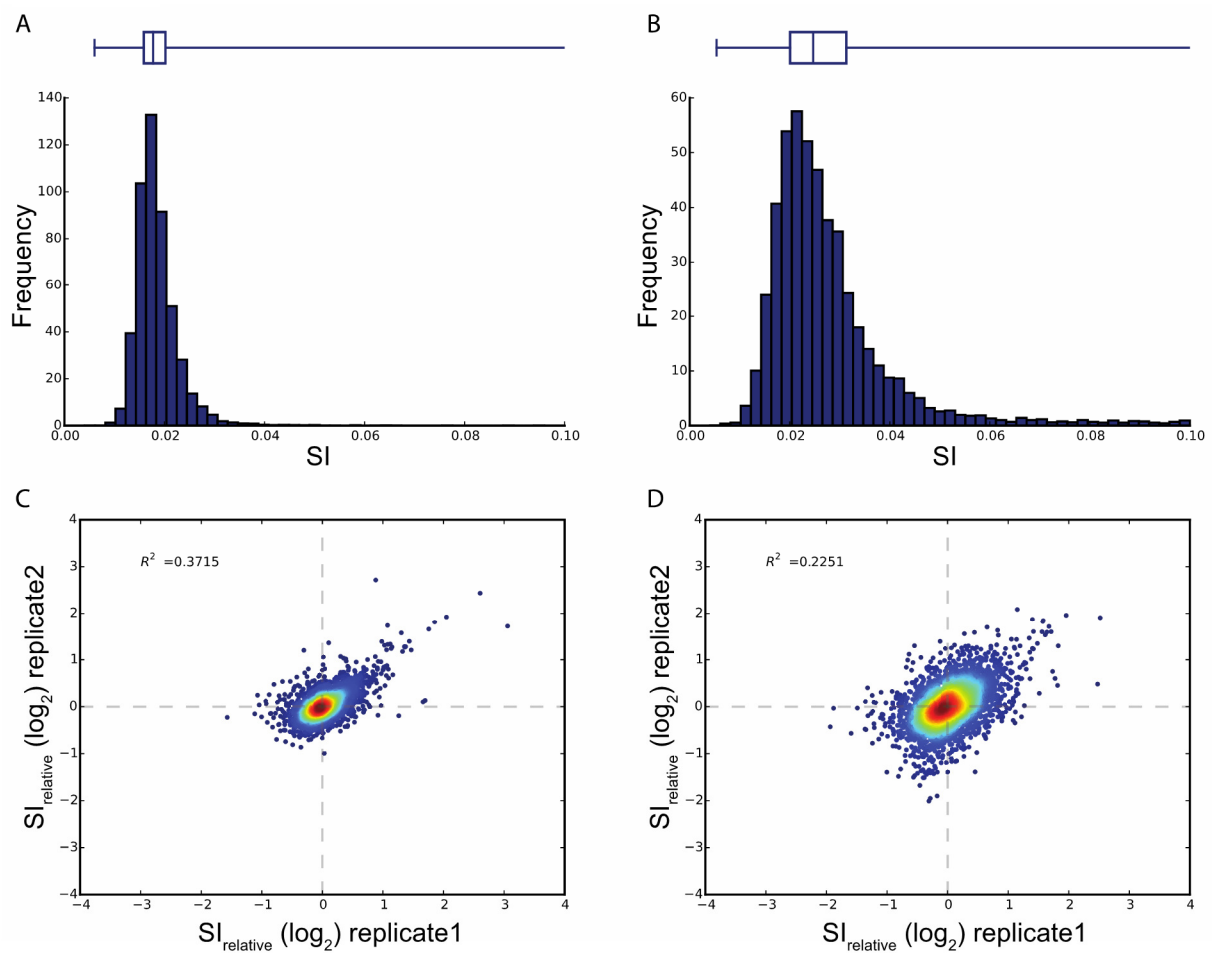

**Figure S2: Splice index measurements for *fet5\_intron1* and *pwil\_intron2* are reproducible**

Histograms and box-whisker plots of the measured splice index for *fet5\_intron1* (A) and *pwil\_intron2* (B) reveal that relatively consistent splice index measurements are generated for nearly all samples. The splice index relative to the median was calculated for each biological replicate for each deletion strain and replicate scatter plots (C, D) show that the relative splice index measurements are largely reproducible among the ~3000 strains in the collection.
