# Supplementary material for: Interconnections Between RNA-Processing Pathways Revealed by a Sequencing-Based Genetic Screen for Pre-mRNA Splicing Mutants in Fission Yeast
Source: Oxford University Press journal article supplement (doi:10.1534/g3.116.027508), 2016-06-01
Supplement: 027508_figures3.pdf [file 027508_figures3.pdf]

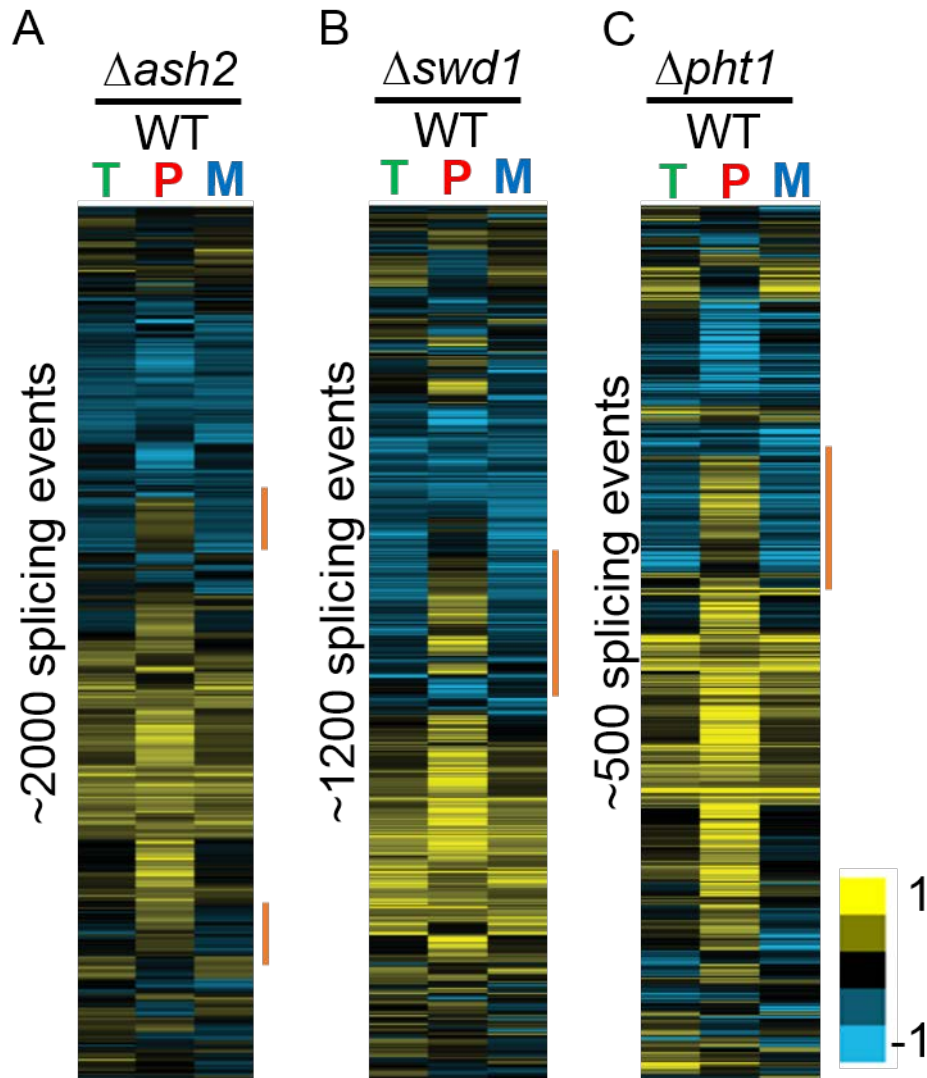

**Figure S3: Heterochromatin factors show splicing defects for a subset of splicing events.**

Splicing sensitive microarrays for the heterochromatin factors *ash2* (A), *swd1* (B), and *pht1* (C).

Each heatmap was independently organized using hierarchical clustering. The orange bar(s) in each panel indicate specific subsets of splicing events displaying canonical splicing defect phenotypes.
