# Supplementary material for: Interconnections Between RNA-Processing Pathways Revealed by a Sequencing-Based Genetic Screen for Pre-mRNA Splicing Mutants in Fission Yeast
Source: Oxford University Press journal article supplement (doi:10.1534/g3.116.027508), 2016-06-01
Supplement: 027508_figures4.pdf [file 027508_figures4.pdf]

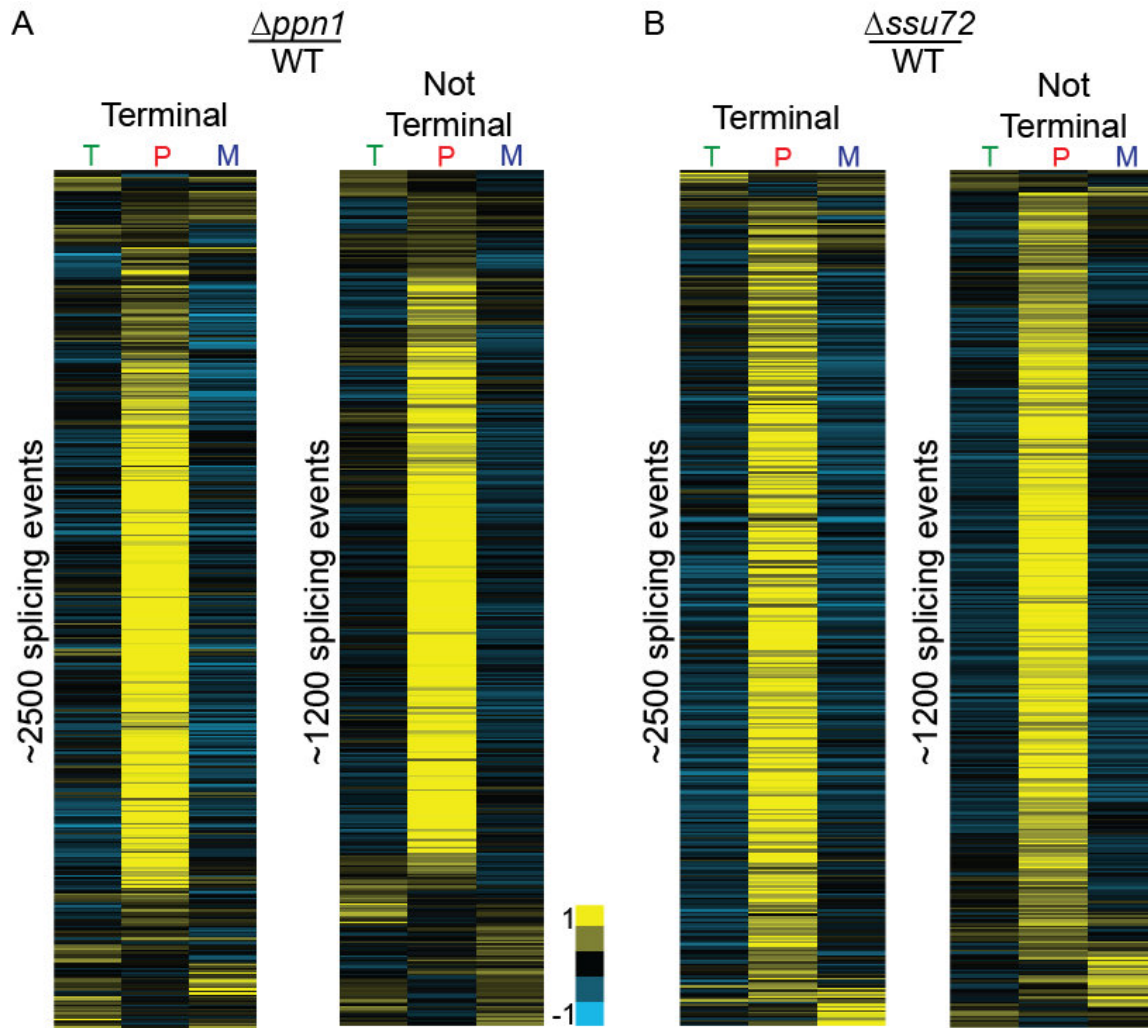

**Figure S4: 3' end processing factors affect the splicing of both terminal and not terminal introns.**

Splicing sensitive microarrays of 3' end processing factors *ppn1* (A) and *ssu72* (B). Only transcripts that contained multiple introns were considered for this analysis. Introns were called 'terminal' when they were the last intron annotated within a transcript, the remainder were considered 'not terminal'. Each heatmap was organized by hierarchical clustering. Global splicing defects are observed for each of the mutants, regardless of relative intron location.
