# Supplementary material for: Interconnections Between RNA-Processing Pathways Revealed by a Sequencing-Based Genetic Screen for Pre-mRNA Splicing Mutants in Fission Yeast
Source: Oxford University Press journal article supplement (doi:10.1534/g3.116.027508), 2016-06-01
Supplement: 027508_tables4.pdf [file 027508_tables4.pdf]

| Candidate       | <i>S. cerevisiae</i> homolog(s) | <i>H. sapiens</i> homolog |
|-----------------|---------------------------------|---------------------------|
| <i>ash2</i>     | <i>BRE2</i>                     | ASH2L                     |
| ** <i>cay1</i>  | --                              | CACTIN                    |
| * <i>csx2</i>   | --                              | ACAP1                     |
| * <i>ctr1</i>   | --                              | CCDC174                   |
| ** <i>cwf18</i> | --                              | CCDC12                    |
| ** <i>cwf19</i> | --                              | CWF19L2/L1                |
| <i>est1</i>     | <i>EST1</i>                     | SMG6                      |
| <i>hba2</i>     | <i>PDR5/10/12/15/18</i>         | --                        |
| * <i>hri2</i>   | --                              | EIF2AK2/3                 |
| <i>ies2</i>     | <i>IES2</i>                     | INO80B                    |
| <i>imp1</i>     | <i>SRP1</i>                     | KPNA1/5/6                 |
| <i>lem2</i>     | <i>LEMD2</i>                    | SRC1, HEH2                |
| <i>lsg1</i>     | <i>CTK3</i>                     | --                        |
| <i>med20</i>    | <i>SRB2</i>                     | MED20                     |
| <i>meu17</i>    | <i>SGA1</i>                     | --                        |
| <i>mug154</i>   | <i>NUR1</i>                     | --                        |
| <i>mug42</i>    | --                              | --                        |
| <i>mug78</i>    | <i>ATG13</i>                    | ATG13                     |
| <i>mug80</i>    | <i>CLG1</i>                     | --                        |
| <i>not3</i>     | <i>NOT3/5</i>                   | CNOT3                     |
| <i>nup170</i>   | <i>NUP157, NUP170</i>           | NUP155                    |
| * <i>nup37</i>  | --                              | NUP37                     |
| <i>nxt3</i>     | <i>BRE5</i>                     | G3BP1                     |
| <i>oma4</i>     | <i>PMT4</i>                     | POMT1                     |
| <i>pds5</i>     | <i>PDS5</i>                     | PDS5B                     |
| <i>pht1</i>     | <i>HTZ1</i>                     | H2AFZ, H2AFV              |
| <i>png2</i>     | <i>YNG1/2, PHO23</i>            | ING2/3/4/5                |
| <i>pof4</i>     | <i>EKA1</i>                     | TCEB3, TCEB3B             |
| <i>ppk29</i>    | <i>PRK1, ARK1, AKL1</i>         | BMP2K, AAK1               |
| ** <i>ppn1</i>  | --                              | PPP1R10                   |
| <i>prx</i>      | --                              | --                        |
| ** <i>pwi1</i>  | --                              | SRRM1                     |
| * <i>red1</i>   | --                              | ZFC3H1                    |
| <i>rhp51</i>    | <i>RAD51</i>                    | RAD51                     |
| <i>rnh201</i>   | <i>RNH201</i>                   | RNASEH2A                  |
| <i>rpb9</i>     | <i>RPB9</i>                     | POLR21                    |
| <i>rpl2102</i>  | <i>RPL21A,B</i>                 | RPL21                     |
| <i>rpl4301</i>  | <i>RPL43A,B</i>                 | RPL37A                    |

|    | Screen Hit    | <i>S. cerevisiae</i> homolog(s) | <i>H. sapiens</i> homolog |
|----|---------------|---------------------------------|---------------------------|
| *  | <i>rtf2</i>   | --                              | RTFDC1                    |
| *  | <i>rtt109</i> | --                              | RTT109                    |
| *  | <i>sdu1</i>   | --                              | DES2                      |
|    | <i>smd3</i>   | SMD3                            | SNRPD3                    |
|    | SPAC18G6.13   | --                              | --                        |
| ** | SPAC20H4.06c  | --                              | GPATCH1                   |
|    | SPAC22H10.11c | IFH1, CRF1                      | --                        |
|    | SPBC1348.03   | --                              | --                        |
|    | SPBC28F2.08c  | HRD3                            | SEL1L, SEL1L2, SEL1L3     |
| *  | SPBC713.05    | --                              | WRD83                     |
|    | SPCC18.13     | TRM82                           | WDR4                      |
|    | SPCC550.03c   | SKI2                            | SKIV2L                    |
|    | SPCC736.07c   | BUD27                           | URI1                      |
| *  | <i>sdj1</i>   | --                              | PARK7                     |
| *  | <i>spf31</i>  | --                              | DNAJC8                    |
|    | <i>ssu72</i>  | SSU72                           | SSU72                     |
|    | <i>swc2</i>   | VPS72                           | VPS72                     |
|    | <i>swi3</i>   | Csm3                            | TIPIN                     |
|    | <i>toc1</i>   | --                              | --                        |
|    | <i>trs130</i> | TRS130                          | TRAPPC10                  |
|    | <i>ubr1</i>   | UBR1, UBR2                      | UBR1, UBR2                |
|    | <i>vps71</i>  | VPS71                           | ZNHIT1                    |
|    | <i>yaf9</i>   | YAF9                            | MLLT3, YEATS4             |

**Table S4: Many candidates identified in our screen have no apparent *S. cerevisiae* homolog but have an apparent homolog in humans.**

Listed here are the 61 candidates identified in our screen with their corresponding homolog(s) in *S. cerevisiae* and in humans. The red asterisks indicate the 17 genes that have no homolog in *S. cerevisiae* but do in humans. Of those 17 genes, the green asterisks indicate those genes that are known splicing factors. The blue asterisks indicate those genes that were predicted to be involved in splicing based on homology and have now been confirmed in this study.
