# Supplementary material for: Interconnections Between RNA-Processing Pathways Revealed by a Sequencing-Based Genetic Screen for Pre-mRNA Splicing Mutants in Fission Yeast
Source: G3 (Bethesda). 2016 Mar 25;6(6):1513–23. doi: 10.1534/g3.116.027508 (PMC4889648; doi:10.1534/g3.116.027508)
Supplement: Supplemental Material [file supp_g3.116.027508_TableS1.xlsx]

## Sheet: TableS1
TableS1: Read counts for spliced and unspliced isoforms and Splice Indices for both fet5_intron1 and pwi1_intron2 are shown for each of the strains examined
			fet5_intron1												pwi1_intron2
			Replicate1				Replicate2				ReplicatesCombined				Replicate1				Replicate2				ReplicatesCombined
Plate and Well Position	Gene Deletion Strain	Common Name	SplicedReads	UnsplicedReads	SI	SI_relative (log2)	SplicedReads	UnsplicedReads	SI	SI_relative (log2)	ReadCount	SI_relative (log2)	P-value	Corrected P-value	SplicedReads	UnsplicedReads	SI	SI_relative (log2)	SplicedReads	UnsplicedReads	SI	SI_relative (log2)	ReadCount	SI_relative (log2)	P-value	Corrected P-value
001_A02	SPAC589.11	pth4	10707	204	0.019053	0.134826	7988	119	0.0148973	-0.109729	19018	0.0357775	0.799271	1.034	12321	400	0.0324649	0.386505	7553	178	0.0235668	0.264704	20452	0.373986	0.162222	0.947448
001_A03	SPAC17A5.18C	rec25	24992	434	0.0173656	0.00104014	10453	176	0.0168373	0.0668739	36055	0.0301229	0.592854	1.06242	30527	863	0.0282701	0.186899	10209	252	0.0246841	0.33153	41851	0.286467	0.152636	0.929395
001_A05	SPAC27E2.01	SPAC27E2.01	5617	143	0.0254584	0.552955	3069	60	0.0195503	0.282409	8889	0.471612	0.117855	0.868495	5647	226	0.0400213	0.688391	2797	67	0.0239542	0.288229	8737	0.628701	0.104249	0.832931
001_A06	SPAC8C9.19	SPAC8C9.19	4135	86	0.0207981	0.261261	6184	119	0.0192432	0.259565	10524	0.237217	0.44218	1.06624	5503	121	0.021988	-0.175659	5401	146	0.027032	0.462618	11171	0.125781	0.700394	1.02503
001_A07	SPAC4G9.19	SPAC4G9.19	25792	450	0.0174473	0.00781281	11042	200	0.0181127	0.172214	37484	0.0662975	0.462094	1.05688	22874	642	0.0280668	0.176489	10736	180	0.016766	-0.226512	34432	0.124047	0.383604	1.01307
001_A08	SPAPB17E12.03	SPAPB17E12.03	8227	174	0.0211499	0.28546	7342	147	0.0200218	0.316787	15890	0.290793	0.205983	1.00258	12597	280	0.0222275	-0.160029	5874	118	0.0200885	0.0343197	18869	-0.0586944	0.920788	1.00928
001_A11	SPBC365.06	pmt3	40485	675	0.0166728	-0.0576885	15574	274	0.0175934	0.130252	57008	0.00635791	0.565863	1.06234	44481	1213	0.0272701	0.134943	22685	438	0.0193079	-0.0228597	68817	0.131336	0.301408	1.01588
001_A12	SPBC146.10	mug57	28419	564	0.0198459	0.193651	19299	347	0.0179802	0.161625	48629	0.179813	0.14723	0.923188	42155	1144	0.0271379	0.127936	21275	500	0.0235018	0.260717	65074	0.207772	0.20347	0.974923
001_A13	SPCC613.12C	raf1	28453	524	0.0184163	0.0857975	11445	208	0.0181739	0.177082	40630	0.122423	0.28864	1.04042	22998	508	0.0220889	-0.169055	10240	265	0.0258789	0.399725	34011	0.051434	0.51806	1.03612
001_A14	SPBC1685.10	rps27	14941	282	0.0188742	0.12123	12091	210	0.0173683	0.111671	27524	0.110886	0.424616	1.06712	12706	298	0.0234535	-0.082573	13938	284	0.020376	0.0548154	27226	-0.0389924	0.76518	1.02067
001_A15	SPAC13G7.11	SPAC13G7.11	63586	1223	0.0192338	0.148455	12961	252	0.0194429	0.274462	78022	0.193193	0.0887358	0.797358	45954	952	0.0207164	-0.261604	13367	258	0.0193013	-0.0233566	60531	-0.137809	0.861644	1.01098
001_A18	SPBC23G7.15C	rpp202	27971	555	0.019842	0.193367	13751	264	0.0191986	0.256217	42541	0.219951	0.111755	0.859695	19772	479	0.0242262	-0.0358086	14650	283	0.0193174	-0.0221506	35184	-0.0197408	0.660024	1.02605
001_A19	SPAC1D4.11C	lkh1	28915	14	0.000484178	-5.16351	18857	344	0.0182426	0.182524	48130	--	--	0.158655	52008	1462	0.0281111	0.178762	25443	507	0.0199269	0.022665	79420	0.179906	0.23384	0.988091
001_A21	SPAC23C4.17	trm402	24554	223	0.00908202	-0.934103	36829	641	0.0174048	0.114698	62247	-0.259912	0.379919	1.05667	36701	1332	0.0362933	0.547327	43676	846	0.0193699	-0.018235	82555	0.271948	0.137796	0.905596
001_A22	SPBC3D6.09	dpb4	17894	11	0.000614731	-4.81909	10667	228	0.0213743	0.411095	28800	--	--	0.158655	44204	1445	0.0326893	0.396445	15084	425	0.0281756	0.522392	61158	0.491025	0.0308725	0.552196
001_A23	SPAC2F3.12C	plp1	22867	475	0.0207723	0.259472	18899	322	0.0170379	0.0839663	42563	0.179147	0.168052	0.967218	26907	805	0.0299179	0.268632	26763	517	0.0193177	-0.0221275	54992	0.134334	0.308055	1.01333
001_A24	SPBCPT2R1.02	SPBCPT2R1.02	14946	358	0.0239529	0.465012	11221	236	0.021032	0.387801	26761	0.42961	0.0211233	0.444152	21933	921	0.0419915	0.757723	14347	420	0.0292744	0.577588	37621	0.719862	0.00644621	0.270569
001_B01	SPBP8B7.26	SPBP8B7.26	6235	153	0.0245389	0.499882	7804	143	0.0183239	0.188945	14335	0.323053	0.184244	0.976647	7655	353	0.0461137	0.892818	8044	182	0.0226256	0.205902	16234	0.602665	0.0532663	0.684417
001_B03	SPCC1183.10	wtf10	6216	122	0.0196268	0.177634	10136	155	0.015292	-0.0720047	16629	0.0073147	0.949281	1.01287	9492	251	0.0264433	0.0905279	10402	187	0.0179773	-0.125875	20332	-0.0276034	0.825376	1.01814
001_B04	SPBP23A10.10	ppk32	11327	177	0.0156264	-0.151205	16806	248	0.0147566	-0.123421	28558	-0.157905	0.630199	1.0567	11422	300	0.0262651	0.0807718	15234	284	0.0186425	-0.0734558	27240	-0.0346928	0.755243	1.01864
001_B06	SPCC1450.07C	dao1	3075	68	0.0221138	0.34976	2674	88	0.0329095	1.03372	5905	0.687059	0.0427933	0.599867	4733	151	0.0319037	0.361346	3215	101	0.0314152	0.679413	8200	0.498559	0.216475	0.984775
001_B07	SPAC1002.14	itt1	20046	285	0.0142173	-0.287541	10400	142	0.0136538	-0.235477	30873	-0.265121	0.324933	1.04897	11229	284	0.0252917	0.026286	10370	210	0.0202507	0.0459215	22093	0.0273457	0.677557	1.02546
001_B09	SPAC17C9.11C	SPAC17C9.11C	6200	12	0.00193548	-3.16442	3960	79	0.0199495	0.311568	10251	--	--	0.158655	10522	324	0.0307926	0.310209	3498	91	0.0260149	0.407284	14435	0.399424	0.198544	0.978115
001_B10	SPCC777.04	SPCC777.04	13111	14	0.00106781	-4.02247	20830	352	0.0168987	0.0721281	34307	--	--	0.158655	28960	607	0.0209599	-0.244741	20619	388	0.0188176	-0.0599697	50574	-0.161233	0.934538	1.00476
001_B11	SPAC23H4.02	ppk9	32271	560	0.017353	0	18047	315	0.0174544	0.118808	51193	0.0451043	0.452609	1.06136	44656	936	0.0209602	-0.244721	21519	376	0.0174729	-0.16693	67487	-0.178791	0.960937	1.00266
001_B12	SPBC36.10	SPBC36.10	14452	255	0.0176446	0.0240395	12200	167	0.0136885	-0.231817	27074	-0.090105	0.862515	1.02308	23729	436	0.0183741	-0.434699	18954	363	0.0191516	-0.0345847	43482	-0.261667	0.799762	1.01971
001_B13	SPAC29B12.11C	SPAC29B12.11C	2677	56	0.0209189	0.269621	1433	35	0.0244243	0.603532	4201	0.393624	0.419197	1.06282	1872	40	0.0213675	-0.216956	900	15	0.0166667	-0.235086	2827	-0.177696	0.35542	1.00346
001_B14	SPAC13G6.15C	SPAC13G6.15C	9163	138	0.0150606	-0.204412	32983	592	0.0179486	0.15909	42876	0.0393966	0.512584	1.06082	12638	257	0.0203355	-0.288375	21134	363	0.0171761	-0.191648	34392	-0.28976	0.697406	1.02542
001_B15	SPAC6B12.02C	mus7	35818	651	0.0181752	0.0667842	10264	183	0.0178293	0.149466	46916	0.10274	0.305655	1.05015	24064	664	0.0275931	0.151931	9866	245	0.0248328	0.340193	34839	0.255518	0.202062	0.975599
001_B16	SPAC1071.02	mms19	14704	305	0.0207427	0.257412	14204	276	0.0194311	0.273587	29489	0.253965	0.125384	0.880757	14136	428	0.0302773	0.285861	15289	338	0.0221074	0.172477	30191	0.214101	0.272533	1.02014
001_B17	SPAPB2B4.04C	SPAPB2B4.04C	15310	277	0.0180927	0.0602232	21932	369	0.0168247	0.065799	37888	0.0414994	0.53922	1.06161	17145	375	0.0218723	-0.183273	25860	413	0.0159706	-0.296632	43793	-0.29251	0.727962	1.02122
001_B18	SPAC11D3.17	SPAC11D3.17	23826	487	0.0204399	0.236196	18946	384	0.0202681	0.334429	43643	0.272902	0.0599467	0.708134	17449	384	0.022007	-0.174414	18847	361	0.0191542	-0.034388	37041	-0.128771	0.903815	1.01361
001_B21	SPBC26H8.05C	pph3	14608	10	0.000684556	-4.66388	16283	238	0.0146165	-0.137189	31139	--	--	0.158655	32113	731	0.0227634	-0.125661	23070	356	0.0154313	-0.346193	56270	-0.188145	0.991927	1.00179
001_B23	SPBC30D10.14	SPBC30D10.14	16616	375	0.0225686	0.379129	21494	418	0.0194473	0.274784	38903	0.304047	0.048935	0.64042	21396	573	0.0267807	0.108819	27762	728	0.0262229	0.418775	50459	0.237922	0.184357	0.980329
001_B24	SPAC15A10.06	SPAC15A10.06	16794	319	0.0189949	0.130422	20739	363	0.0175033	0.122839	38215	0.108508	0.337258	1.04593	20952	576	0.0274914	0.146605	27008	608	0.0225118	0.198633	49144	0.137565	0.312977	1.01259
001_C01	SPAC11E3.10	SPAC11E3.10	1497	38	0.0253841	0.548737	1083	22	0.0203139	0.337686	2640	0.464487	0.416216	1.06468	1366	49	0.0358712	0.530449	927	22	0.0237325	0.27481	2364	0.464382	0.590083	1.03775
001_C02	SPAC5D6.01	rps2202	11200	241	0.0215179	0.310346	3732	66	0.0176849	0.137733	15239	0.286727	0.223423	1.00524	11038	406	0.036782	0.566625	4280	143	0.0334112	0.768281	15867	0.675377	0.0334034	0.55637
001_C04	SPAC6B12.06C	rrg9	16378	261	0.015936	-0.122898	4518	67	0.0148296	-0.116308	21224	-0.102635	0.746554	1.0479	21781	575	0.0263992	0.0881163	6038	142	0.0235177	0.261696	28536	0.199702	0.302127	1.01288
001_C05	SPAC27F1.10	SPAC27F1.10	29272	484	0.0165346	-0.0697028	13751	241	0.017526	0.124712	43748	-0.000231303	0.648546	1.05168	27885	679	0.02435	-0.0284531	14233	251	0.0176351	-0.153604	43048	-0.0234071	0.6306	1.01906
001_C06	SPAC8E11.04C	SPAC8E11.04C	9174	141	0.0153695	-0.175116	7635	138	0.0180747	0.169184	17088	-0.0220729	0.958389	1.00961	7212	161	0.0223239	-0.153786	6371	123	0.0193062	-0.0229854	13867	-0.102112	0.877506	1.01038
001_C07	SPAC513.06C	SPAC513.06C	20280	389	0.0191815	0.144524	30317	419	0.0138206	-0.217961	51405	-0.0778007	0.926097	1.01597	35435	932	0.0263017	0.0827795	27030	476	0.0176101	-0.155652	63873	0.00632652	0.526735	1.03506
001_C08	SPAPB17E12.04C	csn2	10757	194	0.0180348	0.0555923	3551	62	0.0174599	0.119258	14564	0.0862176	0.736775	1.05196	9272	226	0.0243745	-0.0270052	4940	91	0.0184211	-0.0906964	14529	-0.0088276	0.896256	1.01453
001_C09	SPBC106.05C	tim11	35551	589	0.0165677	-0.0668111	10686	154	0.0144114	-0.157576	46980	-0.0687898	0.906115	1.01524	28292	752	0.02658	0.097963	8426	176	0.0208877	0.0906037	37646	0.171436	0.296252	1.0137
001_C10	SPAPB2B4.06	SPAPB2B4.06	3616	66	0.0182522	0.0728828	3831	61	0.0159227	-0.0136962	7574	0.0169931	0.813173	1.03168	2700	95	0.0351852	0.502593	2527	38	0.0150376	-0.383478	5360	0.18117	0.855034	1.01533
001_C11	SPBC3D6.05	ptp4	13566	238	0.0175439	0.0157776	31585	479	0.0151654	-0.0839984	45868	-0.085889	0.98305	1.00341	8892	153	0.0172065	-0.529424	20554	360	0.0175148	-0.163474	29959	-0.365314	0.514298	1.03584
001_C12	SPBC14C8.04	SPBC14C8.04	23703	385	0.0162427	-0.0953998	17147	250	0.0145798	-0.140813	41485	-0.116684	0.86783	1.02208	14887	365	0.024518	-0.018532	12242	273	0.0223003	0.18501	27767	0.0675197	0.532095	1.04234
001_C13	SPCC757.12	SPCC757.12	11095	190	0.0171248	-0.0190988	691	16	0.0231548	0.52653	11992	0.052466	0.92193	1.01387	10530	258	0.0245014	-0.0195098	583	20	0.0343053	0.80638	11391	0.156636	0.631284	1.01912
001_C16	SPBC18E5.14C	SPBC18E5.14C	29703	457	0.0153857	-0.173603	9965	158	0.0158555	-0.0198016	40283	-0.120493	0.846145	1.02762	25521	727	0.0284863	0.197895	11816	293	0.0247969	0.338107	38357	0.28369	0.163153	0.945869
001_C18	SPBC23G7.16	ctr6	747	8	0.0107095	-0.696297	3578	64	0.0178871	0.154134	4397	-0.0178074	0.601043	1.0638	4371	127	0.0290551	0.226418	2531	48	0.0189648	-0.048725	7077	0.176068	0.765339	1.02045
001_C19	SPAC1F8.08	SPAC1F8.08	23394	419	0.0179106	0.0456231	21614	293	0.013556	-0.24585	45720	-0.0914084	0.993084	1.00166	16502	414	0.0250879	0.0146144	23390	417	0.0178281	-0.137896	40723	-0.107452	0.834401	1.0181
001_C20	SPBC30D10.09C	SPBC30D10.09C	31628	510	0.016125	-0.105894	12570	193	0.015354	-0.0661683	44901	-0.0835606	0.977883	1.00333	23585	505	0.0214119	-0.213962	15586	309	0.0198255	0.0153042	39985	-0.110958	0.846124	1.01858
001_C21	SPAC25B8.10	SPAC25B8.10	25108	398	0.0158515	-0.130567	12680	194	0.0152997	-0.0712825	38380	-0.105435	0.896053	1.01917	19878	611	0.0307375	0.307624	15318	237	0.015472	-0.342393	36044	0.102452	0.412204	1.03478
001_C22	SPBC4B4.06	vps25	10801	243	0.0224979	0.374603	11625	214	0.0184086	0.195596	22883	0.273918	0.146815	0.924262	13960	345	0.0247135	-0.00707803	19549	451	0.0230702	0.233981	34305	0.0820189	0.458002	1.04478
001_C23	SPAC3A12.08	SPAC3A12.08	9378	195	0.0207933	0.260933	10394	176	0.0169328	0.07504	20143	0.154856	0.411362	1.06347	5342	163	0.0305129	0.297045	7071	122	0.0172536	-0.185157	12698	0.0329092	0.851714	1.01637
001_C24	SPBCPT2R1.03	SPBCPT2R1.03	31563	624	0.01977	0.188123	11691	174	0.0148832	-0.111095	44052	0.130451	0.253557	1.03323	29125	812	0.0278798	0.166846	13968	328	0.0234822	0.259518	44233	0.237308	0.195685	0.982481
001_D02	SPBC543.07	pek1	11303	243	0.0214987	0.309062	5498	102	0.0185522	0.206806	17146	0.284945	0.195761	0.995857	13801	568	0.0411564	0.728743	5125	139	0.027122	0.467409	19633	0.73514	0.0151176	0.444768
001_D04	SPBP4H10.03	oxa102	2312	50	0.0216263	0.317598	2247	29	0.0129061	-0.316732	4638	0.0400311	0.750724	1.04723	2645	46	0.0173913	-0.514009	1819	53	0.0291369	0.570795	4563	-0.0171094	0.698562	1.02521
001_D06	SPCC162.10	ppk33	23442	375	0.0159969	-0.117394	27358	420	0.015352	-0.0663579	51595	-0.106978	0.949688	1.01262	14810	323	0.0218096	-0.187413	16573	270	0.0162916	-0.267927	31976	-0.248152	0.778699	1.01927
001_D07	SPAC105.03C	SPAC105.03C	30344	480	0.0158186	-0.133565	13510	205	0.0151739	-0.0831882	44539	-0.109709	0.911196	1.01373	19653	420	0.0213708	-0.216736	16494	238	0.0144295	-0.443032	36805	-0.301989	0.681387	1.02338
001_D08	SPCC297.05	SPCC297.05	11310	163	0.014412	-0.267916	14075	208	0.014778	-0.121336	25756	-0.205661	0.459309	1.06051	10243	217	0.0211852	-0.229319	15714	260	0.0165458	-0.245591	26434	-0.288335	0.648161	1.02072
001_D09	SPAC1805.11C	rps2602	35744	560	0.015667	-0.147463	20336	295	0.0145063	-0.148105	56935	-0.144666	0.80228	1.03366	22393	549	0.0245166	-0.0186171	15764	285	0.0180792	-0.117724	38991	-0.0381012	0.680476	1.02348
001_D10	SPCC777.17C	SPCC777.17C	18149	381	0.0209929	0.274712	4025	59	0.0146584	-0.133058	22614	0.23553	0.205917	1.00381	11670	257	0.0220223	-0.173412	15123	280	0.0185148	-0.0833695	27330	-0.163135	0.942935	1.00384
001_D11	SPAC23H4.17C	srb10	18507	294	0.0158859	-0.127443	16309	261	0.0160034	-0.00640297	35371	-0.0803669	0.976348	1.00372	13318	378	0.0283826	0.192633	19306	369	0.0191132	-0.0374804	33371	0.0289737	0.56729	1.03767
001_D12	SPBC146.12	coq6	15436	284	0.0183985	0.0844034	26910	435	0.016165	0.00808856	43065	0.0106619	0.612246	1.06159	16740	316	0.0188769	-0.39575	24221	434	0.0179183	-0.130615	41711	-0.293561	0.719172	1.02164
001_D14	SPAC20G8.09C	nat10	2449	47	0.0191915	0.145279	4381	101	0.0230541	0.520239	6978	0.362536	0.322784	1.04955	4151	114	0.0274633	0.145128	4788	107	0.0223475	0.188064	9160	0.13966	0.744516	1.02124
001_D15	SPAC6G9.08	ubp6	5247	42	0.00800457	-1.11629	5460	79	0.0144689	-0.151833	10828	-0.576651	0.014016	0.350846	8028	136	0.0169407	-0.551881	9660	121	0.0125259	-0.64714	17945	-0.627203	0.117409	0.865579
001_D16	SPAC1071.08	rpp203	14870	330	0.0221923	0.354873	14594	307	0.021036	0.388079	30101	0.359236	0.0393366	0.585224	16407	424	0.0258426	0.0573773	17590	347	0.0197271	0.00812824	34768	0.0151226	0.5874	1.03884
001_D17	SPBC106.12C	SPBC106.12C	9979	184	0.0184387	0.0875501	15441	322	0.0208536	0.37551	25926	0.240069	0.167973	0.970304	10622	222	0.0209	-0.248871	17594	390	0.0221666	0.176339	28828	-0.0491827	0.77344	1.02045
001_D20	SPAC12B10.09	pet801	13616	234	0.0171857	-0.013983	20138	331	0.0164366	0.0321264	34319	-0.00991178	0.754591	1.04569	16708	536	0.0320804	0.369318	18797	407	0.0216524	0.142474	36448	0.243035	0.210153	0.987407
001_D21	SPBC26H8.12	SPBC26H8.12	26546	460	0.0173284	-0.00204917	29319	435	0.0148368	-0.115605	56760	-0.0731612	0.889265	1.02288	25686	600	0.023359	-0.0883952	31965	561	0.0175504	-0.160544	58812	-0.15625	0.909159	1.0106
001_D22	SPAC13G6.07C	rps601	13781	289	0.0209709	0.2732	20061	386	0.0192413	0.259423	34517	0.242969	0.113701	0.870417	13948	553	0.0396473	0.674846	21098	454	0.0215186	0.133534	36053	0.356541	0.110458	0.856456
001_D23	SPBC32F12.06	pch1	22067	378	0.0171297	-0.0186928	15309	268	0.017506	0.123069	38022	0.0363178	0.555785	1.06111	24435	568	0.0232453	-0.0954336	26774	414	0.0154628	-0.343254	52191	-0.226875	0.905312	1.01097
001_D24	SPAC15A10.11	ubr11	15893	400	0.0251683	0.53642	6039	122	0.020202	0.329715	22454	0.497908	0.0134329	0.341671	11987	279	0.0232752	-0.093581	7625	117	0.0153443	-0.354353	20008	-0.152437	0.880452	1.01008
001_E01	SPAC1296.02	cox4	24897	503	0.0202032	0.219398	9894	171	0.0172832	0.104586	35465	0.20093	0.16533	0.963863	137	4	0.0291971	0.233449	10764	257	0.0238759	0.283502	11162	0.0933885	0.768227	1.01869
001_E02	SPAC5D6.08C	mes1	24210	452	0.01867	0.105531	5673	99	0.0174511	0.118532	30434	0.129623	0.344601	1.0491	19233	337	0.017522	-0.503211	5920	120	0.0202703	0.0473134	25610	-0.304737	0.606668	1.03568
001_E03	SPAC17G8.09	shg1	44826	756	0.0168652	-0.0411381	13964	242	0.0173303	0.10851	59788	0.0103649	0.542999	1.0611	5648	10	0.00177054	-3.81012	16575	388	0.0234087	0.254996	22621	--	--	0.158655
001_E04	SPAC6B12.15	cpc2	25467	431	0.0169239	-0.0361297	12984	200	0.0154036	-0.0615194	39082	-0.0384853	0.827695	1.03225	30429	814	0.0267508	0.107206	9365	205	0.02189	0.158221	40813	0.19033	0.259892	1.00262
001_E05	SPAC2F3.18C	SPAC2F3.18C	10904	177	0.0162326	-0.0962966	8043	131	0.0162875	0.0189767	19255	-0.0521433	0.893758	1.02135	10537	281	0.0266679	0.102731	8474	203	0.0239556	0.288313	19495	0.181972	0.415724	1.037
001_E06	SPACUNK4.19	mug153	16243	267	0.0164379	-0.0781669	25523	337	0.0132038	-0.283834	42370	-0.220885	0.482578	1.05698	11642	267	0.0229342	-0.114875	15359	286	0.018621	-0.0751211	27554	-0.131934	0.980445	1.00339
001_E07	SPAC57A10.06	mug15	54101	871	0.0160995	-0.108171	20699	296	0.0143002	-0.168748	75967	-0.11141	0.96676	1.00632	37203	861	0.0231433	-0.101781	19424	369	0.0189971	-0.0462715	57857	-0.0471045	0.648343	1.02049
001_E08	SPAPB17E12.05	rpl3703	9838	192	0.0195162	0.169481	14559	212	0.0145614	-0.142631	24801	-0.0254526	0.921679	1.01465	8909	182	0.0204288	-0.281772	17028	320	0.0187926	-0.061889	26439	-0.213525	0.815846	1.01755
001_E09	SPBC1347.07	rex2	32160	514	0.0159826	-0.118688	15151	210	0.0138605	-0.213808	48035	-0.13929	0.802382	1.03337	22304	462	0.0207138	-0.261785	19098	402	0.0210493	0.101722	42266	-0.10487	0.821787	1.0193
001_E10	SPAPB8E5.02C	rpn502	28464	464	0.0163013	-0.0902022	35026	542	0.0154742	-0.0549178	64496	-0.0890751	0.942436	1.0131	20314	482	0.0237275	-0.0658167	29189	637	0.0218233	0.153817	50622	0.0104213	0.536542	1.03813
001_E11	SPBC56F2.14	mrpl44	51907	895	0.0172424	-0.00922997	34586	563	0.0162783	0.0181623	87951	0.000231266	0.54556	1.06216	35074	732	0.0208702	-0.250934	33691	649	0.0192633	-0.0261967	70146	-0.160234	0.914	1.01063
001_E12	SPBC1539.06	SPBC1539.06	3110	89	0.0286174	0.721702	4716	110	0.0233249	0.537083	8025	0.593317	0.0521619	0.660717	2401	127	0.0528946	1.09075	2460	52	0.0211382	0.107801	5040	0.714434	0.129814	0.88838
001_E13	SPCP1E11.11	puf6	14455	216	0.0149429	-0.215726	17742	247	0.0139218	-0.207442	32660	-0.229018	0.42687	1.06179	14423	326	0.0226028	-0.135875	16396	238	0.0145157	-0.434434	31383	-0.294326	0.670306	1.02682
001_E14	SPBC16C6.05	SPBC16C6.05	11477	197	0.0171648	-0.0157385	31559	589	0.0186635	0.215432	43822	0.115881	0.28772	1.04067	14067	286	0.0203313	-0.288675	29219	404	0.0138266	-0.504603	43976	-0.493505	0.332478	1.0132
001_E15	SPAC14C4.16	dad3	11072	252	0.0227601	0.391319	7538	157	0.0208278	0.373726	19019	0.382919	0.0708749	0.730521	10578	285	0.0269427	0.11752	11474	228	0.019871	0.0186135	22565	0.0518485	0.619431	1.0236
001_E18	SPBC24C6.05	sec28	17047	277	0.0162492	-0.0948204	11261	215	0.0190924	0.248217	28800	0.0443443	0.61638	1.06175	10961	342	0.0312015	0.329241	15411	291	0.0188826	-0.0549933	27005	0.0969977	0.482365	1.04077
001_E20	SPBC31F10.05	mug37	18189	307	0.0168783	-0.0400161	26338	443	0.0168198	0.0653764	45277	-0.000893989	0.642359	1.05356	17897	325	0.0181595	-0.451654	22785	369	0.0161949	-0.276515	41376	-0.395656	0.499201	1.03865
001_E21	SPAC25G10.06	rps2801	112	2	0.0178571	0.0413127	2356	66	0.0280136	0.801342	2536	0.709088	0.130412	0.888379	1775	42	0.023662	-0.0698051	1630	37	0.0226994	0.210601	3484	0.047997	0.74869	1.01985
001_E22	SPBC4C3.12	2016-09-01	1108	28	0.0252708	0.54228	4995	88	0.0176176	0.132234	6219	0.17343	0.803826	1.03312	1430	56	0.0391608	0.657036	4148	118	0.0284474	0.536247	5752	0.475067	0.329676	1.01647
001_F01	SPBPB21E7.01C	eno102	16309	304	0.01864	0.103214	8278	137	0.0165499	0.0420373	25028	0.0897788	0.518341	1.06021	11275	400	0.0354767	0.514497	9947	253	0.0254348	0.374752	21875	0.455322	0.0948222	0.793884
001_F02	SPBC56F2.08C	SPBC56F2.08C	6196	97	0.0156553	-0.148541	11112	227	0.0204284	0.345789	17632	0.151451	0.467891	1.05485	6036	152	0.0251822	0.0200312	6500	146	0.0224615	0.195405	12834	0.0830344	0.739498	1.02237
001_F04	SPCC1223.11	ptc2	9662	179	0.0185262	0.0943773	12954	187	0.0144357	-0.155144	22982	-0.0586043	0.929028	1.01495	11928	369	0.0309356	0.316893	14892	311	0.0208837	0.0903251	27500	0.176025	0.344071	1.00105
001_F05	SPCC576.01C	xan1	9496	181	0.0190607	0.135409	6688	99	0.0148026	-0.118931	16464	0.0377544	0.848422	1.02841	11323	304	0.026848	0.11244	7361	159	0.0216003	0.139001	19147	0.143008	0.488864	1.03912
001_F06	SPCC1682.08C	mcp2	11117	175	0.0157417	-0.140601	20785	299	0.0143854	-0.160182	32376	-0.181864	0.573432	1.06639	8422	193	0.0229162	-0.116009	8665	199	0.022966	0.227445	17479	0.0317537	0.742362	1.02184
001_F08	SPCC320.04C	gem1	8893	116	0.013044	-0.411806	9297	133	0.0143057	-0.168195	18439	-0.300104	0.210013	0.999067	7124	175	0.0245649	-0.01578	4082	76	0.0186183	-0.0753287	11457	-0.00278488	0.967918	1.00263
001_F09	SPAC19D5.01	pyp2	7555	145	0.0191926	0.145361	11489	184	0.0160153	-0.00533192	19373	0.0356469	0.792588	1.03684	5831	229	0.0392729	0.661157	8857	218	0.0246133	0.327386	15135	0.439436	0.153931	0.928306
001_F10	SPCC825.01	SPCC825.01	33635	523	0.0155493	-0.158341	46474	671	0.0144382	-0.154896	81303	-0.177338	0.673556	1.06326	30974	490	0.0158197	-0.650651	26254	374	0.0142454	-0.461551	58092	-0.571891	0.232307	0.988246
001_F11	SPAC24H6.11C	SPAC24H6.11C	73582	1145	0.0155609	-0.157266	64969	993	0.0152842	-0.0727422	140689	-0.127259	0.79787	1.03516	67408	1218	0.0180691	-0.458853	34621	645	0.0186303	-0.0744002	103892	-0.297552	0.705606	1.02409
001_F12	SPAC328.02	dbl4	39732	625	0.0157304	-0.141634	64949	1000	0.0153967	-0.0621637	106306	-0.118664	0.909177	1.01542	28812	508	0.0176315	-0.494217	35230	580	0.0164632	-0.252804	65130	-0.401613	0.511212	1.03359
001_F13	SPAC2E1P3.04	cao1	15424	231	0.0149767	-0.212473	14997	237	0.0158032	-0.0245713	30889	-0.131663	0.742019	1.04947	18974	476	0.025087	0.0145623	16431	328	0.0199623	0.0252236	36209	0.0170415	0.575143	1.03935
001_F14	SPAC4F10.07C	atg13	22077	607	0.0274947	0.663964	18634	495	0.0265643	0.724707	41813	0.683529	6.79252e-05	0.00579017	14593	554	0.0379634	0.612234	14042	404	0.0287708	0.552555	29593	0.576045	0.0292986	0.539368
001_F15	SPAC869.02C	SPAC869.02C	73854	1101	0.0149078	-0.219122	33131	573	0.017295	0.105569	108659	-0.107213	0.959859	1.00846	37479	625	0.016676	-0.574602	14235	279	0.0195996	-0.00122931	52618	-0.360433	0.59206	1.03717
001_F16	SPAC10F6.04	SPAC10F6.04	3532	55	0.0155719	-0.156242	6196	115	0.0185604	0.20744	9898	0.0522154	0.993723	1.00102	1675	41	0.0244776	-0.0209126	1536	28	0.0182292	-0.105803	3280	-0.0626272	0.542691	1.0398
001_F17	SPBC1105.14	rsv2	20446	438	0.0214223	0.303924	28806	715	0.0248212	0.626789	50405	0.474034	0.0023606	0.103407	9550	274	0.0286911	0.208228	11863	304	0.0256259	0.38555	21991	0.266382	0.263884	1.0057
001_F18	SPAC11E3.01C	swr1	26415	429	0.0162408	-0.0955683	41001	620	0.0151216	-0.0881753	68465	-0.115252	0.945602	1.01374	12197	206	0.0168894	-0.556257	23805	372	0.015627	-0.328014	36580	-0.483208	0.334069	1.01413
001_F19	SPBC16D10.05	mok13	79253	1161	0.0146493	-0.244358	36832	590	0.0160187	-0.00502924	117836	-0.160107	0.696783	1.05302	42434	833	0.0196305	-0.33928	15502	263	0.0169656	-0.209443	59032	-0.246485	0.86522	1.01065
001_F20	SPAC12G12.01C	SPAC12G12.01C	91174	1330	0.0145875	-0.250457	26606	368	0.0138315	-0.21683	119478	-0.225362	0.430298	1.06695	46033	771	0.0167489	-0.568313	29809	540	0.0181153	-0.114841	77153	-0.376602	0.558407	1.03526
001_F21	SPBC28F2.11	hmo1	70015	1004	0.0143398	-0.275165	31522	519	0.0164647	0.034591	103060	-0.168194	0.687513	1.05828	57915	1268	0.0218942	-0.18183	41582	643	0.0154634	-0.343192	101408	-0.224598	0.891188	1.0139
001_F22	SPAC13G6.09	SPAC13G6.09	66429	1187	0.0178687	0.0422463	22889	345	0.0150727	-0.0928425	90850	0.0252893	0.452595	1.06212	42144	842	0.0199791	-0.313882	33580	559	0.0166468	-0.236806	77125	-0.278566	0.785379	1.01954
001_F23	SPBC32F12.07C	SPBC32F12.07C	3624	61	0.0168322	-0.0439623	1267	28	0.0220994	0.459226	4980	0.110572	0.953416	1.01248	2127	84	0.0394922	0.669194	1119	36	0.0321716	0.713735	3366	0.720099	0.191939	0.98248
001_F24	SPAC15A10.16	bud6	10282	246	0.0239253	0.463349	11474	245	0.0213526	0.409629	22247	0.421206	0.0348645	0.566818	8453	299	0.0353721	0.510235	13994	402	0.0287266	0.550335	23148	0.476691	0.0780046	0.737413
001_G01	SPAC1420.03	rpn501	24558	483	0.0196677	0.180642	11443	173	0.0151184	-0.0884777	36657	0.112555	0.337385	1.0453	36703	1131	0.0308149	0.311254	12706	303	0.023847	0.281756	50843	0.370998	0.0810652	0.746179
001_G02	SPAC630.11	vps55	11455	246	0.0214753	0.307492	17350	272	0.0156772	-0.0361135	29323	0.0935287	0.45396	1.06058	9225	316	0.0342547	0.463928	18362	302	0.016447	-0.254227	28205	-0.00258259	0.674287	1.02693
001_G03	SPAC1952.02	tma23	12776	244	0.0190983	0.138256	14236	237	0.0166479	0.0505588	27493	0.0793323	0.518101	1.0611	10402	319	0.0306672	0.30432	14705	306	0.0208092	0.0851729	25732	0.149566	0.400777	1.03076
001_G04	SPAC6F6.09	eaf6	9697	265	0.027328	0.655193	13924	305	0.0219046	0.446451	24191	0.517788	0.00845433	0.256394	7100	223	0.0314085	0.338777	10183	234	0.0229795	0.228294	17740	0.23664	0.353766	1.00239
001_G05	SPAC30C2.05	erv14	20541	396	0.0192785	0.151805	32239	451	0.0139893	-0.200464	53627	-0.0707336	0.888282	1.02212	18669	456	0.0244255	-0.0239863	25559	467	0.0182715	-0.102461	45151	-0.10483	0.811248	1.02152
001_G06	SPAP11E10.01	SPAP11E10.01	23253	402	0.0172881	-0.0054099	21127	350	0.0165665	0.0434825	45132	0.00771882	0.611085	1.06367	27884	571	0.0204777	-0.278322	22345	466	0.0208548	0.088326	51266	-0.120377	0.832419	1.01844
001_G07	SPAC630.07C	SPAC630.07C	29485	420	0.0142445	-0.28478	28821	479	0.0166198	0.0481208	59205	-0.128427	0.875778	1.02342	11129	237	0.0212957	-0.221812	27646	539	0.0194965	-0.00883742	39551	-0.165271	0.980386	1.00366
001_G08	SPAPB17E12.08	SPAPB17E12.08	34357	558	0.0162412	-0.0955275	33032	414	0.0125333	-0.359018	68361	-0.224661	0.494867	1.05318	28198	558	0.0197886	-0.327703	24163	378	0.0156438	-0.326465	53297	-0.328185	0.664421	1.0258
001_G09	SPBC1604.09C	SPBC1604.09C	43573	752	0.0172584	-0.00789033	45712	634	0.0138694	-0.212875	90671	-0.118667	0.928186	1.01614	21458	401	0.0186877	-0.410289	36703	576	0.0156935	-0.321881	59138	-0.417894	0.478085	1.04225
001_G10	SPAPJ691.03	SPAPJ691.03	45656	787	0.0172376	-0.00962938	38633	634	0.0164108	0.0298647	85710	0.000386112	0.545411	1.06252	19175	421	0.0219557	-0.177782	19990	433	0.0216608	0.143037	40019	-0.0415297	0.683415	1.02252
001_G11	SPBC577.02	rpl3801	285	6	0.0210526	0.278812	120	3	0.025	0.637144	414	--	--	0.158655	325	7	0.0215385	-0.20546	130	3	0.0230769	0.234399	465	--	--	0.158655
001_G12	SPBC1539.08	arf6	117	5	0.042735	1.30023	114	4	0.0350877	1.12618	240	--	--	0.158655	149	14	0.0939597	1.91967	121	5	0.0413223	1.07487	289	--	--	0.158655
001_G13	SPAC1002.20	SPAC1002.20	96029	1429	0.0148809	-0.221725	29603	438	0.0147958	-0.119597	127499	-0.181586	0.583815	1.06436	54860	1090	0.0198688	-0.321874	23244	387	0.0166495	-0.236577	79581	-0.246999	0.861978	1.01062
001_G14	SPBC16E9.15	SPBC16E9.15	3416	45	0.0131733	-0.397572	5587	98	0.0175407	0.125923	9146	-0.0855667	0.577492	1.06828	2518	67	0.0266084	0.0995074	2384	43	0.0180369	-0.1211	5012	-0.000139716	0.757382	1.01978
001_G16	SPBC19F8.01C	spn7	16121	302	0.0187333	0.110419	6989	101	0.0144513	-0.153587	23513	0.0491584	0.672571	1.0633	7322	213	0.0290904	0.228168	4371	98	0.0224205	0.192766	12004	0.245069	0.451727	1.05102
001_G17	SPAC1851.02	slc1	49950	870	0.0174174	0.00534218	51646	741	0.0143477	-0.163968	103207	-0.0879913	0.941018	1.01227	33909	720	0.0212333	-0.226047	111186	1949	0.0175292	-0.162293	147764	-0.286899	0.643652	1.01565
001_G18	SPBC29A10.12	SPBC29A10.12	53281	941	0.0176611	0.025385	15315	272	0.0177604	0.143877	69809	0.069279	0.330884	1.0457	19181	435	0.0226787	-0.131038	11397	248	0.0217601	0.149634	31261	-0.00680932	0.658082	1.02455
001_G19	SPAC22F3.07C	atp20	26365	407	0.0154371	-0.168784	49062	675	0.0137581	-0.224503	76509	-0.232557	0.463541	1.05713	14172	380	0.0268134	0.110581	24751	513	0.0207264	0.0794201	39816	0.0318364	0.527301	1.03488
001_G20	SPBC32F12.08C	duo1	10780	224	0.0207792	0.259953	6934	143	0.020623	0.359471	18081	0.297786	0.164936	0.963348	8545	246	0.0287888	0.21313	8297	158	0.019043	-0.0427891	17246	0.096091	0.611281	1.0318
001_G21	SPAC29A4.14C	SPAC29A4.14C	2398	43	0.0179316	0.0473165	3788	76	0.0200634	0.319779	6305	0.190779	0.751785	1.04593	2598	90	0.034642	0.480148	2560	54	0.0210938	0.104764	5302	0.314984	0.602456	1.03522
001_G22	SPBC83.04	apc15	38696	708	0.0182965	0.0763764	13265	208	0.0156804	-0.0358256	52877	0.0648142	0.385246	1.05658	17028	333	0.019556	-0.344762	13205	211	0.0159788	-0.295893	30777	-0.318718	0.613862	1.02899
001_G23	SPAC4D7.11	dsc4	8203	183	0.0223089	0.362432	6500	110	0.0169231	0.0742074	14996	0.241686	0.310501	1.0474	6692	225	0.0336222	0.43704	6242	144	0.0230695	0.233937	13303	0.346251	0.275409	1.02602
001_G24	SPBP22H7.08	rps1002	33203	660	0.0198777	0.195964	10129	180	0.0177708	0.144721	44172	0.201852	0.129353	0.888846	20495	642	0.0313247	0.334926	8550	182	0.0212865	0.11789	29869	0.338154	0.142395	0.909247
001_H01	SPBPB2B2.02	mug180	12004	240	0.0199933	0.204331	6189	86	0.0138956	-0.210154	18519	0.0883843	0.634821	1.0538	22316	629	0.0281861	0.182606	9518	230	0.0241647	0.300852	32693	0.265889	0.1991	0.977794
001_H02	SPBC582.08	SPBC582.08	8217	117	0.0142388	-0.285364	5771	98	0.0169815	0.079176	14203	-0.132957	0.547946	1.06026	8320	163	0.0195913	-0.342159	6752	105	0.0155509	-0.335049	15340	-0.335839	0.436365	1.05102
001_H04	SPCC126.07C	pbr1	4582	79	0.0172414	-0.00931335	10016	145	0.0144768	-0.151038	14822	-0.135376	0.55073	1.05721	3216	103	0.0320274	0.36693	6799	129	0.0189734	-0.0480753	10247	0.0457615	0.902175	1.01213
001_H05	SPCC584.12	mug42	18438	485	0.0263044	0.600114	25069	609	0.024293	0.595753	44601	0.577189	0.000484659	0.0305723	14963	762	0.0509256	1.03602	23275	611	0.0262513	0.420339	39611	0.678052	0.00887002	0.303509
001_H06	SPCC18.03	SPCC18.03	11065	190	0.0171713	-0.0151926	14470	219	0.0151348	-0.0869185	25944	-0.0734794	0.912294	1.01387	8663	193	0.0222787	-0.156713	10161	195	0.019191	-0.0316202	19212	-0.122717	0.936667	1.00533
001_H07	SPAC12B10.14C	tea5	15246	285	0.0186934	0.107343	40311	618	0.0153308	-0.0683512	56460	-0.0523469	0.801331	1.03328	11766	358	0.0304267	0.29296	21072	432	0.0205011	0.0636521	33628	0.100286	0.428818	1.04321
001_H08	SPCC330.11	btb1	2712	61	0.0224926	0.374264	5928	71	0.0119771	-0.424511	8772	-0.141669	0.432832	1.06653	1545	37	0.0239482	-0.052457	3453	75	0.0217202	0.146988	5110	-0.00212492	0.75924	1.02097
001_H09	SPAC19D5.03	cid1	25195	407	0.016154	-0.103297	17354	257	0.0148093	-0.118284	43213	-0.111046	0.899484	1.0172	11389	257	0.0225656	-0.138248	17643	362	0.0205181	0.0648419	29651	-0.0739054	0.823667	1.01882
001_H10	SPCC895.07	alp14	15232	263	0.0172663	-0.00723113	16347	318	0.0194531	0.275216	32160	0.126469	0.337047	1.04631	7201	173	0.0240244	-0.0478726	7024	186	0.0264806	0.432886	14584	0.169354	0.523437	1.03439
001_H11	SPAC24H6.13	SPAC24H6.13	557	3	0.005386	-1.6879	63	0	0	--	623	--	--	0.158655	330	3	0.00909091	-1.44988	104	4	0.0384615	0.971365	441	--	--	0.158655
001_H12	SPBC8D2.17	gmh4	67	4	0.0597015	1.78258	62	0	0	--	133	--	--	0.158655	95	1	0.0105263	-1.23837	100	5	0.05	1.34988	201	--	--	0.158655
001_H13	SPAC30D11.13	hus5	18838	245	0.0130056	-0.416053	18794	227	0.0120783	-0.412364	38104	-0.426277	0.0769112	0.748697	10737	264	0.0245879	-0.0144285	15137	364	0.024047	0.293807	26502	0.113061	0.457375	1.04714
001_H14	SPAC1093.06C	dhc1	25067	382	0.0152392	-0.187405	10928	138	0.0126281	-0.348146	36515	-0.222389	0.460708	1.05909	12690	250	0.0197006	-0.334139	9207	169	0.0183556	-0.0958317	22316	-0.229984	0.73522	1.02229
001_H15	SPAC8C9.03	cgs1	38230	546	0.014282	-0.280993	16500	290	0.0175758	0.128802	55566	-0.141933	0.81117	1.03162	24089	505	0.0209639	-0.244467	7515	179	0.023819	0.280063	32288	-0.0523117	0.75269	1.01869
001_H16	SPAC10F6.06	vip1	64706	960	0.0148363	-0.226054	17867	309	0.0172945	0.105525	83842	-0.133154	0.86629	1.02256	20896	416	0.0199081	-0.319019	13386	281	0.0209921	0.0977933	34979	-0.142493	0.948935	1.00412
001_H17	SPBC1198.11C	reb1	37279	613	0.0164436	-0.0776646	56878	753	0.0132389	-0.280005	95523	-0.216287	0.50261	1.05191	16869	284	0.0168356	-0.560859	27843	438	0.0157311	-0.318436	45434	-0.474864	0.364185	1.0092
001_H18	SPAC11E3.05	sea3	29244	377	0.0128915	-0.428765	18202	252	0.0138446	-0.215458	48075	-0.346331	0.177289	0.980999	14318	245	0.0171113	-0.537424	10528	203	0.0192819	-0.0248036	25294	-0.315716	0.58143	1.0382
001_H19	SPBC16H5.03C	fub2	6075	125	0.0205761	0.245783	5496	135	0.0245633	0.611721	11831	0.414894	0.118163	0.868733	3682	112	0.0304183	0.292562	3085	112	0.0363047	0.888104	6991	0.56071	0.190717	0.979406
001_H20	SPAC12G12.12	SPAC12G12.12	31372	480	0.0153003	-0.181632	24160	328	0.0135762	-0.243709	56340	-0.212068	0.53588	1.061	17982	344	0.0191302	-0.37652	22227	387	0.0174113	-0.172032	40940	-0.303848	0.693061	1.02526
001_H21	SPBC29A10.02	spo5	17608	293	0.0166402	-0.0605189	17595	317	0.0180165	0.164533	35813	0.0400067	0.56083	1.0611	12700	292	0.0229921	-0.111236	21657	318	0.0146835	-0.417859	34967	-0.337996	0.594804	1.03794
001_H22	SPAC144.02	iec1	4592	73	0.0158972	-0.126415	12215	247	0.020221	0.331073	17127	0.175906	0.414748	1.06524	4006	151	0.0376935	0.601939	6593	134	0.0203246	0.0511741	10884	0.260833	0.456187	1.04823
001_H23	SPBC32H8.03	bem46	1369	20	0.0146092	-0.248311	1603	28	0.0174672	0.119868	3020	-0.0615039	0.467707	1.05519	1186	49	0.0413153	0.734302	1196	26	0.0217391	0.148242	2457	0.488516	0.542133	1.04
001_H24	SPAC1610.03C	crp79	9943	197	0.0198129	0.191254	11951	241	0.0201657	0.327117	22332	0.247291	0.189983	0.993711	12599	433	0.0343678	0.468682	13072	256	0.0195838	-0.00238802	26360	0.258164	0.240311	0.994087
001_I01	SPAC15E1.09	grx2	13442	247	0.0183752	0.0825747	10901	207	0.0189891	0.240386	24797	0.146081	0.364932	1.05985	14788	390	0.0263727	0.0866717	13621	306	0.0224653	0.195647	29105	0.126538	0.41244	1.03455
001_I02	SPAC630.15	mug177	8605	159	0.0184776	0.0905911	11673	167	0.0143065	-0.168112	20604	-0.0681476	0.858968	1.02504	6676	209	0.0313062	0.334072	9790	238	0.0243105	0.309529	16913	0.274584	0.311104	1.01488
001_I03	SPAC1B1.02C	SPAC1B1.02C	33908	598	0.017636	0.0233312	10974	132	0.0120284	-0.418336	45612	-0.0513447	0.840305	1.02845	37443	852	0.0227546	-0.126218	13866	236	0.01702	-0.204817	52397	-0.0818061	0.737468	1.02226
001_I04	SPAC6G9.09C	rpl2401	26689	407	0.0152497	-0.186405	15818	201	0.012707	-0.339156	43115	-0.236733	0.434301	1.06764	27848	712	0.0255674	0.0419281	14721	352	0.0239114	0.285648	43633	0.155422	0.299734	1.01349
001_I05	SPAC31A2.02	trm112	5762	112	0.0194377	0.163669	22744	351	0.0154326	-0.0587994	28969	-0.0533576	0.976098	1.00477	8922	255	0.028581	0.202683	22274	372	0.0167011	-0.23211	31823	-0.159096	0.989872	1.001
001_I06	SPAP27G11.15	slx1	39282	612	0.0155797	-0.155525	8758	175	0.0199817	0.313897	48827	-0.0409767	0.782354	1.0394	29439	508	0.017256	-0.525276	10150	238	0.0234483	0.25743	40335	-0.252125	0.811618	1.02036
001_I07	SPAC824.07	SPAC824.07	47717	599	0.0125532	-0.467136	8725	125	0.0143266	-0.166083	57166	-0.393884	0.107214	0.853924	30524	683	0.0223758	-0.150434	7852	145	0.0184666	-0.0871311	39204	-0.0567744	0.721957	1.02145
001_I08	SPAPB17E12.12C	SPAPB17E12.12C	42473	664	0.0156335	-0.150551	25837	407	0.0157526	-0.0291942	69381	-0.104314	0.995398	1.00047	31594	688	0.0217763	-0.189617	19924	352	0.0176671	-0.150984	52558	-0.152766	0.909507	1.01063
001_I09	SPBC16D10.02	trm11	52261	846	0.016188	-0.100266	42144	605	0.0143555	-0.163177	95856	-0.132992	0.856512	1.02677	33405	702	0.0210148	-0.240968	46769	728	0.0155659	-0.333666	81604	-0.331392	0.655554	1.02467
001_I10	SPBC1105.09	ubc15	74144	1188	0.0160229	-0.115056	25748	404	0.0156905	-0.0348895	101484	-0.0807049	0.904613	1.01608	45277	652	0.0144002	-0.786282	37731	842	0.0223159	0.186018	84502	-0.318343	0.683093	1.02301
001_I11	SPBC651.12C	dbl7	22754	366	0.0160851	-0.109465	30299	383	0.0126407	-0.34671	53802	-0.255573	0.39067	1.05675	10286	261	0.0253743	0.0309923	28923	467	0.0161463	-0.280847	39937	-0.273447	0.759663	1.02067
001_I12	SPBC1539.10	nop16	43065	707	0.016417	-0.0799942	24778	371	0.014973	-0.102425	68921	-0.0850189	0.91861	1.01446	27661	708	0.0255956	0.0435206	23255	571	0.0245539	0.323898	52195	0.162624	0.271778	1.01974
001_I14	SPBC1703.08C	SPBC1703.08C	31073	617	0.0198565	0.19442	15044	292	0.0194097	0.271996	47026	0.225877	0.0936165	0.808949	16647	500	0.0300354	0.27429	12512	324	0.0258951	0.400629	29983	0.332502	0.146647	0.926999
001_I16	SPBC21B10.08C	SPBC21B10.08C	51498	807	0.0156705	-0.147136	42861	759	0.0177084	0.13965	95925	-0.022252	0.637656	1.05462	19481	392	0.0201222	-0.30359	27004	432	0.0159976	-0.294194	47309	-0.340322	0.627905	1.02152
001_I17	SPAC18B11.08C	SPAC18B11.08C	85565	1312	0.0153334	-0.178514	42739	644	0.0150682	-0.0932769	130260	-0.144764	0.740175	1.04969	39040	752	0.0192623	-0.366596	36185	541	0.0149509	-0.391815	76518	-0.384763	0.541487	1.04066
001_I18	SPBC29A3.21	SPBC29A3.21	41767	698	0.0167118	-0.054325	15128	268	0.0177155	0.140227	57861	0.0106171	0.547613	1.06157	16405	382	0.0232856	-0.0929384	16840	341	0.0202494	0.0458277	33968	-0.0453426	0.725149	1.0232
001_I20	SPBC32H8.05	SPBC32H8.05	14171	256	0.0180651	0.0580137	22057	360	0.0163213	0.0219759	36844	0.012721	0.648477	1.05211	9428	237	0.0251379	0.0174879	12516	264	0.021093	0.104712	22445	0.0247832	0.678368	1.02619
001_I21	SPAC29A4.17C	SPAC29A4.17C	28718	529	0.0184205	0.0861239	18998	327	0.0172123	0.0986586	48572	0.0900335	0.331344	1.0461	9605	325	0.0338365	0.446207	13287	318	0.0239332	0.286959	23535	0.323774	0.187387	0.984801
001_I22	SPBC83.19C	SPBC83.19C	50098	867	0.0173061	-0.00390956	11912	189	0.0158664	-0.0188139	63066	0.0149329	0.518216	1.06065	35192	770	0.02188	-0.182765	12940	226	0.0174652	-0.167567	49128	-0.117051	0.829288	1.01977
001_I23	SPAC4G9.06C	chz1	51433	1048	0.020376	0.231684	24459	419	0.0171307	0.0918004	77359	0.197745	0.0843555	0.787152	48075	1365	0.0283931	0.193167	17064	302	0.0176981	-0.148459	66806	0.18946	0.224021	0.994668
001_I24	SPBP4H10.08	qcr10	24367	485	0.019904	0.197868	13758	230	0.0167175	0.0565786	38840	0.154102	0.229807	1.00808	15597	330	0.0211579	-0.231178	20277	543	0.0267791	0.449056	36747	0.116842	0.384326	1.01159
001_J02	SPBC725.05C	SPBC725.05C	4143	77	0.0185856	0.0989941	3038	53	0.0174457	0.118086	7311	0.103151	0.946873	1.01373	6785	199	0.0293294	0.239972	3549	62	0.0174697	-0.167196	10595	0.17045	0.629798	1.02038
001_J03	SPCC16C4.04	SPCC16C4.04	18353	340	0.0185256	0.0943303	5039	81	0.0160746	0	23813	0.0947008	0.520963	1.05939	17383	420	0.0241615	-0.0396632	5111	130	0.0254353	0.374782	23044	0.123691	0.473093	1.04293
001_J04	SPCC126.08C	SPCC126.08C	9599	181	0.0188561	0.119845	15011	238	0.015855	-0.019843	25029	0.0146014	0.770837	1.04032	12304	271	0.0220254	-0.17321	19354	364	0.0188075	-0.0607453	32293	-0.162014	0.986175	1.00242
001_J05	SPCC74.05	rpl2702	14152	249	0.0175947	0.0199512	25264	340	0.0134579	-0.256333	40005	-0.173618	0.638944	1.05454	10969	274	0.0249795	0.00836843	18845	430	0.0228177	0.218103	30518	0.0733846	0.498619	1.03882
001_J06	SPCC1840.02C	bgs4	40994	746	0.0181978	0.0685743	8579	160	0.0186502	0.214406	50479	0.116852	0.258398	1.04085	26177	606	0.0231501	-0.101357	10341	197	0.0190504	-0.042232	37321	-0.0294086	0.66943	1.02648
001_J08	SPCC550.15C	SPCC550.15C	1351	20	0.0148038	-0.229216	1308	29	0.0221713	0.463906	2708	0.128794	0.862919	1.02202	941	32	0.0340064	0.45343	1066	8	0.00750469	-1.38619	2047	-0.171241	0.332015	1.01573
001_J09	SPAC20H4.07	rad57	27187	577	0.0212234	0.290466	20440	372	0.0181996	0.179123	48576	0.241524	0.0755659	0.744796	16075	394	0.0245101	-0.0189986	19073	534	0.0279977	0.513256	36076	0.234481	0.221119	0.990159
001_J10	SPCC965.10	SPCC965.10	62866	1059	0.0168454	-0.0428378	29343	476	0.0162219	0.0131607	93744	-0.017845	0.618451	1.05781	47367	1015	0.0214284	-0.21285	29807	666	0.0223437	0.187819	78855	-0.0430679	0.632413	1.01885
001_J11	SPAC25A8.01C	fft3	60202	929	0.0154314	-0.169321	27463	455	0.0165677	0.0435929	89049	-0.0943331	0.957458	1.00997	27445	477	0.0173802	-0.51493	12736	228	0.017902	-0.13193	40886	-0.355091	0.580412	1.03933
001_J13	SPAC328.05	SPAC328.05	72747	1076	0.014791	-0.23047	27226	408	0.0149857	-0.1012	101457	-0.183223	0.625579	1.05852	38096	709	0.0186109	-0.416229	14599	253	0.01733	-0.178784	53657	-0.29783	0.735236	1.02186
001_J15	SPAC9E9.08	rad26	65887	888	0.0134776	-0.364623	11961	160	0.0133768	-0.265051	78896	-0.324197	0.207225	0.999367	38841	687	0.0176875	-0.489646	12591	212	0.0168374	-0.220381	52331	-0.360546	0.591484	1.03732
001_J17	SPBC1198.12	mfr1	61122	820	0.0134158	-0.371256	32104	484	0.015076	-0.0925305	94530	-0.268965	0.328179	1.04977	33548	551	0.0164242	-0.59655	16590	295	0.0177818	-0.141651	50984	-0.411448	0.48513	1.04245
001_J18	SPAC11E3.09	pyp3	33040	562	0.0170097	-0.0288321	17122	248	0.0144843	-0.150296	50972	-0.0617771	0.859774	1.02407	15840	356	0.0224747	-0.144071	9651	203	0.0210341	0.100677	26050	-0.0333405	0.764377	1.02133
001_J19	SPBC1778.04	spo6	89696	1424	0.0158758	-0.128355	29548	464	0.0157033	-0.0337201	121132	-0.0901621	0.980119	1.00334	50269	950	0.0188983	-0.394117	18680	347	0.018576	-0.0786107	70246	-0.254624	0.847818	1.01829
001_J20	SPAC139.04C	fap2	69253	1037	0.0149741	-0.212721	30753	444	0.0144376	-0.154952	101487	-0.186619	0.611343	1.06353	45107	845	0.0187332	-0.406775	19684	389	0.0197622	0.0106948	66025	-0.236724	0.892721	1.01345
001_J21	SPBC29A10.10C	dbl8	37875	763	0.0201452	0.215249	47637	925	0.0194177	0.272586	87200	0.228012	0.0538164	0.668256	30316	750	0.0247394	-0.00556427	28456	557	0.0195741	-0.00310749	60079	-0.0131426	0.57094	1.03771
001_J22	SPAC144.05	SPAC144.05	40926	671	0.0163954	-0.0818934	29255	436	0.0149034	-0.10914	71288	-0.0956014	0.963878	1.00665	32174	752	0.0233729	-0.0875381	23927	429	0.0179295	-0.129714	57282	-0.0922903	0.7543	1.01868
001_J23	SPBC354.03	swd3	22833	394	0.0172557	-0.00811334	21568	343	0.0159032	-0.0154683	45138	-0.0220317	0.724598	1.0522	12760	235	0.0184169	-0.431343	16245	253	0.015574	-0.33291	29493	-0.415621	0.419268	1.04008
001_J24	SPAC1635.01	SPAC1635.01	25879	521	0.0201322	0.214313	14429	268	0.0185737	0.208477	41097	0.215855	0.121257	0.873158	15926	420	0.026372	0.0866299	13803	303	0.0219517	0.162284	30452	0.115924	0.421237	1.04086
001_K02	SPAC664.10	klp2	17135	306	0.0178582	0.0413969	8069	136	0.0168546	0.0683604	25646	0.0572895	0.613477	1.06255	18553	494	0.0266264	0.100483	6697	117	0.0174705	-0.16713	25861	0.108688	0.471259	1.044
001_K03	SPAC227.14	SPAC227.14	38784	587	0.0151351	-0.19729	25799	384	0.0148843	-0.110993	65554	-0.164787	0.727683	1.05377	59307	1220	0.0205709	-0.271769	19059	285	0.0149536	-0.391562	79871	-0.224737	0.917967	1.01041
001_K05	SPAC343.20	SPAC343.20	34592	547	0.0158129	-0.134086	29275	466	0.015918	-0.0141237	64880	-0.0876126	0.935372	1.01276	33563	770	0.0229419	-0.114389	19155	331	0.0172801	-0.182942	53819	-0.103754	0.787137	1.01888
001_K06	SPAP27G11.16	SPAP27G11.16	27614	477	0.0172738	-0.00659916	7675	101	0.0131596	-0.288668	35867	-0.0412532	0.863148	1.02191	15865	291	0.0183423	-0.437204	6984	128	0.0183276	-0.0980336	23268	-0.291382	0.613294	1.02858
001_K07	SPAC890.07C	rmt1	53788	992	0.0184428	0.0878672	31398	495	0.0157653	-0.0280286	86673	0.0506122	0.36987	1.05956	66296	1821	0.0274677	0.145362	18095	325	0.0179608	-0.127203	86537	0.180288	0.234778	0.988075
001_K09	SPBC19G7.02	SPBC19G7.02	23201	440	0.0189647	0.128128	29009	442	0.0152367	-0.0772386	53092	0.00334833	0.590583	1.06318	10436	269	0.0257762	0.0536619	24897	463	0.0185966	-0.0770117	36065	-0.115373	0.876898	1.01116
001_K10	SPBC11C11.07	rpl1801	52978	832	0.0157046	-0.143998	10623	177	0.016662	0.0517737	64610	-0.0872994	0.934398	1.01379	39628	870	0.0219542	-0.17788	11913	219	0.0183833	-0.0936578	52630	-0.0869893	0.749267	1.01887
001_K11	SPBC713.09	SPBC713.09	23239	429	0.0184603	0.0892411	39552	555	0.0140322	-0.196047	63775	-0.105004	0.985867	1.00142	11019	284	0.0257737	0.0535222	17130	311	0.0181553	-0.111663	28744	-0.0863949	0.861021	1.01213
001_K13	SPAC13A11.03	mcp7	8764	171	0.0195116	0.169146	9261	113	0.0122017	-0.397702	18309	-0.0972125	0.722781	1.05296	7394	282	0.038139	0.618893	10729	175	0.0163109	-0.266213	18580	0.168172	0.452486	1.04814
001_K16	SPBC21C3.11	ubx4	49760	799	0.0160571	-0.11198	18879	261	0.0138249	-0.217517	69699	-0.12614	0.897893	1.01796	41101	917	0.0223109	-0.154627	20776	404	0.0194455	-0.0126146	63198	-0.0720455	0.700538	1.02429
001_K17	SPAC18B11.09C	SPAC18B11.09C	1204	15	0.0124585	-0.478061	48918	645	0.0131853	-0.285851	50782	-0.356082	0.16125	0.961406	31386	325	0.0103549	-1.26206	43667	776	0.0177709	-0.142539	76154	-0.613368	0.180471	0.974479
001_K18	SPBC29B5.03C	rpl26	35446	641	0.0180838	0.059513	17581	266	0.01513	-0.0873753	53934	0.0212712	0.522496	1.06046	19145	365	0.019065	-0.381447	14228	248	0.0174304	-0.170445	33986	-0.288995	0.697003	1.02579
001_K19	SPAC23A1.11	rpl1602	53946	793	0.0146999	-0.239384	43037	594	0.0138021	-0.219899	98370	-0.23694	0.424472	1.06761	32258	726	0.022506	-0.142063	32914	566	0.0171963	-0.189951	66464	-0.178919	0.961435	1.00285
001_K20	SPBC337.09	erg28	24484	410	0.0167456	-0.0514039	23368	315	0.01348	-0.253967	48577	-0.153702	0.745447	1.04868	19980	473	0.0236737	-0.0690919	9484	196	0.0206664	0.0752341	30133	0.0168521	0.615865	1.02906
001_K21	SPAC2C4.05	cor1	11774	274	0.0232716	0.423383	22908	488	0.0213026	0.406245	35444	0.3825	0.0213928	0.440998	7448	215	0.0288668	0.217036	8019	201	0.0250655	0.353649	15883	0.261189	0.345903	0.996252
001_K22	SPBC839.14C	see1	8369	145	0.0173258	-0.0022628	23134	321	0.0138757	-0.212226	31969	-0.188263	0.54986	1.05877	3799	91	0.0239537	-0.0521286	10844	173	0.0159535	-0.298177	14907	-0.315874	0.464275	1.04695
001_K23	SPAC4H3.06	SPAC4H3.06	35479	646	0.018208	0.0693803	10496	171	0.0162919	0.0193722	46792	0.0763823	0.376712	1.06085	26300	651	0.0247529	-0.00478071	10448	199	0.0190467	-0.0425103	37598	0.0435963	0.514053	1.036
001_K24	SPBP4H10.12	SPBP4H10.12	8745	152	0.0173814	0.00235249	9439	166	0.0175866	0.129693	18502	0.053253	0.750295	1.04756	5844	173	0.029603	0.253369	9744	248	0.0254516	0.375702	16009	0.267184	0.335171	1.01065
001_L01	SPBPB8B6.04C	grt1	10156	186	0.0183143	0.0777818	13234	201	0.0151882	-0.0818381	23777	-0.0266625	0.940902	1.01249	14487	446	0.0307862	0.309909	14476	276	0.019066	-0.0410467	29685	0.151587	0.366842	1.00594
001_L02	SPBC725.06C	ppk31	5312	101	0.0190136	0.13184	8271	124	0.0149921	-0.100578	13808	-0.0249813	0.87455	1.02502	7412	267	0.0360227	0.53653	10867	234	0.0215331	0.134503	18780	0.288423	0.268951	1.01396
001_L03	SPCC16C4.11	pef1	14162	242	0.017088	-0.0222065	14560	252	0.0173077	0.106629	29216	0.0292507	0.663827	1.05583	11153	270	0.0242087	-0.0368479	11561	213	0.018424	-0.0904647	23197	-0.0777595	0.900577	1.01395
001_L04	SPCC126.11C	SPCC126.11C	1742	58	0.0332951	0.94012	11179	207	0.0185169	0.204055	13186	0.28317	0.27066	1.04232	1547	50	0.0323206	0.380079	8621	200	0.0231992	0.242021	10418	0.131691	0.713633	1.02581
001_L05	SPCC794.15	SPCC794.15	16978	320	0.0188479	0.119217	33966	516	0.0151917	-0.0815047	51780	-0.0385135	0.759924	1.04527	13179	336	0.0254951	0.0378449	17180	308	0.0179278	-0.129852	31003	-0.0812644	0.829875	1.02009
001_L06	SPCC188.02	par1	34206	579	0.0169269	-0.0358746	18311	264	0.0144176	-0.156957	53360	-0.070356	0.887554	1.02315	26346	503	0.0190921	-0.379401	14597	226	0.0154826	-0.341401	41672	-0.333899	0.628291	1.02109
001_L07	SPAC139.03	toe2	21978	338	0.015379	-0.174225	16307	213	0.0130619	-0.299422	38836	-0.227831	0.451216	1.06125	12542	294	0.0234412	-0.0833267	8501	144	0.0169392	-0.211688	21481	-0.10861	0.996036	1.00081
001_L08	SPCC622.17	SPCC622.17	9778	222	0.022704	0.38776	14755	305	0.020671	0.362821	25060	0.349975	0.0608811	0.703366	5242	134	0.0255628	0.0416683	9108	194	0.0213	0.118799	14678	0.0264442	0.814086	1.01898
001_L09	SPAC227.15	SPAC227.15	6293	168	0.0266963	0.621453	12870	300	0.02331	0.536166	19631	0.535081	0.0118534	0.314166	4451	150	0.0337003	0.440386	9385	235	0.02504	0.35218	14221	0.310231	0.305476	1.01225
001_L10	SPCC970.07C	raf2	1512	37	0.0244709	0.495879	3077	57	0.0185245	0.204653	4683	0.281377	0.623997	1.05868	1352	24	0.0177515	-0.484436	2038	30	0.0147203	-0.414243	3444	-0.494527	0.0991824	0.808876
001_L12	SPBC1685.11	rlp1	59920	833	0.0139019	-0.31991	9732	120	0.0123305	-0.382558	70605	-0.300793	0.265734	1.03857	44707	816	0.0182522	-0.444307	8097	152	0.0187724	-0.06344	53772	-0.291841	0.749562	1.01883
001_L13	SPAC4A8.06C	SPAC4A8.06C	70936	846	0.0119262	-0.541049	12663	176	0.0138988	-0.209828	84621	-0.463267	0.037527	0.577366	51253	946	0.0184575	-0.428172	16149	239	0.0147997	-0.406486	68587	-0.352177	0.616279	1.02702
001_L14	SPAC1006.06	rgf2	22683	389	0.0171494	-0.0170298	12010	222	0.0184846	0.201539	35304	0.0634236	0.488317	1.0549	15901	577	0.036287	0.547078	13090	370	0.0282659	0.527008	29938	0.541558	0.0374389	0.583454
001_L15	SPACUNK4.16C	SPACUNK4.16C	38376	647	0.0168595	-0.0416272	15581	232	0.0148899	-0.110447	54836	-0.0490511	0.792575	1.03725	32387	704	0.0217371	-0.192215	15210	214	0.0140697	-0.479461	48515	-0.218577	0.918371	1.0105
001_L17	SPBC1347.02	fkbp39	12661	267	0.0210884	0.28126	17200	250	0.0145349	-0.145265	30378	0.0387976	0.617328	1.06049	8222	196	0.0238385	-0.0590831	8530	171	0.0200469	0.0313267	17119	-0.0347541	0.898207	1.01492
001_L18	SPAC11G7.02	pub1	1666	27	0.0162065	-0.0986175	14717	235	0.0159679	-0.00960731	16645	-0.0757369	0.766129	1.04514	7912	155	0.0195905	-0.342222	9299	149	0.0160232	-0.291887	17515	-0.34546	0.447749	1.05503
001_L19	SPBC17G9.02C	cdc73	45069	673	0.0149327	-0.216717	45279	716	0.0158131	-0.023667	91737	-0.132622	0.862677	1.0225	22412	393	0.0175352	-0.502118	15940	294	0.0184442	-0.0888874	39039	-0.325193	0.638751	1.01401
001_L21	SPBC29A3.03C	SPBC29A3.03C	65331	831	0.0127198	-0.448108	61942	755	0.0121888	-0.399226	128859	-0.435638	0.0356233	0.570334	25771	388	0.0150557	-0.722067	24216	319	0.0131731	-0.574456	50694	-0.666044	0.135352	0.906573
001_L22	SPAC1486.04C	alm1	17179	350	0.0203737	0.23152	12819	188	0.0146657	-0.132336	30536	0.0896357	0.452585	1.06288	7131	183	0.0256626	0.0472919	6213	157	0.0252696	0.365351	13684	0.183143	0.518581	1.03585
001_L23	SPBC3D6.10	apn2	23651	461	0.0194918	0.167677	28074	488	0.0173826	0.112862	52674	0.122442	0.238994	1.02001	11099	293	0.0263988	0.0880955	14051	199	0.0141627	-0.469956	25642	-0.198101	0.843974	1.01833
001_L24	SPAC167.01	ire1	8368	189	0.022586	0.380243	22491	447	0.0198746	0.306143	31495	0.290231	0.079205	0.759309	4699	182	0.0387316	0.641137	13239	266	0.0200922	0.0345802	18386	0.154279	0.480138	1.04024
001_M01	SPAC1751.04	SPAC1751.04	20969	359	0.0171205	-0.0194628	9494	152	0.0160101	-0.00580108	30974	-0.0068389	0.775864	1.03954	95	5	0.0526316	1.08355	12534	279	0.0222595	0.182366	12913	0.00294967	0.91196	1.01122
001_M02	SPAC683.03	SPAC683.03	4716	89	0.0188719	0.121053	6451	124	0.0192218	0.257961	11380	0.178508	0.561521	1.06114	5657	197	0.0348241	0.487711	6481	184	0.0283907	0.533365	12519	0.484059	0.148894	0.929997
001_M03	SPAC23C11.10	mpn1	7240	136	0.0187845	0.114357	10110	152	0.0150346	-0.0964961	17638	-0.021971	0.970005	1.00572	8686	219	0.025213	0.0217916	10635	209	0.0196521	0.00263097	19749	-0.0187598	0.814608	1.01883
001_M04	SPAC823.02	SPAC823.02	12893	240	0.0186148	0.101258	11338	218	0.0192274	0.258378	24689	0.165389	0.320094	1.04728	8598	252	0.0293091	0.238975	9886	202	0.0204329	0.0588445	18938	0.130214	0.515758	1.03612
001_M05	SPAC3G6.13C	rpl4101	21608	380	0.0175861	0.0192453	18695	286	0.0152982	-0.0714218	40969	-0.0284692	0.775012	1.03972	13511	312	0.0230923	-0.104964	13952	213	0.0152666	-0.36167	27988	-0.231373	0.788261	1.01699
001_M07	SPAC8C9.14	prr1	39089	609	0.0155798	-0.155509	31269	420	0.0134318	-0.259128	71387	-0.204648	0.568144	1.06283	23704	549	0.0231606	-0.1007	23640	379	0.0160321	-0.291084	48272	-0.195258	0.975563	1.0046
001_M08	SPAPB18E9.04C	SPAPB18E9.04C	26430	444	0.0167991	-0.0468053	16154	259	0.0160332	-0.0037238	43287	-0.029891	0.766224	1.04482	38832	726	0.0186959	-0.409652	21387	352	0.0164586	-0.253211	61297	-0.326134	0.675157	1.02726
001_M09	SPBC215.04	git11	16875	271	0.0160593	-0.111783	28361	392	0.0138218	-0.217839	45899	-0.201567	0.556629	1.05951	11651	307	0.0263497	0.0854094	19121	328	0.0171539	-0.193514	31407	-0.121062	0.921521	1.00867
001_M10	SPBC1348.01	SPBC1348.01	14651	202	0.0137875	-0.331832	14480	245	0.0169199	0.0739357	29578	-0.135385	0.717952	1.05224	10273	386	0.0375742	0.597368	13656	290	0.0212361	0.114466	24605	0.332062	0.172703	0.962247
001_M12	SPBC15D4.06	naa30	4049	79	0.019511	0.169098	5084	61	0.0119984	-0.421939	9273	-0.136838	0.453061	1.06163	4364	130	0.0297892	0.262413	2435	55	0.0225873	0.203458	6984	0.27793	0.574706	1.03916
001_M14	SPBC1709.18	tif452	31291	515	0.0164584	-0.0763639	18482	257	0.0139054	-0.209137	50545	-0.119867	0.8915	1.02061	15242	426	0.0279491	0.170426	12083	230	0.019035	-0.0433968	27981	0.0972735	0.47344	1.04223
001_M18	SPBC2D10.16	mhf1	19073	474	0.0248519	0.518167	8095	171	0.0211242	0.394109	27813	0.494287	0.00805913	0.259372	26218	910	0.034709	0.482933	7015	197	0.0280827	0.517629	34340	0.569766	0.0259395	0.523445
001_M19	SPAC23C11.08	php3	29334	614	0.0209313	0.270476	12594	242	0.0192155	0.257486	42784	0.276593	0.0589823	0.702	19278	544	0.0282187	0.184276	14970	307	0.0205077	0.0641125	35099	0.146939	0.343484	1.00398
001_M20	SPBC337.16	cho1	24474	433	0.0176922	0.0279286	25227	424	0.0168074	0.0643112	50558	0.0329162	0.495548	1.0525	22676	568	0.0250485	0.0123493	12804	315	0.0246017	0.326705	36363	0.149207	0.334234	1.01268
001_M21	SPAC2C4.08	SPAC2C4.08	48638	849	0.0174555	0.0084921	18546	270	0.0145584	-0.142933	68303	-0.0170837	0.62933	1.05693	27817	681	0.0244814	-0.0206875	12143	205	0.0168822	-0.216553	40846	-0.0174507	0.626303	1.02103
001_M22	SPBC887.08	SPBC887.08	48829	876	0.0179402	0.0480041	11768	197	0.0167403	0.058542	61670	0.0712276	0.341065	1.04744	26169	613	0.0234247	-0.0843472	10812	206	0.0190529	-0.042041	37800	-0.0191216	0.644164	1.01595
001_M23	SPAC57A10.14	sgf11	14815	360	0.0242997	0.48575	21291	425	0.0199615	0.312435	36891	0.36735	0.0241721	0.476492	13265	502	0.037844	0.607687	12495	250	0.020008	0.0285253	26512	0.379399	0.123869	0.886227
001_M24	SPBP8B7.22	erd2	6607	121	0.0183139	0.0777513	4508	84	0.0186335	0.213117	11320	0.130012	0.702086	1.05096	5758	143	0.024835	0	3368	88	0.0261283	0.413559	9357	0.173637	0.668122	1.02698
001_N01	SPBPB8B6.05C	SPBPB8B6.05C	7592	141	0.0185722	0.0979547	9188	154	0.016761	0.0603231	17075	0.0608681	0.75628	1.04436	9758	416	0.0426317	0.779551	9358	244	0.0260739	0.410557	19776	0.621485	0.035517	0.573371
001_N02	SPBC725.10	SPBC725.10	6105	142	0.0232596	0.422639	7867	104	0.0132198	-0.282086	14218	0.0630156	0.821489	1.03185	7948	271	0.0340966	0.457254	8760	207	0.0236301	0.268576	17186	0.350271	0.215306	0.983721
001_N03	SPCC24B10.18	SPCC24B10.18	9467	146	0.015422	-0.170199	8868	129	0.0145467	-0.144094	18610	-0.168273	0.506149	1.05512	12530	322	0.0256983	0.0492988	9600	213	0.0221875	0.177695	22665	0.107335	0.50788	1.0355
001_N04	SPCC1322.14C	vtc4	12899	179	0.013877	-0.322488	8720	138	0.0158257	-0.0225162	21936	-0.200921	0.445607	1.06554	11161	283	0.0253562	0.0299603	8082	145	0.0179411	-0.128783	19671	-0.0129238	0.802697	1.02097
001_N05	SPAC23C4.08	rho3	12907	222	0.0172	-0.0127826	12646	176	0.0139174	-0.20789	25951	-0.113828	0.762875	1.04477	11473	260	0.0226619	-0.132107	15158	269	0.0177464	-0.144525	27160	-0.17604	0.910651	1.01119
001_N06	SPCC24B10.09	rps1702	6738	113	0.0167706	-0.0492581	16290	250	0.0153468	-0.066843	23391	-0.0965237	0.796129	1.03503	5836	174	0.0298149	0.26366	12868	311	0.0241685	0.301075	19189	0.208437	0.376983	1.01692
001_N07	SPAC13F5.05	SPAC13F5.05	9962	158	0.0158603	-0.129771	21201	320	0.0150936	-0.0908449	31641	-0.135928	0.731883	1.0526	7997	158	0.0197574	-0.329982	16614	269	0.0161912	-0.276845	25038	-0.371268	0.47179	1.04371
001_N08	SPCC663.03	pmd1	20852	320	0.0153462	-0.177302	11693	199	0.0170187	0.0823389	33064	-0.0798055	0.959954	1.00822	16695	372	0.0222821	-0.156489	9153	203	0.0221785	0.177111	26423	-0.0126916	0.71396	1.02487
001_N09	SPAC22G7.06C	ura1	16166	223	0.0137944	-0.331108	9550	123	0.0128796	-0.319699	26062	-0.324998	0.192191	0.99372	15095	451	0.0298774	0.266681	12845	263	0.0204749	0.061804	28654	0.187391	0.318991	1.0133
001_N10	SPAC57A7.13	SPAC57A7.13	11207	166	0.0148122	-0.228405	21499	321	0.0149309	-0.106481	33193	-0.178738	0.588556	1.06257	10849	304	0.028021	0.174134	18152	384	0.0211547	0.108926	29689	0.0801051	0.491992	1.03737
001_N11	SPAC27E2.02	SPAC27E2.02	21732	366	0.0168415	-0.0431658	32720	458	0.0139976	-0.19961	55276	-0.155445	0.75422	1.04563	16776	459	0.0273605	0.13972	19269	350	0.0181639	-0.110979	36854	0.000139703	0.607341	1.03514
001_N12	SPAC17C9.07	alg8	18361	305	0.0166113	-0.0630239	13765	209	0.0151834	-0.0822861	32640	-0.0750772	0.975001	1.00528	16807	378	0.0224906	-0.143051	23573	401	0.017011	-0.205585	41159	-0.218218	0.896679	1.01392
001_N13	SPAC607.06C	SPAC607.06C	53986	873	0.0161709	-0.101792	13857	255	0.0184023	0.195098	68971	-0.019609	0.638377	1.05526	34873	1029	0.0295071	0.248685	18432	278	0.0150825	-0.37918	54612	0.127716	0.31854	1.017
001_N14	SPAC1039.05C	klf1	37370	645	0.0172598	-0.00776995	16984	282	0.0166039	0.0467344	55281	0.017079	0.532601	1.06453	40350	707	0.0175217	-0.503234	20662	318	0.0153906	-0.350005	62037	-0.417742	0.47897	1.04202
001_N15	SPAPB24D3.01	toe3	9367	181	0.0193232	0.155142	8202	147	0.0179225	0.156984	17897	0.14756	0.472953	1.05794	11129	302	0.0271363	0.127849	10046	224	0.0222974	0.184826	21701	0.1465	0.448047	1.05258
001_N16	SPAC1142.08	fhl1	10733	176	0.016398	-0.0816665	12081	193	0.0159755	-0.00892348	23183	-0.0594028	0.928932	1.01555	12467	284	0.0227801	-0.124599	16866	258	0.015297	-0.358799	29875	-0.280433	0.691296	1.02554
001_N17	SPBC13E7.04	atp16	45624	713	0.0156277	-0.151079	10756	159	0.0147824	-0.120899	57252	-0.12396	0.891382	1.02085	36694	903	0.0246089	-0.0131936	12050	210	0.0174274	-0.170696	49857	0.0249562	0.508776	1.03531
001_N18	SPAC11H11.04	mam2	29161	482	0.0165289	-0.0701956	13550	212	0.0156458	-0.039013	43405	-0.0527762	0.858067	1.0263	17470	368	0.0210647	-0.237549	13813	285	0.0206327	0.0728833	31936	-0.104497	0.877871	1.01043
001_N19	SPBC216.05	rad3	48215	756	0.0156798	-0.146284	33527	476	0.0141975	-0.179146	82974	-0.161251	0.741379	1.04998	33060	606	0.0183303	-0.438144	20901	410	0.0196163	0	54977	-0.253289	0.844294	1.01833
001_N20	SPAC13C5.03	tht1	34367	820	0.0238601	0.459411	10664	235	0.0220368	0.455128	46086	0.475148	0.00288668	0.119797	24224	458	0.0189069	-0.393465	6153	132	0.0214529	0.129124	30967	-0.208465	0.865141	1.01094
001_N21	SPBC29A3.07C	sap14	42226	643	0.0152276	-0.188501	14473	206	0.0142334	-0.175504	57548	-0.170663	0.695716	1.05444	22695	535	0.0235735	-0.075211	9351	200	0.0213881	0.124755	32781	0.0313991	0.566166	1.03803
001_N23	SPBC4B4.07C	usp102	25412	469	0.0184558	0.0888895	19380	360	0.0185759	0.208644	45621	0.135027	0.237135	1.01758	19706	580	0.0294327	0.245042	29759	531	0.0178433	-0.136666	50576	0.00117798	0.55583	1.03597
001_N24	SPAC167.07C	hul5	8721	184	0.0210985	0.281952	14963	320	0.0213861	0.411888	24188	0.336407	0.0745535	0.741772	7104	264	0.0371622	0.581459	10691	235	0.0219811	0.164212	18294	0.321367	0.234892	0.987237
001_O01	SPAC1786.04	SPAC1786.04	27745	546	0.0196792	0.181485	9016	154	0.0170807	0.0875865	37461	0.176075	0.195935	0.995133	33139	964	0.0290896	0.228128	5769	163	0.0282545	0.526427	40035	0.368148	0.0953144	0.793783
001_O02	SPAC694.03	SPAC694.03	21140	442	0.0209082	0.268882	10374	167	0.0160979	0.00209138	32123	0.197345	0.190257	0.988586	36673	1068	0.0291222	0.229746	14781	285	0.0192815	-0.0248339	52807	0.228606	0.191023	0.979382
001_O07	SPAC8E11.07C	alp31	31881	613	0.0192278	0.148002	20592	317	0.0153943	-0.0623856	53403	0.0725513	0.360987	1.05814	20073	632	0.0314851	0.342293	24797	489	0.0197201	0.00761693	45991	0.154762	0.294702	1.0139
001_O08	SPAPB1E7.07	glt1	14578	227	0.0155714	-0.156289	23478	372	0.0158446	-0.0207913	38655	-0.0986721	0.925149	1.01564	13581	394	0.0290111	0.22423	14892	322	0.0216223	0.140471	29189	0.164164	0.350367	1.00178
001_O09	SPBC2A9.13	SPBC2A9.13	22046	421	0.0190964	0.138115	38410	571	0.0148659	-0.112776	61448	-0.0386496	0.730751	1.05338	17638	434	0.024606	-0.0133674	42260	701	0.0165878	-0.24193	61033	-0.244088	0.872554	1.01097
001_O10	SPBC1348.14C	ght7	22254	371	0.0166712	-0.057834	8177	126	0.0154091	-0.0610043	30928	-0.0454001	0.924515	1.01529	18324	481	0.0262497	0.079927	9717	190	0.0195534	-0.0046354	28712	0.0925741	0.476193	1.04391
001_O11	SPCC4B3.02C	SPCC4B3.02C	15445	313	0.0202655	0.223834	18488	297	0.0160645	-0.000910686	34543	0.0930161	0.406001	1.06533	14453	430	0.0297516	0.260592	19266	307	0.0159348	-0.29987	34456	-0.038098	0.705553	1.02448
001_O12	SPBC1604.18C	SPBC1604.18C	12957	304	0.0234622	0.435151	7132	204	0.0286035	0.831406	20597	0.585319	0.0052688	0.188839	9125	318	0.0348493	0.488755	5300	184	0.034717	0.82359	14927	0.632915	0.0489967	0.670615
001_O13	SPAC13G7.07	arb2	10813	168	0.0155369	-0.159494	15711	238	0.0151486	-0.0855979	26930	-0.138923	0.682763	1.05976	9446	239	0.0253017	0.0268597	20347	342	0.0168084	-0.222872	30374	-0.202636	0.874612	1.01149
001_O14	SPBC1711.14	rec15	7331	133	0.0181421	0.0641558	12938	213	0.0164631	0.0344544	20615	0.018393	0.829259	1.03175	10272	267	0.025993	0.0657472	12540	262	0.0208931	0.0909775	23341	0.0472739	0.619232	1.02489
001_O16	SPBC23E6.05	arx1	58670	890	0.0151696	-0.194006	15321	239	0.0155995	-0.0432843	75120	-0.14348	0.822375	1.03255	34980	753	0.0215266	-0.206256	15635	278	0.0177806	-0.141746	51646	-0.139793	0.879224	1.01088
001_O17	SPAC19D5.11C	ctf8	13491	262	0.0194204	0.162381	9261	169	0.0182486	0.182999	23183	0.16859	0.331763	1.04533	17979	367	0.0204127	-0.282908	9101	143	0.0157126	-0.320134	27590	-0.252931	0.735728	1.0212
001_O18	SPBC2D10.20	ubc1	6306	106	0.0168094	-0.0459214	3600	76	0.0211111	0.393218	10088	0.12446	0.764119	1.04376	3445	56	0.0162554	-0.611453	3035	74	0.0243822	0.313777	6610	-0.161755	0.534653	1.03894
001_O19	SPAC23C4.16C	atg15	3951	87	0.0220197	0.343609	18756	321	0.0171145	0.0904367	23115	0.0923279	0.538901	1.06165	4245	128	0.0301531	0.279932	8426	207	0.0245668	0.324659	13006	0.23643	0.441391	1.05345
001_O20	SPBC3B9.05	SPBC3B9.05	11798	214	0.0181387	0.0638799	33535	517	0.0154167	-0.0602878	46064	-0.0637944	0.889592	1.02251	7077	246	0.0347605	0.485073	11516	260	0.0225773	0.20282	19099	0.278177	0.278345	1.02965
001_O21	SPAC2C4.09	SPAC2C4.09	6538	125	0.019119	0.139818	16717	271	0.016211	0.0121924	23651	0.0148553	0.7906	1.03725	6487	198	0.0305226	0.297502	16378	325	0.0198437	0.0166286	23388	0.0274692	0.660527	1.02532
001_O22	SPBC8D2.02C	vps68	13600	298	0.0219118	0.336517	16470	281	0.0170613	0.0859451	30649	0.192134	0.209323	1.00031	8310	235	0.0282792	0.187365	11727	214	0.0182485	-0.104275	20486	-0.00215193	0.765576	1.0199
001_P01	SPBPJ4664.02	SPBPJ4664.02	12815	278	0.0216933	0.322063	15428	284	0.0184081	0.195555	28805	0.239573	0.147908	0.925598	15157	416	0.0274461	0.144224	18930	418	0.0220814	0.170777	34921	0.124625	0.380142	1.01328
001_P07	SPAC14C4.11	SPAC14C4.11	33089	569	0.017196	-0.0131116	12842	246	0.0191559	0.253004	46746	0.0742277	0.383106	1.0553	23532	702	0.0298317	0.264472	12368	326	0.0263583	0.426208	36928	0.351584	0.111929	0.859395
001_P08	SPCC736.06	SPCC736.06	21788	382	0.0175326	0.0148503	14561	209	0.0143534	-0.163391	36940	-0.0518617	0.897005	1.01878	18971	422	0.0222445	-0.158928	16856	325	0.019281	-0.0248744	36574	-0.10614	0.851818	1.01611
001_P09	SPAC23G3.03	sib2	18568	319	0.0171801	-0.0144505	11911	164	0.0137688	-0.223383	30962	-0.0888966	0.905737	1.01553	15931	480	0.0301299	0.278822	12480	239	0.0191506	-0.0346593	29130	0.173341	0.3367	1.00658
001_P10	SPBC18H10.04C	sce3	1234	21	0.0170178	-0.0281416	1522	21	0.0137976	-0.220363	2798	-0.145291	0.324734	1.05047	1123	30	0.0267142	0.105229	1334	39	0.0292354	0.575664	2526	0.323498	0.816731	1.01744
001_P11	SPAC29B12.03	spd1	34669	655	0.018893	0.12266	12828	210	0.0163704	0.0263086	48362	0.11176	0.277875	1.03473	29649	737	0.0248575	0.00130572	14484	248	0.0171223	-0.196172	45118	-0.00793495	0.589884	1.03856
001_P12	SPAC23C4.03	hrk1	17064	240	0.0140647	-0.30311	14454	215	0.0148748	-0.111917	31973	-0.223414	0.440365	1.06757	15394	538	0.0349487	0.492863	14660	275	0.0187585	-0.0645054	30867	0.269497	0.203002	0.974162
001_P13	SPAC688.13	scn3	10899	241	0.0221121	0.349649	11149	214	0.0191945	0.255912	22503	0.292115	0.127751	0.883613	8419	274	0.0325454	0.39008	11421	311	0.0272305	0.473174	20425	0.393824	0.145673	0.924556
001_P14	SPAC105.02C	SPAC105.02C	2865	49	0.017103	-0.0209419	1634	24	0.0146879	-0.130158	4572	-0.0548121	0.524441	1.06236	2106	86	0.0408357	0.717456	1203	35	0.0290939	0.568666	3430	0.704339	0.201889	0.977766
001_P15	SPAPB24D3.09C	pdr1	1615	31	0.019195	0.145546	2191	27	0.0123231	-0.383415	3864	-0.145327	0.337478	1.04456	1047	26	0.0248329	-0.000125272	2253	45	0.0199734	0.0260257	3371	-0.0608479	0.550922	1.03726
001_P16	SPAC11D3.07C	toe4	14440	313	0.0216759	0.320903	12297	226	0.0183785	0.193232	27276	0.258344	0.13347	0.889985	9837	406	0.0412727	0.732814	13540	426	0.0314623	0.681574	24209	0.665293	0.0190681	0.461741
001_P17	SPBC16A3.08C	oga1	19297	333	0.0172566	-0.00804294	11863	207	0.0174492	0.118377	31700	0.04016	0.598576	1.06301	17340	505	0.0291234	0.229804	13233	231	0.0174564	-0.168299	31309	0.101247	0.441412	1.0527
001_P19	SPBC21B10.10	rps402	10781	201	0.0186439	0.103516	13147	231	0.0175705	0.128375	24360	0.0992273	0.499317	1.0506	8886	197	0.0221697	-0.163786	13724	255	0.0185806	-0.0782557	23062	-0.166839	0.888352	1.0125
001_P20	SPAC13C5.07	mre11	16382	248	0.0151386	-0.19696	22149	359	0.0162084	0.0119578	39138	-0.0974273	0.933192	1.01388	13829	301	0.0217659	-0.190309	16553	335	0.020238	0.0450164	31018	-0.100391	0.875075	1.01128
001_P21	SPBC2D10.06	rep1	10927	218	0.0199506	0.201242	34649	795	0.0229444	0.513357	46589	0.399184	0.00968926	0.275315	6231	226	0.0362703	0.546412	26514	784	0.0295693	0.592047	33755	0.458808	0.0597759	0.691818
001_P22	SPAC1556.03	azr1	12641	261	0.0206471	0.250751	33143	526	0.0158706	-0.0184258	46571	0.028416	0.529488	1.06234	10290	301	0.0292517	0.236145	25034	553	0.02209	0.171339	36178	0.107386	0.403018	1.03146
002_A01	SPAC1687.05	pli1	18453	415	0.0224896	0.309783	16507	335	0.0202944	0.283852	35710	0.308878	0.052921	0.664992	24953	851	0.0341041	0.530795	13374	327	0.0244504	0.125261	39505	0.414964	0.0706908	0.722515
002_A02	SPAC27E2.03C	SPAC27E2.03C	12988	185	0.0142439	-0.349127	13450	196	0.0145725	-0.193984	26819	-0.265129	0.310901	1.04763	11023	334	0.0303003	0.360181	10077	208	0.0206411	-0.119081	21642	0.156107	0.432039	1.04781
002_A03	SPAC1782.06C	phb1	22530	487	0.0216156	0.252601	14772	296	0.0200379	0.265501	38085	0.277452	0.0688592	0.728798	47391	1451	0.0306176	0.375212	13211	336	0.0254334	0.182123	62389	0.35516	0.0831112	0.756168
002_A04	SPAC30D11.01C	gto2	27257	438	0.0160693	-0.175169	22390	423	0.0188924	0.180572	50508	0.00199938	0.606062	1.06255	31495	836	0.0265439	0.169229	13607	304	0.0223414	-0.00487602	46242	0.132828	0.32657	1.01285
002_A05	SPAC17G6.02C	tco1	8644	165	0.0190884	0.0732217	24955	385	0.0154278	-0.111701	34149	-0.081294	0.963034	1.00743	17110	451	0.0263589	0.159137	20571	413	0.0200768	-0.159068	38545	-0.00774851	0.615684	1.0293
002_A06	SPAC343.04C	SPAC343.04C	22908	385	0.0168064	-0.110466	24514	394	0.0160724	-0.0526413	48201	-0.0762405	0.932045	1.01403	18309	392	0.0214102	-0.14085	14921	278	0.0186315	-0.266858	33900	-0.193268	0.921243	1.00872
002_A11	SPAC19B12.08	atg4	16971	276	0.016263	-0.157877	44786	646	0.0144242	-0.208745	62679	-0.214143	0.532297	1.06459	17614	440	0.0249801	0.0816303	41524	938	0.0225893	0.0110442	60516	0.015476	0.510825	1.03413
002_A13	SPAC1F7.11C	SPAC1F7.11C	67948	1191	0.0175281	-0.0498029	58386	923	0.0158086	-0.0765228	128448	-0.0495749	0.799536	1.03392	89525	2197	0.0245406	0.0560217	45851	867	0.0189091	-0.24552	138440	-0.0264983	0.678578	1.02552
002_A14	SPAC56F8.06C	alg10	11935	178	0.0149141	-0.282795	12882	245	0.0190188	0.190194	25240	-0.0229784	0.906316	1.01474	13053	383	0.0293419	0.313812	8190	212	0.0258852	0.207531	21838	0.28096	0.247329	0.996916
002_A15	SPAC227.03C	SPAC227.03C	25849	381	0.0147394	-0.299791	52289	866	0.0165618	-0.00937144	79385	-0.117942	0.937133	1.01293	30636	571	0.0186382	-0.340888	35945	679	0.01889	-0.246978	67831	-0.296197	0.746437	1.02031
002_A16	SPAC631.01C	acp2	46208	881	0.019066	0.071526	34038	621	0.0182443	0.130216	81748	0.112076	0.212849	0.994556	78767	1771	0.022484	-0.0702497	22970	554	0.0241184	0.105537	104062	-0.0125563	0.587332	1.0393
002_A17	SPAC22F8.04	pet1	1658	44	0.026538	0.548586	2290	44	0.019214	0.204925	4036	0.364074	0.488799	1.05377	1302	32	0.0245776	0.0581918	1237	43	0.0347615	0.632893	2614	0.357688	0.745646	1.02101
002_A18	SPAC6B12.04C	SPAC6B12.04C	16900	337	0.0199408	0.136252	34102	731	0.0214357	0.362784	52070	0.273979	0.0468114	0.622967	17868	474	0.0265279	0.168358	31832	736	0.0231214	0.0446296	50910	0.0787467	0.405216	1.02873
002_A19	SPAC23A1.07	SPAC23A1.07	10681	43	0.00402584	-2.17211	25609	423	0.0165176	-0.0132242	36756	--	--	0.158655	20028	457	0.0228181	-0.0489748	25946	596	0.0229708	0.0352019	47027	-0.00932723	0.587063	1.03941
002_A20	SPAC821.07C	moc3	14319	277	0.0193449	0.0924819	20379	436	0.0213946	0.360014	35411	0.246742	0.105873	0.849675	24008	777	0.0323642	0.455249	24316	725	0.0298158	0.411477	49826	0.43113	0.0539513	0.673963
002_A21	SPAC23G3.08C	ubp7	3722	53	0.0142397	-0.349559	64646	1073	0.0165981	-0.00621392	69494	-0.0724936	0.862304	1.0236	4972	145	0.0291633	0.305004	42001	719	0.0171186	-0.38903	47837	-0.325743	0.661453	1.02625
002_A22	SPAC890.03	ppk16	9012	31	0.00343986	-2.39905	57533	1034	0.0179723	0.108544	67610	--	--	0.158655	25826	809	0.031325	0.408165	42526	1077	0.0253257	0.176003	70238	0.259332	0.149584	0.928778
002_A23	SPAC26A3.10	cnt6	22348	469	0.0209862	0.209969	55399	1037	0.0187187	0.167253	79253	0.161556	0.12739	0.884994	23601	730	0.0309309	0.389898	34242	1011	0.0295251	0.397346	59584	0.384759	0.0688538	0.712999
002_A24	SPAC926.07C	dlc2	969	21	0.0216718	0.256347	19853	431	0.0217096	0.3811	21274	0.325907	0.101735	0.833435	1339	46	0.034354	0.541327	17123	731	0.0426911	0.929338	19239	0.868413	0.0050295	0.239892
002_B01	SPAP32A8.03C	bop1	25812	562	0.0217728	0.263055	13020	260	0.0199693	0.260551	39654	0.289585	0.0564468	0.682119	34785	1156	0.0332327	0.493454	10706	265	0.0247525	0.142974	46912	0.438311	0.0531827	0.686144
002_B02	SPBC31F10.12	tma20	9777	237	0.0242406	0.41795	7751	188	0.0242549	0.541047	17953	0.485494	0.0268944	0.504911	14485	315	0.0217466	-0.118359	9088	173	0.0190361	-0.235861	24061	-0.155197	0.927521	1.00269
002_B03	SPBC115.02C	afg1	13038	217	0.0166437	-0.124501	11376	212	0.0186357	0.16084	24843	0.0209616	0.750709	1.04767	14357	390	0.0271644	0.202569	10632	186	0.0174944	-0.357709	25565	-0.000166929	0.695312	1.02618
002_B04	SPBC336.03	efc25	11477	179	0.0155964	-0.218259	14278	213	0.0149181	-0.160171	26147	-0.186306	0.519688	1.05953	14378	266	0.0185005	-0.351587	11200	132	0.0117857	-0.927559	25976	-0.567078	0.196091	0.97828
002_B05	SPBC12C2.05C	bzz1	7942	146	0.0183833	0.0189208	13877	227	0.016358	-0.0272344	22192	-0.0187167	0.935991	1.01273	10274	287	0.0279346	0.242902	10461	191	0.0182583	-0.296046	21213	0	0.749868	1.01881
002_B06	SPBC354.15	fap1	21250	431	0.0202824	0.160752	12166	185	0.0152063	-0.132561	34032	0.090084	0.418632	1.06395	19653	464	0.0236096	0.000224598	9971	205	0.0205596	-0.124785	30293	-0.0297028	0.716539	1.02344
002_B07	SPBC14F5.13C	pho8	31854	497	0.0156024	-0.217702	14908	260	0.0174403	0.0651939	47519	-0.0973506	0.975843	1.00516	63129	1406	0.0222719	-0.0839289	11041	258	0.0233674	0.0599019	75834	-0.0391948	0.62265	1.02248
002_B08	SPBC428.15	SPBC428.15	22969	395	0.0171971	-0.0773087	15158	291	0.0191978	0.203709	38813	0.0550882	0.487727	1.05507	15978	342	0.0214044	-0.141241	9754	178	0.0182489	-0.296787	26252	-0.189995	0.868989	1.0113
002_B09	SPBC16G5.05C	scs2	13940	229	0.0164275	-0.143356	20620	364	0.0176528	0.0826631	35153	-0.0133784	0.760407	1.04548	16455	376	0.0228502	-0.046944	11103	257	0.0231469	0.0462205	28191	-0.00520826	0.68018	1.02401
002_B10	SPBC557.04	ppk29	29946	464	0.0154946	-0.227712	31439	524	0.0166672	-0.000219502	62373	-0.105682	0.980705	1.00329	21622	422	0.0195172	-0.274408	20334	361	0.0177535	-0.336494	42739	-0.304807	0.696559	1.02562
002_B11	SPBC17A3.10	pas4	15148	286	0.0188804	0.0574145	48635	802	0.0164902	-0.0156237	64871	-0.0218726	0.654705	1.05516	17800	334	0.018764	-0.33118	32062	516	0.0160938	-0.478092	50712	-0.43542	0.43929	1.05162
002_B12	SPBC660.10	SPBC660.10	33213	531	0.0159877	-0.18251	26427	523	0.0197904	0.247567	60694	0.0292154	0.474078	1.05895	39713	879	0.0221338	-0.0928988	19875	498	0.0250566	0.160593	60965	0.00349226	0.534972	1.03764
002_B14	SPBC800.04C	rpl4301	12436	344	0.0276616	0.608413	27255	720	0.0264172	0.664245	40755	0.630307	0.000230152	0.0172834	8783	355	0.040419	0.775883	14814	743	0.0501553	1.1618	24695	1.01326	0.000703023	0.0790399
002_B15	SPBC19G7.04	SPBC19G7.04	41729	850	0.0203695	0.166939	36675	742	0.0202318	0.279391	79996	0.229534	0.0552467	0.678008	45948	1220	0.0265518	0.169657	20813	589	0.0282996	0.336184	68570	0.233172	0.174973	0.956278
002_B17	SPBC21B10.03C	ath1	10606	189	0.0178201	-0.0259677	7762	140	0.0180366	0.113696	18697	0.0485857	0.762002	1.04585	9592	317	0.0330484	0.485429	6398	237	0.0370428	0.724596	16544	0.587773	0.0572755	0.685563
002_B18	SPBP22H7.05C	abo2	25626	460	0.0179505	-0.0154478	27723	448	0.0161599	-0.0448156	54257	-0.0250762	0.69631	1.05382	19255	379	0.0196832	-0.262186	17243	365	0.021168	-0.0827127	37242	-0.177457	0.978603	1.00412
002_B19	SPBC25B2.03	SPBC25B2.03	36411	795	0.0218341	0.267107	22647	501	0.0221221	0.40826	60354	0.341554	0.0149003	0.358744	46523	1139	0.0244825	0.0526011	26119	616	0.0235844	0.0732324	74397	0.0676526	0.404901	1.03042
002_B20	SPBPB2B2.05	SPBPB2B2.05	34686	767	0.0221127	0.2854	18707	383	0.0204736	0.296535	54543	0.314604	0.0255675	0.491706	39069	928	0.0237528	0.00894982	20096	500	0.0248806	0.150421	60593	0.0662375	0.413513	1.03559
002_B21	SPBC29A10.09C	tri1	23723	47	0.0019812	-3.19503	46630	758	0.0162556	-0.0362916	71158	--	--	0.158655	34967	743	0.0212486	-0.151782	43755	869	0.0198606	-0.17469	80334	-0.17093	0.945329	1.00401
002_B22	SPCC1183.04C	pet127	40658	871	0.0214226	0.23966	36370	772	0.0212263	0.348621	78671	0.30057	0.0203684	0.434067	45364	1094	0.024116	0.0308423	21252	497	0.023386	0.0610489	68207	0.0510506	0.436427	1.04956
002_B23	SPBC2F12.11C	rep2	27617	742	0.0268675	0.566389	55591	1158	0.0208307	0.321481	85108	0.398898	0.00357707	0.139285	39332	1182	0.0300519	0.348304	75012	1814	0.0241828	0.109383	117340	0.184714	0.24839	0.997361
002_B24	SPCC126.06	twf1	4570	105	0.0229759	0.34065	19080	349	0.0182914	0.133935	24104	0.148545	0.367747	1.05828	1437	49	0.0340988	0.530571	20363	543	0.026666	0.250404	22392	0.236326	0.299686	1.01442
002_C01	SPAC1687.06C	rpl44	20655	454	0.0219802	0.276728	15357	267	0.0173862	0.0607123	36733	0.209214	0.147035	0.923802	26584	911	0.0342687	0.537742	11663	244	0.0209209	-0.0996561	39402	0.389532	0.0839133	0.756903
002_C02	SPAC27F1.06C	SPAC27F1.06C	14070	270	0.0191898	0.0808637	10556	193	0.0182834	0.133307	25089	0.118523	0.433695	1.06782	12125	331	0.027299	0.209696	8197	189	0.0230572	0.04062	20842	0.150527	0.451727	1.05025
002_C03	SPAC17A2.05	osm1	26868	544	0.0202471	0.158244	24035	386	0.0160599	-0.0537669	51833	0.0771727	0.353573	1.06005	48384	1189	0.0245742	0.0579961	27454	553	0.0201428	-0.154335	77580	-0.00519077	0.548552	1.03714
002_C04	SPAC31G5.19	abo1	5314	115	0.0216409	0.25429	8569	206	0.0240401	0.528215	14204	0.416947	0.0860137	0.790925	9173	239	0.0260547	0.142394	10063	357	0.0354765	0.662265	19832	0.426561	0.124692	0.886074
002_C05	SPAC17G6.05C	bro1	21657	438	0.0202244	0.156624	14074	255	0.0181185	0.120234	36424	0.163372	0.225067	1.00976	44908	1148	0.0255634	0.114928	9717	323	0.0332407	0.568353	56096	0.224221	0.192037	0.981383
002_C06	SPAC3A11.09	sod22	18014	293	0.0162651	-0.157691	16583	269	0.0162214	-0.0393298	35159	-0.0923841	0.926622	1.01584	24085	534	0.0221715	-0.0904458	11198	185	0.0165208	-0.440314	36002	-0.177924	0.970818	1.00366
002_C07	SPAC1805.09C	fmt1	39358	674	0.0171249	-0.0833817	32594	507	0.015555	-0.0998516	73133	-0.077405	0.880748	1.02505	36821	841	0.0228402	-0.0475737	36167	606	0.0167556	-0.419954	74435	-0.217609	0.939459	1.0049
002_C10	SPAC3H1.06C	SPAC3H1.06C	30119	545	0.0180949	-0.00389097	35696	562	0.0157441	-0.0824233	66922	-0.0421404	0.734505	1.05206	57231	1239	0.0216491	-0.124843	30261	507	0.0167542	-0.420072	89238	-0.208112	0.950854	1.00345
002_C11	SPAC19B12.10	sst2	17698	308	0.0174031	-0.0601293	36511	582	0.0159404	-0.064543	55099	-0.0770344	0.910696	1.0146	13433	414	0.0308196	0.384699	19915	478	0.024002	0.0985568	34240	0.214501	0.252329	0.999159
002_C12	SPAC4F8.11	SPAC4F8.11	29967	510	0.0170187	-0.0923507	40594	578	0.0142386	-0.227428	71649	-0.167572	0.7179	1.05265	30097	656	0.0217962	-0.115075	30014	433	0.0144266	-0.635867	61200	-0.34764	0.626277	1.02151
002_C13	SPAC1F8.01	ght3	25183	475	0.0188619	0.056004	996	14	0.0140562	-0.246022	26668	0.109117	0.43983	1.06792	27881	635	0.0227754	-0.0516764	722	32	0.0443213	0.983403	29270	0.0165777	0.623526	1.02179
002_C14	SPAC56F8.09	rrp8	9101	149	0.0163718	-0.148258	558	6	0.0107527	-0.632534	9814	-0.109985	0.529289	1.0633	9028	208	0.0230394	-0.0350454	322	17	0.052795	1.2358	9575	0.0619442	0.892191	1.01467
002_C15	SPAC227.05	SPAC227.05	46	2	0.0434783	1.26082	46774	682	0.0145807	-0.193166	47504	-0.245436	0.415143	1.06539	20101	378	0.018805	-0.328032	25792	506	0.0196185	-0.192385	46777	-0.25917	0.814926	1.01761
002_C16	SPAC637.07	moe1	9668	151	0.0156185	-0.216214	37046	538	0.0145225	-0.198943	47403	-0.231658	0.457996	1.05903	11281	213	0.0188813	-0.322192	34355	613	0.0178431	-0.329231	46462	-0.348973	0.607289	1.03562
002_C17	SPAC22F8.11	plc1	59	0	0	--	1413	26	0.0184006	0.142519	1498	0.0284266	0.606416	1.06258	1253	32	0.0255387	0.113535	610	34	0.0557377	1.31406	1929	0.619896	0.409829	1.03294
002_C18	SPAC6B12.07C	SPAC6B12.07C	33084	619	0.01871	0.0443324	29948	558	0.0186323	0.160574	64209	0.108651	0.241505	1.02243	36449	830	0.0227715	-0.0519186	39148	694	0.0177276	-0.338601	77121	-0.193481	0.99938	0.999697
002_C19	SPAC23C4.02	crn1	34688	640	0.0184502	0.0241619	32405	516	0.0159235	-0.0660764	68249	-0.00740007	0.591338	1.06272	45153	1002	0.0221912	-0.0891619	33935	554	0.0163253	-0.457486	80644	-0.228631	0.907466	1.01086
002_C20	SPAC823.03	ppk15	7427	179	0.0241013	0.409635	30865	612	0.0198283	0.250329	39083	0.254327	0.0858792	0.791997	11416	329	0.0288192	0.28788	25861	644	0.0249024	0.151684	38250	0.179211	0.283162	1.03171
002_C21	SPAC23H3.03C	npr2	13848	310	0.0223859	0.303117	28253	551	0.0195024	0.226417	42962	0.239851	0.089219	0.797157	15084	482	0.0319544	0.436863	34535	969	0.0280585	0.323839	51070	0.34314	0.0972003	0.803115
002_C22	SPAC8C9.11	fra2	37956	662	0.0174412	-0.0569701	22997	373	0.0162195	-0.039501	61988	-0.0284457	0.687521	1.05778	36225	839	0.0231608	-0.0274655	62989	1275	0.0202416	-0.147273	101328	-0.113583	0.824537	1.0187
002_C23	SPAC26A3.16	dph1	43	1	0.0232558	0.358118	39613	783	0.0197662	0.245807	40440	0.191007	0.15788	0.952109	29571	1010	0.0341551	0.53295	15433	386	0.0250113	0.157984	46400	0.428231	0.057561	0.686372
002_C24	SPAC977.15	SPAC977.15	25098	520	0.0207188	0.191466	39322	702	0.0178526	0.0989033	65642	0.131356	0.192122	0.994998	23551	714	0.0303172	0.360985	22063	777	0.0352173	0.651687	47105	0.503789	0.0325104	0.547287
002_D01	SPAPB1A10.03	nxt1	42394	709	0.0167241	-0.117548	12793	209	0.0163371	-0.0290827	56105	-0.0581416	0.826889	1.03247	43036	1304	0.0303002	0.360177	9467	242	0.0255625	0.18943	54049	0.353126	0.0887469	0.776042
002_D02	SPBC31F10.16	SPBC31F10.16	12008	197	0.0164057	-0.145274	11097	165	0.0148689	-0.164935	23467	-0.144523	0.630678	1.05638	15291	309	0.020208	-0.224227	7663	178	0.0232285	0.0512977	23441	-0.119766	0.996323	1.00045
002_D03	SPBC119.04	mei3	26097	500	0.0191593	0.0785708	11824	199	0.0168302	0.0138193	38620	0.0899881	0.384235	1.05564	21444	685	0.0319437	0.436379	10976	298	0.0271501	0.276362	33403	0.395365	0.0919052	0.779832
002_D04	SPBC336.14C	ppk26	35863	801	0.022335	0.299833	7903	151	0.0191067	0.196845	44718	0.328844	0.0285879	0.518197	32845	1006	0.0306287	0.375734	6315	224	0.0354711	0.662046	40390	0.446263	0.0559651	0.688196
002_D05	SPBC12D12.06	srb11	18079	369	0.0204104	0.169833	7411	149	0.0201052	0.270341	26008	0.230713	0.181413	0.976408	19096	431	0.0225702	-0.0647333	6062	176	0.0290333	0.373111	25765	0.0657367	0.554547	1.03726
002_D08	SPBC4B4.04	SPBC4B4.04	34991	522	0.0149181	-0.282407	36664	564	0.0153829	-0.1159	72741	-0.192422	0.615624	1.06161	26020	592	0.0227517	-0.0531744	21749	326	0.0149892	-0.580675	48687	-0.262523	0.811239	1.02192
002_D09	SPBC16G5.16	SPBC16G5.16	27633	439	0.0158868	-0.191645	18467	308	0.0166784	0.00074985	46847	-0.0959658	0.978882	1.00338	34211	852	0.0249043	0.0772425	18307	478	0.0261102	0.220017	53848	0.1356	0.307787	1.01563
002_D10	SPBC577.03C	SPBC577.03C	92651	1372	0.0148083	-0.293071	93158	1348	0.01447	-0.204162	188529	-0.242521	0.249046	1.02813	54056	1003	0.0185548	-0.347356	36142	580	0.0160478	-0.482222	91781	-0.393449	0.508213	1.03483
002_D11	SPBC17D1.06	dbp3	29408	429	0.0145879	-0.314704	40833	592	0.0144981	-0.201369	71262	-0.25271	0.399647	1.06191	40421	773	0.0191237	-0.303787	28146	447	0.0158815	-0.497253	69787	-0.373648	0.568803	1.03682
002_D12	SPBC660.12C	egt2	40817	671	0.0164392	-0.142331	39275	584	0.0148695	-0.164874	81347	-0.14435	0.817015	1.03198	42675	824	0.0193087	-0.289897	21919	320	0.0145992	-0.618708	65738	-0.380328	0.555424	1.03644
002_D13	SPBC18H10.13	rps1402	8643	115	0.0133056	-0.447444	40670	635	0.0156135	-0.0944394	50063	-0.187385	0.617635	1.05986	9525	230	0.024147	0.0326922	23928	582	0.024323	0.117721	34265	0.0744016	0.472397	1.04358
002_D14	SPBC83.05	SPBC83.05	51616	927	0.0179595	-0.0147223	44645	703	0.0157464	-0.0822049	97891	-0.0324587	0.682275	1.06057	36717	814	0.0221696	-0.09057	55990	820	0.0146455	-0.614144	94341	-0.387285	0.51775	1.03814
002_D15	SPBC19G7.10C	SPBC19G7.10C	6465	153	0.0236659	0.383336	4951	84	0.0169663	0.0254384	11653	0.261523	0.352283	1.05819	6641	283	0.0426141	0.852179	11613	336	0.0289331	0.368122	18873	0.556784	0.0590858	0.686355
002_D16	SPBC9B6.03	SPBC9B6.03	55424	945	0.0170504	-0.0896698	74424	1232	0.0165538	-0.0100686	132025	-0.0467897	0.793236	1.03683	42005	879	0.0209261	-0.173849	37891	770	0.0203214	-0.141595	81545	-0.159546	0.917314	1.01004
002_D17	SPBC21B10.04C	nrf1	34609	706	0.0203993	0.169048	52620	934	0.0177499	0.0905803	88869	0.118509	0.195713	0.997217	41950	1047	0.0249583	0.0803681	34594	740	0.021391	-0.0675949	78331	0.0182359	0.50005	1.03699
002_D18	SPBP35G2.06C	nup131	30275	523	0.017275	-0.0707893	23093	351	0.0151994	-0.133216	54242	-0.080649	0.928843	1.0158	29399	563	0.0191503	-0.301783	20081	290	0.0144415	-0.634377	50333	-0.419242	0.469327	1.04339
002_D19	SPBC25B2.04C	mtg1	34298	694	0.0202344	0.157338	60887	1010	0.0165881	-0.00708183	96889	0.0478119	0.377064	1.059	22175	460	0.0207441	-0.186451	26772	468	0.017481	-0.358815	49875	-0.282038	0.766801	1.01938
002_D20	SPBPB2B2.10C	gal7	3945	75	0.0190114	0.067392	10042	171	0.0170285	0.0307187	14233	0.0222644	0.956663	1.01116	9822	168	0.0171045	-0.464778	7927	174	0.0219503	-0.0303579	18091	-0.258684	0.619311	1.02448
002_D21	SPBC29A10.14	rec8	12838	237	0.0184608	0.0249933	25026	400	0.0159834	-0.0606587	38501	-0.0418408	0.845255	1.02773	19243	361	0.0187601	-0.331486	18654	418	0.0224081	-0.000580398	38676	-0.165403	0.984788	1.00262
002_D22	SPCC11E10.07C	SPCC11E10.07C	4746	109	0.0229667	0.340071	11836	232	0.0196012	0.233712	16923	0.247846	0.261721	1.03963	6765	275	0.0406504	0.784119	10974	468	0.0426463	0.927821	18482	0.861495	0.00579145	0.26045
002_D23	SPBC2F12.12C	cay1	13455	611	0.0454106	1.32356	11153	420	0.037658	1.17573	25639	1.27454	3.52179e-10	7.93409e-08	14085	1087	0.0771743	1.70897	12847	873	0.0679536	1.59995	28892	1.65852	5.89358e-08	9.2765e-05
002_D24	SPCC126.12	SPCC126.12	30361	573	0.0188729	0.0568425	26362	435	0.016501	-0.0146754	57731	0.0371826	0.455635	1.06214	21926	622	0.0283681	0.265121	20828	520	0.0249664	0.155389	43896	0.212489	0.224326	0.989046
002_E01	SPAC1687.15	gsk3	38259	721	0.0188452	0.0547268	19587	345	0.0176137	0.0794689	58912	0.089611	0.298604	1.04066	36633	1144	0.0312287	0.403721	13636	390	0.0286008	0.351455	51803	0.404615	0.0637513	0.70171
002_E02	SPAC29A4.02C	SPAC29A4.02C	27428	466	0.0169899	-0.0947928	21898	321	0.0146589	-0.185457	50113	-0.118292	0.896773	1.01925	38024	909	0.023906	0.0182193	14409	248	0.0172115	-0.381228	53590	-0.0631007	0.691508	1.02537
002_E03	SPAC17A2.06C	vps8	22603	511	0.0226076	0.317336	16867	265	0.0157112	-0.085442	40246	0.182993	0.171215	0.971244	29548	885	0.0299513	0.343466	20357	747	0.036695	0.710985	51537	0.504442	0.030416	0.553465
002_E04	SPAC328.01C	msn5	18539	320	0.0172609	-0.0719649	11846	182	0.0153638	-0.117693	30887	-0.0679792	0.98675	1.00071	13682	337	0.0246309	0.0613188	5916	203	0.0343137	0.614187	20138	0.25731	0.29419	1.01547
002_E05	SPAC17G6.13	slt1	31993	567	0.0177226	-0.0338809	40024	601	0.015016	-0.150731	73185	-0.0946764	0.958433	1.00932	32589	712	0.0218479	-0.111658	19052	421	0.0220974	-0.0207205	52774	-0.0713836	0.712273	1.02573
002_E06	SPAC3A12.03C	meu34	22514	371	0.0164786	-0.138877	39605	558	0.0140891	-0.242648	63048	-0.211663	0.541482	1.06143	12183	299	0.0245424	0.0561254	19328	463	0.0239549	0.0957215	32273	0.0689929	0.494882	1.03859
002_E07	SPAC1805.12C	uep1	36257	607	0.0167416	-0.116036	14982	258	0.0172207	0.0469099	52104	-0.0368495	0.751867	1.04559	20911	528	0.0252499	0.0971252	9930	156	0.01571	-0.512918	31525	-0.0557958	0.76639	1.01926
002_E08	SPAC3F10.06C	rit1	35945	632	0.0175824	-0.0453399	12265	192	0.0156543	-0.0906719	49034	-0.0189954	0.693193	1.05416	35002	852	0.0243415	0.0442654	9895	174	0.0175846	-0.350283	45923	-0.0126028	0.597366	1.03495
002_E09	SPAC1952.16	rga9	40213	717	0.0178301	-0.0251622	54812	953	0.0173867	0.0607535	96695	0.0211618	0.467654	1.05582	34573	796	0.0230237	-0.036028	33648	678	0.0201498	-0.153834	69695	-0.0934939	0.748986	1.01937
002_E10	SPAC3H1.10	pcs2	38357	662	0.0172589	-0.072132	60652	962	0.015861	-0.0717493	100633	-0.0783873	0.892801	1.02136	69001	1328	0.0192461	-0.294585	35295	691	0.0195778	-0.195376	106315	-0.251985	0.81348	1.02025
002_E11	SPAC19B12.11C	SPAC19B12.11C	51996	571	0.0109816	-0.724383	87663	1121	0.0127876	-0.382485	141351	-0.515486	0.00807882	0.25738	56033	906	0.016169	-0.545916	68416	1082	0.015815	-0.503303	126437	-0.529179	0.234753	0.989294
002_E12	SPAC4G8.04	SPAC4G8.04	48021	831	0.0173049	-0.0682903	60865	979	0.0160848	-0.051535	110696	-0.0591361	0.815258	1.03225	37265	823	0.0220851	-0.0960795	52392	1031	0.0196786	-0.187972	91511	-0.156789	0.92052	1.00933
002_E13	SPAC20G8.08C	fft1	46205	776	0.0167947	-0.111466	70602	976	0.013824	-0.270059	118559	-0.207431	0.498082	1.0501	51166	1242	0.0242739	0.0402572	48184	910	0.0188859	-0.247286	101502	-0.0898564	0.765727	1.01967
002_E14	SPAC57A10.03	cyp1	30689	527	0.0171723	-0.079392	20866	332	0.0159111	-0.0672018	52414	-0.0557615	0.829067	1.03192	32332	972	0.0300631	0.348843	15541	393	0.0252879	0.173852	49238	0.306674	0.124451	0.888373
002_E15	SPAC227.10	SPAC227.10	96	2	0.0208333	0.19942	8785	163	0.0185544	0.154527	9046	0.101365	0.87551	1.02386	91222	2124	0.0232839	-0.0198206	11252	232	0.0206186	-0.120655	104830	-0.00386094	0.569138	1.03623
002_E16	SPAC644.14C	rad51	3094	115	0.0371687	1.03462	7864	237	0.0301373	0.854321	11310	0.891284	0.000575289	0.0348935	2357	66	0.0280017	0.246364	3105	158	0.0508857	1.18266	5686	0.831055	0.0590091	0.69056
002_E17	SPAC22G7.02	kap111	87	1	0.0114943	-0.658561	12533	303	0.0241762	0.536355	12924	0.476052	0.0594197	0.704548	11856	295	0.0248819	0.0759469	9353	213	0.0227734	0.022754	21717	0.0552093	0.623669	1.02149
002_E18	SPAC6F12.12	par2	7730	139	0.0179819	-0.0129288	25023	366	0.0146265	-0.188642	33258	-0.167651	0.627498	1.05779	12210	264	0.0216216	-0.126676	32676	514	0.0157302	-0.511061	45664	-0.411438	0.477649	1.04419
002_E19	SPAC23D3.01	pdp3	44256	787	0.0177829	-0.0289828	52787	856	0.0162161	-0.0398029	98686	-0.0326709	0.683705	1.05966	20912	437	0.0208971	-0.175848	26245	546	0.020804	-0.10774	48140	-0.145223	0.900793	1.01347
002_E20	SPAC823.13C	SPAC823.13C	24825	516	0.0207855	0.196104	55864	926	0.016576	-0.00813767	82131	0.0453199	0.388895	1.05648	21353	489	0.0229008	-0.043755	35845	710	0.0198075	-0.178551	58397	-0.137148	0.862135	1.01043
002_E21	SPAC24B11.08C	SPAC24B11.08C	10844	168	0.0154924	-0.227909	68434	1134	0.0165707	-0.00859552	80580	-0.0765703	0.873853	1.02458	13709	299	0.0218105	-0.114129	41630	705	0.0169349	-0.404599	56343	-0.345552	0.628307	1.02059
002_E22	SPAC8C9.12C	SPAC8C9.12C	34906	722	0.0206841	0.18905	17677	305	0.0172541	0.0497048	53610	0.173461	0.144225	0.911595	25674	626	0.0243826	0.0467039	23263	534	0.0229549	0.0342043	50097	0.0401847	0.478262	1.04119
002_E23	SPAC26F1.02	pnn1	92	1	0.0108696	-0.739179	13275	236	0.0177778	0.092844	13604	0.033904	0.934846	1.01358	43026	987	0.0229396	-0.0413093	9933	274	0.0275848	0.299276	54220	0.0466779	0.457872	1.04676
002_E24	SPAC9G1.05	aip1	39715	688	0.0173234	-0.0667488	22082	387	0.0175256	0.0722317	62872	0.00642064	0.549695	1.05909	39554	1306	0.0330182	0.484109	12326	399	0.0323706	0.530086	53585	0.511579	0.0280571	0.53207
002_F01	SPAPB1A11.04C	mca1	37322	889	0.0238197	0.392684	12800	262	0.0204688	0.296192	51273	0.407065	0.00706589	0.232144	55780	1986	0.0356042	0.592895	8860	271	0.0305869	0.448316	66897	0.598965	0.0119405	0.368518
002_F02	SPBC32C12.03C	ppk25	22095	424	0.0191899	0.080871	14875	248	0.0166723	0.000219468	37642	0.0697989	0.450158	1.06511	21887	591	0.0270023	0.193933	9092	156	0.0171579	-0.385722	31726	0.0648751	0.506476	1.03532
002_F04	SPBC337.03	rhn1	18855	296	0.0156988	-0.208823	12080	187	0.0154801	-0.106813	31418	-0.149524	0.680512	1.06307	11948	282	0.0236023	-0.000224633	3189	97	0.0304171	0.440282	15516	0.119176	0.599513	1.03469
002_F05	SPBC1347.03	meu14	30850	723	0.023436	0.369252	18606	316	0.0169838	0.0269256	50495	0.278671	0.0458933	0.618579	30783	726	0.0235844	-0.00131494	19079	453	0.0237434	0.0829272	51041	0.0366085	0.48317	1.04108
002_F06	SPBC36.07	elp1	14862	304	0.0204549	0.17297	28898	511	0.0176829	0.0851227	44575	0.10488	0.310918	1.04657	9580	254	0.0265136	0.16758	9746	258	0.0264724	0.239891	19838	0.200658	0.380769	1.01067
002_F08	SPBC4B4.10C	atg5	15831	297	0.0187607	0.0482372	12709	202	0.0158942	-0.0687262	29039	0.0137472	0.721437	1.05392	10277	287	0.0279264	0.242481	8429	211	0.0250326	0.159211	19204	0.207702	0.377938	1.01514
002_F09	SPBC16H5.08C	SPBC16H5.08C	18887	288	0.0152486	-0.250798	58127	733	0.0126103	-0.402626	78035	-0.385517	0.107327	0.850522	29962	749	0.0249983	0.0826811	38153	711	0.0186355	-0.266545	69575	-0.105019	0.776899	1.01946
002_F10	SPBC577.13	syj2	21454	378	0.0176191	-0.0423338	79883	1322	0.0165492	-0.0104692	103037	-0.0459336	0.745861	1.04786	24269	611	0.0251762	0.0929071	51520	887	0.0172166	-0.380797	77287	-0.221965	0.926846	1.00299
002_F11	SPBC17D1.07C	npg1	14655	292	0.0199249	0.135102	71806	1094	0.0152355	-0.129795	87847	-0.111501	0.963524	1.00661	16339	416	0.0254606	0.109113	51569	866	0.016793	-0.416735	69190	-0.2882	0.765514	1.02025
002_F12	SPBC685.06	rps001	36929	605	0.0163828	-0.147292	69631	1090	0.0156539	-0.0907045	108255	-0.122688	0.887064	1.02334	42859	913	0.0213024	-0.148134	37353	608	0.0162771	-0.461751	81733	-0.281812	0.773663	1.02032
002_F13	SPBC19C2.10	SPBC19C2.10	28066	538	0.0191691	0.0793094	49629	701	0.0141248	-0.239	78934	-0.119025	0.932243	1.01355	48836	1137	0.023282	-0.0199353	34485	737	0.0213716	-0.0689027	85195	-0.0355737	0.619075	1.02571
002_F14	SPBC83.17	SPBC83.17	58756	936	0.0159303	-0.187701	27274	434	0.0159126	-0.0670622	87400	-0.121043	0.919656	1.01526	35104	840	0.0239289	0.0196032	12673	349	0.0275389	0.296871	48966	0.110418	0.355652	1.00322
002_F15	SPBC20F10.06	mad2	25010	388	0.0155138	-0.225922	15967	304	0.0190393	0.191747	41669	-0.0363496	0.80188	1.03356	20434	348	0.0170304	-0.471035	10425	172	0.0164988	-0.442237	31379	-0.452122	0.366528	1.00596
002_F16	SPBC9B6.07	nop52	11791	281	0.0238317	0.393411	2907	95	0.0326797	0.971165	15074	0.562805	0.0169606	0.390466	4227	134	0.031701	0.425376	863	25	0.0289687	0.369897	5249	0.438347	0.405459	1.02851
002_F18	SPBP35G2.10	mit1	52010	943	0.0181311	-0.0010046	60168	1031	0.0171354	0.039745	114152	0.0230249	0.470637	1.05801	56812	1111	0.0195557	-0.271559	23784	368	0.0154726	-0.534884	82075	-0.329101	0.660413	1.02564
002_F19	SPBC25H2.05	egd2	29372	547	0.0186232	0.037626	71830	1285	0.0178895	0.101879	103034	0.0638744	0.328858	1.05088	19621	469	0.023903	0.0180387	38043	816	0.0214494	-0.0636602	58949	-0.048917	0.65112	1.01976
002_F20	SPBPB2B2.11	SPBPB2B2.11	65617	1291	0.0196748	0.116874	51849	963	0.0185732	0.155989	119720	0.147937	0.14203	0.903152	31311	648	0.0206956	-0.189826	48818	1025	0.0209964	-0.0944595	81802	-0.142902	0.875386	1.0109
002_F21	SPBC29A3.05	vps71	34091	1172	0.0343786	0.922036	38706	1260	0.0325531	0.965564	75229	0.947885	2.10287e-09	4.14529e-07	28533	848	0.02972	0.332282	31708	731	0.0230541	0.0404262	61820	0.185251	0.231957	0.989432
002_F22	SPCC11E10.08	rik1	35854	708	0.0197468	0.122142	23533	457	0.0194195	0.220278	60552	0.179804	0.122314	0.872802	28370	579	0.0204089	-0.209953	31059	640	0.0206059	-0.121538	60648	-0.168483	0.938078	1.00547
002_F23	SPBC30B4.02C	SPBC30B4.02C	37436	700	0.0186986	0.0434553	23005	417	0.0181265	0.120869	61558	0.0937224	0.282002	1.03423	25186	528	0.020964	-0.171235	15020	300	0.0199734	-0.166521	41034	-0.162723	0.967694	1.00306
002_F24	SPCC132.02	hst2	27249	542	0.0198906	0.132616	19459	405	0.020813	0.320253	47655	0.227387	0.0907003	0.801313	36891	940	0.0254805	0.110241	11986	420	0.0350409	0.644441	50237	0.271436	0.152408	0.929808
002_G01	SPAC16A10.02	sub1	39875	870	0.0218182	0.266058	43815	979	0.0223439	0.422653	85539	0.351311	0.008312	0.25702	46102	1284	0.0278513	0.238593	38326	737	0.0192298	-0.221257	86449	0.0543333	0.432919	1.04833
002_G02	SPAC29A4.13	SPAC29A4.13	28168	523	0.0185672	0.0332805	31005	556	0.0179326	0.105353	60252	0.0743766	0.335716	1.04629	40695	992	0.0243765	0.0463379	20177	402	0.0199237	-0.170115	62266	-0.00956268	0.561262	1.03567
002_G03	SPAC17A2.12	rrp1	40928	764	0.0186669	0.0410111	12497	198	0.0158438	-0.0733124	54387	0.0562146	0.405796	1.06568	36786	887	0.0241124	0.0306266	11179	248	0.0221845	-0.0150493	49100	0.0376958	0.485391	1.0423
002_G04	SPAC328.04	SPAC328.04	12808	315	0.024594	0.438833	14408	303	0.02103	0.335217	27834	0.390844	0.0313733	0.543689	9637	259	0.0268756	0.187145	5583	168	0.0300913	0.42475	15647	0.283325	0.318185	1.0169
002_G05	SPAC17G8.07	yaf9	27823	827	0.0297236	0.712136	29636	771	0.0260157	0.642149	59057	0.683355	1.71224e-05	0.00168763	24516	849	0.0346304	0.55289	19335	666	0.0344453	0.619709	45366	0.583694	0.0175705	0.480973
002_G06	SPAC3A12.06C	SPAC3A12.06C	28961	449	0.0155036	-0.226869	44095	633	0.0143554	-0.215641	74138	-0.225681	0.489198	1.05248	39965	842	0.0210684	-0.164068	36328	617	0.0169841	-0.40041	77752	-0.269585	0.807058	1.02156
002_G07	SPAC1834.03C	hhf1	39599	700	0.0176772	-0.0375824	64011	922	0.0144038	-0.210784	105232	-0.145697	0.784843	1.03747	34570	822	0.0237778	0.0104671	43221	820	0.0189723	-0.240707	79433	-0.127164	0.834259	1.01832
002_G08	SPAC3F10.11C	abc2	32192	631	0.0196011	0.111464	25617	441	0.0172151	0.0464461	58881	0.0986316	0.276262	1.03361	31593	778	0.0246257	0.0610146	11431	209	0.0182836	-0.294047	44011	-0.00703415	0.591655	1.03704
002_G09	SPAC19A8.03	ymr1	53202	918	0.017255	-0.0724597	70449	927	0.0131585	-0.341241	125496	-0.21496	0.4565	1.0618	42506	843	0.0198325	-0.251285	35821	624	0.0174199	-0.363858	79794	-0.299655	0.732067	1.02107
002_G10	SPAC3H1.13	ppk13	45931	784	0.0170691	-0.0880879	71004	1166	0.0164216	-0.0216354	118885	-0.05454	0.8061	1.03267	24590	596	0.0242375	0.0380899	30943	596	0.0192612	-0.218899	56725	-0.102976	0.780696	1.01934
002_G12	SPAC4G9.02	rnh201	1443	218	0.151074	3.05771	164	9	0.054878	1.719	1834	3.02794	1.50014e-14	7.88576e-12	691	128	0.185239	2.97216	144	4	0.0277778	0.309333	967	--	--	0.158655
002_G13	SPAC20H4.02	dsc3	44426	774	0.0174222	-0.058544	65743	1069	0.0162603	-0.0358783	112012	-0.0499696	0.774652	1.03968	51522	1091	0.0211754	-0.15676	31219	518	0.0165925	-0.434071	84350	-0.245453	0.861491	1.01118
002_G14	SPAC57A7.05	SPAC57A7.05	36545	637	0.0174306	-0.057854	57801	814	0.0140828	-0.243297	95797	-0.171293	0.684626	1.059	26200	500	0.019084	-0.306789	29849	475	0.0159134	-0.494353	57024	-0.406229	0.50026	1.03675
002_G15	SPAC22A12.14C	SPAC22A12.14C	89	1	0.011236	-0.691351	63580	920	0.01447	-0.20417	64590	-0.259697	0.380309	1.05496	23844	517	0.0216826	-0.122613	47988	758	0.0157956	-0.505074	73107	-0.377144	0.559819	1.03483
002_G16	SPAC664.01C	swi6	50344	943	0.0187311	0.0459646	43076	674	0.0156468	-0.0913667	95037	-0.000790985	0.550044	1.05783	66830	1353	0.0202454	-0.221557	43058	701	0.0162804	-0.461465	111942	-0.30254	0.679667	1.02471
002_G17	SPAC22G7.08	ppk8	101	2	0.019802	0.126171	75278	1190	0.0158081	-0.0765696	76571	-0.131158	0.877399	1.02455	70874	1497	0.021122	-0.160405	52168	1087	0.0208365	-0.105483	125626	-0.134487	0.922318	1.0071
002_G18	SPAC6G9.04	spo7	46570	800	0.0171784	-0.0788742	76294	1116	0.0146276	-0.188535	124780	-0.151272	0.722332	1.05376	25489	544	0.0213425	-0.145419	29309	507	0.0172984	-0.373956	55849	-0.265375	0.815762	1.01784
002_G19	SPAC23D3.03C	SPAC23D3.03C	180	5	0.0277778	0.614458	35281	629	0.0178283	0.0969376	36095	0.0459423	0.538503	1.06219	11197	293	0.0261677	0.148638	15981	340	0.0212753	-0.0754213	27811	0.0148236	0.640178	1.01372
002_G20	SPAC823.14	ptf1	37146	674	0.0181446	6.83956e-05	57466	910	0.0158355	-0.0740731	96196	-0.0488301	0.753301	1.0462	18217	472	0.0259099	0.134351	65007	1167	0.0179519	-0.320461	84863	-0.227198	0.907134	1.01121
002_G21	SPAC24B11.12C	SPAC24B11.12C	23785	476	0.0200126	0.141436	64563	1116	0.0172854	0.0523265	89940	0.0572636	0.348475	1.0558	15427	536	0.0347443	0.557625	44061	1392	0.0315926	0.494987	61416	0.491492	0.0307038	0.555491
002_G22	SPAC8E11.02C	rad24	1242	31	0.0249597	0.46013	1507	36	0.0238885	0.519087	2816	0.492947	0.354663	1.06029	1124	26	0.0231317	-0.0292811	911	27	0.0296378	0.402838	2088	0.176021	0.866541	1.01145
002_G23	SPAC26F1.08C	SPAC26F1.08C	147	2	0.0136054	-0.415289	51906	876	0.0168767	0.0177986	52931	-0.0380677	0.753734	1.04588	23946	440	0.0183747	-0.361432	46173	977	0.0211596	-0.0832892	71536	-0.18998	0.989456	1.0009
002_G24	SPACUNK12.02C	cmk1	51669	995	0.0192572	0.0859242	14285	267	0.0186909	0.165108	67216	0.143873	0.167141	0.967271	37578	976	0.0259726	0.137842	6564	261	0.0397623	0.826804	45379	0.281679	0.150377	0.928207
002_H01	SPAPB8E5.05	mfm1	24691	494	0.0200073	0.141052	19128	331	0.0173045	0.0539142	44644	0.12053	0.273066	1.0389	33964	903	0.026587	0.171569	16391	366	0.0223293	-0.00565854	51624	0.128543	0.321971	1.01357
002_H02	SPBC32F12.02	rec14	31804	565	0.0177651	-0.0304307	11325	137	0.0120971	-0.462566	43831	-0.0894945	0.992018	1.00154	35078	940	0.0267974	0.182944	5978	114	0.0190699	-0.233299	42110	0.155267	0.304313	1.01481
002_H03	SPBC119.12	rud3	25732	459	0.0178377	-0.0245428	10019	157	0.0156702	-0.0892049	36367	-0.00736056	0.727167	1.05351	31997	950	0.0296903	0.33084	6866	180	0.0262161	0.225857	39993	0.334911	0.117481	0.864086
002_H04	SPBC337.04	ppk27	19984	343	0.0171637	-0.0801101	22219	368	0.0165624	-0.00931911	42914	-0.0398033	0.808158	1.03112	39054	805	0.0206125	-0.195632	8339	154	0.0184674	-0.279614	48352	-0.188086	0.993569	1.00152
002_H05	SPBC1347.12	arp1	17741	264	0.0148808	-0.286023	14657	248	0.0169202	0.0215193	32910	-0.132068	0.755488	1.04509	27731	593	0.021384	-0.142618	11904	410	0.0344422	0.619579	40638	0.134532	0.340277	1.00393
002_H06	SPBC365.01	crs103	25350	371	0.0146351	-0.31004	8874	157	0.0176921	0.0858771	34752	-0.166778	0.639004	1.05354	16837	298	0.0176991	-0.415473	3900	135	0.0346154	0.626815	21170	-0.142783	0.91968	1.00912
002_H07	SPBC1604.08C	imp1	22027	605	0.0274663	0.598189	5770	145	0.02513	0.592179	28547	0.639654	0.000735177	0.0429398	15259	916	0.0600301	1.34654	2538	157	0.0618597	1.4644	18870	1.387	1.71342e-05	0.00449488
002_H08	SPBC4C3.04C	SPBC4C3.04C	10063	171	0.0169929	-0.0945375	19059	292	0.0153208	-0.121735	29585	-0.123405	0.762052	1.04546	8793	192	0.0218356	-0.112472	9294	212	0.0228104	0.0250944	18491	-0.0455404	0.897154	1.01409
002_H09	SPBC16H5.11C	skb1	19520	431	0.0220799	0.283261	28994	530	0.0182796	0.133007	49475	0.193828	0.125422	0.879071	16400	458	0.0279268	0.242501	13063	383	0.0293195	0.38726	30304	0.308259	0.166749	0.954408
002_H10	SPBC582.09	pex11	21754	407	0.0187092	0.0442748	31514	500	0.015866	-0.0712958	54175	-0.0244739	0.694189	1.05364	12497	328	0.0262463	0.152963	11793	250	0.021199	-0.080601	24868	0.0457644	0.604674	1.03452
002_H11	SPBC17F3.01C	rga5	211	10	0.0473934	1.38521	98	2	0.0204082	0.291915	321	--	--	0.158655	152	6	0.0394737	0.741741	87	1	0.0114943	-0.963686	246	--	--	0.158655
002_H13	SPBC19C7.02	ubr1	11025	359	0.0325624	0.843732	2133	57	0.0267229	0.680847	13574	0.868336	0.000363972	0.0244249	5899	112	0.0189863	-0.314194	902	29	0.0321508	0.520255	6942	-0.153066	0.562365	1.03467
002_H14	SPBC839.07	ibp1	41382	643	0.0155382	-0.223658	36580	569	0.0155549	-0.0998574	79174	-0.155761	0.767415	1.04374	30107	40	0.00132859	-4.15118	12193	205	0.0168129	-0.415028	42545	--	--	0.158655
002_H15	SPBC215.01	SPBC215.01	6288	165	0.0262405	0.53232	3586	102	0.0284439	0.770891	10141	0.642826	0.0192787	0.428203	4280	111	0.0259346	0.135726	3119	107	0.0343059	0.613857	7617	0.353983	0.419045	1.04034
002_H16	SPBC9B6.09C	mdl1	31008	531	0.0171246	-0.0834019	86137	1315	0.0152664	-0.126873	118991	-0.1362	0.803905	1.0328	14244	258	0.0181129	-0.382134	33730	479	0.014201	-0.658605	48711	-0.585531	0.213261	0.984378
002_H18	SPBP4H10.16C	SPBP4H10.16C	20928	315	0.0150516	-0.269556	24268	385	0.0158645	-0.0714278	45896	-0.161147	0.707676	1.04838	12174	233	0.0191391	-0.302624	15003	229	0.0152636	-0.554502	27639	-0.439436	0.370388	1.01038
002_H19	SPBC25H2.08C	mrs2	11021	231	0.02096	0.208164	18783	326	0.0173561	0.0582135	30361	0.109864	0.396942	1.06188	5695	167	0.029324	0.31293	10003	255	0.0254924	0.185466	16120	0.22172	0.402594	1.03206
002_H20	SPBPB2B2.12C	gal10	22807	358	0.0156969	-0.20899	35227	566	0.0160672	-0.0531105	58958	-0.121313	0.906202	1.01497	19376	383	0.0197667	-0.256077	18173	261	0.014362	-0.642345	38193	-0.426656	0.432494	1.04811
002_H21	SPBC29A3.09C	SPBC29A3.09C	48112	1104	0.0229465	0.338798	73540	1262	0.0171607	0.0418798	124018	0.167383	0.113711	0.868391	94658	2792	0.0294957	0.321352	67726	1234	0.0182205	-0.299038	166410	0.104995	0.445755	1.05427
002_H22	SPCC1223.05C	rpl3702	36774	756	0.020558	0.180227	58595	1045	0.0178343	0.0974225	97170	0.124899	0.180955	0.975611	25831	989	0.0382873	0.697716	30953	1188	0.0383808	0.775785	58961	0.733842	0.00353757	0.210119
002_H23	SPBC30B4.03C	adn1	15786	332	0.0210313	0.213064	33815	633	0.0187195	0.167311	50566	0.167852	0.160345	0.957816	18464	414	0.022422	-0.074235	18222	380	0.0208539	-0.10428	37480	-0.0910332	0.81082	1.0218
002_H24	SPCC132.04C	gdh2	38307	695	0.0181429	-6.83989e-05	31825	556	0.0174705	0.0676934	71383	0.0426297	0.40855	1.06581	27300	556	0.0203663	-0.212967	21365	440	0.0205944	-0.122344	49661	-0.171681	0.962533	1.002
002_I01	SPAC16C9.06C	upf1	6662	144	0.0216151	0.252568	5181	114	0.0220035	0.4005	12101	0.331029	0.215628	0.9972	11693	375	0.0320705	0.442095	4932	332	0.0673155	1.58634	17332	0.883413	0.00541902	0.254613
002_I02	SPAC2F7.09C	SPAC2F7.09C	10309	192	0.0186245	0.0377286	9082	137	0.0150848	-0.144137	19720	-0.0296069	0.982443	1.00344	11399	289	0.0253531	0.103012	6379	169	0.0264932	0.241023	18236	0.160312	0.471691	1.04422
002_I03	SPAC17A5.11	rec12	34798	647	0.018593	0.035288	17157	306	0.0178353	0.0975034	52908	0.0829063	0.334019	1.04514	37526	878	0.0233971	-0.0128202	12956	314	0.0242359	0.112546	51674	0.0346007	0.485791	1.04103
002_I04	SPAC328.06	ubp2	30896	583	0.0188698	0.0566025	26842	418	0.0155726	-0.0982202	58739	0.00154162	0.578582	1.06654	50406	1018	0.020196	-0.22508	31979	552	0.0172613	-0.377055	83955	-0.274632	0.789133	1.01728
002_I05	SPAC17H9.08	SPAC17H9.08	27500	454	0.0165091	-0.136213	35005	574	0.0163977	-0.0237413	63533	-0.0745106	0.879865	1.02478	22868	565	0.024707	0.06577	18954	469	0.0247441	0.142487	42856	0.10096	0.387533	1.01663
002_I06	SPAC3A12.09C	SPAC3A12.09C	15000	252	0.0168	-0.111012	23994	454	0.0189214	0.182788	39700	0.0641087	0.453156	1.06106	23719	436	0.0183819	-0.360866	20699	343	0.0165708	-0.435951	45197	-0.394464	0.510017	1.03583
002_I07	SPAC1834.05	alg9	35602	546	0.0153362	-0.242531	15215	266	0.0174827	0.0687009	51629	-0.116139	0.910687	1.01495	31648	721	0.0227819	-0.0512657	6707	206	0.0307142	0.454307	39282	0.0682121	0.45912	1.04506
002_I09	SPAC19A8.04	erg5	35733	613	0.017155	-0.0808433	40147	619	0.0154183	-0.112584	77112	-0.0930966	0.949612	1.01288	53510	1272	0.0237713	0.0100676	19448	438	0.0225216	0.00671075	74668	0.0239157	0.487976	1.04075
002_I10	SPAC3H5.07	rpl702	9113	193	0.0211785	0.22313	96107	1652	0.0171892	0.0442693	107065	0.0179045	0.484203	1.05687	9611	357	0.0371449	0.654015	47476	1721	0.0362499	0.693378	59165	0.659019	0.00732133	0.291741
002_I11	SPAC1B3.05	not3	84	1	0.0119048	-0.607935	22208	221	0.00995137	-0.744264	22514	-0.798274	0.000437822	0.0287686	44690	856	0.0191542	-0.301492	10788	220	0.020393	-0.136522	56554	-0.249252	0.856066	1.01503
002_I12	SPAC4G9.14	SPAC4G9.14	8947	194	0.0216832	0.257107	22161	435	0.0196291	0.235761	31737	0.223467	0.152346	0.929401	7619	196	0.0257252	0.124029	23390	824	0.0352287	0.652154	32029	0.512868	0.0429244	0.619844
002_I13	SPAC20H4.05C	SPAC20H4.05C	42448	632	0.0148888	-0.285245	29412	447	0.0151979	-0.133361	72939	-0.205873	0.563012	1.06078	39529	927	0.0234511	-0.00949277	27058	645	0.0238377	0.0886456	68159	0.0343462	0.468318	1.04558
002_I14	SPAC57A7.12	SPAC57A7.12	22061	310	0.0140519	-0.368703	43225	532	0.0123077	-0.437671	66128	-0.425261	0.0714153	0.731312	37218	900	0.0241818	0.0347738	27936	450	0.0161082	-0.476799	66504	-0.153909	0.89846	1.01447
002_I15	SPAC22E12.14C	sck2	72	1	0.0138889	-0.385542	53138	687	0.0129286	-0.366665	53898	-0.421596	0.0790186	0.759831	22573	368	0.0163027	-0.534043	33187	583	0.0175671	-0.351721	56711	-0.434728	0.444939	1.05552
002_I16	SPAC664.02C	arp8	58154	995	0.0171097	-0.0846552	35669	523	0.0146626	-0.185091	95341	-0.0981491	0.980134	1.00303	67157	1582	0.0235567	-0.00301074	11038	188	0.0170321	-0.396344	79965	-0.0263415	0.595349	1.03774
002_I17	SPAC22H10.04	ppa3	20791	319	0.0153432	-0.241876	88097	1129	0.0128154	-0.37935	110336	-0.381091	0.0901957	0.803608	17117	332	0.0193959	-0.283397	46603	762	0.0163509	-0.45523	64814	-0.425148	0.464543	1.0468
002_I18	SPAC6G9.05	pcd1	51417	942	0.0183208	0.0140083	23517	388	0.0164987	-0.0148784	76264	0.0354266	0.425962	1.06204	51516	996	0.0193338	-0.288025	13388	327	0.0244249	0.123752	66227	-0.177509	0.957929	1.00318
002_I19	SPAC23D3.09	arp42	59899	942	0.0157265	-0.206278	80189	1135	0.0141541	-0.236015	142165	-0.224139	0.391085	1.05606	46808	820	0.0175184	-0.430282	53357	748	0.0140188	-0.677238	101733	-0.558395	0.224324	0.990425
002_I20	SPAC824.02	bst1	3979	54	0.0135712	-0.41892	10946	143	0.0130641	-0.35162	15122	-0.391843	0.0920472	0.806435	3346	31	0.00926479	-1.34932	6881	110	0.015986	-0.487785	10368	-0.74163	0.0417134	0.610761
002_I21	SPAC24C9.08	SPAC24C9.08	53505	1023	0.0191197	0.0755872	65842	1022	0.015522	-0.102916	121392	-0.0153688	0.633106	1.05262	72674	1618	0.0222638	-0.0844503	48534	880	0.0181316	-0.306091	123706	-0.161654	0.988634	1.00039
002_I22	SPAC8E11.03C	dmc1	36164	563	0.015568	-0.220893	13373	200	0.0149555	-0.156554	50300	-0.169131	0.688504	1.05774	26690	516	0.0193331	-0.288079	7667	206	0.0268684	0.261312	35079	-0.133548	0.926638	1.00311
002_I23	SPAC26F1.10C	pyp1	64	2	0.03125	0.784383	41283	685	0.0165928	-0.00667481	42034	-0.0597799	0.894741	1.02136	30329	570	0.0187939	-0.328887	31198	743	0.0238156	0.0873103	62840	-0.111367	0.794843	1.01631
002_I24	SPACUNK4.11C	mpp6	22668	416	0.0183519	0.0164531	23202	506	0.0218085	0.387657	46792	0.214909	0.106099	0.849327	42373	1241	0.0292875	0.311135	21330	813	0.0381153	0.765773	65757	0.48406	0.0317492	0.549157
002_J01	SPAPYUK71.03C	syn1	27087	597	0.0220401	0.280657	13889	235	0.0169199	0.021487	41808	0.229497	0.103106	0.840298	27126	830	0.030598	0.374284	12632	378	0.029924	0.416705	40966	0.398361	0.0769693	0.732022
002_J02	SPBC32H8.06	mug93	31644	587	0.0185501	0.0319552	7554	134	0.0177389	0.0896893	39919	0.0869119	0.384387	1.05514	59511	1369	0.0230042	-0.0372565	7936	196	0.0246976	0.139771	69012	0.00939391	0.517975	1.03661
002_J03	SPBC1215.01	shy1	30810	596	0.0193444	0.0924403	11313	199	0.0175904	0.0775559	42918	0.124039	0.27311	1.03782	31596	719	0.022756	-0.0529008	11148	207	0.0185684	-0.271752	43670	-0.0896523	0.780118	1.02028
002_J04	SPBC342.05	crb2	33798	636	0.0188177	0.0526156	39288	615	0.0156536	-0.0907333	74337	-0.0168925	0.620582	1.05858	47944	994	0.0207325	-0.187255	19090	311	0.0162913	-0.460501	68339	-0.243858	0.874955	1.01152
002_J05	SPBC13E7.09	vrp1	15953	258	0.0161725	-0.16593	37763	616	0.0163123	-0.031274	54590	-0.0900259	0.968249	1.00588	13700	291	0.0212409	-0.152307	22526	412	0.01829	-0.293545	36929	-0.248443	0.80566	1.02143
002_J07	SPBC1683.13C	cha4	28555	509	0.0178252	-0.0255511	42439	608	0.0143264	-0.21855	72111	-0.138447	0.844271	1.02891	18696	386	0.0206461	-0.193279	33021	644	0.0195027	-0.200921	52747	-0.211009	0.945686	1.00405
002_J08	SPBC4F6.12	pxl1	19738	394	0.0199615	0.137746	14802	273	0.0184435	0.145878	35207	0.157111	0.244944	1.02597	16047	337	0.0210008	-0.168706	4801	135	0.0281191	0.326954	21320	-0.0260647	0.806945	1.02183
002_J09	SPBC1703.06	pof10	33563	688	0.0204988	0.176064	55692	953	0.017112	0.0377751	90896	0.086263	0.268071	1.03997	35948	977	0.0271781	0.203296	36649	793	0.0216377	-0.0510513	74367	0.080825	0.381647	1.0113
002_J10	SPBC609.02	ptn1	27838	547	0.0196494	0.115012	58143	1021	0.0175602	0.0750745	87549	0.0745285	0.299991	1.04089	25469	735	0.0288586	0.289851	28351	682	0.0240556	0.101774	55237	0.191683	0.230172	0.988517
002_J11	SPBC17G9.05	rct1	28176	508	0.0180295	-0.00911165	47016	706	0.0150162	-0.150715	76406	-0.10119	0.986636	1.00092	26769	619	0.0231238	-0.0297745	20601	462	0.0224261	0.000580164	48451	-0.0146216	0.594544	1.03806
002_J12	SPBC6B1.02	ppk30	62717	1220	0.0194525	0.100479	22234	368	0.0165512	-0.0102927	86539	0.110201	0.214002	0.996992	33935	704	0.0207455	-0.186349	11403	225	0.0197316	-0.184087	46267	-0.169985	0.967193	1.0032
002_J13	SPBC19C7.09C	uve1	49825	876	0.0175815	-0.0454123	21324	323	0.0151473	-0.138175	72348	-0.039391	0.715508	1.05012	34193	748	0.0218758	-0.109813	12030	160	0.0133001	-0.753163	47131	-0.230861	0.884729	1.0113
002_J14	SPBC887.10	mcs4	40144	640	0.0159426	-0.186586	14092	185	0.013128	-0.344582	55061	-0.187164	0.627113	1.05827	37645	713	0.0189401	-0.317707	14476	225	0.015543	-0.528336	53059	-0.357219	0.599523	1.03414
002_J15	SPBC215.06C	SPBC215.06C	20063	390	0.0194388	0.0994634	14389	194	0.0134825	-0.306141	35036	-0.0309267	0.82941	1.03072	13320	325	0.0243994	0.047695	11582	175	0.0151097	-0.569128	25402	-0.199276	0.838813	1.01914
002_J16	SPBP16F5.03C	tra1	26692	420	0.0157351	-0.205491	35178	514	0.0146114	-0.190136	62804	-0.198125	0.592192	1.06305	17102	278	0.0162554	-0.538231	29150	456	0.0156432	-0.51906	46986	-0.538678	0.270492	1.01855
002_J17	SPBC21C3.09C	SPBC21C3.09C	15457	308	0.0199262	0.135197	27190	482	0.0177271	0.088726	43437	0.0971011	0.336519	1.0457	10831	242	0.0223433	-0.0793101	10558	263	0.02491	0.152128	21894	0.0344718	0.664977	1.02565
002_J18	SPBP8B7.06	rpp201	28341	538	0.0189831	0.0652422	49359	801	0.016228	-0.0387419	79039	-0.00713786	0.577831	1.06703	13447	307	0.0228304	-0.0481963	23846	632	0.0265034	0.241579	38232	0.127278	0.360797	1.0078
002_J19	SPBC27.04	uds1	19852	359	0.0180838	-0.00477385	70649	1070	0.0151453	-0.138361	91930	-0.133307	0.859337	1.02471	16995	333	0.019594	-0.268739	32790	495	0.0150961	-0.570426	50613	-0.471023	0.376325	1.01776
002_J20	SPBPJ4664.03	mfm3	28005	442	0.0157829	-0.201111	40477	589	0.0145515	-0.196066	69513	-0.20206	0.578371	1.06677	31531	504	0.0159843	-0.562498	19464	347	0.0178278	-0.330471	51846	-0.466139	0.385625	1.01331
002_J21	SPBC29A3.18	cyt1	23294	403	0.0173006	-0.0686519	46025	869	0.018881	0.179707	70591	0.0834686	0.291534	1.03431	29564	663	0.0224259	-0.0739833	48068	1179	0.0245278	0.129817	79474	0.0416071	0.454128	1.04732
002_J22	SPCC1223.06	tea1	43567	706	0.0162049	-0.163041	33783	500	0.0148003	-0.1716	78556	-0.151551	0.786133	1.03743	36441	737	0.0202245	-0.223049	20415	365	0.017879	-0.326331	57958	-0.250203	0.855113	1.01466
002_J23	SPBC30D10.18C	rpl102	16814	334	0.0198644	0.130712	19902	380	0.0190936	0.195855	37430	0.167208	0.212146	0.995698	19701	547	0.0277651	0.234121	13096	300	0.0229078	0.031238	33644	0.163856	0.324823	1.01342
002_J24	SPCC1322.08	srk1	29036	648	0.0223171	0.298678	26346	523	0.0198512	0.251996	56553	0.287945	0.0351067	0.567829	34931	983	0.0281412	0.253533	17606	451	0.0256163	0.192462	53971	0.243697	0.174173	0.961925
002_K01	SPAC1705.02	SPAC1705.02	5112	119	0.0232786	0.359529	6474	143	0.0220884	0.406055	11848	0.384877	0.149362	0.920096	12666	458	0.0361598	0.615236	4619	142	0.0307426	0.45564	17885	0.590499	0.0506351	0.669745
002_K02	SPAC2F7.10	akr1	18489	340	0.0183893	0.0193942	36944	569	0.0154017	-0.114142	56342	-0.0787721	0.914635	1.01469	43925	1021	0.0232442	-0.022282	23800	477	0.020042	-0.161571	69223	-0.0596653	0.669157	1.02706
002_K03	SPAC17C9.09C	tim13	30144	540	0.017914	-0.0183848	28136	504	0.017913	0.103776	59324	0.0487416	0.413837	1.0655	36975	924	0.0249899	0.0821921	19058	474	0.0248714	0.149892	57431	0.114073	0.336041	1.0094
002_K04	SPAC328.09	SPAC328.09	29508	510	0.0172834	-0.0700822	17239	263	0.0152561	-0.127844	47520	-0.0667127	0.894948	1.02086	25706	536	0.0208512	-0.179023	10295	170	0.0165129	-0.441007	36707	-0.233311	0.840588	1.01737
002_K05	SPAC17H9.11	gmf1	35052	618	0.0176309	-0.0413633	43988	654	0.0148677	-0.16505	80312	-0.105863	0.992314	1.00152	51393	874	0.0170062	-0.473089	22106	311	0.0140686	-0.672122	74684	-0.515852	0.304676	1.01494
002_K06	SPAC3A12.12	atp11	16637	253	0.0152071	-0.254731	20741	324	0.0156212	-0.0937226	37955	-0.165925	0.65832	1.05505	15885	366	0.0230406	-0.0349721	10776	287	0.0266333	0.248631	27314	0.0874095	0.497657	1.04025
002_K07	SPAC1851.03	ckb1	9850	163	0.0165482	-0.132797	8540	178	0.0208431	0.322338	18731	0.0985429	0.598578	1.06242	6850	172	0.0251095	0.089082	3450	139	0.0402899	0.845818	10611	0.389328	0.277529	1.02905
002_K08	SPAC3G6.11	chl1	22353	391	0.0174921	-0.0527732	17832	303	0.0169919	0.0276183	40879	-0.00402873	0.680899	1.06105	20929	512	0.0244637	0.0514898	8585	211	0.0245778	0.132755	30237	0.0876536	0.473717	1.04138
002_K09	SPAC19A8.10	rfp1	32183	578	0.0179598	-0.0147027	25821	464	0.0179699	0.108349	59046	0.0528237	0.401901	1.06253	26777	493	0.0184113	-0.358557	9448	183	0.0193692	-0.210836	36901	-0.304905	0.675273	1.02694
002_K10	SPAC3H5.12C	rpl501	13859	248	0.0178945	-0.0199564	14067	304	0.0216109	0.374526	28478	0.190752	0.228847	1.00808	24078	566	0.0235069	-0.00606416	8228	330	0.040107	0.839254	33202	0.266754	0.196187	0.977209
002_K11	SPAC1D4.13	byr1	52787	908	0.0172012	-0.0769637	35330	529	0.0149731	-0.154857	89554	-0.0867395	0.922516	1.0138	29380	802	0.0272975	0.209617	27332	574	0.021001	-0.0941386	58088	0.073812	0.402672	1.03142
002_K12	SPAC4G9.20C	SPAC4G9.20C	27251	471	0.0172838	-0.0700554	56302	774	0.0137473	-0.278084	84798	-0.216925	0.513009	1.061	41730	913	0.0218787	-0.109621	23351	391	0.0167445	-0.420914	66385	-0.202307	0.979444	1.004
002_K13	SPAC20H4.10	ufd2	11584	179	0.0154523	-0.231647	37637	522	0.0138693	-0.265333	49922	-0.282167	0.314447	1.04617	15885	380	0.0239219	0.0191837	21812	478	0.0219145	-0.0327098	38555	-0.0184146	0.638841	1.01364
002_K14	SPAC589.09	csr101	29467	447	0.0151695	-0.258299	39624	505	0.0127448	-0.387322	70043	-0.329844	0.202005	1.0002	23045	476	0.0206552	-0.192643	37306	553	0.0148234	-0.596727	61380	-0.435149	0.445456	1.05436
002_K15	SPAC22F3.03C	rdh54	52609	845	0.0160619	-0.175832	61527	792	0.0128724	-0.37295	115773	-0.272007	0.289887	1.04016	58607	1187	0.0202536	-0.220976	34999	446	0.0127432	-0.814868	95239	-0.402091	0.48623	1.04055
002_K16	SPAC664.15	caf4	45588	763	0.0167369	-0.116444	17599	270	0.0153418	-0.119765	64220	-0.0831667	0.916751	1.01525	35689	706	0.019782	-0.254962	12874	235	0.0182538	-0.296398	49504	-0.250605	0.841873	1.01736
002_K17	SPAC22H10.07	scd2	3326	42	0.0126278	-0.522872	32433	426	0.0131348	-0.34384	36227	-0.404105	0.097396	0.823558	14077	261	0.0185409	-0.348441	14455	227	0.0157039	-0.513475	29020	-0.430642	0.39148	1.01849
002_K18	SPAC7D4.02C	sfp47	22590	407	0.0180168	-0.0101288	34043	553	0.0162442	-0.0373097	57593	-0.0309159	0.709119	1.04806	30121	586	0.0194549	-0.27902	24274	405	0.0166845	-0.426088	55386	-0.339532	0.640967	1.01395
002_K19	SPAC23E2.01	fep1	18277	282	0.0154292	-0.233807	40309	669	0.0165968	-0.00632677	59537	-0.0934179	0.970625	1.00504	21669	430	0.019844	-0.250447	26608	447	0.0167995	-0.416184	49154	-0.343702	0.623778	1.02114
002_K20	SPAC824.04	SPAC824.04	18909	450	0.0237982	0.391379	52774	1137	0.0215447	0.370102	73270	0.354292	0.00935512	0.270698	13703	411	0.0299934	0.345496	24844	573	0.0230639	0.0410393	39531	0.147097	0.324889	1.01263
002_K21	SPAC24C9.14	otu1	27383	443	0.0161779	-0.165447	38633	549	0.0142106	-0.230259	67008	-0.204783	0.567968	1.06376	21294	384	0.0180332	-0.388491	13396	270	0.0201553	-0.153441	35344	-0.290172	0.701259	1.02297
002_K22	SPAC8F11.03	msh3	24609	493	0.0200333	0.142928	21653	378	0.0174572	0.0665883	47133	0.120538	0.262496	1.03878	12982	307	0.0236481	0.00257534	10360	230	0.0222008	-0.0139885	23879	-0.00294866	0.720838	1.02124
002_K23	SPAC27D7.02C	SPAC27D7.02C	27266	468	0.0171642	-0.0800679	24941	410	0.0164388	-0.0201264	53085	-0.0423296	0.770695	1.04057	24222	600	0.0247709	0.0694939	15352	320	0.0208442	-0.104953	40494	0.0121384	0.56469	1.03713
002_K24	SPACUNK4.13C	SPACUNK4.13C	14292	249	0.0174223	-0.0585354	13213	249	0.0188451	0.176957	28003	0.0641445	0.560098	1.06035	16807	505	0.030047	0.348071	8662	294	0.0339414	0.598446	26268	0.444511	0.0838394	0.758409
002_L01	SPBC106.02C	srx1	33854	746	0.0220358	0.280376	11968	233	0.0194686	0.223917	46801	0.302961	0.0373982	0.578205	31244	980	0.031366	0.410052	11304	324	0.0286624	0.354562	43852	0.410838	0.0674703	0.710356
002_L02	SPBC32H8.08C	omh5	14052	270	0.0192143	0.0827106	8304	141	0.0169798	0.0265858	22767	0.086169	0.563518	1.0611	18113	420	0.0231878	-0.0257868	7159	192	0.0268194	0.258678	25884	0.0710492	0.542798	1.03874
002_L03	SPBC1271.05C	SPBC1271.05C	14542	383	0.0263375	0.537645	17476	434	0.0248341	0.575089	32835	0.559146	0.00181344	0.0828926	8350	274	0.0328144	0.475177	9817	278	0.0283182	0.337132	18719	0.398405	0.154692	0.929334
002_L04	SPBC342.06C	rtt109	10470	383	0.0365807	1.01161	13391	400	0.0298708	0.841505	24644	0.92205	5.31241e-06	0.000670214	9621	227	0.0235942	-0.000717115	17204	511	0.0297024	0.405981	27563	0.2551	0.236443	0.988474
002_L05	SPBC13E7.11	rbd1	21087	384	0.0182103	0.00527912	25159	401	0.0159386	-0.0647033	47031	-0.0289432	0.742173	1.04922	12723	233	0.0183133	-0.36626	15777	431	0.0273182	0.285267	29164	0.0152788	0.627191	1.02142
002_L06	SPBC3E7.05C	SPBC3E7.05C	23367	318	0.0136089	-0.414919	25458	392	0.0153979	-0.114496	49535	-0.252108	0.397513	1.06071	13657	302	0.0221132	-0.0942427	9968	234	0.0234751	0.0665342	24161	-0.0230239	0.762376	1.02082
002_L07	SPBC1685.01	pmp1	19557	304	0.0155443	-0.223087	14743	223	0.0151258	-0.140217	34827	-0.172713	0.61827	1.05807	10776	217	0.0201373	-0.229277	7899	169	0.0213951	-0.067317	19061	-0.15745	0.854369	1.01569
002_L08	SPBC543.02C	SPBC543.02C	17028	268	0.0157388	-0.205149	12567	175	0.0139254	-0.259516	30038	-0.210354	0.470072	1.05749	8755	246	0.0280982	0.251329	8214	128	0.0155832	-0.524611	17343	-0.0648058	0.962673	1.00182
002_L09	SPBC1718.02	hop1	37972	714	0.0188033	0.0515148	40111	595	0.0148338	-0.168339	79392	-0.0469226	0.742437	1.04865	34977	640	0.0182977	-0.367485	21635	508	0.0234805	0.0668631	57760	-0.185	0.982268	1.00265
002_L10	SPBC609.03	iqw1	50904	987	0.0193894	0.0957977	24731	440	0.0177914	0.093952	77062	0.123552	0.193247	0.992672	47067	893	0.018973	-0.315206	13759	261	0.0189694	-0.240924	61980	-0.281059	0.782183	1.01875
002_L11	SPBC17G9.12C	SPBC17G9.12C	40489	689	0.017017	-0.0924994	32642	517	0.0158385	-0.0737962	74337	-0.0706324	0.849652	1.02753	34972	668	0.019101	-0.305503	17650	332	0.0188102	-0.253083	53622	-0.278681	0.780816	1.01823
002_L12	SPBC713.11C	pmp3	38948	659	0.01692	-0.100744	29324	476	0.0162324	-0.0383513	69407	-0.0589809	0.803089	1.03301	27384	463	0.0169077	-0.481472	24977	476	0.0190575	-0.234237	53300	-0.36231	0.588751	1.03889
002_L13	SPBC19F8.02	SPBC19F8.02	47782	747	0.0156335	-0.214832	12709	190	0.01495	-0.157082	61428	-0.160979	0.740199	1.04925	29775	551	0.0185055	-0.3512	7291	141	0.0193389	-0.213092	37758	-0.304267	0.680299	1.0237
002_L15	SPBC215.07C	SPBC215.07C	39827	820	0.020589	0.182404	19695	364	0.0184818	0.148878	60706	0.199867	0.0975753	0.822868	30069	759	0.0252419	0.0966723	11893	219	0.0184142	-0.28378	42940	0.0158085	0.547516	1.03893
002_L16	SPBP16F5.05C	yar1	33303	614	0.0184368	0.0231132	32266	480	0.0148763	-0.164211	66663	-0.0537804	0.784494	1.03831	24206	484	0.019995	-0.239508	15851	322	0.0203142	-0.142111	40863	-0.196217	0.949324	1.00419
002_L17	SPBC21C3.13	rps1901	976	28	0.0286885	0.661	28024	574	0.0204824	0.297157	29602	0.261403	0.116098	0.867708	26235	697	0.0265676	0.170515	11383	363	0.0318897	0.50849	38678	0.289627	0.156929	0.933863
002_L18	SPBP8B7.23	rnf10	29431	518	0.0176005	-0.0438578	12922	154	0.0119177	-0.48413	43025	-0.12631	0.836034	1.03002	27325	548	0.0200549	-0.235196	9494	138	0.0145355	-0.625018	37505	-0.307184	0.672724	1.02703
002_L19	SPBC27B12.05	SPBC27B12.05	25533	423	0.0165668	-0.131179	53537	921	0.0172031	0.0454339	80414	-0.0269765	0.657175	1.05536	11496	295	0.0256611	0.120432	19017	511	0.0268707	0.261435	31319	0.196413	0.290192	1.02874
002_L20	SPCC1020.07	SPCC1020.07	7662	177	0.023101	0.348483	14426	283	0.0196174	0.2349	22548	0.266064	0.160304	0.95939	7650	214	0.0279739	0.244928	5916	161	0.0272143	0.279768	13941	0.261953	0.380117	1.01407
002_L21	SPBC2A9.03	SPBC2A9.03	19325	303	0.0156792	-0.210624	45901	753	0.0164049	-0.0231067	66282	-0.0972165	0.976117	1.00446	13600	324	0.0238235	0.0132365	19551	528	0.0270063	0.268697	34003	0.156858	0.333573	1.01458
002_L22	SPCC1223.13	cbf12	28521	600	0.0210371	0.213465	31065	505	0.0162562	-0.0362377	60691	0.0986937	0.271824	1.04298	14287	284	0.0198782	-0.247963	14119	301	0.0213188	-0.0724727	28991	-0.162702	0.958889	1.00352
002_L23	SPBC31F10.07	lsb5	16777	355	0.0211599	0.221861	24708	448	0.0181318	0.12129	42288	0.160503	0.201165	0.999171	13614	282	0.020714	-0.188547	13365	282	0.0210999	-0.087363	27543	-0.141084	0.997585	1.00076
002_L24	SPCC1322.15	rpl3402	16358	293	0.0179117	-0.018569	30418	501	0.0164705	-0.0173457	47570	-0.0289368	0.739508	1.05111	18035	460	0.025506	0.111684	10261	336	0.0327453	0.546692	29092	0.287228	0.192669	0.976686
002_M01	SPAC1782.01	ecm29	9836	224	0.0227735	0.327882	2402	44	0.0183181	0.136036	12506	0.338558	0.196092	0.994331	8881	270	0.030402	0.365015	2601	110	0.0422914	0.915767	11862	0.521683	0.129309	0.892687
002_M02	SPAC2G11.05C	rim20	19192	329	0.0171426	-0.0818908	31336	533	0.0170092	0.0290835	51390	-0.0217025	0.69373	1.05396	39429	814	0.0206447	-0.193379	14829	263	0.0177355	-0.337957	55335	-0.215832	0.937573	1.00562
002_M03	SPAC17D4.03C	cis4	13601	282	0.0207338	0.192509	24464	406	0.0165958	-0.00641157	38753	0.0616362	0.467387	1.05597	9433	249	0.0263967	0.161207	20242	630	0.0311234	0.473402	30554	0.361673	0.121797	0.881421
002_M04	SPAC328.10C	rps502	7591	131	0.0172573	-0.0722684	18377	279	0.015182	-0.134867	26378	-0.133418	0.697067	1.05244	7832	220	0.0280899	0.2509	13770	333	0.024183	0.109395	22155	0.151172	0.434497	1.04973
002_M05	SPAC17H9.14C	pdi2	32998	613	0.0185769	0.0340352	39252	586	0.0149292	-0.159096	73449	-0.0615451	0.810095	1.03151	39799	949	0.0238448	0.0145253	18785	495	0.0263508	0.233249	60028	0.0965496	0.361619	1.0083
002_M06	SPAC3C7.04	SPAC3C7.04	6026	101	0.0167607	-0.114391	23934	434	0.0181332	0.121403	30495	0.044194	0.597576	1.06423	2907	95	0.0326797	0.469246	11887	446	0.03752	0.743061	15335	0.665674	0.0376646	0.58408
002_M08	SPAC3G9.04	ssu72	13703	840	0.0613004	1.75642	14901	783	0.0525468	1.65637	30227	1.71207	4.03948e-18	3.18513e-15	13239	563	0.0425259	0.84919	9346	381	0.0407661	0.862772	23529	0.858479	0.00372922	0.213447
002_M09	SPAC19B12.04	rps3001	44628	656	0.0146993	-0.303727	25363	392	0.0154556	-0.109103	71039	-0.20991	0.548247	1.06019	40059	924	0.023066	-0.0333842	11523	338	0.0293326	0.387909	52844	0.0858297	0.389278	1.01866
002_M10	SPAC3H8.03	img2	26316	455	0.0172899	-0.069547	53692	921	0.0171534	0.041263	81384	-0.010043	0.587874	1.06316	20238	442	0.0218401	-0.112171	27530	587	0.0213222	-0.0722424	48797	-0.097816	0.783742	1.01867
002_M11	SPAC1F3.05	gga21	58381	1037	0.0177626	-0.0306283	39333	618	0.015712	-0.0853644	99369	-0.0321133	0.681748	1.06132	60760	1201	0.0197663	-0.256108	20930	391	0.0186813	-0.263002	83282	-0.242334	0.870424	1.01148
002_M12	SPAC513.02	SPAC513.02	40948	658	0.0160692	-0.175179	48542	716	0.0147501	-0.176505	90864	-0.173724	0.680234	1.06316	30311	685	0.0225991	-0.0628881	27645	698	0.0252487	0.17161	59339	0.0498287	0.444973	1.0548
002_M13	SPAC222.14C	SPAC222.14C	37490	736	0.0196319	0.113727	40797	759	0.0186043	0.158406	79782	0.140994	0.159181	0.954478	31535	815	0.0258443	0.130695	18287	429	0.0234593	0.0655609	51066	0.115189	0.343794	1.0021
002_M14	SPAC630.05	gyp7	28132	396	0.0140765	-0.366185	41299	602	0.0145766	-0.193574	70429	-0.268847	0.351053	1.05752	19252	368	0.0191149	-0.304453	19023	455	0.0239184	0.0935234	39098	-0.100453	0.825069	1.01816
002_M15	SPAC22F3.08C	rok1	13992	224	0.0160091	-0.180577	14636	213	0.0145532	-0.195899	29065	-0.182101	0.552818	1.05993	22401	563	0.0251328	0.0904211	8330	267	0.0320528	0.515853	31561	0.228474	0.247046	0.997052
002_M16	SPAC688.14	set13	16232	295	0.018174	0.00240085	41230	649	0.015741	-0.082707	58406	-0.0761287	0.897803	1.01822	13961	296	0.0212019	-0.154956	20236	315	0.0155663	-0.526171	34808	-0.36764	0.533128	1.04048
002_M17	SPAC22H10.13	zym1	47732	717	0.0150214	-0.272457	53804	763	0.0141811	-0.233261	103016	-0.248701	0.378653	1.05594	42771	817	0.0191017	-0.305448	34016	517	0.0151987	-0.560648	78121	-0.408118	0.492125	1.03695
002_M18	SPAC806.08C	mod21	30054	516	0.0171691	-0.0796593	48784	858	0.0175877	0.0773386	80212	0.00911161	0.515015	1.06098	25751	596	0.0231447	-0.0284668	27780	628	0.0226062	0.0121196	54755	-0.0117855	0.575158	1.03878
002_M19	SPAC23G3.02C	sib1	26970	462	0.0171301	-0.082936	40902	659	0.0161117	-0.0491239	68993	-0.0684095	0.844875	1.02846	18901	372	0.0196815	-0.262311	21699	411	0.018941	-0.243088	41383	-0.25741	0.802915	1.02042
002_M20	SPAC824.08	gda1	36511	681	0.0186519	0.0398503	27193	472	0.0173574	0.0583206	64857	0.0636293	0.355789	1.06064	21470	537	0.0250116	0.0834492	16925	323	0.0190842	-0.23222	39255	-0.0415244	0.686937	1.02584
002_M21	SPAC25G10.03	zip1	45077	875	0.0194112	0.0974182	57073	1042	0.0182573	0.131244	104067	0.115854	0.198775	0.999899	21905	571	0.0260671	0.14308	27703	549	0.0198173	-0.177834	50728	-0.0300885	0.622757	1.02213
002_M22	SPAC9.05	fml1	18866	406	0.0215202	0.246218	23485	466	0.0198425	0.251359	43223	0.249625	0.0794332	0.759189	16890	366	0.0216696	-0.123476	12351	261	0.0211319	-0.0851764	29868	-0.10447	0.894119	1.01394
002_M24	SPAP14E8.04	oma1	40611	742	0.0182709	0.0100753	23153	408	0.0176219	0.080139	64914	0.0585125	0.370714	1.05909	39383	1140	0.0289465	0.294238	10197	402	0.0394234	0.814452	51122	0.43203	0.052816	0.684217
002_N01	SPBC106.10	pka1	9165	238	0.0259684	0.517281	7273	179	0.0246116	0.562106	16855	0.550705	0.0146387	0.360706	14483	459	0.0316923	0.424983	7066	234	0.0331163	0.562945	22242	0.480292	0.0796785	0.739905
002_N04	SPBC354.13	rga6	4776	97	0.0203099	0.162709	4283	79	0.018445	0.146	9235	0.165844	0.678142	1.06305	6795	182	0.0267844	0.182242	3114	108	0.0346821	0.629592	10199	0.344299	0.347135	0.998886
002_N06	SPBC3H7.13	far10	11783	166	0.0140881	-0.364997	14095	248	0.0175949	0.0779257	26292	-0.114403	0.764312	1.04312	10165	227	0.0223315	-0.0800686	6745	196	0.0290586	0.374365	17333	0.117838	0.566461	1.03736
002_N07	SPBC16A3.17C	SPBC16A3.17C	12507	222	0.0177501	-0.0316494	25068	491	0.0195867	0.232645	38288	0.131822	0.280354	1.03541	14189	366	0.0257946	0.12792	13345	421	0.0315474	0.492923	28321	0.310207	0.173652	0.962424
002_N08	SPBC543.05C	SPBC543.05C	14188	267	0.0188187	0.0526952	32539	560	0.0172101	0.0460259	47554	0.0313236	0.514592	1.0608	15352	313	0.0203882	-0.211415	19667	293	0.0148981	-0.589475	35625	-0.413763	0.447883	1.05376
002_N09	SPBC1773.03C	SPBC1773.03C	13642	281	0.0205982	0.183042	47254	696	0.0147289	-0.17858	61873	-0.110296	0.959539	1.0088	12659	280	0.0221187	-0.0938873	45951	972	0.021153	-0.0837383	59862	-0.109927	0.793814	1.01748
002_N10	SPBC646.13	sds23	18093	320	0.0176864	-0.0368331	35707	656	0.0183717	0.140258	54776	0.0669677	0.372411	1.05914	14411	332	0.023038	-0.0351379	22914	711	0.0310291	0.469022	38368	0.277582	0.168851	0.956015
002_N11	SPBC1861.03	mak10	32540	653	0.0200676	0.145395	27853	459	0.0164794	-0.0165696	61505	0.0883962	0.295494	1.03554	27493	627	0.0228058	-0.0497496	20536	491	0.0239092	0.0929695	49147	0.0139999	0.532624	1.04143
002_N12	SPBC725.01	SPBC725.01	7584	156	0.0205696	0.181042	12493	186	0.0148883	-0.163048	20419	-0.0238547	0.984469	1.00226	7314	175	0.0239267	0.0194717	7693	185	0.0240478	0.101309	15367	0.0574187	0.73061	1.0222
002_N13	SPBC19F8.04C	lcl3	20672	340	0.0164474	-0.141617	18961	325	0.0171404	0.0401737	40298	-0.0456551	0.84815	1.02848	15426	305	0.0197718	-0.255705	13216	279	0.0211108	-0.0866188	29226	-0.177106	0.926394	1.00354
002_N14	SPBC8D2.19	mde3	23369	446	0.0190851	0.0729744	29456	446	0.0151412	-0.138749	53717	-0.0364845	0.744407	1.04956	20935	456	0.0217817	-0.116034	26504	501	0.0189028	-0.245998	48396	-0.192497	0.982723	1.00214
002_N15	SPBC216.02	mcp5	11470	193	0.0168265	-0.108738	8142	138	0.0169492	0.0239822	19943	-0.0372128	0.959037	1.00928	14560	281	0.0192995	-0.290591	7414	130	0.0175344	-0.354411	22385	-0.301602	0.583581	1.03792
002_N16	SPBP16F5.08C	SPBP16F5.08C	8856	133	0.0150181	-0.272774	32995	508	0.0153963	-0.11465	42492	-0.177245	0.634895	1.05337	14819	261	0.0176125	-0.422549	30280	499	0.0164795	-0.443924	45859	-0.452039	0.403429	1.03084
002_N17	SPBC23E6.08	sat1	720	19	0.0263889	0.540457	2235	40	0.0178971	0.102494	3014	0.20525	0.933443	1.01345	697	30	0.0430416	0.866581	1400	28	0.02	-0.164598	2155	0.262783	0.967744	1.00278
002_N18	SPBP8B7.25	cyp4	12307	180	0.0146258	-0.310956	34162	512	0.0149874	-0.15348	47161	-0.217804	0.503184	1.05172	15915	278	0.0174678	-0.434453	20675	279	0.0134946	-0.732221	37147	-0.598715	0.187947	0.986095
002_N19	SPBC28E12.06C	lvs1	27124	512	0.0188763	0.0571005	20208	379	0.0187549	0.17004	48223	0.120302	0.25879	1.03978	20682	500	0.0241756	0.0344017	14068	304	0.0216093	-0.0529442	35554	0.00523995	0.603668	1.03505
002_N20	SPCC1020.12C	xap5	13474	267	0.0198159	0.127188	35081	564	0.0160771	-0.0522257	49386	-0.0170787	0.684079	1.0592	15129	304	0.0200939	-0.232396	15581	347	0.0222707	-0.00945048	31361	-0.120994	0.921706	1.00818
002_N21	SPBC2A9.04C	san1	17286	291	0.0168344	-0.108058	18935	292	0.0154212	-0.112318	36804	-0.105638	0.885185	1.02454	13637	329	0.0241255	0.0314106	12817	225	0.0175548	-0.352732	27008	-0.138542	0.998495	0.999765
002_N22	SPCC1235.05C	fft2	34526	586	0.0169727	-0.0962559	26849	464	0.0172818	0.0520255	62425	-0.017641	0.643069	1.05308	46619	851	0.0182544	-0.37091	23763	496	0.0208728	-0.102975	71729	-0.268471	0.813069	1.02136
002_N23	SPBC31F10.09C	nut2	32425	608	0.018751	0.0474914	30296	487	0.0160747	-0.0524365	63816	0.0116031	0.528551	1.06317	41838	1130	0.0270089	0.194286	16910	558	0.0329982	0.55779	60436	0.317761	0.107304	0.842379
002_N24	SPCC1442.14C	hnt1	23014	499	0.0216825	0.257055	14687	284	0.0193368	0.21412	38484	0.262102	0.0805225	0.758113	21969	667	0.030361	0.363067	7175	266	0.0370732	0.725777	30077	0.473736	0.0603009	0.69028
002_O01	SPAC1782.05	ypa2	14570	280	0.0192176	0.0829526	3508	50	0.0142531	-0.225952	18408	0.0759236	0.677172	1.06259	25631	498	0.0194296	-0.280895	6846	223	0.0325738	0.539112	33198	-0.0543617	0.750987	1.01857
002_O02	SPAC2H10.01	SPAC2H10.01	10424	213	0.0204336	0.171471	1966	25	0.0127162	-0.390566	12628	0.149478	0.601685	1.06374	19060	545	0.0285939	0.276557	1757	78	0.0443939	0.985762	21440	0.376527	0.15307	0.92845
002_O07	SPAC18G6.15	mal3	18999	355	0.0186852	0.0424222	44666	823	0.0184256	0.144484	64843	0.0954599	0.271051	1.04128	19156	465	0.0242744	0.0402837	29618	648	0.0218786	-0.0350787	49887	-0.0146732	0.591084	1.03778
002_O08	SPAC3G9.08	png1	8935	170	0.0190263	0.0685218	395	7	0.0177215	0.0882713	9507	0.131493	0.76626	1.04442	9071	223	0.0245838	0.0585595	287	8	0.0278746	0.314351	9589	0.0986781	0.8131	1.021
002_O09	SPAC19B12.07C	SPAC19B12.07C	40837	690	0.0168964	-0.102754	48104	785	0.0163188	-0.0306952	90416	-0.0625129	0.811768	1.03114	37504	858	0.0228776	-0.0452175	41810	851	0.020354	-0.139287	81023	-0.0974376	0.761906	1.0215
002_O10	SPAC4A8.05C	myp2	6166	133	0.0215699	0.249546	29499	485	0.0164412	-0.0199123	36283	0.000790551	0.697147	1.05206	6568	205	0.0312119	0.402947	31986	791	0.0247296	0.141639	39550	0.164323	0.299485	1.01592
002_O11	SPAC1F3.06C	spo15	12786	226	0.0176756	-0.0377156	33786	564	0.0166933	0.00203862	47362	-0.0299175	0.744444	1.04914	15538	396	0.0254859	0.110549	23852	585	0.0245262	0.129728	40371	0.111481	0.378401	1.01379
002_O12	SPAC56E4.06C	ggt2	16624	304	0.0182868	0.0113304	733	10	0.0136426	-0.289116	17671	0.0629396	0.735886	1.05117	15254	411	0.0269438	0.1908	465	12	0.0258065	0.203133	16142	0.223206	0.399824	1.02999
002_O13	SPAC222.15	meu13	16222	255	0.0157194	-0.206928	54017	886	0.0164022	-0.0233378	71380	-0.0923527	0.949185	1.01345	17206	327	0.019005	-0.312772	32241	663	0.0205639	-0.124486	50437	-0.203397	0.960269	1.00329
002_O14	SPAC630.09C	mug58	28781	513	0.0178243	-0.0256312	29860	421	0.0140991	-0.241625	59575	-0.120794	0.909588	1.01444	25546	587	0.0229782	-0.0388876	22659	489	0.0215808	-0.054848	49281	-0.0465192	0.662906	1.02547
002_O15	SPAC22F3.12C	rgs1	34724	710	0.020447	0.172413	28299	449	0.0158663	-0.0712666	64182	0.0866229	0.294355	1.035	28147	697	0.0247629	0.0690268	31242	521	0.0166763	-0.426802	60607	-0.168696	0.938644	1.00505
002_O16	SPAC694.02	SPAC694.02	36973	612	0.0165526	-0.132414	71204	1139	0.0159963	-0.0594934	109928	-0.097522	0.995897	1.00066	66824	1463	0.0218933	-0.108659	69500	1245	0.0179137	-0.323537	139032	-0.214754	0.840602	1.01699
002_O17	SPAC23A1.04C	mnl1	39122	725	0.0185318	0.0305275	42121	650	0.0154317	-0.111331	82618	-0.0331911	0.682402	1.05972	32703	726	0.0221998	-0.0886041	25574	520	0.0203332	-0.140765	59523	-0.108637	0.791026	1.0168
002_O18	SPAC821.06	spn2	29197	522	0.0178785	-0.0212437	38954	683	0.0175335	0.0728831	69356	0.0299191	0.453583	1.06128	21792	472	0.0216593	-0.124162	20303	591	0.029109	0.376867	43158	0.131478	0.336964	1.00546
002_O19	SPAC23G3.05C	SPAC23G3.05C	14189	223	0.0157164	-0.207203	15750	249	0.0158095	-0.0764371	30411	-0.135546	0.723974	1.05226	13923	264	0.0189614	-0.316083	11640	274	0.0235395	0.0704865	26101	-0.131394	0.99364	1.00127
002_O20	SPAC869.05C	SPAC869.05C	19223	388	0.0201842	0.15375	26234	489	0.0186399	0.161166	46334	0.155767	0.194023	0.993424	13680	345	0.0252193	0.0953775	11240	387	0.0344306	0.619093	25652	0.349597	0.151338	0.930489
002_O21	SPAC25H1.02	jmj1	37312	728	0.0195111	0.104825	55703	805	0.0144516	-0.205997	94548	-0.0714849	0.855191	1.02675	21299	478	0.0224424	-0.0729257	28018	639	0.0228068	0.0248636	50434	-0.0254703	0.613269	1.02909
002_O22	SPAC9.10	thi9	20066	403	0.0200837	0.146553	16312	306	0.0187592	0.170367	37087	0.170412	0.208082	0.998918	13944	349	0.0250287	0.0844319	9471	308	0.0325203	0.536743	24072	0.283518	0.226456	0.990116
002_P01	SPBC1105.11C	hht3	12218	256	0.0209527	0.207662	16774	306	0.0182425	0.130074	29554	0.162608	0.276028	1.03519	23496	713	0.0303456	0.362336	21943	540	0.0246092	0.1346	46692	0.258441	0.169625	0.958668
002_P07	SPBC16E9.14C	zrg17	23028	403	0.0175004	-0.0520826	21136	415	0.0196347	0.236178	44982	0.0969227	0.329277	1.04903	19300	492	0.0254922	0.110907	12137	484	0.0398781	0.830997	32413	0.429475	0.075602	0.732293
002_P08	SPBC543.10	get1	25363	428	0.016875	-0.104588	14626	315	0.021537	0.369586	40732	0.101452	0.340017	1.0483	24473	507	0.0207167	-0.188356	7486	300	0.0400748	0.838097	32766	0.131404	0.380512	1.0117
002_P09	SPBC1778.03C	SPBC1778.03C	16285	305	0.0187289	0.0457922	16460	305	0.0185298	0.152614	33355	0.105227	0.382087	1.05526	15989	410	0.0256426	0.119394	8407	341	0.0405614	0.85551	25147	0.417226	0.103767	0.831196
002_P10	SPBC651.02	SPBC651.02	45218	791	0.017493	-0.0526928	30713	584	0.0190147	0.189888	77306	0.0643634	0.335379	1.04628	53380	1343	0.0251592	0.0919374	15540	366	0.0235521	0.0712588	70629	0.105215	0.341327	1.0042
002_P11	SPBC1861.05	SPBC1861.05	31092	566	0.018204	0.0047853	24642	502	0.0203717	0.289337	56802	0.145975	0.18192	0.975809	35875	1010	0.0281533	0.254154	14090	545	0.0386799	0.786986	51520	0.432982	0.0522255	0.679364
002_P12	SPBC776.01	rpl29	37396	696	0.0186116	0.03673	921	20	0.0217155	0.381496	39033	0.109668	0.3291	1.05059	28724	845	0.0294179	0.317544	515	20	0.038835	0.792757	30104	0.359864	0.124627	0.887616
002_P13	SPBC19F8.08	rps401	28243	494	0.0174911	-0.0528556	14043	255	0.0181585	0.123415	43035	0.0324783	0.535088	1.06143	24276	667	0.0274757	0.219005	10528	325	0.0308701	0.46161	35796	0.306144	0.149956	0.927428
002_P14	SPBC902.02C	ctf18	23123	419	0.0181205	-0.00185167	50410	891	0.0176751	0.0844845	74843	0.0407957	0.40995	1.06243	18994	450	0.0236917	0.00523059	31028	804	0.0259121	0.209026	51276	0.12096	0.334304	1.01191
002_P15	SPBC216.04C	mxr2	8675	169	0.0194813	0.102614	33851	578	0.0170748	0.0346401	43273	0.0204558	0.575666	1.06677	12184	285	0.0233913	-0.0131766	33623	939	0.0279273	0.317078	47031	0.213021	0.217181	0.98372
002_P16	SPBP19A11.02C	SPBP19A11.02C	16302	288	0.0176665	-0.0384535	41893	700	0.0167092	0.00341474	59183	-0.0286915	0.695583	1.05474	15951	466	0.0292145	0.307532	17095	488	0.0285464	0.348708	34000	0.324571	0.139661	0.910255
002_P17	SPBC23G7.11	mag2	38604	729	0.0188841	0.0576951	21486	361	0.0168016	0.0113709	61180	0.066824	0.354719	1.05945	29419	792	0.0269214	0.189602	11547	285	0.0246817	0.138846	42043	0.189577	0.257354	1.00515
002_P18	SPBP8B7.30C	thi5	33041	557	0.0168578	-0.106053	25980	440	0.0169361	0.0228711	60018	-0.0359422	0.723047	1.05189	38822	826	0.0212766	-0.149883	15956	448	0.0280772	0.324801	56052	0.0127542	0.521837	1.03512
002_P19	SPBC28F2.08C	SPBC28F2.08C	46645	1219	0.0261336	0.52643	23236	512	0.0220348	0.402551	71612	0.516326	0.000456772	0.0294012	42671	1299	0.0304422	0.366923	15818	451	0.0285118	0.346962	60239	0.376175	0.0728004	0.722952
002_P20	SPCC1183.02	SPCC1183.02	18845	353	0.0187318	0.0460131	13514	247	0.0182773	0.132825	32959	0.0984882	0.404079	1.06561	24851	655	0.0263571	0.15904	13013	291	0.0223623	-0.00353276	38810	0.116071	0.376776	1.01723
002_P21	SPBC2D10.15C	pth1	35455	681	0.0192074	0.0821924	28737	495	0.0172252	0.0472881	65368	0.0811153	0.30636	1.048	25994	723	0.0278141	0.236666	12861	387	0.030091	0.424732	39965	0.309445	0.137044	0.914013
002_P22	SPCC1259.03	rpa12	5182	137	0.0264377	0.543122	6123	154	0.0251511	0.593389	11596	0.571751	0.0291933	0.523157	6220	183	0.0294212	0.317707	3675	192	0.0522449	1.22069	10270	0.717176	0.0490525	0.668474
003_A01	SPCC1450.05C	rox3	1565	24	0.0153355	-0.223228	6943	176	0.0253493	0.407597	8708	0.312131	0.346698	1.05345	457	17	0.0371991	0.3789	4495	143	0.0318131	0.624624	5112	0.606313	0.212344	0.983028
003_A02	SPCC736.08	cbf11	661	10	0.0151286	-0.242822	12046	331	0.027478	0.523929	13048	0.503171	0.0449089	0.613172	393	20	0.0508906	0.83103	13500	290	0.0214815	0.0580954	14203	0.0722342	0.72642	1.02133
003_A03	SPCC24B10.13	skb5	2897	66	0.0227822	0.347807	7708	156	0.0202387	0.0827697	10827	0.144838	0.676022	1.06237	2772	105	0.0378788	0.405021	5103	126	0.0246914	0.259008	8106	0.466865	0.252513	0.998633
003_A04	SPBC1734.07C	trs8502	1694	27	0.0159386	-0.167574	16468	351	0.0213141	0.157458	18540	0.136486	0.49049	1.05167	472	26	0.0550847	0.945284	11814	251	0.021246	0.0421918	12563	0.0871949	0.738361	1.02125
003_A05	SPCC4B3.13	SPCC4B3.13	2069	52	0.0251329	0.489479	19935	377	0.0189115	-0.0150869	22433	0.0422348	0.713862	1.05015	1543	76	0.0492547	0.783893	32843	700	0.0213135	0.0467709	35162	0.0885595	0.441361	1.05418
003_A06	SPBC1198.07C	SPBC1198.07C	976	22	0.022541	0.332451	12277	297	0.0241916	0.340157	13572	0.34626	0.166099	0.966559	469	15	0.0319829	0.160934	9602	186	0.019371	-0.0911023	10272	-0.0886873	0.806264	1.02138
003_A07	SPCC645.13	SPCC645.13	2385	48	0.0201258	0.168946	9527	207	0.0217277	0.185189	12167	0.177105	0.539375	1.06125	1912	93	0.0486402	0.76578	8109	189	0.0233074	0.175792	10303	0.406993	0.263584	1.00577
003_A08	SPBC13G1.10C	mug81	533	10	0.0187617	0.0676932	3847	96	0.0249545	0.384953	4486	0.354084	0.47705	1.05735	611	25	0.0409165	0.516315	4417	64	0.0144895	-0.509993	5117	-0.261855	0.332463	1.01414
003_A09	SPCC895.09C	ucp12	1739	37	0.0212766	0.249168	11103	298	0.0268396	0.490015	13177	0.462314	0.0651039	0.720483	982	96	0.0977597	1.77287	9170	287	0.0312977	0.601059	10535	0.829905	0.0217312	0.485176
003_A10	SPAC56F8.04C	ppt1	798	28	0.0350877	0.970867	10281	320	0.0311254	0.703743	11427	0.730283	0.00501092	0.18166	447	24	0.0536913	0.908319	9425	177	0.0187798	-0.135813	10073	-0.0598946	0.861308	1.01172
003_A11	SPBC16E9.13	ksp1	5469	96	0.0175535	-0.028342	19218	287	0.0149339	-0.355755	25070	-0.287384	0.257214	1.04007	1981	84	0.0424028	0.567792	16462	332	0.0201677	-0.0329544	18859	0.0878344	0.599669	1.03382
003_A12	SPBC1D7.01	pfd1	1867	43	0.0230316	0.363515	17454	374	0.0214278	0.165133	19738	0.188901	0.335797	1.04551	564	94	0.166667	2.54253	16047	438	0.0272948	0.403629	17143	--	--	0.158655
003_A13	SPAC15F9.02	seh1	11432	152	0.013296	-0.429106	25161	507	0.0201502	0.0764486	37252	-0.0722662	0.977024	1.0031	2716	45	0.0165685	-0.787927	21265	387	0.0181989	-0.181145	24413	-0.236536	0.743482	1.0216
003_A14	SPAC694.06C	mrc1	5031	138	0.0274299	0.615652	12073	356	0.0294873	0.625745	17598	0.6092	0.0061497	0.215513	1219	34	0.0278917	-0.0365321	9275	323	0.0348248	0.755117	10851	0.680684	0.0570428	0.685385
003_A15	SPAC17G6.06	rps2401	4970	87	0.017505	-0.0323298	7174	131	0.0182604	-0.0656307	12362	-0.0768926	0.67651	1.06261	1036	21	0.0202703	-0.497003	4427	112	0.0252993	0.294099	5596	0.197985	0.806092	1.02157
003_A16	SPAC3A11.10C	SPAC3A11.10C	5399	114	0.021115	0.23817	10703	259	0.0241988	0.340589	16475	0.290959	0.196593	0.995273	2248	64	0.0284698	-0.00693882	8542	228	0.0266916	0.37139	11082	0.350598	0.315864	1.01879
003_A18	SPAC1805.01C	ppk6	2556	43	0.0168232	-0.0896505	9935	217	0.021842	0.192755	12751	0.136646	0.635082	1.05257	1065	36	0.0338028	0.240775	7908	179	0.0226353	0.133577	9188	0.174999	0.672032	1.02647
003_A19	SPAC3C7.10	pex13	3064	63	0.0205614	0.199836	9682	167	0.0172485	-0.147877	12976	-0.0693877	0.712871	1.04967	1164	31	0.0266323	-0.103192	8143	242	0.0297188	0.526377	9580	0.466837	0.214881	0.984638
003_A21	SPAC25G10.01	SPAC25G10.01	5350	147	0.0274766	0.618106	24924	516	0.0207029	0.115488	30937	0.209953	0.177451	0.980177	3582	120	0.0335008	0.227828	24355	520	0.0213509	0.0492956	28577	0.110219	0.445054	1.0542
003_A22	SPAC3H8.07C	pac10	1414	31	0.0219236	0.292387	1093	16	0.0146386	-0.384569	2554	-0.0142783	0.545897	1.0615	1455	60	0.0412371	0.527575	1076	32	0.0297398	0.527396	2623	0.776251	0.188373	0.980163
003_A23	SPBC36B7.08C	SPBC36B7.08C	2045	44	0.0215159	0.265303	1180	28	0.0237288	0.312292	3297	0.237721	0.83295	1.02944	906	19	0.0209713	-0.447952	990	32	0.0323232	0.647573	1947	0.341862	0.846772	1.01898
003_B01	SPAC22F3.06C	lon1	1367	33	0.0241405	0.431353	8031	161	0.0200473	0.0690613	9592	0.124654	0.783141	1.0387	364	19	0.0521978	0.86762	5094	143	0.0280722	0.444146	5620	0.483874	0.324627	1.01382
003_B02	SPAC18G6.02C	chp1	754	18	0.0238727	0.415261	10993	209	0.0190121	-0.00743005	11974	0.0294229	0.997186	0.999404	390	12	0.0307692	0.10512	7734	165	0.0213344	0.0481813	8301	0.0378114	0.996565	1.00038
003_B03	SPAC3H5.08C	SPAC3H5.08C	4985	103	0.020662	0.20688	3819	82	0.0214716	0.168081	8989	0.150317	0.732911	1.05216	3776	128	0.0338983	0.244844	2199	41	0.0186448	-0.146222	6144	0.414337	0.393978	1.02078
003_B04	SPAC20G4.02C	fus1	606	18	0.029703	0.730508	10261	210	0.0204658	0.0988702	11095	0.148103	0.656867	1.05594	337	7	0.0207715	-0.461762	6437	100	0.0155352	-0.409458	6881	-0.426145	0.192668	0.978258
003_B05	SPBC215.02	bob1	1597	27	0.0169067	-0.0825043	11690	247	0.0211292	0.144888	13561	0.123183	0.650579	1.05335	316	8	0.0253165	-0.176293	9317	192	0.0206075	-0.00182915	9833	-0.0317329	0.913829	1.0108
003_B06	SPAC26F1.01	sec74	2021	31	0.0153389	-0.2229	14456	283	0.0195766	0.0347858	16791	0.00933395	0.938646	1.01248	494	6	0.0121457	-1.23592	20400	392	0.0192157	-0.102714	21292	-0.155996	0.890664	1.01367
003_B07	SPAC13A11.01C	rga8	1562	45	0.0288092	0.686431	1443	30	0.02079	0.121543	3080	0.398549	0.496852	1.04961	599	8	0.0133556	-1.09892	1176	30	0.0255102	0.306076	1813	0.0125046	0.568035	1.03783
003_B08	SPAC3A11.06	mvp1	1613	31	0.0192188	0.102422	7220	132	0.0182825	-0.0638807	8996	-0.0370805	0.706493	1.0486	412	9	0.0218447	-0.389088	5817	70	0.0120337	-0.777918	6308	-0.742824	0.0310531	0.552289
003_B09	SPAC959.06C	SPAC959.06C	4658	88	0.0188922	0.0776935	11269	219	0.0194338	0.0242235	16234	0.0257871	0.894722	1.02171	1136	26	0.0228873	-0.32182	8915	244	0.0273696	0.407576	10321	0.339945	0.349946	1.00148
003_B10	SPAC688.10	rev3	3521	62	0.0176086	-0.0238164	2142	49	0.0228758	0.259475	5774	0.0499442	0.829578	1.03011	953	17	0.0178384	-0.681382	1336	39	0.0291916	0.500556	2345	0.205034	0.944718	1.00404
003_B11	SPAC14C4.07	SPAC14C4.07	3577	81	0.0226447	0.339072	7540	129	0.0171088	-0.159613	11327	-0.00335521	0.87794	1.0248	995	22	0.0221106	-0.371634	6896	188	0.0272622	0.401903	8101	0.326433	0.442905	1.05387
003_B12	SPAPB1E7.05	gde1	1828	22	0.012035	-0.572862	15962	318	0.0199223	0.0600375	18130	0.0134912	0.895198	1.01967	643	20	0.0311042	0.120741	17223	342	0.0198572	-0.0553382	18228	-0.0669028	0.951033	1.0033
003_B13	SPAC3H8.05C	mms1	4599	120	0.0260926	0.543543	23768	667	0.0280629	0.554318	29154	0.551173	0.00299662	0.122745	746	9	0.0120643	-1.24562	23774	579	0.0243543	0.239181	25108	0.176181	0.363199	1.00914
003_B14	SPBC15D4.10C	amo1	2386	40	0.0167645	-0.0946934	6207	128	0.0206219	0.109828	8761	0.0462504	0.945407	1.01388	586	15	0.0255973	-0.160379	4702	104	0.0221182	0.100239	5407	0.0844917	0.950756	1.00368
003_B15	SPBC29A10.07	pom152	3311	63	0.0190275	0.0879854	5805	112	0.0192937	0.0137829	9291	0.0199051	0.884762	1.0248	694	18	0.0259366	-0.141379	4104	104	0.0253411	0.296483	4920	0.2607	0.728507	1.02153
003_B16	SPBC21C3.14C	SPBC21C3.14C	2699	39	0.0144498	-0.30905	14738	325	0.0220518	0.206551	17801	0.14081	0.493539	1.05391	487	11	0.0225873	-0.340859	9313	195	0.0209385	0.0211582	10006	-0.0138851	0.958869	1.00383
003_B17	SPCC1682.15	mug122	2314	41	0.0177182	-0.0148643	6453	138	0.0213854	0.162278	8946	0.108827	0.857174	1.02718	649	14	0.0215716	-0.407232	5168	138	0.0267028	0.371992	5969	0.300048	0.588955	1.03867
003_B18	SPBC31E1.02C	pmr1	2323	38	0.0163582	-0.130089	16291	348	0.0213615	0.160664	19000	0.131236	0.49619	1.05103	533	12	0.0225141	-0.345542	11133	219	0.0196712	-0.0689096	11897	-0.100093	0.83071	1.01912
003_B19	SPCC584.11C	SPCC584.11C	903	11	0.0121816	-0.555394	5553	123	0.0221502	0.212971	6590	0.132544	0.89796	1.01767	664	18	0.0271084	-0.0776269	8992	133	0.0147909	-0.480286	9807	-0.440625	0.219682	0.986531
003_B20	SPBC947.10	dsc1	1060	30	0.0283019	0.660799	5996	158	0.0263509	0.463504	7244	0.492833	0.136412	0.894476	729	26	0.0356653	0.318152	6811	175	0.0256937	0.316418	7741	0.328883	0.453418	1.04876
003_B22	SPCC188.08C	ubp5	1625	31	0.0190769	0.0917291	11084	238	0.0214724	0.168135	12978	0.160779	0.559028	1.06088	1043	27	0.0258869	-0.144148	11805	314	0.0265989	0.366368	13189	0.322552	0.308042	1.01435
003_B23	SPAC16.01	rho2	4502	97	0.021546	0.267319	15784	358	0.0226812	0.247149	20741	0.244405	0.21257	0.996203	1424	42	0.0294944	0.0440715	15671	364	0.0232276	0.170843	17501	0.162229	0.480271	1.03982
003_C01	SPCC1450.11C	cek1	1549	25	0.0161394	-0.149508	5940	133	0.0223906	0.228544	7647	0.156103	0.777622	1.03881	203	8	0.0394089	0.462152	4686	102	0.021767	0.0771422	4999	0.0842164	0.924255	1.00433
003_C02	SPAC30.03C	tsn1	967	17	0.0175801	-0.0261524	10599	202	0.0190584	-0.0039207	11785	6.38486e-05	0.902253	1.01596	267	14	0.0524345	0.874146	8935	188	0.0210409	0.028195	9404	0.0486601	0.927544	1.00237
003_C03	SPCC320.03	SPCC320.03	3103	75	0.0241702	0.433128	8402	198	0.0235658	0.302348	11778	0.325663	0.231229	1.01151	2838	107	0.0377026	0.398296	8436	170	0.0201517	-0.0340943	11551	0.211211	0.523166	1.03515
003_C04	SPBC21B10.13C	yox1	295	7	0.0237288	0.406541	2588	79	0.0305255	0.675667	2969	0.655789	0.149067	0.920072	181	7	0.038674	0.434997	3830	90	0.0234987	0.187583	4108	0.188347	0.930599	1.00292
003_C05	SPCC4B3.15	mid1	918	25	0.0272331	0.605263	4844	108	0.0222956	0.222413	5895	0.285808	0.536342	1.06124	516	22	0.0426357	0.575692	4342	112	0.0257946	0.322069	4992	0.378123	0.513893	1.03635
003_C06	SPAC22H10.09	SPAC22H10.09	649	17	0.0261941	0.549145	4473	115	0.0257098	0.427971	5254	0.444782	0.269841	1.04299	302	11	0.0364238	0.348514	4462	131	0.029359	0.508806	4906	0.48997	0.353135	1.00241
003_C07	SPCC663.04	rpl39	2371	39	0.0164488	-0.122121	6905	144	0.0208545	0.126008	9459	0.0592919	0.987995	1.00101	556	16	0.028777	0.00854643	5329	116	0.0217677	0.07719	6017	0.0797478	0.977461	1.00459
003_C08	SPBC21D10.09C	rkr1	608	6	0.00986842	-0.859208	1507	26	0.0172528	-0.147516	2147	-0.323563	0.13554	0.894337	308	10	0.0324675	0.182629	1894	30	0.0158395	-0.381472	2242	-0.22449	0.280637	1.02607
003_C09	SPCC965.06	osr2	3076	52	0.0169051	-0.0826432	12482	256	0.0205095	0.101947	15866	0.0642967	0.773928	1.04004	381	16	0.0419948	0.55384	9031	163	0.0180489	-0.193084	9591	-0.158289	0.642279	1.01501
003_C10	SPBC215.05	gpd1	1485	14	0.00942761	-0.925135	9537	190	0.0199224	0.0600442	11226	-0.0327939	0.782888	1.03924	762	17	0.0223097	-0.358697	7503	125	0.01666	-0.308609	8407	-0.304872	0.361528	1.00895
003_C11	SPBC25B2.02C	mam1	4121	53	0.012861	-0.477101	8021	142	0.0177035	-0.110311	12337	-0.237509	0.282125	1.03228	1190	30	0.0252101	-0.182368	5458	92	0.016856	-0.291737	6770	-0.209787	0.460351	1.04408
003_C12	SPBC16H5.05C	cyp7	2721	62	0.0227857	0.348032	8015	158	0.019713	0.0448023	10956	0.11407	0.763098	1.04372	975	32	0.0328205	0.198229	5784	153	0.0264523	0.358394	6944	0.366968	0.427656	1.0428
003_C13	SPBC902.04	rmn1	3801	77	0.0202578	0.17838	4223	88	0.0208383	0.124887	8189	0.119095	0.859484	1.02411	631	12	0.0190174	-0.589046	3565	105	0.029453	0.513417	4313	0.393746	0.534173	1.03929
003_C14	SPAC767.01C	vps1	1039	20	0.0192493	0.104705	224	11	0.0491071	1.36159	1294	0.374437	0.714659	1.04985	312	9	0.0288462	0.0120103	210	5	0.0238095	0.206541	536	--	--	0.158655
003_C15	SPCC962.04	rps1201	3808	74	0.0194328	0.118392	11581	215	0.0185649	-0.041771	15678	-0.011807	0.963162	1.00723	597	14	0.0234506	-0.286745	7351	171	0.0232621	0.172986	8133	0.133186	0.801875	1.02116
003_C16	SPAC9.07C	SPAC9.07C	5173	63	0.0121786	-0.555749	9553	184	0.019261	0.0113322	14973	-0.174832	0.446463	1.06355	1135	18	0.015859	-0.851064	7078	165	0.0233117	0.176054	8396	0.0701866	0.923028	1.00578
003_C17	SPAC1805.04	nup132	1661	31	0.0186635	0.0601168	2738	60	0.0219138	0.197492	4490	0.127714	0.970563	1.00531	311	8	0.0257235	-0.153283	1661	44	0.0264901	0.360453	2024	0.313176	0.889785	1.01377
003_C18	SPAC2C4.14C	ppk11	1527	22	0.0144073	-0.313296	5743	102	0.0177608	-0.105655	7394	-0.150664	0.388836	1.05723	383	9	0.0234987	-0.283788	6540	88	0.0134557	-0.616785	7020	-0.599088	0.0795208	0.740626
003_C20	SPBC2G2.17C	SPBC2G2.17C	2461	48	0.0195043	0.12369	11192	216	0.0192995	0.0142156	13917	0.0303429	0.93808	1.01256	677	23	0.0339734	0.248037	11311	216	0.0190965	-0.111693	12227	-0.0902562	0.861387	1.01143
003_C21	SPAC12B10.05	icp55	9	0	0	--	28985	592	0.0204244	0.0959429	29586	0.108866	0.407537	1.06582	669	23	0.0343797	0.265187	27114	578	0.0213174	0.0470335	28384	0.0274868	0.608111	1.03422
003_C22	SPAC2F3.02	SPAC2F3.02	1882	49	0.0260361	0.540416	8432	193	0.022889	0.260306	10556	0.309426	0.290706	1.03486	899	18	0.0200222	-0.514765	8592	206	0.0239758	0.21658	9715	0.153191	0.695367	1.02578
003_C23	SPBC1734.12C	alg12	2924	55	0.0188098	0.0713889	11838	246	0.0207805	0.120885	15063	0.106898	0.658336	1.05454	431	13	0.0301624	0.0763832	6812	178	0.0261304	0.340729	7434	0.313238	0.492219	1.03646
003_C24	SPBC3F6.01C	SPBC3F6.01C	1153	17	0.0147441	-0.279957	5279	97	0.0183747	-0.0566278	6546	-0.0952825	0.489585	1.05259	738	27	0.0365854	0.354898	3964	83	0.0209384	0.0211563	4812	0.140481	0.974382	1.00503
003_D01	SPBC19F8.03C	yap18	2489	35	0.0140619	-0.348311	7628	143	0.0187467	-0.0277094	10295	-0.105881	0.550069	1.05723	431	8	0.0185615	-0.624057	4763	86	0.0180558	-0.192532	5288	-0.229861	0.380644	1.0112
003_D02	SPAC1952.09C	SPAC1952.09C	384	6	0.015625	-0.196243	10154	189	0.0186134	-0.0380098	10733	-0.033104	0.768357	1.04187	233	14	0.0600858	1.07066	8594	181	0.0210612	0.02959	9022	0.0578032	0.923096	1.0055
003_D03	SPAC926.09C	fas1	3020	73	0.0241722	0.433249	9499	206	0.0216865	0.182449	12798	0.235169	0.377199	1.05844	2575	95	0.0368932	0.366986	7671	188	0.0245079	0.248248	10529	0.380065	0.290946	1.02107
003_D04	SPAC22E12.11C	set3	2306	37	0.0160451	-0.157967	6800	151	0.0222059	0.216594	9294	0.124866	0.794675	1.03656	258	8	0.0310078	0.11626	5952	138	0.0231855	0.168224	6356	0.147627	0.862487	1.01008
003_D05	SPAC15A10.10	mde6	828	11	0.013285	-0.430299	6226	95	0.0152586	-0.324726	7160	-0.333426	0.124359	0.879436	325	6	0.0184615	-0.631846	6461	126	0.0195016	-0.0814037	6918	-0.125771	0.610989	1.03353
003_D06	SPAC26H5.05	mga2	1047	13	0.0124164	-0.527849	11317	228	0.0201467	0.0761944	12605	0.0419106	0.937355	1.01282	233	8	0.0343348	0.263301	8977	191	0.0212766	0.0442693	9409	0.0258196	0.976874	1.00431
003_D07	SPAC823.10C	SPAC823.10C	1576	26	0.0164975	-0.117855	25845	483	0.0186883	-0.0322099	27930	-0.0285925	0.892885	1.02109	396	12	0.030303	0.0830934	26367	539	0.0204422	-0.0134462	27314	-0.0438633	0.775457	1.01969
003_D08	SPAC3C7.08C	elf1	1015	19	0.0187192	0.0644203	3471	76	0.0218957	0.1963	4581	0.161521	0.93449	1.01354	263	5	0.0190114	-0.589503	3184	36	0.0113065	-0.867841	3488	-0.835393	0.0131375	0.397662
003_D09	SPAC27D7.13C	ssm4	1202	25	0.0207987	0.216392	5896	113	0.0191655	0.0041665	7236	0.0382068	0.860663	1.02319	549	12	0.0218579	-0.388212	5244	132	0.0251716	0.2868	5937	0.22801	0.725791	1.02319
003_D10	SPAC6F6.13C	SPAC6F6.13C	1899	43	0.0226435	0.338997	7479	141	0.0188528	-0.01957	9562	0.0513766	0.991366	1.00153	423	8	0.0189125	-0.597026	4019	46	0.0114456	-0.850201	4496	-0.803926	0.0176417	0.478759
003_D11	SPAC1782.09C	clp1	2214	30	0.0135501	-0.401792	9866	180	0.0182445	-0.0668881	12290	-0.123208	0.542609	1.06231	657	13	0.0197869	-0.531822	6247	130	0.02081	0.0122781	7047	-0.035165	0.793405	1.01737
003_D12	SPAPYUG7.03C	mid2	2965	51	0.0172007	-0.0576342	3134	62	0.019783	0.0499152	6212	-0.0312989	0.632987	1.05298	811	36	0.0443896	0.633854	1365	23	0.0168498	-0.292265	2235	0.353361	0.794008	1.0169
003_D13	SPAC4A8.10	SPAC4A8.10	3878	56	0.0144404	-0.309985	14564	272	0.0186762	-0.0331478	18770	-0.0902763	0.753264	1.04661	275	17	0.0618182	1.11166	9487	154	0.0162327	-0.346092	9933	-0.276928	0.43835	1.05258
003_D14	SPBC1685.13	fhn1	12186	225	0.0184638	0.044601	13810	229	0.0165822	-0.204714	26450	-0.116574	0.758032	1.04449	6141	149	0.0242631	-0.237602	5900	104	0.0176271	-0.227201	12294	-0.0144936	0.968499	1.00192
003_D15	SPBC29A3.14C	trt1	2333	40	0.0171453	-0.0622857	2614	47	0.0179801	-0.0879462	5034	-0.106516	0.429486	1.06661	437	5	0.0114416	-1.32207	2533	69	0.0272404	0.400751	3044	0.231387	0.938043	1.00578
003_D16	SPBC23G7.04C	nif1	5362	74	0.0138008	-0.375345	22465	422	0.0187848	-0.0247839	28323	-0.0871223	0.886996	1.02363	589	10	0.0169779	-0.752708	14197	303	0.0213425	0.0487336	15099	-0.00374497	0.871316	1.01177
003_D17	SPCC16A11.08	atg20	678	12	0.0176991	-0.0164221	885	20	0.0225989	0.241903	1595	0.112777	0.771346	1.04011	495	10	0.020202	-0.501869	667	12	0.017991	-0.197722	1184	-0.164782	0.317649	1.01829
003_D18	SPBC354.10	def1	1220	35	0.0286885	0.680374	10861	198	0.0182304	-0.0680044	12314	0.0266131	0.996077	1.0002	447	5	0.0111857	-1.35472	8915	198	0.0222098	0.106196	9565	0.0309152	0.959792	1.0038
003_D19	SPCC663.14C	trp663	4577	95	0.020756	0.213426	16250	284	0.0174769	-0.128897	21206	-0.0572342	0.907562	1.01577	749	24	0.0320427	0.163628	12552	176	0.0140217	-0.55734	13501	-0.497211	0.200724	0.975122
003_D20	SPBP8B7.07C	set6	2014	33	0.0163853	-0.127697	13632	249	0.0182658	-0.0651993	15928	-0.0710757	0.768177	1.04253	524	8	0.0152672	-0.905935	15993	349	0.021822	0.0807884	16874	0.0262966	0.766156	1.01938
003_D21	SPAC10F6.11C	atg17	2502	43	0.0171863	-0.0588445	25132	479	0.0190594	-0.00384767	28156	-0.00337161	0.79506	1.03663	587	13	0.0221465	-0.369289	22016	447	0.0203034	-0.0232756	23063	-0.0605562	0.862204	1.01013
003_D22	SPCC18B5.07C	nup61	1058	19	0.0179584	0.00456042	7138	123	0.0172317	-0.149281	8338	-0.128078	0.455219	1.06195	580	20	0.0344828	0.269507	7523	201	0.0267181	0.372817	8324	0.361843	0.380491	1.0125
003_D23	SPAC1751.01C	gti1	2429	52	0.021408	0.25805	14527	304	0.0209266	0.130987	17312	0.149104	0.481033	1.05727	1618	57	0.0352287	0.300382	18677	391	0.0209348	0.0209078	20743	0.0566986	0.634327	1.01829
003_D24	SPCC663.15C	SPCC663.15C	759	22	0.0289855	0.695232	2360	43	0.0182203	-0.068798	3184	0.138379	0.915801	1.01527	326	13	0.0398773	0.479199	1480	37	0.025	0.27693	1856	0.383454	0.783757	1.01827
003_E01	SPCC1620.12C	SPCC1620.12C	994	16	0.0160966	-0.153345	11609	272	0.0234301	0.294015	12891	0.271325	0.299692	1.041	404	14	0.0346535	0.276631	9930	226	0.0227593	0.141459	10574	0.12996	0.711766	1.02593
003_E02	SPACUNK4.08	SPACUNK4.08	1127	28	0.0248447	0.47284	5528	98	0.0177279	-0.108324	6781	-6.38515e-05	0.735367	1.05138	484	15	0.0309917	0.115515	3791	87	0.0229491	0.153439	4377	0.168897	0.948652	1.00416
003_E03	SPCC330.02	rhp7	3526	57	0.0161656	-0.14717	15244	318	0.0208607	0.126437	19145	0.0774849	0.656808	1.05639	4744	208	0.0438449	0.616039	17824	461	0.025864	0.325948	23237	0.482052	0.0750473	0.729164
003_E04	SPBC29A3.13	pdp1	1758	37	0.0210466	0.233491	4643	132	0.0284299	0.573061	6570	0.479677	0.170163	0.968761	276	8	0.0289855	0.018963	4871	90	0.0184767	-0.159291	5245	-0.156626	0.489011	1.03874
003_E05	SPCC569.07	SPCC569.07	4207	58	0.0137865	-0.376838	16757	275	0.0164111	-0.21968	21297	-0.253369	0.312005	1.04244	536	13	0.0242537	-0.238162	15181	345	0.0227258	0.139331	16075	0.101958	0.622349	1.02359
003_E06	SPBC21C3.18	spo4	2228	42	0.018851	0.0745407	6901	138	0.0199971	0.0654431	9309	0.0584912	0.996155	0.99996	465	8	0.0172043	-0.733599	4891	110	0.0224903	0.124304	5474	0.0538832	0.892378	1.01379
003_E07	SPCC70.06	SPCC70.06	2609	54	0.0206976	0.209363	16092	276	0.0171514	-0.156023	19031	-0.101626	0.719045	1.05335	560	18	0.0321429	0.168129	8124	145	0.0178484	-0.209207	8847	-0.177235	0.583291	1.03857
003_E08	SPBC1861.07	SPBC1861.07	1096	13	0.0118613	-0.593836	10161	204	0.0200768	0.0711789	11474	0.0258956	0.975955	1.00495	425	6	0.0141176	-1.01887	8382	183	0.0218325	0.0814792	8996	0.0159878	0.985517	1.00272
003_E09	SPCC965.11C	agp3	1942	31	0.0159629	-0.165374	8933	175	0.0195903	0.0357904	11081	0.000651923	0.883282	1.02497	767	16	0.0208605	-0.455595	8450	195	0.0230769	0.161453	9428	0.109198	0.797187	1.01766
003_E10	SPCC23B6.03C	tel1	4233	101	0.0238601	0.414504	12235	279	0.0228034	0.254903	16848	0.285357	0.1995	0.998767	1509	41	0.0271703	-0.0743376	10376	188	0.0181187	-0.187516	12114	-0.13947	0.752034	1.01868
003_E11	SPAC23A1.06C	cmk2	4952	82	0.016559	-0.112487	12241	220	0.0179724	-0.0885657	17495	-0.10825	0.674067	1.06247	828	28	0.0338164	0.241355	9758	222	0.0227506	0.140904	10836	0.154095	0.654082	1.02389
003_E12	SPAC4F10.20	grx1	2940	50	0.0170068	-0.0739874	4984	114	0.0228732	0.25931	8088	0.128418	0.836667	1.0304	646	24	0.0371517	0.37706	2922	80	0.0273785	0.408046	3672	0.45772	0.480628	1.03845
003_E13	SPBC428.12C	SPBC428.12C	13846	195	0.0140835	-0.346094	59977	831	0.0138553	-0.463909	74849	-0.446089	0.0516239	0.661877	1756	27	0.0153759	-0.895702	39810	572	0.0143682	-0.522114	42165	-0.558524	0.239854	0.994809
003_E14	SPAC521.04C	sst1	2256	39	0.0172872	-0.0503923	14427	231	0.0160116	-0.255226	16953	-0.226396	0.34294	1.05115	689	21	0.030479	0.0914448	13472	232	0.0172209	-0.260837	14414	-0.248462	0.580328	1.04095
003_E16	SPBC1778.09	SPBC1778.09	3676	60	0.0163221	-0.133274	454	8	0.0176211	-0.11704	4198	-0.201584	0.257515	1.03862	362	26	0.0718232	1.32808	247	12	0.048583	1.23545	647	--	--	0.158655
003_E17	SPBC1271.15C	SPBC1271.15C	1954	36	0.0184237	0.0414671	18925	381	0.0201321	0.0751499	21296	0.0770178	0.617484	1.06018	227	10	0.0440529	0.622867	10478	212	0.0202329	-0.0282972	10927	-0.0334009	0.947471	1.00493
003_E18	SPCC24B10.22	pog1	977	15	0.0153531	-0.221567	10969	293	0.0267116	0.483121	12254	0.445426	0.086359	0.791792	650	17	0.0261538	-0.129346	8114	174	0.0214444	0.055604	8955	0.0382354	0.968047	1.00244
003_E19	SPCC338.06C	SPCC338.06C	6715	117	0.0174237	-0.0390501	20053	363	0.018102	-0.0781964	27248	-0.078452	0.908507	1.01611	806	17	0.0210918	-0.439686	10583	184	0.0173864	-0.247041	11590	-0.266121	0.492457	1.03627
003_E20	SPBC1703.14C	top1	907	15	0.016538	-0.114311	7072	171	0.0241799	0.339458	8165	0.300046	0.39248	1.05712	392	14	0.0357143	0.320133	6295	143	0.0227164	0.138739	6844	0.145658	0.83964	1.01778
003_E21	SPAC1F5.09C	shk2	3103	54	0.0174025	-0.0408037	19614	353	0.0179973	-0.0865634	23124	-0.0797205	0.853518	1.02748	520	20	0.0384615	0.427048	10059	145	0.014415	-0.517432	10744	-0.444413	0.227302	0.989693
003_E22	SPCC553.08C	ria1	599	16	0.0267112	0.577345	4817	131	0.0271953	0.509012	5563	0.519539	0.162288	0.96395	475	25	0.0526316	0.87956	3517	135	0.038385	0.895544	4152	0.917212	0.0561906	0.685612
003_E23	SPAC6G9.15C	SPAC6G9.15C	3049	64	0.0209905	0.229636	8386	165	0.0196756	0.0420635	11664	0.0809142	0.841549	1.02798	1621	98	0.0604565	1.07953	5934	136	0.0229188	0.151532	7789	0.545329	0.183146	0.977193
003_E24	SPBC17A3.06	SPBC17A3.06	1778	30	0.0168729	-0.0853922	11711	278	0.0237384	0.312873	13797	0.27017	0.280886	1.03374	500	12	0.024	-0.253334	10610	214	0.0201697	-0.0328119	11336	-0.0612119	0.899229	1.01425
003_F01	SPAC1F8.04C	SPAC1F8.04C	5696	153	0.026861	0.585411	10676	290	0.0271637	0.507334	16815	0.515099	0.0223927	0.449851	1996	73	0.0365731	0.354416	14060	611	0.0434566	1.07458	16740	1.00521	0.00188197	0.141058
003_F03	SPAC1687.19C	qtr1	1134	19	0.0167549	-0.0955206	4602	88	0.0191221	0.000894701	5843	-0.0214831	0.644818	1.05267	275	16	0.0581818	1.0242	4247	85	0.0200141	-0.0439793	4623	0.0736466	0.878148	1.01038
003_F04	SPAC22F3.04	mug62	835	14	0.0167665	-0.0945206	6165	97	0.015734	-0.280464	7111	-0.255844	0.209684	0.999006	292	8	0.0273973	-0.0623371	4273	84	0.0196583	-0.0698581	4657	-0.0746568	0.599463	1.03517
003_F06	SPAC29A4.11	rga3	1013	23	0.0227048	0.3429	11859	222	0.01872	-0.0297705	13117	0.0075685	0.964291	1.00608	183	6	0.0327869	0.19675	5101	100	0.019604	-0.0738501	5390	-0.0813139	0.624916	1.02141
003_F07	SPAC30.02C	SPAC30.02C	1489	30	0.0201478	0.170519	3348	75	0.0224014	0.229243	4942	0.197228	0.817067	1.03164	471	15	0.0318471	0.154795	2300	50	0.0217391	0.0752962	2836	0.144357	0.877014	1.01093
003_F08	SPAC3C7.13C	SPAC3C7.13C	1313	28	0.0213252	0.252461	9474	154	0.016255	-0.233463	10969	-0.166332	0.413207	1.06562	270	9	0.0333333	0.220597	5368	109	0.0203055	-0.0231265	5756	-0.0201443	0.759776	1.02038
003_F09	SPAC12B10.03	bun62	1675	33	0.0197015	0.138206	4822	99	0.0205309	0.103449	6629	0.101715	0.984006	1.00309	679	15	0.0220913	-0.37289	3412	87	0.0254982	0.3054	4193	0.232368	0.837278	1.01806
003_F10	SPAC6G9.10C	sen1	5999	98	0.0163361	-0.13204	19817	370	0.0186708	-0.0335611	26284	-0.062734	0.95702	1.01086	1625	29	0.0178462	-0.680756	12172	270	0.0221821	0.104395	14096	0.0301151	0.820332	1.0187
003_F11	SPAC1783.01	SPAC1783.01	2331	43	0.018447	0.0432883	55639	824	0.0148098	-0.3678	58837	-0.340252	0.187094	0.983492	816	20	0.0245098	-0.22301	55261	811	0.0146758	-0.491558	56908	-0.518237	0.304826	1.0133
003_F12	SPBC1105.04C	cbp1	5912	122	0.020636	0.205064	19703	355	0.0180176	-0.0849441	26092	-0.0239766	0.898567	1.01689	1678	37	0.0220501	-0.375586	19329	328	0.0169693	-0.282069	21372	-0.288649	0.599243	1.03592
003_F13	SPAC637.09	SPAC637.09	5599	84	0.0150027	-0.254879	22194	367	0.016536	-0.208737	28244	-0.222571	0.425467	1.06417	4009	79	0.0197057	-0.537758	24701	542	0.0219424	0.0887253	29331	0.0273641	0.600247	1.03369
003_F14	SPBC1685.14C	SPBC1685.14C	12018	182	0.015144	-0.241358	31522	504	0.0159888	-0.257283	44226	-0.26511	0.354102	1.06062	3521	105	0.0298211	0.0599635	17642	281	0.0159279	-0.373442	21549	-0.218619	0.751253	1.01849
003_F15	SPBC359.03C	aat1	1712	27	0.015771	-0.182823	18860	288	0.0152704	-0.323609	20887	-0.306307	0.208824	1.00096	1043	18	0.0172579	-0.729111	8846	134	0.0151481	-0.445862	10041	-0.465501	0.19785	0.976225
003_F16	SPBC23G7.13C	SPBC23G7.13C	2350	50	0.0212766	0.249168	6262	101	0.016129	-0.244688	8763	-0.110849	0.504669	1.05343	211	2	0.00947867	-1.59361	2801	39	0.0139236	-0.567466	3053	-0.640774	0.043284	0.622183
003_F17	SPCC1827.07C	SPCC1827.07C	1375	16	0.0116364	-0.621459	7470	171	0.0228916	0.260468	9032	0.159127	0.705804	1.05005	355	14	0.0394366	0.463167	3040	59	0.0194079	-0.0883544	3468	0.0188091	0.694152	1.02495
003_F18	SPBC3H7.03C	SPBC3H7.03C	1421	34	0.0239268	0.418529	8791	305	0.0346946	0.860362	10551	0.810043	0.0023641	0.102142	567	17	0.0299824	0.0677454	4753	134	0.0281927	0.450325	5471	0.419375	0.421027	1.04116
003_F19	SPAC4G8.03C	SPAC4G8.03C	3632	66	0.0181718	0.0216025	13481	251	0.0186188	-0.037588	17430	-0.0315869	0.932148	1.01379	664	26	0.0391566	0.452888	7783	154	0.0197867	-0.060466	8627	0.00581014	0.948542	1.00438
003_F20	SPBP8B7.18C	SPBP8B7.18C	11627	207	0.0178034	-0.0079475	31956	540	0.0168982	-0.177475	44330	-0.143634	0.771542	1.03949	1644	32	0.0194647	-0.555507	16851	317	0.0188119	-0.133349	18844	-0.169584	0.823375	1.01966
003_F21	SPAC11D3.14C	SPAC11D3.14C	1348	25	0.018546	0.0510082	11468	219	0.0190966	-0.00103078	13060	0.00795808	0.964014	1.00612	1097	22	0.0200547	-0.512429	8671	164	0.0189136	-0.125573	9954	-0.156508	0.656719	1.02547
003_F22	SPCC191.11	inv1	1240	23	0.0185484	0.0511944	9539	148	0.0155153	-0.300661	10950	-0.255204	0.240517	1.01961	843	22	0.0260973	-0.13247	10411	165	0.0158486	-0.380641	11441	-0.353075	0.350959	1.00165
003_F23	SPAC1782.08C	rex3	1314	34	0.0258752	0.53147	7568	125	0.0165169	-0.210404	9041	-0.0809067	0.58719	1.06375	517	20	0.0386847	0.435395	7588	118	0.0155509	-0.408003	8243	-0.317892	0.339818	1.00635
003_F24	SPCC737.03C	ima1	1177	26	0.0220901	0.303298	8689	204	0.023478	0.296959	10096	0.30012	0.322059	1.05152	847	34	0.0401417	0.488732	7446	149	0.0200107	-0.0442233	8476	0.0562018	0.949496	1.00404
003_G01	SPCC1840.07C	SPCC1840.07C	5470	98	0.0179159	0.00114155	11966	229	0.0191376	0.00205879	17763	-0.0137555	0.998576	0.99921	941	29	0.0308183	0.107418	10828	282	0.0260436	0.33593	12080	0.316247	0.33987	1.00555
003_G02	SPAC4F10.02	aap1	742	17	0.0229111	0.355944	1159	29	0.0250216	0.388824	1947	0.353898	0.692947	1.05531	513	13	0.0253411	-0.174888	723	26	0.0359613	0.801446	1275	0.57212	0.550428	1.03882
003_G03	SPCC330.07C	SPCC330.07C	1724	21	0.012181	-0.55547	9898	179	0.0180845	-0.0795972	11822	-0.137835	0.495832	1.05098	728	32	0.043956	0.619693	9166	122	0.0133101	-0.632481	10048	-0.447371	0.215796	0.98453
003_G04	SPBC30B4.06C	SPBC30B4.06C	923	15	0.0162514	-0.139539	10548	202	0.0191505	0.00303798	11688	-0.00127314	0.895148	1.02035	338	12	0.035503	0.311571	7140	139	0.0194678	-0.0839092	7629	-0.0718516	0.744395	1.02152
003_G06	SPBC18H10.15	cdk11	2167	35	0.0161514	-0.148444	9751	176	0.0180494	-0.0823945	12129	-0.0968762	0.61298	1.06227	903	14	0.0155039	-0.88374	8035	163	0.0202862	-0.024496	9115	-0.0999504	0.743755	1.02108
003_G08	SPBC17D11.04C	nto1	4764	91	0.0191016	0.0935938	12690	239	0.0188337	-0.0210293	17784	-0.00206869	0.957037	1.01054	2140	63	0.0294393	0.0413723	7370	129	0.0175034	-0.237364	9702	-0.0720867	0.822468	1.01974
003_G10	SPBC947.08C	hip4	2113	46	0.02177	0.282242	37018	617	0.0166676	-0.197304	39794	-0.16028	0.687803	1.05718	545	16	0.0293578	0.0373751	22832	376	0.0164681	-0.325323	23769	-0.339912	0.520742	1.03622
003_G11	SPBC530.11C	SPBC530.11C	18	13	0.722222	5.33427	88	3	0.0340909	0.835039	122	--	--	0.158655	31	2	0.0645161	1.17329	88	4	0.0454545	1.13943	125	--	--	0.158655
003_G12	SPCC162.01C	SPCC162.01C	54	5	0.0925926	2.3708	77	2	0.025974	0.442722	138	--	--	0.158655	22	2	0.0909091	1.66806	140	9	0.0642857	1.6395	173	--	--	0.158655
003_G13	SPBC16A3.18	cip1	3759	66	0.0175579	-0.0279823	31848	586	0.0183999	-0.05465	36259	-0.0482659	0.887905	1.02206	1014	26	0.025641	-0.157915	23070	382	0.0165583	-0.317443	24492	-0.325182	0.555669	1.03628
003_G14	SPAC19B12.06C	SPAC19B12.06C	2830	37	0.0130742	-0.453376	15925	225	0.0141287	-0.435716	19017	-0.438685	0.0619199	0.705037	722	15	0.0207756	-0.461477	8828	113	0.0128002	-0.688834	9678	-0.663105	0.0658748	0.702963
003_G15	SPAC3C7.07C	SPAC3C7.07C	4217	56	0.0132796	-0.43089	40911	689	0.0168414	-0.182333	45873	-0.197759	0.570105	1.06397	755	30	0.0397351	0.474045	29064	524	0.0180292	-0.194665	30373	-0.192022	0.899901	1.01392
003_G16	SPAC31A2.16	gef2	2894	61	0.0210781	0.235645	48976	808	0.0164979	-0.212067	52739	-0.176521	0.664623	1.05656	961	16	0.0166493	-0.780905	31045	533	0.0171686	-0.265223	32555	-0.307212	0.648869	1.0203
003_G17	SPBC1734.09	yea4	2483	33	0.0132904	-0.429718	57108	996	0.0174406	-0.131895	60620	-0.1329	0.858716	1.02513	1381	29	0.0209993	-0.446029	52047	882	0.0169462	-0.284034	54339	-0.315821	0.69399	1.02519
003_G18	SPBC1773.16C	SPBC1773.16C	3438	66	0.0191972	0.100797	38380	706	0.018395	-0.0550344	42590	-0.0365002	0.796804	1.03463	615	15	0.0243902	-0.230065	24012	481	0.0200317	-0.0427167	25123	-0.0755766	0.872244	1.01098
003_G19	SPAC23C4.06C	SPAC23C4.06C	2044	41	0.0200587	0.164129	46927	845	0.0180067	-0.0858147	49857	-0.065598	0.880273	1.02487	654	17	0.0259939	-0.138196	26684	506	0.0189627	-0.121836	27861	-0.149773	0.979792	1.0037
003_G20	SPAC26H5.02C	SPAC26H5.02C	2348	43	0.0183135	0.0328049	35074	539	0.0153675	-0.314465	38004	-0.283845	0.296973	1.03842	534	15	0.0280899	-0.0263178	19739	328	0.0166168	-0.312351	20616	-0.327027	0.515646	1.03656
003_G21	SPCC569.05C	SPCC569.05C	41	1	0.0243902	0.446205	21072	385	0.0182707	-0.0648166	21499	-0.0505078	0.936562	1.01266	710	23	0.0323944	0.179374	13698	320	0.0233611	0.179109	14751	0.165663	0.526631	1.0355
003_G22	SPBPJ4664.06	gpt1	1716	19	0.0110723	-0.69315	9710	130	0.0133883	-0.513379	11575	-0.537985	0.0211986	0.442784	502	22	0.0438247	0.615376	6724	104	0.015467	-0.415806	7352	-0.283521	0.366318	1.00626
003_G23	SPAC6C3.08	nas6	538	9	0.0167286	-0.0977805	16047	368	0.0229326	0.263054	16962	0.263708	0.232787	1.0141	880	15	0.0170455	-0.746982	18477	258	0.0139633	-0.563358	19630	-0.58963	0.152142	0.931796
003_G24	SPAC9G1.10C	SPAC9G1.10C	1751	42	0.0239863	0.422111	10898	191	0.0175262	-0.124839	12882	-0.0396704	0.804107	1.03222	514	9	0.0175097	-0.708212	6888	170	0.0246806	0.25838	7581	0.188297	0.715681	1.02361
003_H01	SPAC2C4.17C	msy2	562	16	0.0284698	0.66933	623	12	0.0192616	0.0113825	1213	0.319563	0.82684	1.03281	362	14	0.038674	0.434997	494	21	0.0425101	1.04281	891	--	--	0.158655
003_H02	SPAC19G12.02C	pms1	1179	20	0.0169635	-0.0776631	5203	93	0.0178743	-0.0964608	6495	-0.0967348	0.485065	1.05583	266	7	0.0263158	-0.12044	3852	61	0.0158359	-0.381797	4186	-0.362085	0.200707	0.976546
003_H03	SPAC9G1.02	wis4	1014	16	0.0157791	-0.182085	8108	155	0.0191169	0.000502383	9293	-0.0144028	0.781597	1.04015	249	10	0.0401606	0.489414	6911	144	0.0208363	0.0141044	7314	0.019223	0.918851	1.00997
003_H04	SPAC22G7.11C	cum1	1913	32	0.0167277	-0.0978643	5684	96	0.0168895	-0.17822	7725	-0.168335	0.359285	1.06303	304	13	0.0427632	0.58	4566	89	0.0194919	-0.0821236	4972	-0.0191003	0.718643	1.02227
003_H05	SPAC8C9.17C	spc34	6352	93	0.0146411	-0.29008	8102	188	0.0232041	0.280035	14735	0.0381243	0.890172	1.02169	731	31	0.0424077	0.567956	8224	163	0.01982	-0.0580383	9149	0.0296155	0.978865	1.00373
003_H06	SPAC29E6.10C	SPAC29E6.10C	2913	39	0.0133883	-0.419131	8820	144	0.0163265	-0.22713	11916	-0.279705	0.2094	0.999165	527	9	0.0170778	-0.744247	6043	80	0.0132385	-0.640263	6659	-0.647764	0.0580821	0.687378
003_H07	SPBC1709.05	sks2	2242	38	0.0169492	-0.0788862	15718	295	0.0187683	-0.0260505	18293	-0.0302422	0.953757	1.01216	366	15	0.0409836	0.518678	9869	149	0.0150978	-0.450662	10399	-0.405491	0.266481	1.00706
003_H08	SPAC3H1.12C	snt2	3775	94	0.0249007	0.476085	20527	580	0.0282555	0.564182	24976	0.550697	0.00482847	0.177081	487	6	0.0123203	-1.21533	12017	264	0.0219689	0.0904631	12774	0.0248939	0.867207	1.01147
003_H11	SPAC17H9.06C	SPAC17H9.06C	10	2	0.2	3.48183	31	0	0	--	43	--	--	0.158655	16	0	0	--	65	10	0.153846	2.89842	91	--	--	0.158655
003_H12	SPBC1105.05	exg1	208	2	0.00961538	-0.896683	40	0	0	--	250	--	--	0.158655	39	0	0	--	45	1	0.0222222	0.107005	85	--	--	0.158655
003_H13	SPAC821.03C	slf1	13258	204	0.0153869	-0.218393	11115	199	0.0179037	-0.0940874	24776	-0.195481	0.482266	1.05703	3048	73	0.0239501	-0.256335	7753	119	0.0153489	-0.426863	10993	-0.255734	0.497797	1.03986
003_H14	SPBC16A3.06	SPBC16A3.06	1484	16	0.0107817	-0.731519	10185	188	0.0184585	-0.0500612	11873	-0.115089	0.556994	1.05957	366	5	0.0136612	-1.06628	4198	77	0.0183421	-0.169842	4646	-0.240351	0.344868	1.00059
003_H15	SPBC3D6.13C	pdi3	1417	35	0.0247001	0.464416	9503	165	0.0173629	-0.138337	11120	-0.0479499	0.733818	1.05298	472	11	0.0233051	-0.295724	6986	127	0.0181792	-0.182708	7596	-0.197868	0.506971	1.03431
003_H16	SPBC27.08C	sua1	3470	76	0.021902	0.290964	21052	375	0.017813	-0.101415	24973	-0.0419262	0.98112	1.00306	426	14	0.0328638	0.200133	7340	133	0.0181199	-0.187424	7913	-0.165103	0.575332	1.0385
003_H17	SPCC1902.01	gaf1	3048	93	0.0305118	0.769268	23095	451	0.019528	0.031199	26687	0.136205	0.366931	1.06077	542	14	0.0258303	-0.147307	11123	219	0.0196889	-0.0676131	11898	-0.0875322	0.858127	1.01403
003_H18	SPBC428.10	SPBC428.10	1471	33	0.0224337	0.325569	14358	282	0.0196406	0.0394925	16144	0.0718047	0.742376	1.04904	381	7	0.0183727	-0.638805	9363	191	0.0203994	-0.0164682	9942	-0.0627614	0.850664	1.01705
003_H20	SPBPB10D8.01	SPBPB10D8.01	1699	33	0.0194232	0.117681	22432	346	0.0154244	-0.309134	24510	-0.269667	0.291747	1.0339	596	16	0.0268456	-0.091681	14383	223	0.0155044	-0.412319	15218	-0.411607	0.318668	1.01638
003_H21	SPAC11E3.14	SPAC11E3.14	1359	28	0.0206034	0.202782	40842	750	0.0183634	-0.0575108	42979	-0.038484	0.802456	1.03304	872	23	0.0263761	-0.117135	39685	680	0.0171349	-0.268057	41260	-0.292102	0.721042	1.02107
003_H22	SPCC338.16	pof3	859	20	0.0232829	0.379171	4974	133	0.026739	0.4846	5986	0.470245	0.202392	1.00054	445	18	0.0404494	0.499751	4394	114	0.0259445	0.330429	4971	0.362081	0.54194	1.04026
003_H23	SPAC1783.05	hrp1	593	12	0.0202361	0.176831	11273	229	0.020314	0.0881283	12107	0.101222	0.763103	1.04327	266	10	0.037594	0.394133	6204	137	0.0220825	0.0979072	6617	0.0983027	0.95032	1.0039
003_H24	SPCC970.02	SPCC970.02	1519	38	0.0250165	0.482778	7058	168	0.0238028	0.316782	8783	0.343122	0.287031	1.04057	458	22	0.0480349	0.747715	6845	201	0.0293645	0.509075	7526	0.524807	0.209008	0.983494
003_I01	SPCC1840.12	opt3	2330	40	0.0171674	-0.0604293	9131	155	0.0169751	-0.170924	11656	-0.154236	0.452124	1.06259	645	22	0.0341085	0.253764	9353	269	0.0287608	0.479107	10289	0.455632	0.211002	0.988442
003_I02	SPAC4D7.03	pop2	738	15	0.0203252	0.18317	4688	94	0.0200512	0.0693403	5535	0.0853902	0.914828	1.01455	273	11	0.040293	0.494162	3474	86	0.0247553	0.262741	3844	0.286573	0.761578	1.02149
003_I03	SPCC338.11C	rrg1	1112	22	0.0197842	0.144247	10009	206	0.0205815	0.106999	11349	0.11477	0.747038	1.04718	579	21	0.0362694	0.342385	8178	228	0.0278797	0.434216	9006	0.421961	0.27884	1.02786
003_I04	SPBC409.19C	SPBC409.19C	2454	53	0.0215974	0.270758	12237	241	0.0196944	0.0434354	14985	0.0799065	0.745675	1.04807	1118	46	0.0411449	0.524345	10668	222	0.0208099	0.0122719	12054	0.099483	0.727415	1.02091
003_I05	SPCC613.01	SPCC613.01	3362	51	0.0151695	-0.238922	22178	420	0.0189377	-0.0130878	26011	-0.0380085	0.952607	1.01265	863	33	0.0382387	0.418665	22858	401	0.0175431	-0.234095	24155	-0.214146	0.791496	1.01658
003_I06	SPAC4G8.05	ppk14	1779	23	0.0129286	-0.469532	13485	212	0.0157212	-0.281639	15499	-0.298449	0.200148	0.998841	426	16	0.0375587	0.392778	8595	168	0.0195462	-0.0781064	9205	-0.0573293	0.836057	1.01893
003_I07	SPCC74.04	SPCC74.04	5292	82	0.0154951	-0.208289	31482	509	0.016168	-0.241209	37365	-0.236505	0.420947	1.06213	769	20	0.0260078	-0.137424	27305	415	0.0151987	-0.441052	28509	-0.453895	0.351725	1.00111
003_I08	SPBC1709.14	SPBC1709.14	1300	23	0.0176923	-0.0169771	8207	210	0.0255879	0.421115	9740	0.372291	0.212013	0.996555	472	12	0.0254237	-0.170193	6228	140	0.0224791	0.123588	6852	0.0961625	0.942236	1.00378
003_I09	SPCP1E11.10	SPCP1E11.10	1160	26	0.0224138	0.324287	3620	79	0.0218232	0.191515	4885	0.21433	0.776321	1.03927	750	22	0.0293333	0.0361723	2133	90	0.0421941	1.03204	2995	0.87218	0.107134	0.843148
003_I10	SPBC1709.09	rrf1	5163	106	0.0205307	0.197683	11402	276	0.0242063	0.341034	16947	0.284457	0.199409	0.999897	808	17	0.0210396	-0.443261	6881	143	0.0207819	0.0103269	7849	-0.0284718	0.842901	1.01743
003_I11	SPCC24B10.08C	ada2	1313	27	0.0205636	0.199993	18189	320	0.0175931	-0.119342	19849	-0.0896634	0.771888	1.03907	406	21	0.0517241	0.854469	15292	335	0.0219069	0.0863859	16054	0.0956207	0.63567	1.0163
003_I12	SPAC20H4.09	SPAC20H4.09	823	14	0.0170109	-0.0736369	14752	323	0.0218953	0.196276	15912	0.192539	0.399853	1.06156	477	11	0.0230608	-0.310926	11620	434	0.0373494	0.856087	12542	0.79348	0.0208356	0.475294
003_I13	SPAC17H9.04C	SPAC17H9.04C	5644	66	0.0116938	-0.614351	10443	141	0.0135019	-0.501189	16294	-0.557242	0.0167223	0.387811	525	17	0.032381	0.178777	7868	151	0.0191917	-0.104518	8561	-0.0844731	0.755441	1.01847
003_I14	SPAC30.04C	abc4	1804	30	0.0166297	-0.106336	6318	87	0.0137702	-0.4728	8239	-0.394375	0.0797927	0.758031	652	26	0.0398773	0.479199	4694	74	0.0157648	-0.388291	5446	-0.182208	0.456622	1.04694
003_I15	SPAC17G6.15C	SPAC17G6.15C	4122	82	0.0198933	0.15218	12966	212	0.0163505	-0.225017	17382	-0.138144	0.579418	1.06683	650	8	0.0123077	-1.21681	10032	161	0.0160486	-0.362547	10851	-0.423834	0.251303	0.997605
003_I16	SPAC7D4.12C	SPAC7D4.12C	7764	120	0.015456	-0.211937	25805	368	0.0142608	-0.422293	34057	-0.381225	0.122066	0.874988	1030	20	0.0194175	-0.559013	10970	139	0.0126709	-0.703477	12159	-0.679683	0.0683542	0.71488
003_I17	SPBC13G1.02	mpg2	2146	42	0.0195713	0.12864	21791	445	0.0204213	0.0957251	24424	0.103702	0.485162	1.05531	871	15	0.0172216	-0.732151	9859	185	0.0187646	-0.136986	10930	-0.187326	0.623333	1.02201
003_I18	SPAC343.18	rfp2	1328	8	0.0060241	-1.57128	15929	260	0.0163224	-0.227492	17525	-0.285926	0.229602	1.00999	752	19	0.025266	-0.179174	8023	159	0.019818	-0.058185	8953	-0.0652696	0.809962	1.02154
003_I19	SPCC1906.02C	cue3	3341	49	0.0146663	-0.287598	39649	661	0.0166713	-0.196982	43700	-0.197159	0.56653	1.06233	580	14	0.0241379	-0.245067	24197	375	0.0154978	-0.412936	25166	-0.434907	0.364214	1.00839
003_I20	SPBC26H8.09C	snf59	2099	36	0.017151	-0.0618046	22690	426	0.0187748	-0.025551	25251	-0.0227842	0.905437	1.01556	770	22	0.0285714	-0.00179551	11938	201	0.016837	-0.293364	12931	-0.274369	0.504402	1.03579
003_I21	SPAC23C11.14	zhf1	1217	22	0.0180772	0.014075	4454	92	0.0206556	0.112184	5785	0.0863817	0.930332	1.01391	947	17	0.0179514	-0.67227	3019	71	0.0235177	0.18875	4054	0.064143	0.820231	1.01898
003_I22	SPAC17A2.14	SPAC17A2.14	26	0	0	--	4666	87	0.0186455	-0.0355187	4779	-0.0301646	0.586273	1.06393	433	20	0.0461894	0.691192	3675	116	0.0315646	0.613311	4244	0.641423	0.217426	0.983417
003_I23	SPAC1527.01	mok11	1220	23	0.0188525	0.0746533	13416	253	0.0188581	-0.019165	14912	-0.00583007	0.96556	1.00607	601	23	0.0382696	0.419828	9724	215	0.0221102	0.0997168	10563	0.119144	0.734469	1.0217
003_I24	SPAC12G12.07C	SPAC12G12.07C	4600	92	0.02	0.159901	12372	269	0.0217426	0.18618	17333	0.167865	0.430874	1.06754	1201	52	0.0432973	0.597907	13019	254	0.0195099	-0.0807882	14526	0.0199344	0.832149	1.01851
003_J01	SPAC2F3.16	SPAC2F3.16	770	23	0.0298701	0.738604	1238	34	0.0274637	0.523176	2065	0.584226	0.291023	1.03482	415	17	0.0409639	0.517983	925	32	0.0345946	0.745549	1389	0.784873	0.278754	1.02874
003_J02	SPAC1A6.01C	SPAC1A6.01C	2747	52	0.0189297	0.0805553	6019	115	0.0191062	-0.000309699	8933	0.0088805	0.838967	1.02961	466	7	0.0150215	-0.929344	5505	110	0.0199818	-0.046309	6088	-0.115212	0.595766	1.03732
003_J03	SPAC637.06	gmh5	3624	53	0.0146247	-0.29169	11770	236	0.020051	0.0693247	15683	-0.0122757	0.961669	1.00734	762	19	0.0249344	-0.198232	10790	225	0.0208526	0.0152321	11796	-0.00693731	0.966582	1.00356
003_J04	SPAC24C9.05C	mug70	3507	48	0.0136869	-0.387302	15442	340	0.0220179	0.204327	19337	0.112958	0.542659	1.0611	589	14	0.0237691	-0.267281	12033	295	0.0245159	0.248721	12931	0.20599	0.495628	1.03877
003_J05	SPAC6F12.09	rdp1	2559	48	0.0187573	0.0673549	34870	669	0.0191855	0.00567201	38146	0.0168396	0.62331	1.06037	538	15	0.027881	-0.0370843	19549	377	0.0192849	-0.0975283	20479	-0.121084	0.960222	1.00358
003_J06	SPAC30.01C	sec72	3408	45	0.0132042	-0.4391	12709	186	0.0146353	-0.384896	16348	-0.401667	0.0857738	0.793344	428	6	0.0140187	-1.02902	8014	129	0.0160968	-0.358221	8577	-0.408373	0.236243	0.988954
003_J07	SPBC56F2.03	SPBC56F2.03	3510	74	0.0210826	0.235955	21747	392	0.0180255	-0.0843106	25723	-0.0373303	0.953801	1.01187	866	27	0.0311778	0.124152	13190	286	0.0216831	0.0715725	14369	0.0693007	0.728584	1.02119
003_J08	SPAC4H3.03C	SPAC4H3.03C	3819	65	0.0170202	-0.0728546	11721	220	0.0187697	-0.02594	15825	-0.0460016	0.849846	1.02737	632	13	0.0205696	-0.475854	10330	142	0.0137464	-0.585947	11117	-0.585919	0.112377	0.856571
003_J09	SPAC6F12.10C	ade3	4670	79	0.0169165	-0.0816693	22646	419	0.0185022	-0.0466538	27814	-0.0545775	0.993763	1.00074	1120	20	0.0178571	-0.679867	19742	408	0.0206666	0.00230294	21290	-0.0489425	0.859771	1.01218
003_J10	SPAC926.06C	SPAC926.06C	5741	89	0.0155025	-0.207596	18996	258	0.0135818	-0.492672	25084	-0.432712	0.0689483	0.727301	947	14	0.0147835	-0.952378	12200	187	0.0153279	-0.428841	13348	-0.473214	0.22415	0.992438
003_J11	SPAC20G8.02	SPAC20G8.02	2416	36	0.0149007	-0.264723	6292	101	0.0160521	-0.251583	8845	-0.267214	0.207114	1.0019	389	6	0.0154242	-0.891176	2702	39	0.0144338	-0.515552	3136	-0.543824	0.0744675	0.728024
003_J12	SPBC1198.06C	SPBC1198.06C	2287	44	0.0192392	0.103948	36375	607	0.0166873	-0.195599	39313	-0.169236	0.652209	1.05382	407	18	0.044226	0.628528	20080	259	0.0128984	-0.677805	20764	-0.650499	0.110712	0.856321
003_J13	SPAPB1E7.08C	SPAPB1E7.08C	2931	53	0.0180826	0.0145	7860	167	0.0212468	0.152899	11011	0.106698	0.783678	1.03897	621	10	0.0161031	-0.829034	3498	84	0.0240137	0.218861	4213	0.104691	0.911121	1.01136
003_J14	SPBC16E9.11C	pub3	2046	33	0.016129	-0.150439	26440	443	0.0167549	-0.189763	28962	-0.180268	0.558111	1.05977	524	8	0.0152672	-0.905935	22891	490	0.0214058	0.0530032	23913	0.00303689	0.707198	1.02451
003_J15	SPBC646.17C	dic1	2485	38	0.0152918	-0.227346	28432	506	0.0177968	-0.102726	31461	-0.105771	0.844721	1.02867	691	15	0.0217077	-0.398164	18238	377	0.0206711	0.00261893	19321	-0.0354204	0.859608	1.01236
003_J16	SPBC2D10.04	SPBC2D10.04	4409	76	0.0172375	-0.0545514	22344	378	0.0169173	-0.175849	27207	-0.157985	0.619391	1.05769	536	4	0.00746269	-1.9386	12384	190	0.0153424	-0.427476	13114	-0.499225	0.195489	0.983065
003_J17	SPCC285.16C	msh6	1857	25	0.0134626	-0.411145	14870	256	0.0172159	-0.150609	17008	-0.172586	0.476299	1.05718	420	13	0.0309524	0.113682	6144	124	0.0201823	-0.0319081	6701	-0.0241471	0.799539	1.02025
003_J18	SPBC4F6.06	kin1	1984	32	0.016129	-0.150439	12485	257	0.0205847	0.107225	14758	0.0771273	0.76073	1.04547	515	10	0.0194175	-0.559013	5557	116	0.0208746	0.0167486	6198	-0.0324958	0.758097	1.0203
003_J19	SPAC1002.03C	gls2	3506	72	0.0205362	0.198072	27071	545	0.0201322	0.0751602	31194	0.0918466	0.439496	1.06793	919	15	0.0163221	-0.809543	15752	339	0.0215211	0.0607522	17025	0.000732901	0.819839	1.01929
003_J21	SPAC12B10.16C	mug157	3446	55	0.0159605	-0.16559	12529	210	0.0167611	-0.18923	16240	-0.190801	0.420496	1.06355	990	34	0.0343434	0.263666	9003	186	0.0206598	0.00182683	10213	0.052838	0.888033	1.01287
003_J22	SPCC584.03C	SPCC584.03C	4192	67	0.0159828	-0.163577	38055	693	0.0182105	-0.0695785	43007	-0.0738265	0.947142	1.01367	736	19	0.0258152	-0.148147	25231	425	0.0168444	-0.292733	26411	-0.311795	0.598455	1.03513
003_J23	SPAC1786.02	SPAC1786.02	1692	30	0.0177305	-0.0138664	27596	541	0.0196043	0.0368216	29859	0.0422041	0.611417	1.06307	413	17	0.0411622	0.524952	20629	382	0.0185176	-0.156099	21441	-0.162559	0.877488	1.01073
003_J24	SPCP1E11.05C	are2	842	23	0.0273159	0.609642	3487	104	0.0298251	0.642177	4456	0.631746	0.104333	0.845928	436	16	0.0366972	0.359303	2151	71	0.0330079	0.677813	2674	0.66406	0.289721	1.03289
003_K01	SPCC1919.03C	amk2	24	0	0	--	7165	154	0.0214934	0.169544	7343	0.17809	0.73109	1.05242	499	25	0.0501002	0.808448	8718	254	0.0291351	0.497761	9496	0.51222	0.174194	0.958675
003_K02	SPAC6F6.03C	SPAC6F6.03C	1048	14	0.0133588	-0.422311	4870	144	0.0295688	0.629727	6076	0.495766	0.169218	0.968625	393	4	0.0101781	-1.4909	4399	89	0.0202319	-0.0283683	4885	-0.129073	0.518067	1.03548
003_K03	SPCC417.06C	mug27	17	0	0	--	10299	183	0.0177687	-0.105008	10499	-0.094017	0.586254	1.0645	662	27	0.0407855	0.511688	6741	137	0.0203234	-0.0218567	7567	0.0618381	0.978799	1.00399
003_K04	SPBC713.03	SPBC713.03	782	19	0.0242967	0.44066	4431	88	0.0198601	0.0555234	5320	0.116448	0.988428	1.00048	270	3	0.0111111	-1.36437	3979	59	0.0148278	-0.476689	4311	-0.540531	0.0856111	0.767817
003_K05	SPCC613.02	SPCC613.02	4010	42	0.0104738	-0.773312	25404	441	0.0173595	-0.138625	29897	-0.205457	0.484149	1.05822	766	26	0.0339426	0.246727	19944	403	0.0202066	-0.030173	21139	-0.0350257	0.830036	1.01949
003_K06	SPAC2F3.15	lsk1	2139	31	0.0144928	-0.304768	9709	163	0.0167885	-0.18687	12042	-0.209564	0.33334	1.04716	527	15	0.028463	-0.00728105	5831	105	0.0180072	-0.196424	6478	-0.169286	0.516822	1.03694
003_K07	SPCC74.06	mak3	25	0	0	--	2568	61	0.0237539	0.313816	2654	0.31321	0.712767	1.05001	1302	45	0.0345622	0.272827	1782	51	0.0286195	0.472002	3180	0.552556	0.384028	1.01165
003_K08	SPBC14F5.10C	SPBC14F5.10C	735	12	0.0163265	-0.132881	3310	93	0.0280967	0.556052	4150	0.455201	0.316431	1.04615	277	8	0.0288809	0.0137453	2037	53	0.0260187	0.334548	2375	0.312745	0.852396	1.01565
003_K10	SPCC550.14	vgl1	2178	44	0.020202	0.1744	6440	130	0.0201863	0.0790312	8792	0.0926853	0.912305	1.01353	486	17	0.0349794	0.290138	5221	94	0.0180042	-0.196663	5818	-0.125921	0.565024	1.03714
003_K11	SPCC777.07	omh3	18	0	0	--	21036	354	0.0168283	-0.183459	21408	-0.171322	0.525892	1.06257	467	14	0.0299786	0.0675637	12024	210	0.0174651	-0.240526	12715	-0.243066	0.557722	1.03521
003_K12	SPBC16D10.08C	hsp104	1729	35	0.0202429	0.177318	3570	55	0.0154062	-0.31084	5389	-0.156772	0.342676	1.05136	453	16	0.0353201	0.30412	1953	36	0.0184332	-0.162693	2458	0.0261992	0.634741	1.0174
003_K13	SPAC1527.03	SPAC1527.03	1461	19	0.0130048	-0.461056	13272	233	0.0175558	-0.122404	14985	-0.146605	0.521648	1.0601	379	17	0.0448549	0.648896	9800	203	0.0207143	0.00562801	10399	0.0262319	0.939366	1.00514
003_K14	SPAC869.04	SPAC869.04	890	14	0.0157303	-0.18655	17069	279	0.0163454	-0.225461	18252	-0.214783	0.380348	1.05414	352	12	0.0340909	0.253018	16906	335	0.0198155	-0.0583723	17605	-0.0780054	0.988079	1.0008
003_K15	SPBC21D10.11C	nfs1	7821	130	0.0166219	-0.107013	1172	18	0.0153584	-0.315324	9141	-0.202254	0.314436	1.04723	939	17	0.0181044	-0.660031	706	29	0.0410765	0.993315	1691	0.39787	0.778048	1.02054
003_K16	SPBC1105.10	rav1	1065	22	0.0206573	0.206551	6618	112	0.0169235	-0.175316	7817	-0.118486	0.466303	1.05503	701	21	0.0299572	0.0665343	4868	119	0.0244454	0.244562	5709	0.244261	0.70822	1.02363
003_K17	SPBC23E6.02	rrp2	1349	22	0.0163084	-0.134486	7529	129	0.0171337	-0.157507	9029	-0.154735	0.408508	1.06659	566	28	0.04947	0.790184	4998	98	0.0196078	-0.0735672	5690	0.0935536	0.986705	1.00198
003_K18	SPAC343.11C	msc1	1113	19	0.017071	-0.0685535	6406	156	0.0243522	0.349702	7694	0.297765	0.417543	1.0629	432	10	0.0231481	-0.305472	3853	83	0.0215417	0.0621311	4378	0.0322597	0.780712	1.01894
003_K19	SPBC15D4.01C	klp9	2010	42	0.0208955	0.223094	37421	644	0.0172096	-0.151135	40117	-0.122099	0.8388	1.02981	573	15	0.026178	-0.128013	18864	225	0.0119275	-0.790709	19677	-0.781447	0.0465278	0.645241
003_K20	SPBP35G2.14	SPBP35G2.14	3205	70	0.0218409	0.286931	12379	219	0.0176913	-0.111312	15873	-0.0299731	0.905322	1.01615	669	15	0.0224215	-0.351484	7654	119	0.0155474	-0.408322	8457	-0.398618	0.244893	0.994739
003_K21	SPBC1105.08	SPBC1105.08	1264	19	0.0150316	-0.252096	15501	315	0.0203213	0.0886427	17099	0.0734186	0.714347	1.05037	313	14	0.0447284	0.644824	7957	175	0.0219932	0.0920604	8459	0.106751	0.842588	1.01744
003_K22	SPBP4H10.04	ppb1	890	22	0.0247191	0.465527	2729	51	0.0186882	-0.032223	3692	0.0913283	0.830714	1.0295	280	12	0.0428571	0.583167	1382	43	0.0311143	0.592581	1717	0.640835	0.405614	1.02808
003_K23	SPAC1565.07C	knd1	1856	32	0.0172414	-0.0542242	20717	367	0.0177149	-0.109383	22972	-0.0991864	0.781361	1.04027	624	26	0.0416667	0.542525	14668	260	0.0177257	-0.219159	15578	-0.182438	0.737914	1.02198
003_K24	SPCC794.11C	ent3	867	23	0.0265283	0.567431	11124	227	0.0204063	0.0946688	12241	0.138999	0.644398	1.05362	347	14	0.0403458	0.496051	8913	162	0.0181757	-0.182987	9436	-0.159184	0.635788	1.01597
003_L01	SPAC4C5.01	SPAC4C5.01	2577	46	0.0178502	-0.00415805	10182	191	0.0187586	-0.0267962	12996	-0.0276052	0.845783	1.02758	703	13	0.0184922	-0.629454	6452	167	0.0258834	0.327032	7335	0.245297	0.617456	1.02573
003_L03	SPAC5H10.11	gmh1	4036	57	0.0141229	-0.342064	11028	198	0.0179543	-0.0900186	15319	-0.161585	0.485396	1.05437	484	9	0.018595	-0.621451	7877	152	0.0192967	-0.0966449	8522	-0.140363	0.642599	1.015
003_L04	SPAC24C9.07C	bgs2	2167	34	0.0156899	-0.190264	6749	113	0.0167432	-0.190771	9063	-0.199629	0.318352	1.04701	324	6	0.0185185	-0.6274	4838	82	0.0169492	-0.283785	5250	-0.316102	0.271365	1.0194
003_L06	SPAC32A11.02C	SPAC32A11.02C	2457	35	0.014245	-0.329642	11213	199	0.0177473	-0.106752	13904	-0.145482	0.508896	1.05665	449	9	0.0200445	-0.513159	8436	150	0.0177809	-0.214667	9044	-0.246093	0.467511	1.04675
003_L07	SPBC11G11.03	mrt4	1970	51	0.0258883	0.532202	10706	235	0.0219503	0.199893	12962	0.252939	0.334669	1.04613	391	18	0.0460358	0.686388	8644	179	0.020708	0.00519055	9232	0.0389233	0.955405	1.00354
003_L08	SPAC589.02C	med13	2337	37	0.0158323	-0.177232	7763	140	0.0180343	-0.0836072	10277	-0.111583	0.534799	1.06219	276	6	0.0217391	-0.396074	4857	86	0.0177064	-0.220727	5225	-0.243844	0.359436	1.00757
003_L09	SPBC577.06C	stt4	5360	87	0.0162313	-0.141317	12556	240	0.0191144	0.000309633	18243	-0.0529349	0.873033	1.02553	1239	38	0.0306699	0.100455	7259	177	0.0243835	0.240909	8713	0.253466	0.542495	1.04006
003_L10	SPAC977.17	SPAC977.17	5298	77	0.0145338	-0.300689	14635	231	0.0157841	-0.275878	20241	-0.293206	0.228746	1.00904	482	14	0.0290456	0.0219531	12333	180	0.014595	-0.499525	13009	-0.487453	0.206224	0.979176
003_L11	SPAC23D3.13C	SPAC23D3.13C	5972	75	0.0125586	-0.511423	14319	252	0.017599	-0.118855	20618	-0.232526	0.35541	1.06052	1653	29	0.0175439	-0.705403	9876	184	0.018631	-0.147291	11742	-0.20009	0.618722	1.02621
003_L12	SPBC146.06C	fan1	15884	244	0.0153614	-0.220792	30315	478	0.0157678	-0.277369	46921	-0.27684	0.325948	1.05117	4936	61	0.0123582	-1.2109	17178	260	0.0151356	-0.447049	22435	-0.548063	0.20273	0.974341
003_L13	SPBC1685.05	SPBC1685.05	1330	30	0.0225564	0.333437	23612	378	0.0160088	-0.255482	25350	-0.210985	0.441602	1.06729	698	18	0.025788	-0.149671	16155	363	0.0224698	0.122991	17234	0.0911098	0.621611	1.02345
003_L14	SPBC1706.01	tea4	2083	35	0.0168027	-0.0914073	5687	90	0.0158256	-0.272091	7895	-0.235035	0.245911	1.02458	543	26	0.0478821	0.743119	4539	76	0.0167438	-0.301373	5184	-0.0805749	0.616032	1.02824
003_L16	SPBC2G2.14	csi1	1368	34	0.0248538	0.473367	5304	119	0.0224359	0.231461	6825	0.276363	0.507026	1.05485	443	17	0.0383747	0.423787	3235	77	0.0238022	0.206095	3772	0.268063	0.802737	1.0206
003_L18	SPBC530.06C	clu1	1786	31	0.0173572	-0.0445632	15971	288	0.0180327	-0.0837337	18076	-0.0758085	0.791089	1.03746	372	11	0.0295699	0.0477603	11891	194	0.0163149	-0.338811	12468	-0.344364	0.380291	1.01282
003_L19	SPAC1002.05C	jmj2	2188	33	0.0150823	-0.247246	20210	417	0.0206333	0.11063	22848	0.0855781	0.564065	1.06149	452	12	0.0265487	-0.107729	9278	222	0.0239276	0.213676	9964	0.180321	0.632384	1.01933
003_L20	SPCC1223.03C	gut2	3308	57	0.017231	-0.0550967	11198	187	0.0166994	-0.194551	14750	-0.170746	0.454137	1.06021	774	6	0.00775194	-1.88374	5994	121	0.0201869	-0.031582	6895	-0.177649	0.517775	1.03753
003_L21	SPAC13G6.01C	rad8	1715	35	0.0204082	0.189047	7649	143	0.0186953	-0.0316757	9542	0.00570339	0.850108	1.0273	464	8	0.0172414	-0.730493	3754	89	0.023708	0.200379	4315	0.11575	0.940524	1.00365
003_L22	SPCC622.16C	epe1	1294	15	0.011592	-0.626974	7195	153	0.0212648	0.154117	8657	0.0638177	0.994624	1.00033	323	13	0.0402477	0.492537	3322	95	0.0285972	0.470877	3753	0.481365	0.439107	1.05199
003_L23	SPAC17H9.01	cid16	1838	51	0.0277476	0.632261	10353	230	0.0222158	0.217237	12472	0.283777	0.286421	1.04075	624	16	0.025641	-0.157915	5228	121	0.0231446	0.165678	5989	0.141498	0.896459	1.0144
003_L24	SPCP1E11.06	apl4	1806	46	0.0254707	0.508737	19198	376	0.0195854	0.0354288	21426	0.0856019	0.587833	1.06431	489	17	0.0347648	0.28126	15184	361	0.023775	0.204449	16051	0.184429	0.466583	1.04541
003_M01	SPCC1919.11	mug137	3002	80	0.0266489	0.573977	5821	153	0.0262841	0.459845	9056	0.480012	0.107303	0.852478	755	31	0.0410596	0.521351	6001	154	0.0256624	0.314657	6941	0.367608	0.426805	1.04316
003_M02	SPAC1B3.04C	SPAC1B3.04C	451	9	0.0199557	0.156698	797	17	0.02133	0.158535	1274	0.137917	0.813738	1.03156	309	6	0.0194175	-0.559013	490	10	0.0204082	-0.0158517	815	--	--	0.158655
003_M03	SPCC417.09C	SPCC417.09C	1907	33	0.0173047	-0.0489382	10391	199	0.0191512	0.00308609	12530	-0.00527592	0.906031	1.0155	378	26	0.0687831	1.26568	9152	192	0.020979	0.0239493	9748	0.108104	0.787119	1.01927
003_M04	SPBP35G2.11C	SPBP35G2.11C	865	18	0.0208092	0.217125	8520	159	0.018662	-0.0342464	9562	-0.0056563	0.816359	1.0324	301	16	0.0531561	0.893868	5184	90	0.0173611	-0.249139	5591	-0.135175	0.539234	1.04014
003_M05	SPCC63.04	mok14	7204	134	0.0186008	0.0552635	26232	448	0.0170784	-0.162177	34018	-0.12136	0.804241	1.03197	2686	72	0.0268057	-0.0938311	16933	303	0.0178941	-0.205518	19994	-0.151037	0.883469	1.0117
003_M06	SPAC16E8.09	scd1	616	6	0.00974026	-0.878067	10299	235	0.0228177	0.255809	11156	0.221744	0.457783	1.06087	249	5	0.0200803	-0.510586	9706	183	0.0188543	-0.130103	10143	-0.168436	0.638747	1.01452
003_M07	SPCC757.04	SPCC757.04	6834	127	0.0185836	0.053927	23413	376	0.0160595	-0.250925	30750	-0.187211	0.546479	1.06133	1260	17	0.0134921	-1.08426	18570	343	0.0184707	-0.159763	20190	-0.225364	0.718824	1.02207
003_M08	SPAC2F7.08C	snf5	2463	31	0.0125863	-0.508248	16999	303	0.0178246	-0.10048	19796	-0.141789	0.598998	1.06197	593	10	0.0168634	-0.762473	5580	110	0.0197133	-0.0658316	6293	-0.126685	0.583851	1.03781
003_M09	SPBC31F10.14C	hip3	1805	33	0.0182825	0.0303678	7237	157	0.0216941	0.182953	9232	0.150309	0.722621	1.0537	590	15	0.0254237	-0.170193	6748	129	0.0191168	-0.110159	7482	-0.113066	0.657213	1.02472
003_M10	SPAC6G9.14	SPAC6G9.14	1135	16	0.0140969	-0.34472	7641	121	0.0158356	-0.271174	8913	-0.278437	0.192528	0.992211	533	25	0.0469043	0.713352	3205	98	0.0305772	0.567459	3861	0.632644	0.245472	0.994524
003_M11	SPBC2G2.15C	mrm2	4006	66	0.0164753	-0.119796	9161	159	0.0173562	-0.138898	13392	-0.147979	0.49455	1.05535	634	26	0.0410095	0.519588	6143	168	0.0273482	0.406448	6971	0.431662	0.334007	1.01492
003_M12	SPAC29E6.01	pof11	1624	21	0.012931	-0.469262	15701	289	0.0184065	-0.0541348	17635	-0.0815642	0.764096	1.04418	628	13	0.0207006	-0.466694	11376	214	0.0188115	-0.133381	12231	-0.166499	0.698421	1.02548
003_M13	SPAC3G6.04	rnp24	4840	67	0.013843	-0.370945	10006	169	0.0168899	-0.17819	15082	-0.252264	0.27594	1.03609	903	29	0.0321152	0.166886	7309	139	0.0190176	-0.117659	8380	-0.0530201	0.813559	1.01954
003_M14	SPAC56E4.03	SPAC56E4.03	1993	19	0.00953337	-0.909042	8842	134	0.0151549	-0.334559	10988	-0.423145	0.0651562	0.718541	386	9	0.0233161	-0.295045	6374	93	0.0145905	-0.499966	6862	-0.492202	0.13949	0.911027
003_M15	SPBC36B7.03	sec63	1694	26	0.0153483	-0.222022	12684	221	0.0174235	-0.133311	14625	-0.140329	0.533819	1.06426	394	10	0.0253807	-0.172636	8154	157	0.0192544	-0.0998134	8715	-0.119487	0.690233	1.02687
003_M16	SPBC146.04	SPBC146.04	6743	106	0.01572	-0.187498	10301	151	0.0146588	-0.382584	17301	-0.328473	0.164295	0.964967	909	11	0.0121012	-1.24122	9553	115	0.0120381	-0.77739	10588	-0.817411	0.0251031	0.5165
003_M17	SPBC1734.06	rhp18	853	16	0.0187573	0.0673549	5990	116	0.0193656	0.0191491	6975	0.0268601	0.81763	1.03111	461	14	0.0303688	0.0862195	4182	69	0.0164993	-0.322595	4726	-0.247622	0.338194	1.00722
003_M18	SPAC25B8.11	SPAC25B8.11	1249	29	0.0232186	0.37518	11438	203	0.0177479	-0.106703	12919	-0.0502032	0.771512	1.03989	522	15	0.0287356	0.0064721	5065	112	0.0221125	0.0998665	5714	0.099007	0.999399	0.999399
003_M19	SPBC3B8.06	SPBC3B8.06	3131	54	0.0172469	-0.0537635	27696	463	0.0167172	-0.193013	31344	-0.175007	0.59065	1.06209	505	14	0.0277228	-0.0452972	17215	288	0.0167296	-0.302595	18022	-0.316506	0.505707	1.03509
003_M20	SPAC343.07	mug28	1587	29	0.0182735	0.0296514	10348	252	0.0243525	0.349724	12216	0.314395	0.239179	1.01804	693	14	0.020202	-0.501869	8060	164	0.0203474	-0.020154	8931	-0.061648	0.816752	1.01706
003_M21	SPAC922.03	SPAC922.03	1469	25	0.0170184	-0.0730057	13012	344	0.0264371	0.468218	14850	0.428483	0.0715267	0.730082	552	20	0.0362319	0.340891	9662	188	0.0194577	-0.0846592	10422	-0.0596402	0.873573	1.01103
003_M22	SPAC9G1.03C	rpl3001	969	25	0.0257998	0.52726	9345	268	0.0286784	0.585619	10607	0.58532	0.0312085	0.543821	486	11	0.0226337	-0.337893	5642	207	0.0366891	0.830354	6346	0.745164	0.0828419	0.7581
003_M23	SPBC32H8.13C	mok12	753	17	0.0225764	0.334714	23991	446	0.0185903	-0.0397974	25207	-0.0170436	0.884594	1.02536	358	15	0.0418994	0.550562	23120	586	0.025346	0.296761	24079	0.27038	0.241708	0.993338
003_M24	SPAC1071.06	arp9	1889	48	0.0254103	0.505312	7002	146	0.0208512	0.125782	9085	0.204662	0.578603	1.06595	732	39	0.0532787	0.89719	5850	156	0.0266667	0.370039	6777	0.4812	0.279689	1.02978
003_N01	SPAC4F8.10C	stg1	680	23	0.0338235	0.917928	7181	121	0.01685	-0.181597	8005	-0.047693	0.647483	1.05212	418	21	0.0502392	0.812446	4636	106	0.0228645	0.148114	5181	0.243655	0.743397	1.02193
003_N02	SPAC1A6.05C	ptl3	717	17	0.0237099	0.40539	6347	120	0.0189066	-0.0154602	7201	0.0346416	0.848988	1.02791	169	8	0.0473373	0.726608	4641	104	0.022409	0.119078	4922	0.133714	0.980508	1.00313
003_N03	SPBC4.05	mlo2	2846	71	0.0249473	0.478784	19967	465	0.0232884	0.285265	23349	0.3114	0.101068	0.832292	429	9	0.020979	-0.447421	21910	572	0.0261068	0.339428	22920	0.293298	0.224022	0.993269
003_N04	SPAC24H6.03	cul3	5984	95	0.0158757	-0.173282	15967	278	0.0174109	-0.134356	22324	-0.156088	0.581718	1.06671	477	7	0.0146751	-0.963003	11807	194	0.0164309	-0.328584	12485	-0.375261	0.335374	1.01029
003_N05	SPBC18H10.05	SPBC18H10.05	4314	78	0.0180807	0.0143486	8859	176	0.0198668	0.0560118	13427	0.0262675	0.965149	1.00597	534	15	0.0280899	-0.0263178	7730	136	0.0175938	-0.229932	8415	-0.216039	0.50098	1.03619
003_N06	SPAC32A11.03C	phx1	1785	37	0.0207283	0.211502	4332	79	0.0182364	-0.0675284	6233	0.00225161	0.720673	1.05427	276	7	0.0253623	-0.173682	3154	60	0.0190235	-0.117218	3497	-0.119723	0.46579	1.04438
003_N07	SPBP4H10.13	rps2302	2368	43	0.0181588	0.0205682	8630	163	0.0188876	-0.0169083	11204	-0.0155739	0.835827	1.03057	435	27	0.062069	1.1175	8698	166	0.0190848	-0.11257	9326	-0.0062357	0.950348	1.00359
003_N08	SPAC630.13C	tsc2	1411	18	0.0127569	-0.48882	5186	83	0.0160046	-0.255859	6698	-0.306504	0.148317	0.924488	321	8	0.0249221	-0.198942	4585	79	0.0172301	-0.260067	4993	-0.259208	0.331986	1.01663
003_N09	SPAC1093.01	ppr5	941	13	0.0138151	-0.373854	1589	41	0.0258024	0.433157	2584	0.172845	0.957888	1.01009	493	13	0.0263692	-0.117517	1051	48	0.0456708	1.14627	1605	0.896461	0.167748	0.953197
003_N10	SPAC9E9.03	leu2	6225	96	0.0154217	-0.215139	8690	125	0.0143843	-0.409848	15136	-0.353695	0.128082	0.883962	558	19	0.0340502	0.251294	6713	115	0.0171309	-0.268394	7405	-0.203669	0.491031	1.03812
003_N11	SPAC23G3.12C	SPAC23G3.12C	3768	58	0.0153928	-0.217845	5903	113	0.0191428	0.00245469	9842	-0.0987177	0.559095	1.06036	709	16	0.022567	-0.342154	3955	86	0.0217446	0.0756609	4766	0.0432536	0.827249	1.01845
003_N14	SPBC1921.05	ape2	3828	62	0.0161964	-0.144422	11917	188	0.0157758	-0.276636	15995	-0.253943	0.278953	1.03508	1029	26	0.0252672	-0.1791	11268	178	0.0157969	-0.385352	12501	-0.355413	0.364231	1.00756
003_N15	SPCC1450.09C	SPCC1450.09C	2194	26	0.0118505	-0.595151	9561	186	0.019454	0.0257214	11967	-0.0701873	0.687693	1.05753	450	16	0.0355556	0.313706	8613	185	0.0214792	0.0579395	9264	0.0634591	0.901143	1.01278
003_N16	SPBC30D10.10C	tor1	1325	18	0.0135849	-0.398095	4808	92	0.0191348	0.00184913	6243	-0.0781383	0.52075	1.05964	566	14	0.024735	-0.209816	4674	50	0.0106975	-0.947728	5304	-0.797171	0.0198024	0.461763
003_N17	SPCC306.04C	set1	751	18	0.023968	0.421013	3826	109	0.0284893	0.576072	4704	0.551377	0.163371	0.964931	340	6	0.0176471	-0.696941	2509	52	0.0207254	0.00640109	2907	-0.0600785	0.524651	1.03354
003_N18	SPBC691.05C	SPBC691.05C	2007	33	0.0164425	-0.122674	20721	362	0.0174702	-0.129452	23123	-0.123595	0.697658	1.05132	401	7	0.0174564	-0.712616	12604	203	0.016106	-0.3574	13215	-0.394353	0.318793	1.01472
003_N19	SPAC1006.03C	red1	4082	154	0.0377266	1.07548	16986	1081	0.0636406	1.7356	22303	1.63041	1.46568e-14	9.24549e-12	511	10	0.0195695	-0.547764	12541	637	0.0507934	1.29964	13699	1.22382	0.000337976	0.0531973
003_N20	SPCC1322.03	trp1322	2442	54	0.022113	0.304797	37900	687	0.0181266	-0.0762356	41083	-0.0437861	0.835501	1.03057	389	11	0.0282776	-0.0167072	22866	393	0.0171871	-0.263673	23659	-0.288861	0.622341	1.02411
003_N21	SPAC13G7.02C	ssa1	1081	20	0.0185014	0.0475341	1581	38	0.0240354	0.330814	2720	0.202565	0.962172	1.0072	422	16	0.0379147	0.406388	945	24	0.0253968	0.29965	1407	0.463311	0.702171	1.0224
003_N22	SPCC63.02C	aah3	734	13	0.0177112	-0.0154397	3958	89	0.0224861	0.234686	4794	0.199317	0.821283	1.032	465	20	0.0430108	0.588329	3034	65	0.0214239	0.0542206	3584	0.194844	0.96062	1.003
003_N23	SPAC17H9.10C	ddb1	4360	91	0.0208716	0.221439	9179	202	0.0220068	0.203599	13832	0.192802	0.449796	1.06586	927	24	0.02589	-0.143976	9145	282	0.0308365	0.579642	10378	0.517506	0.153895	0.929871
003_N24	SPCP25A2.02C	rhp26	2284	53	0.0232049	0.37433	9122	187	0.0204999	0.101268	11646	0.152264	0.625702	1.05816	552	23	0.0416667	0.542525	8429	255	0.0302527	0.552066	9259	0.544461	0.152262	0.930721
003_O01	SPCC24B10.03	SPCC24B10.03	1676	44	0.026253	0.552382	6682	110	0.0164621	-0.215196	8512	-0.0392763	0.685762	1.05972	1293	63	0.0487239	0.768261	2249	52	0.0231214	0.16423	3657	0.613322	0.277496	1.03014
003_O02	SPBC16H5.04	SPBC16H5.04	2204	54	0.0245009	0.452736	849	17	0.0200236	0.0673504	3124	0.296614	0.708742	1.048	343	22	0.0641399	1.16485	614	14	0.0228013	0.144118	993	--	--	0.158655
003_O07	SPCC895.05	for3	762	19	0.0249344	0.478037	7034	117	0.0166335	-0.200257	7932	-0.118176	0.469463	1.05688	617	13	0.0210697	-0.441199	6782	106	0.0156296	-0.400716	7518	-0.400116	0.227925	0.989667
003_O08	SPAC4G8.08	SPAC4G8.08	1413	31	0.0219391	0.293407	424	9	0.0212264	0.151513	1877	0.201671	0.974152	1.00473	240	9	0.0375	0.390522	220	6	0.0272727	0.402461	475	--	--	0.158655
003_O09	SPCC4G3.09C	gyp3	5716	118	0.0206438	0.20561	5988	113	0.0188711	-0.0181712	11935	0.0599142	0.899724	1.01711	2297	46	0.0200261	-0.514486	5293	102	0.0192707	-0.0985865	7738	-0.12225	0.649372	1.02007
003_O10	SPBC14F5.07	doa10	2085	47	0.022542	0.332514	15726	289	0.0183772	-0.0564301	18147	-0.0052843	0.960902	1.00721	622	22	0.0353698	0.306148	15506	303	0.0195408	-0.0785068	16453	-0.0748036	0.996765	1.00026
003_O12	SPAC139.06	hat1	882	11	0.0124717	-0.521446	611	14	0.0229133	0.261835	1518	-0.177263	0.291278	1.03456	348	18	0.0517241	0.854469	451	13	0.0288248	0.482314	830	--	--	0.158655
003_O13	SPAC25B8.04C	mss51	5183	91	0.0175574	-0.0280202	14781	253	0.0171166	-0.158954	20308	-0.135969	0.623596	1.05914	1427	45	0.0315347	0.140571	11558	231	0.0199862	-0.045997	13261	0.00214644	0.904195	1.0126
003_O14	SPAC17A5.01	pex6	2098	36	0.0171592	-0.0611171	6179	128	0.0207153	0.116351	8441	0.0655389	0.991079	1.00156	536	12	0.0223881	-0.353639	5496	107	0.0194687	-0.0838412	6151	-0.105423	0.616326	1.02656
003_O15	SPAC2F7.06C	pol4	5131	131	0.0255311	0.512156	9521	163	0.0171201	-0.158661	14946	0.0837415	0.734377	1.05235	979	27	0.0275792	-0.05279	6171	156	0.0252795	0.292972	7333	0.270153	0.571873	1.03821
003_O16	SPCP1E11.02	ppk38	2429	43	0.0177028	-0.0161252	10518	178	0.0169234	-0.175331	13168	-0.149548	0.487066	1.05509	739	29	0.0392422	0.456038	7343	121	0.0164783	-0.324433	8232	-0.193498	0.534704	1.0384
003_O17	SPAC22A12.07C	ogm1	1560	17	0.0108974	-0.716111	3740	84	0.0224599	0.233003	5401	0.00931401	0.705947	1.04878	504	15	0.0297619	0.0570982	2243	45	0.0200624	-0.0405027	2807	0.0414298	0.686677	1.02594
003_O18	SPAC16C9.05	cph1	1105	16	0.0144796	-0.306074	4662	205	0.0439725	1.20226	5988	1.01718	0.00138467	0.0661704	364	14	0.0384615	0.427048	3276	128	0.039072	0.921138	3782	0.878205	0.078958	0.739762
003_O19	SPAC16C9.07	pom2	4011	102	0.0254301	0.506436	9898	195	0.0197009	0.0439173	14206	0.173467	0.489738	1.0522	803	23	0.0286426	0.00179328	7313	178	0.0243402	0.238344	8317	0.222679	0.615451	1.03
003_O20	SPAC140.02	gar2	7383	160	0.0216714	0.275693	21182	489	0.0230856	0.272648	29214	0.262993	0.116394	0.867864	632	28	0.0443038	0.631062	12763	216	0.0169239	-0.285934	13639	-0.220489	0.620422	1.02417
003_O21	SPAC27F1.05C	SPAC27F1.05C	3020	71	0.0235099	0.393171	22441	430	0.0191614	0.00385186	25962	0.0555445	0.614913	1.06212	524	16	0.0305344	0.0940645	15445	271	0.0175461	-0.233845	16256	-0.239899	0.629419	1.02135
003_O22	SPBC1703.04	mlh1	3239	64	0.0197592	0.142424	20321	405	0.0199301	0.0606027	24029	0.0722714	0.587931	1.06266	773	19	0.0245796	-0.21891	13557	301	0.0222026	0.105727	14650	0.0733575	0.713198	1.02565
003_P01	SPAC4H3.07C	SPAC4H3.07C	1805	45	0.0249307	0.477827	5836	124	0.0212474	0.15294	7810	0.224213	0.585035	1.06597	1196	45	0.0376254	0.395339	3626	66	0.0182019	-0.180911	4933	0.11718	0.986696	1.0023
003_P02	SPAC1F7.08	fio1	2986	56	0.0187542	0.0671133	5775	117	0.0202597	0.0842678	8934	0.0606276	0.995905	1.00035	2263	42	0.0185594	-0.624216	4049	81	0.0200049	-0.0446418	6435	-0.123187	0.596074	1.03614
003_P08	SPAC637.11	rpm2	3522	63	0.0178876	-0.00114245	10839	173	0.0159609	-0.259807	14597	-0.204346	0.371245	1.05869	999	24	0.024024	-0.251891	7931	148	0.018661	-0.144976	9102	-0.139999	0.662711	1.02668
003_P09	SPAC1399.01C	SPAC1399.01C	4541	80	0.0176173	-0.0231094	11063	233	0.0210612	0.140239	15917	0.0832697	0.71083	1.04862	1212	37	0.0305281	0.0937669	8307	159	0.0191405	-0.108371	9715	-0.0437041	0.883714	1.01161
003_P10	SPAC9G1.06C	cyk3	1375	17	0.0123636	-0.533996	757	10	0.01321	-0.532713	2159	-0.580225	0.026469	0.4999	668	17	0.0254491	-0.168754	463	15	0.0323974	0.65088	1163	0.414797	0.809659	1.02157
003_P11	SPAC323.03C	SPAC323.03C	2470	34	0.0137652	-0.379076	7713	175	0.022689	0.247643	10392	0.116363	0.776891	1.03871	580	17	0.0293103	0.0350413	4012	107	0.02667	0.370219	4716	0.34747	0.584059	1.03701
003_P12	SPBC15D4.07C	atg9	5436	88	0.0161884	-0.145141	12253	244	0.0199135	0.0593983	18021	-0.0126463	0.989435	1.00086	756	12	0.015873	-0.849792	11454	275	0.0240091	0.218582	12497	0.147312	0.617221	1.02588
003_P13	SPBC25D12.05	trm1	4535	86	0.0189636	0.0831347	9728	182	0.0187089	-0.0306245	14531	-0.0110215	0.938775	1.01227	1287	36	0.027972	-0.0323838	6397	127	0.0198531	-0.055637	7847	-0.000733273	0.901199	1.01248
003_P14	SPBC215.13	SPBC215.13	4396	90	0.0204732	0.193634	13171	245	0.0186015	-0.038931	17902	0.0103162	0.911102	1.01398	913	27	0.0295728	0.047904	10973	210	0.0191379	-0.108567	12123	-0.090052	0.858947	1.01386
003_P15	SPCC1620.08	SPCC1620.08	2364	41	0.0173435	-0.0457055	11863	221	0.0186294	-0.0367704	14489	-0.0400417	0.840774	1.02783	551	17	0.030853	0.109042	11911	247	0.0207371	0.00721844	12726	-0.00267351	0.929737	1.00233
003_P16	SPBC31E1.01C	atg2	11191	239	0.0213564	0.254572	18772	405	0.0215747	0.174992	30607	0.182902	0.22653	1.00915	1594	51	0.031995	0.161477	15277	382	0.0250049	0.277213	17304	0.274146	0.306218	1.01152
003_P17	SPCC550.03C	SPCC550.03C	2991	109	0.0364427	1.02553	7450	353	0.0473826	1.31001	10903	1.22466	2.24017e-06	0.000321159	1069	48	0.0449018	0.650404	6839	458	0.0669689	1.69849	8414	1.59208	2.72873e-05	0.00660773
003_P18	SPBC887.04C	lub1	795	16	0.0201258	0.168946	1733	41	0.0236584	0.308004	2585	0.251988	0.857259	1.0265	496	13	0.0262097	-0.126269	1858	37	0.0199139	-0.0512233	2404	0.00113796	0.58973	1.03887
003_P19	SPAC105.01C	kha1	3474	71	0.0204375	0.191122	14229	301	0.021154	0.146581	18075	0.150332	0.461815	1.05778	846	23	0.0271868	-0.0734644	10156	249	0.0245175	0.248815	11274	0.220165	0.515122	1.03683
003_P20	SPCC1494.10	adn3	2789	56	0.0200789	0.16558	4607	114	0.024745	0.372786	7566	0.279741	0.462882	1.05715	560	11	0.0196429	-0.542364	3277	68	0.0207507	0.00816101	3916	-0.0438019	0.611891	1.03173
003_P21	SPAC1420.01C	SPAC1420.01C	6702	122	0.0182035	0.0241182	13748	257	0.0186936	-0.0318012	20829	-0.03088	0.997105	0.999641	876	11	0.0125571	-1.18787	8919	195	0.0218634	0.0835222	10001	-0.0131489	0.960297	1.00299
004_A01	SPCP31B10.06	mug190	30575	590	0.0192968	0.0819215	789	19	0.0240811	0.431401	31973	0.105499	0.393526	1.05723	27913	792	0.0283739	0.136069	687	61	0.0887918	0.184145	29453	-0.653472	0.127499	0.889947
004_A02	SPCC4B3.07	nro1	11332	230	0.0202965	0.15479	998	14	0.0140281	-0.348186	12574	0.132874	0.65177	1.05366	22710	767	0.0337737	0.387405	692	92	0.132948	0.766508	24261	-0.353976	0.498018	1.03894
004_A03	SPBC1711.13	his2	15495	362	0.0233624	0.357746	19523	352	0.01803	0.0138994	35732	0.175993	0.205473	1.00319	13172	439	0.0333283	0.368252	15522	1032	0.0664863	-0.233225	30165	0.127974	0.402488	1.03263
004_A04	SPAC30D11.05	aps3	3440	55	0.0159884	-0.189418	2998	50	0.0166778	-0.0985736	6543	-0.146129	0.382524	1.05554	2915	85	0.0291595	0.175473	2582	215	0.0832688	0.0914939	5797	0.218243	0.753397	1.01789
004_A05	SPBC1683.09C	frp1	9545	191	0.0200105	0.134315	2418	48	0.0198511	0.152719	12202	0.146597	0.623549	1.05963	8607	355	0.0412455	0.675742	2095	214	0.102148	0.386307	11271	0.180546	0.588554	1.03913
004_A06	SPAC1093.03	SPAC1093.03	5734	123	0.021451	0.234604	15131	290	0.019166	0.102044	21278	0.133223	0.449721	1.06648	4518	122	0.0270031	0.0646306	10249	568	0.05542	-0.495874	15457	-0.00578304	0.867703	1.01168
004_A07	SPBC216.01C	psy2	7755	184	0.0237266	0.380066	6742	137	0.0203204	0.186426	14818	0.294985	0.217649	0.997768	6663	258	0.0387213	0.584633	7045	798	0.113272	0.535435	14764	0.715517	0.0280388	0.534947
004_A08	SPAC12B10.01C	SPAC12B10.01C	14178	252	0.017774	-0.0366713	9716	179	0.0184232	0.0450239	24325	-0.000794642	0.837179	1.03022	11711	286	0.0244215	-0.0803435	8392	473	0.0563632	-0.471528	20862	-0.313314	0.544548	1.04019
004_A09	SPBC691.03C	apl3	15855	338	0.0213182	0.225644	14002	239	0.017069	-0.0651236	30434	0.098668	0.427437	1.06236	13718	451	0.0328765	0.348563	25022	1939	0.0774918	-0.012238	41130	0.395112	0.0784348	0.739259
004_A10	SPAC1B3.17	clr2	12717	264	0.0207596	0.187339	9747	197	0.0202113	0.178664	22925	0.185318	0.297762	1.04003	10625	381	0.0358588	0.473834	8457	726	0.085846	0.13547	20189	0.306368	0.232666	0.987107
004_A11	SPAC607.10	spo3	17183	322	0.0187395	0.0396378	17255	312	0.0180817	0.0180303	35072	0.0286474	0.60644	1.06203	15800	497	0.0314557	0.284827	13262	564	0.0425275	-0.877885	30123	-0.361784	0.522101	1.035
004_A12	SPAC222.07C	hri2	1122	32	0.0285205	0.645558	13052	264	0.0202268	0.179766	14470	0.210516	0.39058	1.05741	822	118	0.143552	2.47501	11507	1255	0.109064	0.480822	13702	1.2472	0.000261737	0.0433657
004_A13	SPAC12B10.12C	rhp41	14717	307	0.0208602	0.194314	22582	404	0.0178904	0.00268076	38010	0.0788785	0.420292	1.06389	12414	349	0.0281134	0.122765	15332	725	0.0472867	-0.724847	28820	-0.27736	0.690636	1.0265
004_A14	SPAC23G3.07C	snf30	30130	601	0.0199469	0.129723	13160	229	0.0174012	-0.0373132	44120	0.0872434	0.359439	1.06248	16269	455	0.0279673	0.115247	12173	505	0.0414853	-0.913683	29402	-0.474991	0.323561	1.0135
004_A15	SPAC17A2.09C	csx1	16127	399	0.0247411	0.44047	4266	103	0.0241444	0.435187	20895	0.447779	0.0294114	0.524088	9294	415	0.0446525	0.790245	2993	469	0.156699	1.00364	13171	0.616911	0.0647964	0.700959
004_A16	SPAC31G5.10	eta2	40820	727	0.0178099	-0.0337618	22450	432	0.0192428	0.107815	64429	0.0214529	0.492041	1.05428	34342	902	0.0262652	0.024659	17998	992	0.0551172	-0.503778	54234	-0.374552	0.563495	1.03615
004_A17	SPAC29B12.14C	SPAC29B12.14C	10226	196	0.0191668	0.0721708	15551	285	0.0183268	0.0374533	26258	0.0481184	0.635877	1.05334	15886	528	0.0332368	0.364288	7842	757	0.0965315	0.304718	25013	0.207103	0.317494	1.01883
004_A18	SPAC4H3.02C	swc3	17668	411	0.0232624	0.351559	15358	385	0.0250684	0.489367	33822	0.417332	0.0147272	0.360075	12227	483	0.0395027	0.613458	11159	747	0.0669415	-0.223381	24616	0.164939	0.385643	1.01251
004_A19	SPAC57A10.12C	ura3	7193	195	0.0271097	0.572368	4307	115	0.0267007	0.580377	11810	0.5788	0.0260048	0.494091	6689	295	0.0441023	0.772358	4406	626	0.142079	0.862339	12016	0.823289	0.0180005	0.464471
004_A20	SPAC821.09	eng1	26075	528	0.0202493	0.15143	22637	441	0.0194814	0.125595	49681	0.140385	0.211601	0.997591	39733	1159	0.0291697	0.175977	23727	1732	0.072997	-0.0984445	66351	-0.0423535	0.630535	1.01948
004_A21	SPBC1271.10C	SPBC1271.10C	168	6	0.0357143	0.97006	30454	552	0.0181257	0.0215353	31180	0.0138625	0.697014	1.05287	25067	732	0.0292017	0.17756	24466	1079	0.044102	-0.825437	51344	-0.359678	0.592142	1.03617
004_A22	SPBC106.11C	plg7	37086	773	0.0208434	0.193153	13465	256	0.0190123	0.0904283	51580	0.173597	0.148806	0.922073	46790	1613	0.0344732	0.41698	33883	2756	0.0813387	0.0576606	85042	0.207143	0.202208	0.974809
004_A23	SPCC1183.11	msy1	20114	450	0.0223725	0.295284	29068	558	0.0191964	0.104332	50190	0.183459	0.137826	0.896294	34049	1016	0.0298393	0.208722	29787	1484	0.0498204	-0.649545	66336	-0.260517	0.83352	1.01939
004_A24	SPBC13G1.08C	ash2	5882	290	0.049303	1.43523	4876	229	0.0469647	1.39508	11277	1.41849	2.72697e-08	5.05933e-06	7151	487	0.0681024	1.39921	5711	1633	0.285939	1.87136	14982	1.81287	9.83332e-08	0.000103184
004_B01	SPBC1709.13C	set10	10568	207	0.0195874	0.103487	3074	57	0.0185426	0.0543435	13906	0.100649	0.709645	1.04786	10001	319	0.0318968	0.304918	3039	300	0.0987167	0.337012	13659	0.0169929	0.860573	1.01198
004_B02	SPAC20G4.08	pdc1	13060	254	0.0194487	0.0932326	6859	137	0.0199738	0.161604	20310	0.121189	0.500298	1.05126	12065	277	0.022959	-0.169436	7818	675	0.0863392	0.143734	20835	0.0294235	0.690903	1.02593
004_B03	SPBC19F8.06C	meu22	11312	265	0.0234264	0.361697	8559	216	0.0252366	0.499016	20352	0.423538	0.0408352	0.593521	8343	236	0.0282872	0.131654	9476	866	0.0913888	0.225735	18921	0.398633	0.152878	0.929071
004_B05	SPBC24C6.06	gpa1	8442	162	0.0191898	0.0738961	10420	213	0.0204415	0.194997	19237	0.139574	0.468385	1.0552	7358	170	0.0231041	-0.160345	7742	457	0.0590287	-0.404866	15727	-0.176086	0.754523	1.01854
004_B06	SPAC13A11.06	SPAC13A11.06	6914	125	0.0180793	-0.0121054	7726	153	0.0198033	0.149237	14918	0.0733352	0.768746	1.04061	7053	186	0.0263718	0.0304993	9964	893	0.0896226	0.197581	18096	0.434644	0.130993	0.894501
004_B07	SPBC2G2.02	syj1	14118	256	0.0181329	-0.00783288	5410	105	0.0194085	0.120188	19889	0.0346205	0.786032	1.03773	16101	436	0.0270791	0.0686835	6421	616	0.0959352	0.295779	23574	-0.00627478	0.731981	1.0214
004_B08	SPAC4D7.10C	spt20	7649	149	0.0194797	0.0955283	8195	128	0.0156193	-0.193173	16121	-0.0458848	0.856359	1.02698	6450	170	0.0263566	0.0296693	13342	898	0.0673063	-0.215541	20860	0.20192	0.366265	1.00787
004_B09	SPBC365.07C	SPBC365.07C	8641	151	0.0174748	-0.0611626	14777	232	0.0157001	-0.18573	23801	-0.142108	0.642093	1.05367	7676	237	0.0308755	0.257966	11241	828	0.0736589	-0.0854214	19982	0.263096	0.288178	1.03089
004_B10	SPBC32H8.07	git5	3115	84	0.0269663	0.564716	4493	110	0.0244825	0.455251	7802	0.498633	0.11733	0.868685	2894	96	0.0331721	0.361475	5419	487	0.089869	0.201541	8896	0.580052	0.132569	0.897477
004_B11	SPBC530.08	SPBC530.08	7624	142	0.0186254	0.0308299	6971	139	0.0199398	0.159146	14876	0.0932618	0.705928	1.04924	7567	234	0.0309237	0.260221	6551	545	0.0831934	0.0901874	14897	0.234085	0.405039	1.02994
004_B12	SPAC1006.04C	mcp3	9943	204	0.0205169	0.170375	11596	186	0.01604	-0.154826	21929	0.00468873	0.855141	1.02708	12957	339	0.0261635	0.0190592	11129	433	0.0389074	-1.00624	24858	-0.549597	0.210717	0.988581
004_B14	SPAC8E11.05C	SPAC8E11.05C	7661	201	0.0262368	0.52515	2906	48	0.0165175	-0.112502	10816	0.384746	0.169738	0.968089	8344	154	0.0184564	-0.484375	3335	281	0.0842579	0.10853	12114	-0.332904	0.392093	1.01925
004_B15	SPCC1020.10	oca2	9234	183	0.0198181	0.120375	7902	157	0.0198684	0.153974	17476	0.13667	0.512071	1.06046	7855	195	0.024825	-0.0567034	9464	843	0.0890744	0.188729	18357	0.353376	0.199713	0.976238
004_B16	SPBC3E7.15C	lac1	30743	527	0.0171421	-0.088896	27341	424	0.0155078	-0.203503	59035	-0.14053	0.823435	1.03265	22348	502	0.0224629	-0.200953	20841	658	0.0315724	-1.30762	44349	-0.804614	0.0534414	0.681108
004_B17	SPCC1322.02	pxd1	26284	489	0.0186045	0.0292087	19187	313	0.0163131	-0.130468	46273	-0.0331786	0.762972	1.044	20333	525	0.0258201	0	15191	739	0.0486472	-0.683924	36788	-0.398872	0.479577	1.04046
004_B18	SPCC364.07	ser3	21568	347	0.0160886	-0.180398	11051	210	0.0190028	0.0897111	33176	-0.0798693	0.960652	1.00795	13029	327	0.0250979	-0.0409301	7998	560	0.0700175	-0.158566	21914	-0.153312	0.905308	1.01132
004_B19	SPCC1753.02C	git3	6467	177	0.0273697	0.58614	7368	169	0.022937	0.361177	14181	0.470615	0.0521841	0.658354	8864	262	0.0295578	0.195043	14640	1345	0.0918716	0.233337	25111	0.543389	0.0453525	0.637365
004_B20	SPBC8E4.04	SPBC8E4.04	24235	413	0.0170415	-0.0973913	29174	490	0.0167958	-0.0884027	54312	-0.094191	0.987056	1.0007	27093	572	0.0211125	-0.290399	22074	974	0.0441243	-0.824708	50713	-0.577225	0.223966	0.995828
004_B21	SPCC18B5.01C	bfr1	21927	736	0.0335659	0.880556	18240	483	0.0264803	0.568416	41386	0.749781	1.58826e-05	0.0016698	25811	1075	0.0416489	0.689784	31721	3185	0.100407	0.361501	61792	0.658414	0.00717153	0.289436
004_B22	SPAC13F5.04C	vta1	45882	882	0.0192232	0.0764094	8526	180	0.0211119	0.241555	55470	0.113059	0.251529	1.03029	50713	1570	0.0309585	0.261843	10678	1252	0.11725	0.585239	64213	-0.0293837	0.602783	1.03522
004_B23	SPCC584.13	SPCC584.13	23960	471	0.0196578	0.108658	11017	234	0.0212399	0.250276	35682	0.159383	0.237365	1.01719	25736	1003	0.0389726	0.593968	14367	1748	0.121668	0.638593	42854	0.548171	0.0247215	0.518822
004_B24	SPAC1639.01C	SPAC1639.01C	15953	328	0.0205604	0.173427	17831	296	0.0166003	-0.105292	34408	0.0333718	0.595862	1.06479	22262	927	0.0416405	0.689492	13215	1208	0.0914113	0.22609	37612	0.359278	0.10532	0.835135
004_C02	SPCC4B3.12	set9	63	0	0	--	8343	177	0.0212154	0.24861	8583	0.222424	0.554244	1.06009	2255	83	0.0368071	0.51149	8031	572	0.071224	-0.133918	10941	0.44081	0.213024	0.984726
004_C03	SPAC23H4.01C	osh3	52	3	0.0576923	1.66194	10276	197	0.0191709	0.102416	10528	0.101605	0.816878	1.03222	5323	150	0.0281796	0.126157	11354	968	0.0852563	0.125525	17795	0.514986	0.08303	0.757618
004_C05	SPBC1773.14	arg7	12051	211	0.0175089	-0.0583508	20045	343	0.0171115	-0.0615351	32650	-0.0643417	0.982439	1.00376	8467	209	0.0246841	-0.0649142	17744	750	0.0422678	-0.886722	27170	-0.358644	0.510238	1.03494
004_C06	SPAC10F6.13C	SPAC10F6.13C	2641	54	0.0204468	0.165434	5801	114	0.0196518	0.138159	8610	0.14097	0.776511	1.03908	2381	55	0.0230995	-0.16063	10335	828	0.0801161	0.0358106	13599	0.565766	0.0850728	0.765169
004_C07	SPAC2F7.03C	pom1	53	0	0	--	3661	72	0.0196668	0.139258	3786	0.103189	0.865611	1.02214	2407	72	0.0299128	0.212266	3900	416	0.106667	0.448756	6795	0.721853	0.0861329	0.76595
004_C08	SPAC139.05	SPAC139.05	10494	170	0.0161997	-0.170471	14859	273	0.0183727	0.0410627	25796	-0.0466839	0.988226	1.00092	9341	227	0.0243015	-0.0874509	19145	703	0.0367198	-1.08972	29416	-0.523025	0.257787	1.00559
004_C09	SPAPB1E7.06C	eme1	47	0	0	--	2456	56	0.0228013	0.352615	2559	0.309934	0.72858	1.0541	7268	231	0.0317832	0.299768	2221	316	0.142278	0.864361	10036	0.29721	0.42237	1.04039
004_C10	SPAC1B9.02C	sck1	6343	139	0.0219139	0.265407	19826	345	0.0174014	-0.0372985	26653	0.0353141	0.674634	1.0623	10944	283	0.0258589	0.00216759	17786	529	0.0297425	-1.39376	29542	-0.731081	0.0788964	0.741391
004_C11	SPCC23B6.04C	SPCC23B6.04C	59	1	0.0169492	-0.105228	12242	214	0.0174808	-0.0307297	12516	-0.0462731	0.774206	1.03953	10269	236	0.0229818	-0.168003	12744	1053	0.0826271	0.0803335	24302	0.255729	0.257879	1.00471
004_C12	SPAC222.13C	SPAC222.13C	7534	129	0.0171224	-0.0905578	20548	340	0.0165466	-0.109965	28551	-0.111892	0.795668	1.03657	6796	184	0.0270747	0.0684537	18004	626	0.0347701	-1.16844	25610	-0.522421	0.244749	0.996727
004_C13	SPAC19D5.07	uga1	49	2	0.0408163	1.16271	6226	178	0.0285898	0.678998	6455	0.668475	0.0419658	0.590893	15226	513	0.0336924	0.383928	6468	1000	0.154607	0.984255	23207	0.572041	0.0408089	0.603129
004_C14	SPAC23H3.13C	gpa2	205	1	0.00487805	-1.90206	336	6	0.0178571	0	548	--	--	0.158655	2754	76	0.0275962	0.0959765	319	49	0.153605	0.974872	3198	-0.205794	0.335749	1.00949
004_C15	SPAC17G6.03	SPAC17G6.03	55	1	0.0181818	-0.00394449	20984	367	0.0174895	-0.0300109	21407	-0.0451945	0.954476	1.01122	18138	417	0.0229904	-0.167462	16635	1234	0.0741809	-0.0752332	36424	0.017298	0.573441	1.03866
004_C16	SPAC3C7.01C	sac12	4752	69	0.0145202	-0.328379	16020	231	0.0144195	-0.308483	21072	-0.321512	0.185348	0.977572	8289	183	0.0220775	-0.225921	16855	704	0.041768	-0.903883	26031	-0.411283	0.407874	1.03131
004_C17	SPAC2G11.13	atg22	26621	473	0.0177679	-0.0371655	19190	321	0.0167275	-0.0942827	46605	-0.0583892	0.86449	1.02235	12319	261	0.0211868	-0.28533	13260	939	0.0708145	-0.142237	26779	0	0.682284	1.02278
004_C18	SPAC56F8.02	SPAC56F8.02	8823	203	0.023008	0.335698	9055	176	0.0194368	0.122288	18257	0.232178	0.269241	1.04322	8857	240	0.0270972	0.0696501	11881	533	0.0448615	-0.800803	21511	-0.331811	0.515645	1.03722
004_C19	SPAC5D6.04	SPAC5D6.04	21129	362	0.0171329	-0.0896758	8809	146	0.016574	-0.107583	30446	-0.0889835	0.900648	1.01706	25470	551	0.0216333	-0.255241	7853	466	0.0593404	-0.397268	34340	-0.620273	0.162945	0.948155
004_C20	SPAC8F11.08C	SPAC8F11.08C	27584	508	0.0184165	0.0145559	6366	116	0.0182218	0.0291645	34574	0.0263003	0.619132	1.0584	19378	472	0.0243575	-0.0841272	6021	412	0.0684272	-0.191713	26283	-0.430728	0.377227	1.01583
004_C21	SPBC1348.02	SPBC1348.02	45	1	0.0222222	0.285562	8776	178	0.0202826	0.183741	9000	0.169111	0.678932	1.06376	6646	219	0.0329522	0.351878	6845	295	0.0430972	-0.858689	14005	-0.300232	0.477428	1.04444
004_C22	SPBC11B10.07C	ivn1	4209	57	0.0135424	-0.428957	24851	428	0.0172226	-0.0521944	29545	-0.112884	0.801026	1.03415	7067	183	0.025895	0.0041795	25030	1973	0.0788254	0.0123789	34253	0.517844	0.0386378	0.590446
004_C23	SPCC1672.12C	get4	49	0	0	--	3856	75	0.0194502	0.123284	3980	0.0897339	0.842796	1.02791	11790	410	0.0347752	0.429566	2321	341	0.146919	0.910671	14862	0.18199	0.494433	1.03904
004_D01	SPBC1711.05	SPBC1711.05	7200	155	0.0215278	0.239758	3309	68	0.02055	0.202638	10732	0.233584	0.443621	1.06402	6573	253	0.0384908	0.576019	4041	527	0.130413	0.738737	11394	0.647503	0.0654706	0.701026
004_D02	SPAC1B3.08	SPAC1B3.08	1371	28	0.020423	0.163757	4677	66	0.0141116	-0.339619	6142	-0.215632	0.257447	1.03968	1100	33	0.03	0.216468	4862	496	0.102016	0.384437	6491	0.919397	0.0274426	0.529996
004_D03	SPBC1D7.05	byr2	11826	213	0.0180112	-0.0175497	13602	242	0.0177915	-0.00531302	25883	-0.0123856	0.857937	1.02653	9650	263	0.0272539	0.0779676	15197	1096	0.0721195	-0.115892	26206	0.221399	0.288237	1.02993
004_D04	SPCC550.07	SPCC550.07	7221	134	0.018557	0.0255215	7784	141	0.0181141	0.0206103	15280	0.0221542	0.930227	1.0145	6318	146	0.0231086	-0.160066	8430	602	0.0714116	-0.130123	15496	0.112516	0.613226	1.02957
004_D06	SPBC21C3.02C	dep1	3431	130	0.0378898	1.05537	814	23	0.0282555	0.662032	4398	0.997861	0.00479902	0.178072	1733	67	0.0386613	0.582395	594	92	0.154882	0.986817	2486	0.542481	0.458771	1.04502
004_D07	SPBC2G2.06C	apl1	4739	72	0.0151931	-0.263027	5084	92	0.018096	0.0191686	9987	-0.112374	0.526788	1.06165	3330	100	0.03003	0.217912	5638	585	0.10376	0.408899	9653	0.703243	0.0587568	0.690173
004_D09	SPBC3D6.02	but2	9342	164	0.0175551	-0.0545485	17952	277	0.01543	-0.21076	27735	-0.159639	0.617964	1.0587	8406	249	0.0296217	0.19816	15473	1237	0.0799457	0.0327388	25365	0.407617	0.109076	0.847829
004_D10	SPAC11G7.06C	mug132	36842	674	0.0182943	0.00495625	8275	141	0.0170393	-0.0676373	45932	0.0012948	0.630607	1.05682	12653	287	0.0226824	-0.186923	5944	588	0.0989233	0.340028	19472	0.00421047	0.767593	1.01914
004_D11	SPBC56F2.11	met6	16949	326	0.0192342	0.0772308	19197	306	0.01594	-0.16385	36778	-0.0457456	0.873771	1.02487	12350	382	0.0309312	0.260567	14402	600	0.0416609	-0.907588	27734	-0.353926	0.523078	1.03563
004_D12	SPAC1B3.10C	SPAC1B3.10C	41783	631	0.0151018	-0.271717	18322	296	0.0161554	-0.144481	61032	-0.22675	0.487017	1.05571	24646	441	0.0178934	-0.529069	15245	495	0.0324697	-1.26719	40827	-0.999557	0.0111533	0.347629
004_D13	SPBC8E4.03	SPBC8E4.03	14549	262	0.0180081	-0.0177941	16583	290	0.0174878	-0.0301534	31684	-0.0255641	0.839854	1.0291	9209	136	0.0147682	-0.806004	14932	1175	0.0786901	0.00989962	25452	0.211108	0.308221	1.01282
004_D14	SPBC12C2.03C	SPBC12C2.03C	14516	225	0.0155001	-0.23416	12033	202	0.0167872	-0.0891423	26976	-0.166256	0.589932	1.06323	7966	119	0.0149385	-0.78946	11706	861	0.073552	-0.0875168	20652	0.0866355	0.574523	1.03942
004_D15	SPCC11E10.05C	ynd1	20719	310	0.0149621	-0.285127	23468	328	0.0139765	-0.3535	44825	-0.3219	0.221318	0.99862	16400	347	0.0211585	-0.287254	21972	444	0.0202075	-1.95139	39163	-1.18638	0.00184675	0.141794
004_D16	SPBC4.06	SPBC4.06	18897	270	0.014288	-0.351639	7290	114	0.0156379	-0.191458	26571	-0.299579	0.238117	1.01902	10332	291	0.0281649	0.125405	6384	656	0.102757	0.394881	17663	0.272132	0.304094	1.01515
004_D17	SPCC1442.16C	zta1	10993	203	0.0184663	0.0184536	7311	132	0.018055	0.015896	18639	0.020168	0.861292	1.02356	14332	311	0.0216997	-0.25082	7903	835	0.105656	0.435022	23381	0.1357	0.447784	1.05432
004_D18	SPCC548.07C	ght1	28417	473	0.016645	-0.131355	9222	173	0.0187595	0.0711192	38285	-0.0725283	0.97084	1.0046	21942	383	0.0174551	-0.564845	8187	226	0.0276047	-1.50137	30738	-1.21471	0.00132439	0.122623
004_D19	SPCC1795.09	yps1	51142	922	0.0180282	-0.0161828	39240	630	0.016055	-0.153474	91934	-0.071813	0.854978	1.02728	23231	480	0.020662	-0.321511	46732	1413	0.0302362	-1.37	71856	-0.793992	0.0563873	0.685356
004_D20	SPAC1071.05	SPAC1071.05	11249	182	0.0161792	-0.172299	9780	174	0.0177914	-0.00532033	21385	-0.0923371	0.784677	1.03768	10447	232	0.0222073	-0.217458	9635	467	0.0484691	-0.689216	20781	-0.430613	0.341707	1.00251
004_D21	SPCC18B5.03	wee1	23447	554	0.0236278	0.374042	11334	236	0.0208223	0.221628	35571	0.331719	0.0405682	0.595126	18051	574	0.0317988	0.300478	9043	480	0.0530797	-0.558121	28148	-0.270173	0.701534	1.02195
004_D22	SPAC13G7.04C	mac1	28791	511	0.0177486	-0.0387356	10731	182	0.0169602	-0.0743473	40215	-0.0416347	0.832517	1.03011	23459	670	0.0285605	0.145525	15218	1512	0.099356	0.346326	40859	0.266101	0.173723	0.961125
004_D23	SPCC737.04	SPCC737.04	15162	280	0.0184672	0.0185258	13665	305	0.0223198	0.321823	29412	0.169182	0.263391	1.03712	18303	641	0.0350216	0.43975	13960	1796	0.128653	0.719135	34700	0.687151	0.00962295	0.318874
004_D24	SPAC1687.09	SPAC1687.09	34551	701	0.0202888	0.154246	11105	211	0.0190005	0.0895323	46568	0.146395	0.210682	0.999234	24777	840	0.0339024	0.392893	6410	756	0.117941	0.593708	32783	0.125441	0.390317	1.01799
004_E01	SPCP31B10.07	eft202	11321	189	0.0166946	-0.127056	2203	49	0.0222424	0.316811	13762	-0.0363945	0.835932	1.0303	8913	273	0.0306294	0.246424	1713	183	0.10683	0.450965	11082	-0.128567	0.746731	1.01983
004_E02	SPCC4G3.05C	mus81	1660	23	0.0138554	-0.39599	4917	90	0.0183038	0.0356454	6690	-0.0710129	0.549881	1.05816	1018	19	0.018664	-0.468232	5053	503	0.0995448	0.349064	6593	0.874041	0.0360195	0.572674
004_E04	SPAC6F6.04C	SPAC6F6.04C	7063	132	0.0186889	0.035744	6220	108	0.0173633	-0.0404564	13523	0.00161926	0.9555	1.01129	4353	146	0.0335401	0.377392	6194	619	0.0999354	0.354714	11312	0.628624	0.0742369	0.728031
004_E06	SPAC1142.02C	SPAC1142.02C	18934	296	0.0156333	-0.221823	28396	396	0.0139456	-0.356689	48022	-0.303817	0.261211	1.04023	9580	244	0.0254697	-0.0197107	28217	965	0.0341992	-1.19232	39006	-0.552532	0.242942	0.995809
004_E07	SPBC3E7.08C	rad13	13951	219	0.0156978	-0.215879	7314	122	0.0166803	-0.0983527	21606	-0.170543	0.530115	1.06225	8203	142	0.0173107	-0.576827	6639	578	0.0870613	0.15575	15562	0.0483088	0.745877	1.02044
004_E08	SPAC13A11.04C	ubp8	22465	504	0.0224349	0.299304	8200	168	0.0204878	0.198264	31337	0.280034	0.0888271	0.795911	14789	301	0.020353	-0.343255	7294	376	0.0515492	-0.600331	22760	-0.613783	0.143226	0.912701
004_E09	SPCC1393.07C	mug4	18639	353	0.0189388	0.0549028	5703	95	0.0166579	-0.100295	24790	0.0282169	0.725706	1.05333	12061	253	0.0209767	-0.299706	5572	486	0.0872218	0.158407	18372	-0.162706	0.831306	1.01827
004_E11	SPAC139.01C	SPAC139.01C	51215	818	0.0159719	-0.190907	44318	628	0.0141703	-0.333629	96979	-0.253838	0.37082	1.05843	28551	556	0.0194739	-0.406951	39497	1219	0.0308631	-1.3404	69823	-0.846808	0.0382014	0.586624
004_E12	SPAC22A12.06C	SPAC22A12.06C	14430	227	0.0157311	-0.21282	11731	139	0.0118489	-0.591742	26527	-0.367408	0.132692	0.890448	10867	227	0.0208889	-0.305756	8861	272	0.0306963	-1.34822	20227	-0.891208	0.0211621	0.479267
004_E13	SPBC17G9.08C	cnt5	46208	1290	0.0279172	0.614716	12639	275	0.0217581	0.285048	60412	0.559288	0.000278228	0.0195007	23397	1095	0.0468009	0.858041	9894	1413	0.142814	0.869782	35799	0.683331	0.00956529	0.320335
004_E15	SPAC1805.06C	hem2	35664	530	0.0148609	-0.294917	7022	116	0.0165195	-0.11233	43332	-0.254063	0.383487	1.05451	26706	464	0.0173744	-0.571533	7748	595	0.076794	-0.025288	35513	-0.610043	0.174321	0.957698
004_E16	SPAC3F10.13	ucp6	16573	282	0.0170156	-0.0995806	596	7	0.011745	-0.604459	17458	-0.100571	0.698306	1.05079	8067	191	0.0236767	-0.125026	419	86	0.205251	1.39303	8763	-0.523273	0.13678	0.914192
004_E17	SPAC343.12	rds1	27919	511	0.0183029	0.00563506	11245	188	0.0167185	-0.0950523	39863	-0.0160698	0.733973	1.05273	16509	366	0.0221697	-0.219903	9286	927	0.0998277	0.353158	27088	0.0955563	0.484317	1.04213
004_E18	SPAC589.05C	SPAC589.05C	45878	744	0.0162169	-0.168941	30454	445	0.0146122	-0.289328	77521	-0.212445	0.535801	1.06151	34741	705	0.020293	-0.34751	29763	857	0.0287941	-1.44051	66066	-0.954069	0.0160853	0.456184
004_E19	SPAC664.14	amt2	17349	298	0.0171768	-0.0859811	37073	584	0.0157527	-0.180902	55304	-0.155245	0.755096	1.04547	10361	248	0.0239359	-0.109317	25075	1161	0.0463011	-0.755235	36845	-0.238619	0.828598	1.01932
004_E20	SPAC9E9.12C	ybt1	8398	139	0.0165516	-0.139474	27538	465	0.0168858	-0.0806943	36540	-0.102715	0.895117	1.02068	8037	172	0.021401	-0.270815	27747	1318	0.0475006	-0.718335	37274	-0.172077	0.991908	1.00209
004_E21	SPBC15C4.04C	SPBC15C4.04C	16493	289	0.0175226	-0.0572253	39074	611	0.015637	-0.191538	56467	-0.156137	0.753492	1.046	8805	193	0.0219194	-0.236288	26630	947	0.0355614	-1.13597	36575	-0.544216	0.24912	0.996482
004_E22	SPBC11C11.11C	SPBC11C11.11C	11341	229	0.0201922	0.147359	18270	317	0.0173508	-0.0414951	30157	0.0309336	0.647139	1.05264	12146	361	0.0297217	0.203023	21490	2121	0.0986971	0.336725	36118	0.653422	0.0122923	0.37569
004_E23	SPCC1919.05	SPCC1919.05	18591	317	0.0170513	-0.0965625	1940	34	0.0175258	-0.0270232	20882	-0.078167	0.827537	1.03246	17806	467	0.0262271	0.0225648	1036	154	0.148649	0.927553	19463	-0.509361	0.229923	0.988793
004_E24	SPBC1683.04	SPBC1683.04	22648	456	0.0201342	0.143209	10182	171	0.0167943	-0.0885259	33457	0.0816166	0.448431	1.06663	17144	618	0.0360476	0.481409	7752	1341	0.172988	1.14632	26855	0.746129	0.00826928	0.289241
004_F03	SPBC21.05C	ral2	936	16	0.017094	-0.0929495	6875	121	0.0176	-0.0209258	7948	-0.0412374	0.663177	1.05533	547	22	0.0402194	0.639396	8608	675	0.0784154	0.0048557	9852	0.698524	0.0587284	0.692423
004_F04	SPAC25G10.04C	rec10	1391	30	0.0215672	0.242399	3077	69	0.0224244	0.328571	4567	0.295965	0.598071	1.06391	878	42	0.047836	0.889602	3002	327	0.108927	0.479013	4249	1.01949	0.0292887	0.542358
004_F05	SPBC24C6.09C	SPBC24C6.09C	4281	76	0.0177529	-0.0383894	5137	91	0.0177146	-0.0115608	9585	-0.0254786	0.757878	1.04519	2838	86	0.030303	0.230968	5562	602	0.108234	0.469806	9088	0.803945	0.0336258	0.554209
004_F06	SPBC2A9.11C	iss9	1850	29	0.0156757	-0.217913	864	17	0.0196759	0.13993	2760	-0.090621	0.410819	1.06294	766	24	0.0313316	0.279124	427	30	0.0702576	-0.153627	1247	-0.0516373	0.450626	1.05391
004_F07	SPBC2G5.04C	SPBC2G5.04C	39456	585	0.0148266	-0.298249	28900	456	0.0157785	-0.178537	69397	-0.245004	0.425222	1.06525	18714	346	0.0184888	-0.48184	26238	1551	0.0591127	-0.402813	46849	-0.15274	0.922881	1.00597
004_F09	SPBC3E7.09	SPBC3E7.09	26162	568	0.0217109	0.251977	34983	729	0.0208387	0.222764	62442	0.233038	0.0640901	0.719361	21466	860	0.0400634	0.633789	28560	1638	0.0573529	-0.446414	52524	0.0900208	0.38265	1.0114
004_F10	SPAC1556.02C	sdh1	6180	148	0.0239482	0.393477	3371	64	0.0189855	0.088394	9763	0.298506	0.336036	1.04522	5531	133	0.0240463	-0.10268	3224	240	0.0744417	-0.0701711	9128	-0.139006	0.665519	1.02598
004_F11	SPBC582.10C	SPBC582.10C	26518	439	0.0165548	-0.139192	8890	160	0.0179978	0.0113153	36007	-0.0933535	0.928934	1.0152	15133	307	0.0202868	-0.347954	8739	737	0.0843346	0.109843	24916	-0.101272	0.93509	1.00501
004_F12	SPAC1639.02C	trk2	37595	596	0.0158532	-0.201669	15114	209	0.0138282	-0.368884	53514	-0.240895	0.435734	1.06784	24220	432	0.0178365	-0.533662	8861	377	0.042546	-0.877259	33890	-0.939866	0.0178168	0.467395
004_F13	SPBP35G2.08C	air1	4005	91	0.0227216	0.317623	4592	125	0.0272213	0.608232	8813	0.477292	0.114354	0.871193	2597	127	0.0489026	0.921416	4524	594	0.1313	0.74851	7842	1.10984	0.00445492	0.233735
004_F14	SPBC1652.01	SPBC1652.01	11899	224	0.0188251	0.0462174	24596	403	0.0163848	-0.124145	37122	-0.0710675	0.973108	1.00464	9086	197	0.0216817	-0.252016	14716	445	0.0302392	-1.36986	24444	-0.798512	0.0460929	0.642038
004_F15	SPCC11E10.09C	SPCC11E10.09C	19966	327	0.0163778	-0.154696	43367	583	0.0134434	-0.409603	64243	-0.328925	0.206863	1.00222	12707	258	0.0203038	-0.346747	23633	1100	0.0465451	-0.747653	37698	-0.328149	0.627283	1.02104
004_F16	SPBC409.10	ade7	38794	667	0.0171934	-0.0845877	21341	291	0.0136357	-0.38911	61093	-0.180013	0.66203	1.05617	13425	213	0.0158659	-0.702563	10518	400	0.03803	-1.03914	24556	-0.873719	0.0266294	0.530566
004_F17	SPCC1442.17C	ist1	19809	333	0.0168105	-0.117075	12053	181	0.015017	-0.249904	32376	-0.161903	0.642527	1.05329	9311	182	0.0195468	-0.401564	6796	385	0.056651	-0.464181	16674	-0.414342	0.329912	1.01621
004_F18	SPCC584.15C	SPCC584.15C	49951	764	0.015295	-0.253382	24052	334	0.0138866	-0.36281	75101	-0.282612	0.309392	1.05153	15490	283	0.0182699	-0.499029	9845	288	0.0292534	-1.41768	25906	-1.05764	0.00585381	0.259546
004_F19	SPCC18.02	SPCC18.02	41279	734	0.0177814	-0.0360689	15681	224	0.0142848	-0.32202	57918	-0.101758	0.989341	1.00109	13874	362	0.026092	0.0151116	9406	524	0.0557091	-0.488368	24166	-0.301787	0.600234	1.03423
004_F20	SPAC110.02	pds5	35936	969	0.0269646	0.564626	21355	592	0.0277218	0.634522	58852	0.594256	0.000140255	0.0107894	13860	441	0.0318182	0.301357	20123	2256	0.112111	0.520568	36680	0.758468	0.00463494	0.227981
004_F21	SPCC18B5.11C	cds1	22548	373	0.0165425	-0.140265	5385	93	0.0172702	-0.0482169	28399	-0.113475	0.788349	1.03905	19926	418	0.0209776	-0.299644	6801	704	0.103514	0.405475	27849	-0.1603	0.954524	1.00396
004_F22	SPAC13G7.05	are1	33879	592	0.017474	-0.0612351	7667	146	0.0190427	0.092733	42284	-0.0229229	0.744736	1.04861	37453	928	0.0247777	-0.0594508	8983	1053	0.117221	0.584882	48417	-0.137089	0.88006	1.01
004_F23	SPCC74.02C	ppn1	13292	628	0.0472465	1.37377	10914	473	0.0433388	1.27916	25307	1.33354	6.49925e-11	1.70822e-08	6319	508	0.0803925	1.63857	5857	1379	0.235445	1.59103	14063	1.72398	5.16553e-07	0.000325222
004_F24	SPAC1687.13C	csn5	19253	475	0.0246715	0.436403	13679	254	0.0185686	0.0563645	33661	0.294595	0.0682839	0.725142	17599	738	0.0419342	0.699633	12455	966	0.0775592	-0.0109836	31758	0.273294	0.195128	0.98282
004_G01	SPCPB1C11.03	SPCPB1C11.03	10354	240	0.0231794	0.346405	3712	78	0.0210129	0.234776	14384	0.324981	0.180751	0.977855	10860	388	0.0357274	0.468538	3831	462	0.120595	0.625818	15541	0.302528	0.293935	1.01794
004_G02	SPCC4G3.19	alp16	9758	155	0.0158844	-0.19883	9980	178	0.0178357	-0.00173575	20071	-0.0972878	0.748938	1.04705	7585	211	0.0278181	0.107528	11017	861	0.0781519	0	19674	0.296773	0.248992	0.997236
004_G03	SPBC4F6.09	str1	11908	233	0.0195667	0.101958	20292	366	0.0180367	0.0144313	32799	0.0436612	0.575664	1.0674	10359	290	0.027995	0.116674	32975	2528	0.0766641	-0.0277299	46152	0.471098	0.0423005	0.61365
004_G04	SPBC1604.01	egt1	3755	74	0.0197071	0.112271	18687	264	0.0141275	-0.337998	22780	-0.261012	0.302849	1.0485	1914	52	0.0271682	0.0734265	11679	470	0.0402432	-0.957538	14115	-0.288817	0.499536	1.03866
004_G05	SPCC1919.12C	SPCC1919.12C	29098	541	0.0185923	0.0282676	30213	466	0.0154238	-0.211341	60318	-0.088142	0.945856	1.01333	18248	383	0.0209886	-0.298888	24925	910	0.0365095	-1.09801	44466	-0.647482	0.148575	0.929846
004_G06	SPAC11D3.09	SPAC11D3.09	18606	270	0.0145114	-0.329249	21810	327	0.0149931	-0.2522	41013	-0.28903	0.289225	1.04015	11659	220	0.0188695	-0.452435	24142	1040	0.0430785	-0.859315	37061	-0.414651	0.450967	1.05393
004_G07	SPAP27G11.10C	nup184	22724	299	0.0131579	-0.470512	2082	49	0.0235351	0.39831	25154	-0.363436	0.135844	0.894472	17540	318	0.01813	-0.510116	1322	87	0.0658094	-0.247989	19267	-1.12756	0.00267636	0.179259
004_G08	SPAC144.17C	SPAC144.17C	16584	248	0.0149542	-0.285893	30582	488	0.0159571	-0.162303	47902	-0.209876	0.531775	1.06423	10858	252	0.0232087	-0.153829	25251	1085	0.0429686	-0.862999	37446	-0.341434	0.597762	1.0345
004_G09	SPAC6F6.01	cch1	26508	480	0.0181077	-0.00983438	28493	541	0.0189871	0.0885198	56022	0.040619	0.449669	1.06716	13834	413	0.029854	0.209429	27203	2608	0.0958718	0.294824	44058	0.650026	0.0101637	0.333286
004_G10	SPAC1F7.09C	SPAC1F7.09C	38629	695	0.0179917	-0.0191123	8670	149	0.0171857	-0.0552928	48143	-0.0164008	0.687176	1.05828	18711	460	0.0245845	-0.0707471	5989	503	0.0839873	0.10389	25663	-0.266978	0.687887	1.02629
004_G11	SPBC3E7.12C	cfh4	101	2	0.019802	0.119204	87	2	0.0229885	0.364411	192	--	--	0.158655	163	9	0.0552147	1.09656	224	25	0.111607	0.514076	421	--	--	0.158655
004_G12	SPAC22H10.11C	SPAC22H10.11C	119	2	0.0168067	-0.117403	98	0	0	--	219	--	--	0.158655	141	6	0.0425532	0.720773	435	33	0.0758621	-0.0429031	615	--	--	0.158655
004_G13	SPAC1783.07C	pap1	79	1	0.0126582	-0.526366	42842	677	0.0158023	-0.176371	43599	-0.192233	0.583783	1.06554	19500	447	0.0229231	-0.171694	21282	1093	0.051358	-0.605694	42322	-0.313077	0.676534	1.02588
004_G14	SPAC25H1.07	emc1	17269	287	0.0166194	-0.133575	51230	653	0.0127464	-0.486407	69439	-0.395256	0.100393	0.837672	10371	238	0.0229486	-0.170088	37820	1127	0.029799	-1.39102	49556	-0.727937	0.0915327	0.77877
004_G15	SPAC1A6.03C	SPAC1A6.03C	110	1	0.00909091	-1.00394	5140	79	0.0153696	-0.216417	5330	-0.244152	0.211129	0.999853	13504	358	0.0265107	0.0380784	4890	464	0.0948875	0.279937	19216	-0.0700995	0.941235	1.00305
004_G16	SPAC3G9.05	spa2	53587	911	0.0170004	-0.100873	46739	654	0.0139926	-0.351837	101891	-0.210367	0.515736	1.0597	20513	434	0.0211573	-0.287338	31213	919	0.0294429	-1.40836	53079	-0.842802	0.0408651	0.601137
004_G17	SPAC3C7.06C	pit1	113	1	0.00884956	-1.04276	9710	178	0.0183316	0.0378328	10002	0.0138899	0.89054	1.02137	43476	737	0.0169519	-0.607049	10857	633	0.0583034	-0.422702	55703	-0.895727	0.0269944	0.527815
004_G18	SPAC5H10.10	SPAC5H10.10	56287	863	0.0153321	-0.249882	17134	267	0.0155831	-0.196524	74551	-0.229776	0.474475	1.05834	19373	361	0.0186342	-0.470543	8918	289	0.0324064	-1.27	28941	-1.02991	0.00783161	0.286674
004_G19	SPAC869.03C	SPAC869.03C	43440	752	0.0173112	-0.0747324	13603	226	0.016614	-0.104103	58021	-0.0740495	0.889764	1.02234	19644	403	0.0205152	-0.331803	14881	1208	0.0811773	0.0547953	36136	-0.00775946	0.628281	1.02161
004_G20	SPACUNK4.17	SPACUNK4.17	34878	645	0.018493	0.0205409	27476	411	0.0149585	-0.255535	63410	-0.0917783	0.956127	1.01161	12719	289	0.0227219	-0.18441	18358	880	0.0479355	-0.705187	32246	-0.318647	0.622444	1.02268
004_G21	SPBC16A3.02C	SPBC16A3.02C	152	4	0.0263158	0.529488	38987	554	0.0142099	-0.329608	39697	-0.340176	0.184692	0.977381	16105	386	0.0239677	-0.107402	37767	1291	0.0341833	-1.19299	55549	-0.591727	0.208555	0.985784
004_G22	SPBC1271.09	SPBC1271.09	34234	638	0.0186364	0.0316856	17732	306	0.0172569	-0.0493249	52910	0.00938472	0.568989	1.06315	17559	478	0.0272225	0.0763056	13126	1040	0.0792321	0.0198025	32203	0.0765637	0.480949	1.03843
004_G23	SPCC24B10.19C	nts1	23890	438	0.018334	0.00808305	7929	144	0.0181612	0.0243567	32401	0.0192965	0.664753	1.05624	18046	548	0.0303668	0.234002	9298	1137	0.122284	0.645886	29029	0.39345	0.104964	0.836524
004_G24	SPBC1683.12	SPBC1683.12	14124	303	0.0214528	0.234728	13784	257	0.0186448	0.0622725	28468	0.152914	0.307636	1.05009	8746	343	0.0392179	0.603019	8516	638	0.0749178	-0.0609732	18243	0.276651	0.290556	1.02657
004_H02	SPAC1952.15C	rec24	2054	33	0.0160662	-0.182411	12278	226	0.0184069	0.0437459	14591	0.00187803	0.983795	1.00352	1350	25	0.0185185	-0.479526	10012	547	0.0546344	-0.516471	11934	0.101796	0.726189	1.0233
004_H03	SPBC23G7.06C	SPBC23G7.06C	14866	253	0.0170187	-0.0993201	11052	193	0.0174629	-0.0322079	26364	-0.0687448	0.935189	1.01325	9257	238	0.0257103	-0.00614939	10974	978	0.0891197	0.189463	21447	0.357501	0.169733	0.95756
004_H04	SPAC1F3.10C	2016-10-01	2321	52	0.0224041	0.297324	1366	17	0.0124451	-0.520924	3756	0.0523148	0.73887	1.05067	1265	34	0.0268775	0.057903	1150	91	0.0791304	0.0179509	2540	0.14183	0.845933	1.01874
004_H05	SPBC27B12.11C	pho7	11574	210	0.0181441	-0.00693918	15130	222	0.0146728	-0.283354	27136	-0.157859	0.619248	1.05802	9224	251	0.0272116	0.0757286	15305	637	0.0416204	-0.908991	25417	-0.373931	0.46961	1.04328
004_H06	SPBC725.07	pex5	11546	197	0.0170622	-0.0956385	3855	54	0.0140078	-0.350273	15652	-0.147171	0.52945	1.06294	8207	203	0.024735	-0.0619415	3172	294	0.092686	0.24607	11876	-0.103131	0.823528	1.01945
004_H07	SPBC30B4.04C	sol1	11009	199	0.0180761	-0.012356	3990	49	0.0122807	-0.540108	15247	-0.12636	0.583331	1.06533	5345	169	0.0316183	0.292267	2859	256	0.0895418	0.196279	8629	0.143061	0.759576	1.02098
004_H08	SPAC26F1.14C	aif1	28676	423	0.014751	-0.305627	12521	215	0.0171712	-0.0565144	41835	-0.220817	0.481448	1.05744	14977	287	0.0191627	-0.430192	10831	833	0.0769089	-0.0231318	26928	-0.112394	0.939967	1.00442
004_H09	SPBC3E7.11C	SPBC3E7.11C	30569	487	0.0159312	-0.194589	23991	364	0.0151724	-0.235056	55411	-0.210519	0.540532	1.06287	13570	234	0.0172439	-0.582407	17621	882	0.0500539	-0.642799	32307	-0.390867	0.47721	1.04469
004_H10	SPAC29B12.02C	set2	21367	379	0.0177376	-0.0396275	10057	153	0.0152133	-0.23117	31956	-0.0922747	0.901363	1.01568	8347	151	0.0180903	-0.513275	4994	295	0.0590709	-0.403835	13787	-0.488826	0.211639	0.98702
004_H11	SPBC713.07C	SPBC713.07C	70	1	0.0142857	-0.351868	47	0	0	--	118	--	--	0.158655	56	1	0.0178571	-0.531993	106	37	0.349057	2.15911	200	--	--	0.158655
004_H12	SPAC222.05C	mss1	182	5	0.0274725	0.591549	56	1	0.0178571	0	244	--	--	0.158655	259	5	0.019305	-0.419518	71	23	0.323944	2.05139	358	--	--	0.158655
004_H13	SPBP4G3.02	pho1	14449	254	0.0175791	-0.0525821	10303	209	0.0202854	0.183937	25215	0.051633	0.638549	1.05499	5903	143	0.024225	-0.0919994	6320	569	0.0900316	0.20415	12935	0.312276	0.327073	1.01142
004_H14	SPBC16C6.08C	qcr6	20790	320	0.015392	-0.244259	19448	318	0.0163513	-0.127096	40876	-0.186836	0.594309	1.06382	7570	108	0.0142668	-0.855828	10963	478	0.0436012	-0.841914	19119	-0.569198	0.167627	0.954231
004_H15	SPCC1223.02	nmt1	44414	725	0.0163237	-0.159474	21004	372	0.0177109	-0.0118627	66515	-0.10603	0.984859	1.00234	19962	381	0.0190863	-0.43596	16051	1109	0.0690923	-0.177758	37503	-0.18128	0.970605	1.00377
004_H16	SPBC428.17C	wpl1	35342	635	0.0179673	-0.0210681	19544	318	0.016271	-0.1342	55839	-0.0557961	0.817761	1.03086	16469	297	0.0180339	-0.517784	12009	786	0.0654509	-0.255869	29561	-0.302889	0.640026	1.0145
004_H17	SPCC1450.02	bdf1	33347	610	0.0182925	0.0048113	36041	643	0.0178408	-0.00132157	70641	0.000794204	0.556204	1.06062	17286	404	0.0233715	-0.143743	27878	1308	0.0469187	-0.736118	46876	-0.307565	0.700892	1.02433
004_H18	SPCC777.03C	SPCC777.03C	27291	422	0.015463	-0.237623	21700	290	0.0133641	-0.418143	49703	-0.312474	0.24281	1.02383	14371	334	0.0232412	-0.151807	21554	803	0.0372553	-1.06884	37062	-0.56783	0.221509	0.990497
004_H19	SPCC18.17C	SPCC18.17C	41176	636	0.0154459	-0.239218	32222	453	0.0140587	-0.345036	74487	-0.282643	0.30975	1.04936	15972	318	0.0199098	-0.375013	22397	663	0.0296022	-1.40058	39350	-0.875691	0.0308342	0.554663
004_H20	SPAC11D3.06	SPAC11D3.06	35380	618	0.0174675	-0.0617682	23570	375	0.0159101	-0.166562	59943	-0.0995322	0.996608	0.999778	17109	331	0.0193465	-0.416419	20274	758	0.0373878	-1.06371	38472	-0.687453	0.113271	0.859222
004_H21	SPCC417.07C	mto1	23164	496	0.0214125	0.232015	4634	110	0.0237376	0.410672	28404	0.272503	0.110319	0.854907	18387	533	0.0289879	0.166955	5631	814	0.144557	0.887284	25365	0.257559	0.247782	0.996191
004_H22	SPAC13G7.13C	msa1	11653	203	0.0174204	-0.0656627	3856	81	0.0210062	0.234316	15793	0.0209511	0.921789	1.01442	13159	320	0.024318	-0.0864723	4814	542	0.112588	0.526703	18835	0.031854	0.717571	1.0226
004_H23	SPCC757.05C	SPCC757.05C	25275	487	0.0192681	0.0797697	13496	223	0.0165234	-0.111989	39481	0.021007	0.598519	1.06351	17269	422	0.0244369	-0.0794359	10451	397	0.0379868	-1.04078	28539	-0.667066	0.116138	0.868412
004_H24	SPAC16E8.13	SPAC16E8.13	22987	399	0.0173576	-0.0708704	5731	107	0.0186704	0.0642507	29224	-0.034652	0.901066	1.01644	15965	484	0.0303163	0.2316	3859	719	0.186318	1.25341	21027	0.371314	0.16039	0.941993
004_I01	SPBC14F5.09C	ade8	12932	256	0.0197959	0.118757	6096	121	0.0198491	0.152571	19405	0.134606	0.478967	1.05641	11826	382	0.0323017	0.323116	7753	776	0.10009	0.356948	20737	0.334254	0.197651	0.976775
004_I02	SPCC550.09	SPCC550.09	5730	112	0.0195462	0.100451	5234	88	0.0168131	-0.0869117	11164	0.0153916	0.932631	1.01362	3755	109	0.029028	0.168949	6041	474	0.0784638	0.00574595	10379	0.343229	0.343751	1.0029
004_I03	SPAC18G6.05C	SPAC18G6.05C	22373	372	0.0166272	-0.132897	30361	458	0.0150851	-0.243373	53564	-0.197456	0.586026	1.0647	15824	420	0.026542	0.0397807	26357	1038	0.0393823	-0.988733	43639	-0.440677	0.419833	1.04066
004_I04	SPBC18E5.05C	elp5	8513	151	0.0177376	-0.0396319	23618	360	0.0152426	-0.228391	32642	-0.182477	0.57283	1.06653	6549	199	0.0303863	0.234928	28359	1780	0.0627667	-0.316283	36887	0.273139	0.177263	0.960457
004_I05	SPAC22G7.01C	fra1	25619	424	0.0165502	-0.139591	16378	276	0.0168519	-0.0835922	42697	-0.114765	0.88169	1.02501	14986	376	0.0250901	-0.041377	23217	2004	0.0863161	0.143347	40583	0.409201	0.0720449	0.724592
004_I06	SPAC11D3.15	SPAC11D3.15	2249	51	0.0226767	0.314773	5749	132	0.0229605	0.362654	8181	0.342298	0.310081	1.04823	1754	56	0.031927	0.306284	5879	700	0.119068	0.60743	8389	1.07806	0.00497096	0.240747
004_I07	SPBC800.03	clr3	5823	171	0.0293663	0.687721	3375	102	0.0302222	0.759108	9471	0.717675	0.0102755	0.286805	2698	84	0.0311342	0.270005	2722	369	0.135562	0.7946	5873	0.833144	0.055587	0.686227
004_I08	SPAC16E8.14C	tae1	22318	369	0.0165337	-0.141028	24977	348	0.0139328	-0.358014	48012	-0.251549	0.397472	1.0615	9653	214	0.0221693	-0.219933	29219	1389	0.0475376	-0.717214	40475	-0.186031	0.972713	1.00496
004_I09	SPBC31F10.13C	hip1	24509	506	0.0206455	0.179385	2364	41	0.0173435	-0.0421074	27420	0.173549	0.272578	1.04081	11614	319	0.0274669	0.0891972	1892	198	0.104651	0.421235	14023	-0.293439	0.489724	1.03885
004_I10	SPAC20G4.03C	hri1	49562	793	0.0160002	-0.188355	38120	572	0.0150052	-0.251034	89047	-0.213286	0.522129	1.0604	24433	507	0.0207506	-0.31534	28865	1025	0.0355101	-1.13805	54830	-0.70674	0.105545	0.832719
004_I11	SPAC6G10.02C	tea3	29149	476	0.0163299	-0.158926	14103	193	0.013685	-0.383903	43921	-0.222595	0.48067	1.05794	11199	236	0.0210733	-0.293077	14920	1389	0.0930965	0.252445	27744	0.407266	0.100451	0.815003
004_I12	SPAC23A1.02C	SPAC23A1.02C	37627	612	0.0162649	-0.164678	35344	476	0.0134676	-0.407005	74059	-0.275551	0.329646	1.04598	20941	353	0.0168569	-0.615156	29675	1123	0.0378433	-1.04624	52092	-0.685975	0.120051	0.876843
004_I13	SPAC26A3.09C	rga2	63387	1106	0.0174484	-0.0633485	24506	417	0.0170162	-0.0695889	89416	-0.0587384	0.79434	1.03655	33715	648	0.0192199	-0.425891	24730	1565	0.0632835	-0.304453	60658	-0.309151	0.714465	1.0242
004_I14	SPAC27D7.11C	SPAC27D7.11C	27267	423	0.0155133	-0.232939	35445	546	0.0154041	-0.213182	63681	-0.224079	0.496982	1.04848	16820	316	0.0187872	-0.458747	30937	757	0.0244691	-1.67532	48830	-1.06214	0.00635462	0.270329
004_I15	SPAC227.11C	SPAC227.11C	18892	286	0.0151387	-0.268201	28484	409	0.0143589	-0.314552	48071	-0.298978	0.272298	1.041	12545	222	0.0176963	-0.545047	42577	1203	0.0282547	-1.46779	56547	-0.859741	0.035812	0.572266
004_I16	SPAC3H5.04	aar2	73465	1709	0.0232628	0.351582	33684	714	0.021197	0.247359	109572	0.325342	0.011185	0.301516	25146	671	0.0266842	0.0474895	21498	1101	0.0512141	-0.609742	48416	-0.304387	0.711453	1.02642
004_I17	SPAC3H8.09C	nab3	46131	715	0.0154993	-0.234234	22163	345	0.0155665	-0.198058	69354	-0.217601	0.520103	1.05969	25086	369	0.0147094	-0.811756	15507	434	0.0279874	-1.48151	41396	-1.24583	0.000979329	0.0963415
004_I18	SPAC631.02	bdf2	16720	299	0.0178828	-0.0278703	34199	424	0.012398	-0.526391	51642	-0.346043	0.177936	0.979422	10463	225	0.0215043	-0.263866	28529	1190	0.0417119	-0.905821	40407	-0.370451	0.547073	1.03934
004_I19	SPAC977.16C	dak2	39081	612	0.0156598	-0.219377	35282	554	0.0157021	-0.185548	75529	-0.202923	0.573325	1.06682	22959	406	0.0176837	-0.546074	26305	1364	0.0518533	-0.591847	51034	-0.384859	0.538582	1.04016
004_I20	SPAP8A3.13C	SPAP8A3.13C	47378	808	0.0170543	-0.096303	30035	483	0.0160812	-0.151123	78704	-0.113993	0.955214	1.01133	27051	408	0.0150826	-0.775607	52413	1633	0.0311564	-1.32675	81505	-0.8691	0.0302938	0.554448
004_I21	SPBC16G5.17	SPBC16G5.17	36507	671	0.01838	0.0116987	11131	210	0.0188662	0.0793049	48519	0.0351951	0.496874	1.04896	20895	425	0.0203398	-0.344189	9533	885	0.0928354	0.248393	31738	-0.123907	0.925868	1.00435
004_I22	SPBC1271.14	SPBC1271.14	9277	186	0.0200496	0.137131	14827	316	0.0213125	0.255197	24606	0.206581	0.235666	1.01543	11879	305	0.0256756	-0.00809848	16420	1526	0.0929354	0.249947	30130	0.463806	0.0643962	0.70145
004_I24	SPBC1685.15C	klp6	24027	512	0.0213094	0.225046	2106	42	0.019943	0.159383	26687	0.232179	0.173648	0.974531	22843	892	0.0390492	0.596797	2235	244	0.109172	0.482253	26214	-0.050534	0.802034	1.02053
004_J01	SPBC17D11.02C	hrd1	2793	67	0.0239885	0.395905	3335	71	0.0212894	0.253631	6266	0.319346	0.441429	1.06769	2841	99	0.0348469	0.432535	3112	304	0.0976864	0.321876	6356	0.529088	0.241797	0.99241
004_J02	SPBC16A3.10	SPBC16A3.10	3247	72	0.0221743	0.282449	2150	46	0.0213953	0.260796	5515	0.276723	0.580457	1.0675	3560	80	0.0224719	-0.200372	2363	265	0.112146	0.521019	6268	0.312194	0.550902	1.03785
004_J03	SPBC23G7.08C	rga7	2107	54	0.0256289	0.491328	3361	70	0.0208271	0.221963	5592	0.329421	0.457941	1.05968	1534	39	0.0254237	-0.0223187	3303	278	0.0841659	0.106954	5154	0.482296	0.349888	1.00314
004_J04	SPAC18B11.10	tup11	4042	104	0.0257298	0.497001	3815	92	0.0241153	0.43345	8053	0.466969	0.141111	0.902766	2429	74	0.0304652	0.238668	3851	500	0.129836	0.732341	6854	0.962212	0.0185203	0.466414
004_J05	SPBC29B5.02C	isp4	23108	374	0.0161849	-0.171795	30669	491	0.0160097	-0.157559	54642	-0.166123	0.709465	1.04808	10680	231	0.0216292	-0.255513	29957	1067	0.0356177	-1.13369	41935	-0.554578	0.244476	0.999494
004_J06	SPBC947.04	pfl3	1996	57	0.0285571	0.647409	3161	67	0.0211958	0.247279	5281	0.413902	0.316894	1.04549	1021	35	0.0342801	0.408878	3294	219	0.0664845	-0.233263	4569	0.327393	0.629885	1.02
004_J07	SPBC32H8.02C	nep2	23713	405	0.0170792	-0.0941972	19801	288	0.0145447	-0.296006	44207	-0.180458	0.628599	1.05795	14550	328	0.022543	-0.195818	15967	877	0.0549258	-0.508798	31722	-0.248655	0.775887	1.01983
004_J08	SPAC21E11.05C	cyp8	15486	351	0.0226656	0.314066	6233	124	0.0198941	0.15584	22194	0.277136	0.148765	0.923634	7303	219	0.0299877	0.215875	4935	658	0.133333	0.770684	13115	0.611206	0.0675496	0.70882
004_J09	SPBC3E7.16C	leu3	21894	304	0.0138851	-0.392905	27504	393	0.0142888	-0.321613	50095	-0.355128	0.162806	0.96521	11463	252	0.0219838	-0.232055	26219	1099	0.0419162	-0.898775	39033	-0.387922	0.507908	1.03488
004_J10	SPAC3A11.02	cps3	3585	79	0.0220363	0.273439	4574	88	0.0192392	0.107546	8326	0.18155	0.674244	1.06222	2672	56	0.0209581	-0.300988	4835	357	0.0738366	-0.0819455	7920	0.229831	0.619313	1.02395
004_J11	SPBC725.14	arg6	9808	174	0.0177406	-0.0393845	3871	74	0.0191165	0.0983177	13927	0.00654323	0.982547	1.00322	3118	84	0.0269403	0.0612741	2228	240	0.10772	0.462931	5670	0.369459	0.487486	1.04112
004_J12	SPAC24B11.07C	SPAC24B11.07C	43281	670	0.0154802	-0.236014	22011	300	0.0136295	-0.389763	66262	-0.280756	0.319398	1.04718	17211	418	0.0242868	-0.0883223	15947	1135	0.0711733	-0.134946	34711	-0.0023737	0.624973	1.02097
004_J14	SPBC23G7.10C	SPBC23G7.10C	12011	182	0.0151528	-0.266859	6729	122	0.0181305	0.0219159	19044	-0.153884	0.553071	1.05977	7454	148	0.0198551	-0.378984	7839	610	0.077816	-0.0062141	16051	0.0793238	0.669384	1.02691
004_J15	SPCC1235.12C	mug146	33435	562	0.0168087	-0.11723	26775	351	0.0131092	-0.445917	61123	-0.251222	0.406496	1.06574	15187	289	0.0190294	-0.440262	17756	539	0.0303559	-1.3643	33771	-0.900344	0.0244735	0.520558
004_J16	SPCC1259.09C	pdx1	33040	510	0.0154358	-0.240157	10222	163	0.015946	-0.163307	43935	-0.214328	0.507998	1.05548	15243	298	0.01955	-0.401329	6793	476	0.0700721	-0.157441	22810	-0.417531	0.376614	1.01767
004_J17	SPCC1620.07C	lnp1	39045	636	0.0162889	-0.162552	15103	241	0.0159571	-0.162303	55025	-0.156165	0.750777	1.04684	14901	346	0.0232199	-0.153131	9934	502	0.0505335	-0.629041	25683	-0.458313	0.331304	1.01651
004_J18	SPCPB16A4.05C	SPCPB16A4.05C	40667	590	0.0145081	-0.329585	17198	276	0.0160484	-0.154074	58731	-0.270158	0.349938	1.05618	14729	235	0.0159549	-0.694493	14566	507	0.0348071	-1.1669	30037	-0.889238	0.0256834	0.521621
004_J19	SPCC1827.02C	SPCC1827.02C	60075	1002	0.0166792	-0.128395	43782	608	0.013887	-0.362768	105467	-0.219372	0.476194	1.05769	36908	720	0.019508	-0.404431	29030	796	0.0274199	-1.51106	67454	-1.02891	0.00813171	0.294237
004_J20	SPAC11E3.04C	ubc13	22596	395	0.017481	-0.0606557	12089	224	0.0185292	0.0533026	35304	-0.0162066	0.76995	1.04045	11347	271	0.023883	-0.112512	10752	845	0.07859	0.00806448	23215	0.106281	0.503407	1.03645
004_J21	SPCC4F11.03C	SPCC4F11.03C	25306	634	0.0250533	0.458562	18596	402	0.0216176	0.275702	44938	0.386831	0.0125386	0.326831	21401	594	0.0277557	0.10429	23351	1729	0.0740439	-0.0779002	47075	0.145962	0.304946	1.01156
004_J23	SPCPB16A4.03C	ade10	12715	315	0.0247739	0.442379	6581	145	0.0220331	0.303173	19756	0.401498	0.0547637	0.674706	8488	237	0.0279218	0.112896	6160	729	0.118344	0.598635	15614	0.491317	0.111521	0.858359
004_J24	SPAC17A2.13C	rad25	20481	418	0.0204092	0.162776	6072	128	0.0210804	0.239399	27099	0.188192	0.246014	1.02365	11381	307	0.0269748	0.063117	3912	726	0.185583	1.24771	16326	0.525894	0.0861838	0.762097
004_K01	SPAPJ760.02C	abp1	14924	295	0.0197668	0.11664	6853	139	0.0202831	0.183776	22211	0.143056	0.408577	1.065	10585	295	0.0278696	0.110199	7626	672	0.0881196	0.173181	19178	0.178703	0.425626	1.0427
004_K02	SPCC5E4.05C	mgl1	1888	46	0.0243644	0.418334	7842	106	0.013517	-0.401731	9882	-0.208275	0.311955	1.04449	1279	31	0.0242377	-0.0912424	8140	580	0.0712531	-0.13333	10030	0.467524	0.204546	0.97562
004_K03	SPAC1805.10	SPAC1805.10	37743	704	0.0186525	0.0329254	6709	127	0.0189298	0.0841576	45283	0.050766	0.461779	1.05847	21641	620	0.0286493	0.150007	6101	645	0.10572	0.4359	29007	-0.041009	0.753109	1.01882
004_K04	SPAC1039.03	SPAC1039.03	4287	94	0.0219268	0.266251	10806	190	0.0175828	-0.0223344	15377	0.0601772	0.799921	1.034	3377	87	0.0257625	-0.00322111	8411	452	0.0537392	-0.540308	12327	-0.0370363	0.982191	1.0029
004_K05	SPAC26F1.09	gyp51	2690	75	0.027881	0.612843	2831	56	0.019781	0.147614	5652	0.394731	0.329642	1.04702	1720	48	0.027907	0.112132	3161	280	0.0885796	0.180692	5209	0.518445	0.301654	1.01454
004_K06	SPAC11H11.03C	SPAC11H11.03C	18788	297	0.015808	-0.20579	12973	191	0.0147229	-0.278441	32249	-0.232209	0.416137	1.06534	7058	162	0.0229527	-0.169832	8789	518	0.0589373	-0.407101	16527	-0.128678	0.875337	1.01122
004_K07	SPBC354.09C	SPBC354.09C	5381	118	0.021929	0.2664	19917	405	0.0203344	0.18742	25821	0.195953	0.243354	1.02338	2946	61	0.020706	-0.318443	19077	1597	0.0837134	0.0991763	23681	0.682358	0.0171867	0.474593
004_K08	SPAC1805.14	SPAC1805.14	16150	371	0.0229721	0.333444	1200	33	0.0275	0.62293	17754	0.367586	0.0923507	0.806854	8761	251	0.0286497	0.150026	1255	169	0.134661	0.784982	10436	-0.16192	0.660003	1.02653
004_K09	SPBC947.02	apl2	23753	531	0.0223551	0.294161	11225	197	0.0175501	-0.0250211	35706	0.205657	0.157007	0.948657	9550	219	0.0229319	-0.171136	6678	442	0.0661875	-0.239723	16889	-0.203838	0.715593	1.02395
004_K10	SPAC20G8.04C	SPAC20G8.04C	10138	195	0.0192346	0.0772601	35346	475	0.0134386	-0.410121	46154	-0.293032	0.284994	1.03676	9706	207	0.021327	-0.275812	26907	1000	0.037165	-1.07234	37820	-0.509005	0.298775	1.01571
004_K11	SPBC26H8.03	cho2	19575	359	0.0183397	0.00853057	26873	443	0.0164849	-0.115352	47250	-0.0638484	0.884193	1.02527	9930	218	0.0219537	-0.234032	22721	1528	0.0672506	-0.216736	34397	0.188852	0.28542	1.02803
004_K12	SPAC23C4.05C	SPAC23C4.05C	38742	743	0.0191782	0.0730228	41249	590	0.0143034	-0.320145	81324	-0.115067	0.949941	1.01254	16155	319	0.0197462	-0.386919	26104	716	0.0274287	-1.51059	43294	-0.937702	0.0190601	0.465125
004_K13	SPAC22H10.03C	kap114	23269	397	0.0170613	-0.0957112	20430	332	0.0162506	-0.136007	44428	-0.113516	0.894902	1.02117	10099	285	0.0282206	0.128255	19616	1251	0.0637745	-0.293303	31251	0.139912	0.375582	1.0175
004_K14	SPAC30C2.04	SPAC30C2.04	11693	227	0.0194133	0.0906062	7351	150	0.0204054	0.192449	19421	0.133394	0.482052	1.0573	5893	158	0.0268115	0.0543561	7471	660	0.0883416	0.176811	14182	0.383746	0.218124	0.985158
004_K15	SPAC22E12.19	snt1	42240	647	0.0153172	-0.251285	6775	131	0.0193358	0.114773	49793	-0.185287	0.624984	1.05865	25375	500	0.0197044	-0.389974	6241	588	0.0942157	0.269685	32704	-0.447051	0.37974	1.01479
004_K17	SPAC4D7.02C	SPAC4D7.02C	24056	434	0.0180412	-0.0151427	25951	412	0.0158761	-0.169647	50853	-0.0933065	0.994309	1.00034	11642	243	0.0208727	-0.306877	25055	1439	0.0574336	-0.444386	38379	-0.033559	0.673272	1.02687
004_K18	SPAC637.13C	slm1	34245	604	0.0176376	-0.0477858	19728	281	0.0142437	-0.326176	54858	-0.138395	0.824603	1.03288	11597	230	0.0198327	-0.380612	16607	563	0.0339014	-1.20494	28997	-0.738582	0.0745772	0.726839
004_K19	SPACUNK4.10	SPACUNK4.10	29523	506	0.0171392	-0.0891429	31376	474	0.0151071	-0.241276	61879	-0.165471	0.721983	1.05423	12500	232	0.01856	-0.476298	23471	950	0.0404755	-0.949234	37153	-0.513679	0.290785	1.02164
004_K20	SPAPB1A10.13	SPAPB1A10.13	32566	522	0.016029	-0.185758	24309	417	0.0171541	-0.0579444	57814	-0.128504	0.872899	1.02575	18048	389	0.0215536	-0.260563	32912	1590	0.0483106	-0.693941	52939	-0.272668	0.794341	1.01691
004_K21	SPBC359.01	SPBC359.01	34907	618	0.0177042	-0.0423505	10633	194	0.0182451	0.0310067	46352	-0.0174887	0.700321	1.05032	17902	399	0.022288	-0.212226	8710	853	0.0979334	0.325519	27864	0.00408308	0.662882	1.02593
004_K23	SPCC31H12.02C	mug73	8592	183	0.0212989	0.224337	8860	203	0.022912	0.3596	17838	0.293374	0.174049	0.975045	7805	206	0.0263933	0.0316795	10839	1344	0.123997	0.665948	20194	0.825482	0.00672075	0.274765
004_K24	SPBC16A3.19	eaf7	13999	317	0.0226445	0.312718	16699	303	0.0181448	0.0230548	31318	0.162289	0.261964	1.03798	8958	311	0.0347176	0.427172	13307	1887	0.141805	0.859555	24463	1.07334	0.000369673	0.050597
004_L01	SPBC18A7.02C	SPBC18A7.02C	10866	208	0.0191423	0.0703216	14169	227	0.0160209	-0.156547	25470	-0.0547652	0.977032	1.00279	11056	329	0.0297576	0.204764	11839	610	0.0515246	-0.60102	23834	-0.19391	0.834485	1.01781
004_L02	SPBC1539.02	SPBC1539.02	10704	181	0.0169096	-0.108601	2119	39	0.0184049	0.0435893	13043	-0.0730644	0.703017	1.05136	8886	180	0.0202566	-0.350103	2159	219	0.101436	0.376214	11444	-0.377007	0.317762	1.01761
004_L03	SPBC23G7.12C	rpt6	5793	120	0.0207147	0.184211	7464	146	0.0195606	0.131446	13523	0.152838	0.565202	1.063	4747	157	0.0330735	0.357182	7846	824	0.105022	0.426333	13574	0.731628	0.0286132	0.536157
004_L04	SPBC409.07C	wis1	13601	258	0.0189692	0.0572174	10933	162	0.0148175	-0.269197	24954	-0.0762273	0.889942	1.02217	8834	190	0.0215078	-0.263634	11359	776	0.0683159	-0.194061	21159	0.0281653	0.688874	1.02679
004_L05	SPBC2F12.03C	ebs1	3878	78	0.0201135	0.14172	3963	94	0.0237194	0.409567	8013	0.281465	0.438832	1.06796	2303	66	0.0286583	0.150457	3457	422	0.122071	0.643369	6248	0.852738	0.0449194	0.636965
004_L06	SPBC646.08C	SPBC646.08C	24116	379	0.0157157	-0.214234	18753	236	0.0125847	-0.504836	43484	-0.331182	0.202847	0.996542	10637	233	0.0219047	-0.237256	12248	436	0.0355976	-1.1345	23554	-0.682399	0.0972398	0.801337
004_L07	SPBC337.11	SPBC337.11	23593	417	0.0176747	-0.0447525	13051	229	0.0175465	-0.025314	37290	-0.033877	0.82264	1.03247	14037	346	0.0246491	-0.0669569	10330	618	0.0598258	-0.385515	25331	-0.245898	0.731538	1.02169
004_L08	SPAC6C3.04	cit1	21563	370	0.017159	-0.0874736	14174	272	0.0191901	0.103858	36379	-0.00667935	0.724484	1.05252	9209	170	0.0184602	-0.484076	8916	330	0.0370121	-1.07828	18625	-0.766056	0.0501665	0.672018
004_L09	SPBC428.14	SPBC428.14	63016	935	0.0148375	-0.297193	8406	154	0.0183202	0.0369377	72511	-0.243271	0.429546	1.06592	32724	636	0.0194353	-0.409817	6731	686	0.101917	0.383034	40777	-0.485561	0.339557	1.00747
004_L10	SPAC1039.09	isp5	50177	826	0.0164617	-0.147325	25699	467	0.0181719	0.0252091	77169	-0.0828274	0.902978	1.01605	15244	323	0.0211887	-0.285202	16620	829	0.0498797	-0.64783	33016	-0.375861	0.509118	1.03467
004_L11	SPBC776.15C	kgd2	18960	330	0.0174051	-0.0669339	20341	375	0.0184357	0.0459987	40006	-0.00877689	0.704926	1.05073	8647	188	0.0217416	-0.248033	12571	450	0.0357967	-1.12646	21856	-0.641735	0.119619	0.875725
004_L12	SPAC25H1.05	meu29	2496	43	0.0172276	-0.0817222	4542	73	0.0160722	-0.151933	7154	-0.130947	0.425166	1.06596	1376	45	0.0327035	0.34095	3203	368	0.114892	0.555928	4992	0.943035	0.0364972	0.577353
004_L13	SPBP8B7.10C	utp16	18320	253	0.01381	-0.400723	24580	331	0.0134662	-0.407155	43484	-0.406843	0.0952514	0.814155	10170	213	0.020944	-0.301961	19859	1142	0.0575054	-0.442584	31384	-0.0561381	0.768258	1.01831
004_L14	SPBC27.02C	ask1	26243	371	0.0141371	-0.366954	20437	270	0.0132113	-0.434725	47321	-0.394314	0.10882	0.855907	14626	296	0.0202379	-0.351432	15853	607	0.0382893	-1.02934	31382	-0.663092	0.12331	0.884236
004_L15	SPCC1259.11C	gyp2	20774	345	0.0166073	-0.134624	13298	250	0.0187998	0.0742175	34667	-0.0475311	0.898063	1.01705	9943	195	0.0196118	-0.396773	11317	789	0.0697181	-0.164748	22244	-0.0194859	0.778977	1.01921
004_L16	SPCC132.01C	mtr1	27698	461	0.0166438	-0.131456	16981	295	0.0173724	-0.0397077	45435	-0.0930448	0.984907	1.00206	12317	267	0.0216774	-0.252305	10679	370	0.0346474	-1.17353	23633	-0.760092	0.0590849	0.688886
004_L17	SPCC16A11.04	snx12	12077	187	0.015484	-0.235665	21574	356	0.0165013	-0.113918	34194	-0.161531	0.654757	1.0547	6810	212	0.0311307	0.269843	13752	589	0.0428301	-0.867656	21363	-0.268181	0.64154	1.01435
004_L18	SPCC4G3.08	psk1	29605	534	0.0180375	-0.0154421	3327	51	0.0153291	-0.220226	33517	-0.0228876	0.811732	1.03192	12095	243	0.0200909	-0.361949	2376	230	0.0968013	0.308745	14944	-0.521327	0.188297	0.981387
004_L19	SPCC1827.04	vms1	34918	526	0.0150639	-0.275349	24757	373	0.0150664	-0.245162	60574	-0.26064	0.377726	1.05616	11653	223	0.0191367	-0.432152	15412	717	0.0465222	-0.748363	28005	-0.43377	0.381372	1.01142
004_L20	SPAC11G7.01	SPAC11G7.01	35239	530	0.0150402	-0.277622	10981	205	0.0186686	0.0641132	46955	-0.182607	0.628385	1.05872	17141	322	0.0187854	-0.458885	12839	935	0.072825	-0.101848	31237	-0.16209	0.978332	1.00417
004_L21	SPCC4G3.10C	rhp42	51596	910	0.017637	-0.0478336	24619	453	0.0184004	0.0432376	77578	-0.0131954	0.602854	1.06283	23370	507	0.0216945	-0.251166	19162	1231	0.0642417	-0.282771	44270	-0.199195	0.954407	1.0045
004_L22	SPAC14C4.15C	SPAC14C4.15C	9725	150	0.0154242	-0.241249	10697	163	0.0152379	-0.228836	20735	-0.235796	0.348479	1.0548	7662	164	0.0214043	-0.270591	8184	804	0.0982405	0.330036	16814	0.380886	0.188284	0.982949
004_L23	SPCPB1C11.02	SPCPB1C11.02	38218	811	0.0212204	0.219009	19651	367	0.0186759	0.0646761	59047	0.173643	0.133245	0.89226	19921	435	0.0218363	-0.241769	12456	844	0.0677585	-0.20588	33656	-0.248028	0.789288	1.01623
004_L24	SPAC17A5.04C	mde10	3891	88	0.0226163	0.310922	6885	166	0.0241104	0.433153	11030	0.385173	0.164745	0.965809	2248	77	0.0342527	0.407722	3334	619	0.185663	1.24833	6278	1.41023	0.000531931	0.0669807
004_M01	SPAC13F5.01C	msh1	9869	232	0.023508	0.366708	7003	132	0.0188491	0.0779917	17236	0.257473	0.239175	1.0194	12529	448	0.035757	0.469733	9479	1026	0.108239	0.46987	23482	0.513634	0.0602556	0.69228
004_M03	SPAC18G6.10	lem2	7098	259	0.0364892	1.00103	23988	736	0.030682	0.780892	32081	0.826597	9.89572e-06	0.00115597	6919	408	0.0589681	1.19144	22694	3167	0.139552	0.836452	33188	1.36364	3.78053e-06	0.00119011
004_M04	SPAC1071.03C	sil1	8286	155	0.0187063	0.0370795	16210	255	0.015731	-0.182888	24906	-0.108756	0.769949	1.0409	5282	123	0.0232866	-0.148992	10387	545	0.0524694	-0.574805	16337	-0.138068	0.850466	1.01759
004_M05	SPBC25H2.16C	gga22	13009	237	0.0182182	-0.00106397	22191	395	0.0178	-0.0046233	35832	-0.00748499	0.732112	1.05245	7318	194	0.02651	0.038041	13118	1351	0.102988	0.398126	21981	0.688419	0.0183327	0.469199
004_M06	SPAC1296.01C	SPAC1296.01C	10860	198	0.018232	3.53644e-05	2610	55	0.0210728	0.238881	13723	0.0575534	0.853323	1.02803	5304	182	0.0343137	0.410291	2221	196	0.0882485	0.175291	7903	0.0986201	0.884908	1.01114
004_M07	SPAC3G6.09C	tps2	1940	35	0.0180412	-0.0151427	3296	69	0.0209345	0.229379	5340	0.138212	0.95091	1.01289	965	21	0.0217617	-0.246706	2796	387	0.138412	0.824615	4169	1.20938	0.0082613	0.292209
004_M08	SPAC1805.15C	pub2	12290	232	0.0188771	0.0501989	17680	335	0.018948	0.0855416	30537	0.0679955	0.518841	1.05849	7065	126	0.0178344	-0.533832	14200	1098	0.0773239	-0.0153666	22489	0.295048	0.225443	0.989812
004_M09	SPCC162.02C	SPCC162.02C	13210	220	0.016654	-0.130568	11822	190	0.0160717	-0.151976	25442	-0.139984	0.665363	1.05508	6454	191	0.0295941	0.196813	13816	1478	0.106977	0.452953	21939	0.811563	0.00652788	0.270392
004_M10	SPAC20G8.10C	atg6	13937	192	0.0137763	-0.404255	27652	404	0.0146102	-0.28953	42185	-0.332724	0.19932	1.00104	7928	168	0.0211907	-0.285062	30969	1700	0.0548936	-0.509644	40765	0.033761	0.519474	1.03566
004_M11	SPBC1652.02	SPBC1652.02	44948	847	0.018844	0.0476641	26010	481	0.0184929	0.0504692	72286	0.0523838	0.376745	1.06	20334	462	0.0227206	-0.184496	21381	1473	0.0688929	-0.181926	43650	-0.0163072	0.612905	1.03068
004_M12	SPAC23D3.10C	eng2	19461	353	0.0181388	-0.00735862	19627	280	0.0142661	-0.323914	39721	-0.156354	0.702377	1.0509	8599	213	0.0247703	-0.0598817	16194	737	0.0455107	-0.780077	25743	-0.292008	0.63455	1.01761
004_M13	SPAC1039.06	SPAC1039.06	21372	321	0.0150197	-0.27959	12907	190	0.0147207	-0.278656	34790	-0.275836	0.309666	1.05133	11512	246	0.021369	-0.272975	7634	385	0.0504323	-0.631934	19777	-0.509406	0.231708	0.991054
004_M14	SPAC30D11.10	rad52	2675	76	0.0284112	0.64002	1987	58	0.0291897	0.70896	4796	0.671378	0.070469	0.731116	1112	42	0.0377698	0.548738	1334	244	0.182909	1.22677	2732	1.31752	0.00876234	0.303119
004_M15	SPAC24H6.09	gef1	20979	334	0.0159207	-0.195539	22921	469	0.0204616	0.196417	44703	0.0193449	0.571339	1.06501	13878	348	0.0250757	-0.0422067	27730	2239	0.0807429	0.0470532	44195	0.406345	0.0692217	0.714459
004_M16	SPAC4G8.13C	prz1	3903	76	0.0194722	0.094975	29217	493	0.0168737	-0.0817217	33689	-0.0711081	0.999799	0.999799	2110	74	0.0350711	0.441788	26254	1385	0.0527539	-0.567005	29823	0.132844	0.396622	1.02425
004_M17	SPAC4G8.06C	trm12	11937	230	0.0192678	0.0797526	25956	407	0.0156804	-0.187541	38530	-0.102472	0.908962	1.0159	9110	249	0.0273326	0.0821285	24662	1259	0.0510502	-0.614365	35280	-0.0712657	0.776763	1.0197
004_M18	SPAC6G10.03C	SPAC6G10.03C	10503	189	0.0179949	-0.0188562	37004	550	0.0148633	-0.264751	48246	-0.2144	0.516773	1.06044	7419	165	0.0222402	-0.215325	32081	1044	0.0325426	-1.26395	40709	-0.616113	0.174689	0.956383
004_M19	SPAP8A3.12C	tpp2	43788	715	0.0163287	-0.159033	9282	155	0.016699	-0.0967407	53940	-0.138715	0.82118	1.03228	26419	631	0.0238843	-0.11243	6443	283	0.0439236	-0.831284	33776	-0.754229	0.071019	0.72352
004_M20	SPAPB1E7.04C	SPAPB1E7.04C	1813	32	0.0176503	-0.046748	3478	99	0.0284646	0.672669	5422	0.45612	0.245333	1.02488	1486	48	0.0323015	0.323106	3217	346	0.107554	0.460702	5097	0.83654	0.0667836	0.707862
004_M21	SPBC365.12C	ish1	18833	409	0.0217172	0.252397	22666	423	0.0186623	0.0636266	42331	0.151673	0.217615	0.999066	10324	268	0.0259589	0.00773662	20526	1722	0.0838936	0.102279	32840	0.459423	0.0610635	0.693964
004_M22	SPBC1289.16C	cao2	15123	332	0.0219533	0.267998	17453	314	0.0179912	0.0107882	33222	0.135891	0.305588	1.05106	9882	211	0.021352	-0.274126	27792	1865	0.0671056	-0.219848	39750	0.232163	0.212187	0.985198
004_M23	SPCC4B3.03C	SPCC4B3.03C	10250	177	0.0172683	-0.0783155	15506	317	0.0204437	0.195155	26250	0.0877684	0.507921	1.05602	9451	298	0.0315311	0.288279	20443	1856	0.090789	0.216236	32048	0.619088	0.0189537	0.469812
004_M24	SPBC16G5.07C	SPBC16G5.07C	11851	291	0.0245549	0.429569	1704	52	0.0305164	0.773085	13898	0.487549	0.0459998	0.617375	10014	374	0.0373477	0.532526	1249	197	0.157726	1.01307	11834	0.111897	0.708199	1.02407
004_N01	SPBC18E5.11C	edc3	10927	251	0.0229706	0.333349	10561	180	0.0170438	-0.0672508	21919	0.152323	0.38917	1.05632	10865	330	0.0303728	0.234284	7517	352	0.0468272	-0.738935	19064	-0.338525	0.477718	1.04362
004_N02	SPBC17D1.05	SPBC17D1.05	9637	148	0.0153575	-0.2475	10100	130	0.0128713	-0.472345	20015	-0.357652	0.134402	0.890555	7464	193	0.0258574	0.00208562	7933	756	0.0952981	0.286166	16346	0.393756	0.181065	0.972682
004_N03	SPBC24C6.04	SPBC24C6.04	8011	181	0.0225939	0.309494	10759	211	0.0196115	0.135198	19162	0.210591	0.297985	1.03965	6632	222	0.0334741	0.374549	11134	1101	0.0988863	0.339489	19089	0.66662	0.0268738	0.528743
004_N04	SPAC343.16	lys2	3066	62	0.0202218	0.14947	3804	64	0.0168244	-0.0859466	6996	0.0232076	0.808184	1.03074	1582	41	0.0259166	0.00537998	3453	332	0.0961483	0.298979	5408	0.659109	0.157199	0.933705
004_N05	SPBC2G2.01C	liz1	11209	217	0.0193594	0.0865965	11062	206	0.0186223	0.0605308	22694	0.0736572	0.604486	1.06392	7750	217	0.028	0.116932	12969	1127	0.0868995	0.153067	22063	0.467504	0.0871296	0.768303
004_N06	SPCC417.12	SPCC417.12	11286	190	0.016835	-0.114976	2274	48	0.0211082	0.241301	13798	-0.0402297	0.824255	1.03286	7087	166	0.0234232	-0.140558	2022	179	0.0885262	0.179823	9454	-0.308771	0.378682	1.01368
004_N07	SPBC354.05C	sre2	21673	394	0.0181793	-0.0041442	17242	306	0.0177474	-0.00889675	39615	-0.00480556	0.69257	1.05576	16525	408	0.0246899	-0.0645755	16776	939	0.0559728	-0.481555	34648	-0.21389	0.87606	1.01131
004_N08	SPAC977.12	SPAC977.12	12491	196	0.0156913	-0.216476	12650	237	0.0187352	0.0692484	25574	-0.0675091	0.930282	1.01421	12488	291	0.0233024	-0.148018	11323	540	0.0476905	-0.712579	24642	-0.426782	0.373943	1.01568
004_N09	SPBC4C3.06	syp1	17468	247	0.0141401	-0.366644	13391	257	0.019192	0.104003	31363	-0.144102	0.699796	1.05103	13366	349	0.026111	0.0161649	12968	1087	0.0838217	0.101042	27770	0.217055	0.283264	1.03088
004_N10	SPAC25A8.02	atg14	10581	209	0.0197524	0.115586	19617	304	0.0154968	-0.204534	30711	-0.0873283	0.909532	1.01474	9558	220	0.0230174	-0.165771	16488	634	0.0384522	-1.02322	26900	-0.516828	0.256703	1.0051
004_N11	SPBC800.11	SPBC800.11	22121	330	0.014918	-0.289392	9041	132	0.0146002	-0.290518	31624	-0.283729	0.283968	1.03542	14191	281	0.0198013	-0.3829	6053	406	0.0670742	-0.220524	20931	-0.467187	0.291072	1.02037
004_N12	SPAC26H5.08C	bgl2	9717	145	0.0149223	-0.288971	14018	228	0.0162648	-0.134748	24108	-0.199675	0.465329	1.05662	9008	184	0.0204263	-0.338067	13357	578	0.0432732	-0.852808	23127	-0.461454	0.312576	1.01338
004_N14	SPBC337.07C	ecm14	16822	328	0.0194983	0.0969056	22240	393	0.0176709	-0.0151287	39783	0.0323993	0.556428	1.05977	11875	304	0.0256	-0.0123505	29262	2569	0.087793	0.167825	44010	0.574047	0.0195593	0.462953
004_N15	SPCC126.04C	sgf73	10878	217	0.0199485	0.129841	11618	252	0.0216905	0.280561	22965	0.208085	0.250977	1.0307	9349	245	0.026206	0.0214035	10757	843	0.0783676	0.00397503	21194	0.205978	0.356167	1.00288
004_N16	SPCC16C4.14C	sfc4	26298	433	0.0164651	-0.147027	8726	110	0.012606	-0.50239	35567	-0.219226	0.467113	1.05611	15667	312	0.0199145	-0.374677	7849	487	0.0620461	-0.332941	24315	-0.46545	0.313643	1.0137
004_N17	SPCC16C4.06C	pus3	12968	212	0.0163479	-0.157333	8742	174	0.0199039	0.156551	22096	-0.021593	0.948084	1.0133	8722	243	0.0278606	0.109731	10040	845	0.0841633	0.10691	19850	0.30579	0.236614	0.98657
004_N18	SPCC285.05	SPCC285.05	14035	221	0.0157463	-0.211424	16144	254	0.0157334	-0.182671	30654	-0.197452	0.513061	1.06042	10638	226	0.0212446	-0.281399	18910	799	0.0422528	-0.887236	30573	-0.435511	0.390412	1.01656
004_N19	SPCC1840.03	sal3	23648	423	0.0178873	-0.0275015	3750	86	0.0229333	0.360945	27907	0.041761	0.63611	1.05317	13571	300	0.022106	-0.224059	4250	349	0.0821176	0.0714105	18470	-0.365362	0.424514	1.04322
004_N20	SPAC1296.03C	sxa2	13800	263	0.019058	0.0639536	10136	177	0.0174625	-0.0322403	24376	0.0264873	0.737988	1.05084	9292	238	0.0256134	-0.0115938	6280	374	0.0595541	-0.39208	16184	-0.255425	0.59699	1.03487
004_N21	SPCC553.01C	dbl2	15931	350	0.0219697	0.269077	3965	97	0.0244641	0.454163	20343	0.315962	0.11937	0.867492	10945	298	0.027227	0.076546	3593	305	0.0848873	0.119267	15141	-0.177673	0.739616	1.02209
004_N22	SPAC15A10.03C	rad54	6177	175	0.0283309	0.635936	2408	51	0.0211794	0.246161	8811	0.544599	0.0664199	0.719892	6065	199	0.0328112	0.345695	2510	301	0.11992	0.617722	9075	0.313717	0.427451	1.04392
004_N23	SPAC3A11.07	nde2	13623	325	0.0238567	0.387954	2575	55	0.0213592	0.258358	16578	0.37835	0.0937619	0.807992	11493	523	0.045506	0.817561	2362	401	0.169771	1.11924	14779	0.507484	0.108291	0.848011
004_N24	SPAC17H9.19C	cdt2	6677	187	0.0280066	0.619325	3922	112	0.0285569	0.677336	10898	0.644383	0.0157539	0.373593	7631	349	0.0457345	0.824789	3784	916	0.242072	1.63108	12680	1.24013	0.000356702	0.0510409
004_O01	SPAC1556.01C	rad50	9893	237	0.0239563	0.393966	4048	105	0.0259387	0.538607	14283	0.442828	0.0671721	0.723074	9999	388	0.0388039	0.587707	14861	1840	0.123814	0.663821	27088	0.933848	0.0013411	0.120622
004_O02	SPCPJ732.02C	xks1	1461	26	0.017796	-0.0348855	9311	179	0.0192246	0.10645	10977	0.0765037	0.878955	1.02447	1158	38	0.0328152	0.34587	12467	1189	0.0953718	0.287281	14852	0.940804	0.00449297	0.231867
004_O07	SPBC19C2.09	sre1	7419	172	0.0231837	0.346671	12510	233	0.0186251	0.0607469	20334	0.171218	0.367401	1.05922	7766	172	0.0221478	-0.221329	23626	1949	0.0824939	0.078005	33513	0.526273	0.0371131	0.58416
004_O09	SPCC1840.05C	SPCC1840.05C	16071	293	0.0182316	0	18513	324	0.0175012	-0.0290462	35201	-0.0166684	0.772616	1.03916	13650	335	0.0245421	-0.0732342	16884	958	0.0567401	-0.461913	31827	-0.147769	0.982738	1.00183
004_O10	SPAC20H4.04	fml2	9091	168	0.0184798	0.0195094	20027	346	0.0172767	-0.0476756	29632	-0.031977	0.886241	1.02351	8346	195	0.0233645	-0.144177	16329	888	0.0543818	-0.523159	25758	-0.0960914	0.913489	1.01113
004_O11	SPAC10F6.14C	SPAC10F6.14C	12051	233	0.0193345	0.0847361	22215	395	0.0177808	-0.00618276	34894	0.0221526	0.631001	1.05524	12123	381	0.0314279	0.28355	21035	1265	0.0601379	-0.378008	34804	0.0815328	0.456118	1.04884
004_O12	SPAC23E2.03C	ste7	11189	222	0.0198409	0.122038	24347	438	0.0179899	0.0106856	36196	0.0413506	0.553091	1.05917	10192	317	0.0311028	0.268551	29133	1093	0.0375176	-1.05871	40735	-0.387826	0.512958	1.03645
004_O14	SPAC30D11.11	SPAC30D11.11	9608	170	0.0176936	-0.0432143	6729	127	0.0188735	0.0798632	16634	0.0104857	0.938184	1.01233	5613	185	0.0329592	0.352187	7143	651	0.0911382	0.221774	13592	0.482324	0.137211	0.911267
004_O15	SPAC29B12.10C	pgt1	4906	130	0.0264982	0.539452	1967	59	0.0299949	0.748217	7062	0.60754	0.0589764	0.704589	3479	144	0.0413912	0.68083	1786	208	0.116461	0.575498	5617	0.511067	0.29149	1.0207
004_O16	SPAC4G9.09C	arg11	10484	222	0.0211751	0.215929	3776	74	0.0195975	0.134165	14556	0.201789	0.409161	1.06126	5827	188	0.0322636	0.321413	3122	333	0.106662	0.448698	9470	0.311482	0.417776	1.03965
004_O17	SPAC56F8.12	SPAC56F8.12	15853	341	0.0215101	0.238575	34204	560	0.0163724	-0.125239	50958	-0.00387885	0.626305	1.05804	10838	292	0.0269422	0.0613755	31390	1139	0.0362854	-1.10689	43659	-0.469251	0.370772	1.01055
004_O18	SPAC7D4.03C	SPAC7D4.03C	2074	54	0.0260366	0.514103	3088	70	0.0226684	0.344181	5286	0.412504	0.318944	1.04786	1567	47	0.0299936	0.216161	4705	588	0.124973	0.677268	6907	1.10976	0.00596724	0.260901
004_O19	SPAPB2C8.01	SPAPB2C8.01	10105	215	0.0212766	0.222826	21016	395	0.0187952	0.0738633	31731	0.119087	0.359532	1.06077	10272	255	0.0248248	-0.0567142	21310	1772	0.0831534	0.0894943	33609	0.452169	0.0628144	0.701205
004_O20	SPAPYUG7.02C	sin1	5847	137	0.0234308	0.361966	5397	90	0.0166759	-0.098734	11471	0.161703	0.604868	1.064	2425	45	0.0185567	-0.476554	3480	359	0.103161	0.400543	6309	0.544344	0.227758	0.990307
004_O21	SPBP8B7.09C	los1	15465	350	0.0226317	0.311907	2832	65	0.022952	0.362117	18712	0.32967	0.119747	0.868234	10201	254	0.0248995	-0.0523764	4478	493	0.110094	0.494379	15426	0.117352	0.605063	1.03462
004_O22	SPBC12C2.08	dnm1	9676	199	0.0205663	0.173845	11156	237	0.0212442	0.250566	21268	0.213693	0.261268	1.03914	7589	225	0.0296482	0.199449	11135	1107	0.0994163	0.3472	20056	0.600631	0.040409	0.600036
004_P01	SPBC1921.03C	mex67	10157	228	0.0224476	0.300119	10479	200	0.0190858	0.0959977	21064	0.200613	0.290341	1.04061	10838	328	0.0302639	0.229103	9501	988	0.103989	0.412078	21655	0.463836	0.0909683	0.78457
004_P02	SPBC18E5.01	SPBC18E5.01	6153	103	0.0167398	-0.123159	6263	126	0.0201182	0.171997	12645	0.031313	0.970889	1.00432	6034	176	0.029168	0.175894	4766	622	0.130508	0.739782	11598	0.655355	0.0607936	0.693399
004_P07	SPBC354.08C	SPBC354.08C	11521	248	0.0215259	0.239633	3258	63	0.019337	0.114864	15090	0.221532	0.35116	1.05683	6735	225	0.0334076	0.371681	2539	396	0.155967	0.996886	9895	0.513327	0.165685	0.951784
004_P08	SPBC342.03	gas4	15968	274	0.0171593	-0.0874487	8308	146	0.0175734	-0.023106	24696	-0.0609755	0.943647	1.01337	16142	444	0.0275059	0.091246	10744	1242	0.115599	0.56478	28572	0.418675	0.0910145	0.780692
004_P09	SPBC530.05	prt1	1062	19	0.0178908	-0.0272253	949	19	0.0200211	0.165018	2049	0.0662522	0.691876	1.05623	602	24	0.0398671	0.626705	501	40	0.0798403	0.0308357	1167	0.306636	0.992135	1.00168
004_P10	SPAC343.15	tit1	21857	408	0.0186668	0.0340328	14391	256	0.0177889	-0.0055243	36912	0.0214477	0.616446	1.06128	11959	350	0.0292667	0.180764	8824	463	0.0524705	-0.574774	21596	-0.262151	0.656957	1.02483
004_P11	SPBC839.06	cta3	23227	463	0.0199337	0.128768	19994	372	0.0186056	0.0592342	44056	0.0982096	0.330473	1.04545	12925	439	0.0339652	0.395562	14180	805	0.0567701	-0.461151	28349	-0.0316471	0.737758	1.02221
004_P12	SPAC824.09C	SPAC824.09C	6526	117	0.0179283	-0.0242033	1619	21	0.012971	-0.461215	8283	-0.0911525	0.542202	1.06218	4575	136	0.0297268	0.203269	1118	187	0.167263	1.09776	6016	0.274271	0.633189	1.01906
004_P13	SPBPB7E8.01	SPBPB7E8.01	8329	157	0.0188498	0.0481084	4240	84	0.0198113	0.149824	12810	0.0873292	0.78433	1.03853	4858	132	0.0271717	0.0736092	3363	458	0.136188	0.801245	8811	0.613327	0.112234	0.857554
004_P14	SPBC3B8.02	php5	27529	658	0.0239021	0.390694	15008	386	0.0257196	0.526368	43581	0.443497	0.00558957	0.198084	13496	466	0.0345287	0.419304	11167	1086	0.0972508	0.315429	26215	0.423706	0.0957538	0.793245
004_P15	SPCC126.09	zip2	7622	194	0.0254526	0.481374	10103	188	0.0186083	0.0594476	18107	0.255953	0.228391	1.00889	3834	126	0.0328638	0.348007	11535	1096	0.0950152	0.281876	16591	0.761146	0.0163536	0.459652
004_P16	SPCC24B10.15	SPCC24B10.15	22345	454	0.0203177	0.156299	20883	359	0.017191	-0.0548464	44041	0.0594551	0.441107	1.06773	13722	452	0.0329398	0.351338	15745	888	0.0563989	-0.470616	30807	-0.0449417	0.747014	1.01978
004_P17	SPCC1739.10	mug33	20213	405	0.0200366	0.136197	14126	270	0.0191137	0.0981051	35014	0.123205	0.322487	1.05075	16067	432	0.0268874	0.0584364	13411	1213	0.0904481	0.210809	31123	0.250374	0.223047	0.993141
004_P19	SPCC188.09C	pfl4	11447	231	0.02018	0.146482	2797	65	0.0232392	0.380058	14540	0.203409	0.40567	1.06624	8954	235	0.0262453	0.0235622	2484	307	0.123591	0.66122	11980	0.0144554	0.913563	1.01086
004_P20	SPAC12G12.09	SPAC12G12.09	12161	258	0.0212154	0.218668	4128	99	0.0239826	0.425484	16646	0.280192	0.210616	1.00042	8371	201	0.0240115	-0.104771	4256	477	0.112077	0.520137	13305	0.194771	0.506535	1.03476
004_P21	SPCC584.01C	SPCC584.01C	14647	357	0.0243736	0.418878	12237	275	0.0224728	0.33168	27516	0.381343	0.0359585	0.572794	6733	168	0.0249517	-0.0493545	9495	1163	0.122486	0.648257	17559	0.805951	0.0102906	0.327221
004_P22	SPAC15E1.05C	ect1	20855	497	0.0238312	0.386412	8628	188	0.0217895	0.287133	30168	0.364387	0.0368405	0.578085	19804	579	0.0292365	0.179277	8488	1340	0.15787	1.01438	30211	0.531886	0.0397885	0.602184
005_A01	SPAC186.01	pfl9	9703	229	0.0236009	0.309831	10760	278	0.0258364	0.364606	20970	0.329311	0.100782	0.834296	6996	350	0.0500286	0.941975	6361	139	0.0218519	0.243803	13846	0.708505	0.0326659	0.54698
005_A02	SPAC1F8.06	fta5	10842	252	0.0232429	0.287779	7428	167	0.0224825	0.164002	18689	0.217817	0.290703	1.03602	8567	404	0.0471577	0.856716	3988	124	0.0310933	0.752646	13083	0.908542	0.00775841	0.287335
005_A03	SPAC23C11.04C	pnk1	8353	238	0.0284928	0.581582	11000	324	0.0294545	0.55369	19915	0.558356	0.00841181	0.257581	6909	373	0.0539876	1.05185	6233	312	0.0500562	1.43959	13827	1.21819	0.000349487	0.0523898
005_A04	SPAC57A7.08	pzh1	2585	67	0.0259188	0.444983	8582	259	0.0301794	0.588766	11493	0.565974	0.0315988	0.541645	1996	112	0.0561122	1.10754	6021	263	0.0436805	1.24303	8392	1.06202	0.00567476	0.258901
005_A05	SPAC29A4.20	elp3	4547	135	0.0296899	0.640959	3642	79	0.0216914	0.112321	8403	0.406195	0.202722	0.99904	3348	196	0.0585424	1.1687	1435	41	0.0285714	0.630616	5020	1.14517	0.00905313	0.306444
005_A06	SPAC3H1.07	aru1	9966	196	0.0196669	0.0467538	9282	200	0.0215471	0.102692	19644	0.0611351	0.700547	1.04966	6080	133	0.021875	-0.251494	6545	81	0.0123759	-0.576428	12839	-0.402406	0.303191	1.01429
005_A07	SPAC3F10.05C	mug113	15824	354	0.0223711	0.232622	6391	150	0.0234705	0.226048	22719	0.202233	0.265345	1.04092	11717	397	0.0338824	0.379758	3509	123	0.0350527	0.92557	15746	0.608241	0.0535425	0.676915
005_A08	SPBC36B7.05C	SPBC36B7.05C	5531	118	0.0213343	0.164161	6783	165	0.0243255	0.27767	12597	0.220846	0.415626	1.06489	4505	97	0.0215316	-0.27432	5166	119	0.0230352	0.319885	9887	-0.00443916	0.975195	1.00455
005_A09	SPAC6G10.12C	ace2	2903	69	0.0237685	0.320038	2186	39	0.0178408	-0.16962	5197	0.10592	0.952911	1.01263	1783	103	0.0577678	1.14949	932	73	0.0783262	2.08554	2891	1.53282	0.00150991	0.132033
005_A10	SPCC1393.09C	SPCC1393.09C	11257	247	0.0219419	0.204675	17151	327	0.0190659	-0.0738027	28982	0.0350967	0.646093	1.05148	7582	216	0.0284885	0.129603	13223	198	0.0149739	-0.301506	21219	-0.171033	0.854913	1.01557
005_A11	SPBC11B10.05C	rsp1	20474	393	0.0191951	0.0117229	13331	277	0.0207786	0.0503003	34475	0.00726769	0.688795	1.05716	18373	444	0.0241659	-0.107805	11614	316	0.0272085	0.560103	30747	0.177929	0.31974	1.01058
005_A13	SPBC1711.09C	SPBC1711.09C	15157	310	0.0204526	0.103271	15893	335	0.0210785	0.070969	31695	0.0750491	0.484896	1.05692	11423	326	0.0285389	0.132153	10393	252	0.0242471	0.393855	22394	0.241949	0.292013	1.0214
005_A14	SPBC4F6.16C	ero11	8204	169	0.0205997	0.11361	4116	112	0.0272109	0.439383	12601	0.209911	0.441734	1.06679	5308	140	0.0263753	0.0184091	8246	156	0.0189183	0.0358228	13850	-0.036855	0.976242	1.00432
005_A15	SPBC36B7.02	SPBC36B7.02	153	3	0.0196078	0.0424174	11445	265	0.0231542	0.206474	11866	0.2287	0.418702	1.06327	8969	244	0.0272048	0.0630846	8175	152	0.0185933	0.0108238	17540	0.0440632	0.714515	1.0238
005_A16	SPAC227.01C	erd1	16155	351	0.021727	0.190477	16291	355	0.0217912	0.118943	33152	0.141971	0.292065	1.03386	13560	591	0.0435841	0.743023	13052	213	0.0163193	-0.177374	27416	0.431385	0.0873561	0.768148
005_A17	SPBC651.05C	dot2	15010	343	0.0228514	0.263271	13977	334	0.0238964	0.251993	29664	0.244093	0.13663	0.892198	9923	273	0.0275118	0.0792752	13104	238	0.0181624	-0.0230025	23538	-0.0137367	0.749106	1.01909
005_A18	SPAP8A3.03	SPAP8A3.03	23951	448	0.0187049	-0.0256006	20781	393	0.0189115	-0.0855364	45573	-0.0688582	0.913111	1.01335	21304	469	0.0220146	-0.242314	18082	282	0.0155956	-0.242816	40137	-0.232603	0.857719	1.01431
005_A19	SPCC1672.03C	SPCC1672.03C	19494	428	0.0219555	0.205567	20090	445	0.0221503	0.142527	40457	0.161407	0.207696	0.998586	16401	343	0.0209134	-0.316353	16165	255	0.0157748	-0.226333	33164	-0.286955	0.697115	1.02548
005_A20	SPBC646.02	cwf11	16484	409	0.0248119	0.382021	25556	557	0.0217953	0.119215	43006	0.220604	0.109627	0.855853	15916	445	0.0279593	0.10255	31872	632	0.0198293	0.103678	48865	0.00856446	0.544502	1.04074
005_A21	SPCC31H12.05C	sds21	34300	919	0.026793	0.492843	31045	836	0.0269287	0.424341	67100	0.445666	0.00213678	0.0949212	37781	938	0.0248273	-0.0688504	32244	507	0.0157239	-0.231002	71470	-0.118606	0.810183	1.02141
005_A22	SPCC61.03	SPCC61.03	17276	309	0.0178861	-0.0901758	28655	581	0.0202757	0.0149506	46821	-0.0253196	0.728784	1.05391	19810	491	0.0247855	-0.0712833	37510	595	0.0158624	-0.218342	58406	-0.24182	0.876257	1.01117
005_A23	SPCC794.01C	zwf2	129	3	0.0232558	0.288578	14726	362	0.0245824	0.292823	15220	0.317291	0.177903	0.980955	34483	878	0.0254618	-0.0324418	18816	363	0.0192921	0.0640527	54540	0.0555893	0.440617	1.0532
005_A24	SPAC13F5.03C	gld1	28365	653	0.0230213	0.273958	24358	669	0.0274653	0.45281	54045	0.346561	0.0163696	0.382443	30997	1077	0.0347453	0.41604	24162	736	0.0304611	0.723009	56972	0.552977	0.0192743	0.463172
005_B01	SPAC18B11.02C	SPAC18B11.02C	14080	343	0.0243608	0.355548	10249	266	0.0259538	0.371142	24938	0.344108	0.0653426	0.715592	10619	328	0.030888	0.24627	7058	152	0.0215358	0.222783	18157	0.277427	0.290605	1.02559
005_B02	SPCC306.05C	ins1	9647	215	0.0222867	0.227171	8894	212	0.0238363	0.248359	18968	0.22386	0.274224	1.03457	7639	266	0.0348213	0.419193	6673	121	0.0181328	-0.0253572	14699	0.271375	0.351425	1.00116
005_B03	SPAC1D4.06C	csk1	10457	199	0.0190303	-0.000713993	9448	234	0.0247671	0.303627	20338	0.141579	0.442966	1.06406	7922	251	0.0316839	0.282973	6371	117	0.0183645	-0.00704005	14661	0.200664	0.465637	1.04553
005_B04	SPCC594.02C	SPCC594.02C	4016	78	0.0194223	0.0287014	3351	79	0.0235751	0.23246	7524	0.111959	0.91108	1.01431	2795	97	0.0347048	0.414359	2238	46	0.0205541	0.155467	5176	0.342791	0.56166	1.03519
005_B05	SPAC24B11.13	hem3	11083	223	0.0201209	0.0796819	10472	204	0.0194805	-0.0427685	21982	0.00655674	0.847511	1.0281	6995	188	0.0268763	0.0455592	6724	92	0.0136823	-0.431643	13999	-0.134482	0.809017	1.02158
005_B06	SPCC736.13	SPCC736.13	12725	235	0.0184676	-0.0440183	4705	70	0.0148778	-0.43164	17735	-0.17242	0.484906	1.05621	11278	267	0.0236744	-0.137449	3657	75	0.0205086	0.152273	15277	0.0315656	0.788784	1.01724
005_B07	SPAC3C7.09	set8	11339	244	0.0215187	0.176574	11518	268	0.0232679	0.213542	23369	0.183851	0.295309	1.0372	11228	289	0.0257392	-0.0168089	10245	186	0.0181552	-0.0235742	21948	-0.0183297	0.780456	1.01945
005_B08	SPAC23H4.09	cdb4	8424	162	0.0192308	0.0144031	9084	203	0.022347	0.155279	17873	0.0802254	0.674804	1.06204	6986	162	0.0231892	-0.167322	7306	137	0.0187517	0.0230654	14591	-0.0987958	0.901948	1.0126
005_B09	SPAC589.07C	atg1801	11858	241	0.0203238	0.094159	11600	220	0.0189655	-0.0814219	23919	-0.00497003	0.858569	1.02573	7668	251	0.0327334	0.329988	6784	92	0.0135613	-0.444459	14795	0.0832059	0.689038	1.02655
005_B10	SPAC31A2.11C	cuf1	22981	415	0.0180584	-0.0763436	12644	229	0.0181114	-0.147906	36269	-0.125486	0.80316	1.03268	16015	333	0.020793	-0.324679	8060	191	0.0236973	0.360764	24599	-0.0417025	0.79971	1.02005
005_B11	SPAC890.05	SPAC890.05	7776	171	0.0219907	0.207883	12564	240	0.0191022	-0.0710621	20751	0.035162	0.767907	1.04306	6224	232	0.0372751	0.517433	9150	150	0.0163934	-0.170838	15756	0.149347	0.536145	1.038
005_B12	SPBC2D10.11C	nap2	16397	364	0.0221992	0.221493	12035	256	0.0212713	0.084107	29052	0.145096	0.320148	1.04637	16014	325	0.0202947	-0.359671	14243	276	0.0193779	0.0704584	30858	-0.173637	0.947667	1.0048
005_B13	SPBC119.16C	SPBC119.16C	7854	156	0.0198625	0.0610331	12495	263	0.0210484	0.0689112	20768	0.0623356	0.675112	1.062	4444	111	0.0249775	-0.0601485	7483	147	0.0196445	0.0901706	12185	-0.0505936	0.947911	1.00438
005_B14	SPBC16A3.14	SPBC16A3.14	7033	130	0.0184843	-0.0427139	9005	166	0.0184342	-0.122416	16334	-0.0955538	0.695909	1.05422	5479	112	0.0204417	-0.349263	6328	136	0.0214918	0.219828	12055	-0.0930358	0.850516	1.01726
005_B15	SPBC16E9.02C	SPBC16E9.02C	15749	338	0.0214617	0.17275	6457	151	0.0233855	0.220812	22695	0.159228	0.360668	1.05818	11262	338	0.0300124	0.204783	4167	112	0.0268778	0.542461	15879	0.380547	0.199146	0.974981
005_B16	SPAC27D7.03C	mei2	23313	429	0.0184018	-0.0491704	18606	402	0.0216059	0.106627	42750	0.00758741	0.625456	1.05888	17921	388	0.0216506	-0.266372	14181	229	0.0161484	-0.192569	32719	-0.221126	0.847009	1.01848
005_B17	SPBC20F10.07	SPBC20F10.07	19096	342	0.0179095	-0.0882876	7786	160	0.0205497	0.034317	27384	-0.0786099	0.909412	1.01496	16465	332	0.020164	-0.368997	6956	127	0.0182576	-0.0154582	23880	-0.193042	0.83701	1.01891
005_B18	SPCC16A11.03C	SPCC16A11.03C	11178	210	0.0187869	-0.0192862	14209	276	0.0194243	-0.0469374	25873	-0.0427904	0.972494	1.00434	7762	191	0.0246071	-0.0817052	10477	151	0.0144125	-0.356634	18581	-0.256764	0.63014	1.01989
005_B20	SPAC1002.06C	bqt2	17692	334	0.0188786	-0.0122625	16868	439	0.0260256	0.375131	35333	0.181708	0.19759	0.998718	21937	438	0.0199663	-0.383213	20919	357	0.0170658	-0.112847	43651	-0.272276	0.775036	1.02084
005_B21	SPBC800.05C	atb2	26644	533	0.0200045	0.0713114	20743	467	0.0225136	0.165997	48387	0.09778	0.312	1.04353	26199	659	0.0251536	-0.0500107	21076	404	0.0191687	0.0547974	48338	0.00525874	0.552702	1.03627
005_B22	SPAC1565.04C	ste4	23321	430	0.0184383	-0.0463064	14253	331	0.0232232	0.210765	38335	0.038505	0.545984	1.06102	24407	560	0.0229442	-0.182646	17425	292	0.0167575	-0.139147	42684	-0.137487	0.899253	1.01391
005_B23	SPBP4G3.03	SPBP4G3.03	23153	530	0.0228912	0.26578	19691	450	0.0228531	0.187588	43824	0.214032	0.115014	0.874105	26476	653	0.0246638	-0.0783796	22032	508	0.0230574	0.321271	49669	0.0953399	0.379126	1.01401
005_B24	SPAC1B1.04C	pan3	25711	707	0.027498	0.530311	26337	705	0.0267684	0.415732	53460	0.460169	0.00263048	0.112116	24397	1013	0.0415215	0.673081	23155	773	0.0333837	0.855188	49338	0.745421	0.003682	0.214647
005_C01	SPAC1952.11C	ure2	11144	259	0.0232412	0.287672	6514	153	0.0234879	0.227115	18070	0.242666	0.252501	1.03159	7750	275	0.0354839	0.446386	3430	85	0.0247813	0.425297	11540	0.523343	0.132298	0.897571
005_C02	SPAC637.10C	rpn10	5170	132	0.0255319	0.423288	6785	213	0.0313928	0.645632	12300	0.549325	0.0321065	0.538637	3773	147	0.038961	0.581255	4325	121	0.0279769	0.600278	8366	0.562862	0.155429	0.93198
005_C03	SPAC23D3.12	SPAC23D3.12	6790	136	0.0200295	0.0731098	10869	317	0.0291655	0.539463	18112	0.379451	0.0798655	0.756444	5147	182	0.0353604	0.441357	7671	128	0.0166862	-0.1453	13128	0.110364	0.674392	1.02659
005_C04	SPBC16A3.01	spn3	1636	31	0.0189487	-0.00691794	5081	92	0.0181067	-0.148279	6840	-0.106887	0.470662	1.05731	1233	38	0.0308191	0.243049	4797	114	0.0237649	0.364873	6182	0.170108	0.826585	1.01843
005_C05	SPAC2C4.15C	ubx2	9578	172	0.0179578	-0.0844012	4648	68	0.0146299	-0.455876	14466	-0.225152	0.32479	1.04958	7808	207	0.0265113	0.0258284	3120	70	0.0224359	0.281852	11205	0.178123	0.595234	1.03811
005_C06	SPAC750.06C	SPAC750.06C	6754	143	0.0211726	0.153188	8317	149	0.0179151	-0.163623	15363	-0.0254635	0.90941	1.01532	7034	176	0.0250213	-0.0576193	9052	124	0.0136986	-0.429925	16386	-0.264577	0.582086	1.03819
005_C07	SPAC3G6.03C	SPAC3G6.03C	11299	215	0.0190282	-0.000871842	9180	188	0.0204793	0.0293659	20882	-0.00302219	0.90103	1.01676	8016	214	0.0266966	0.0358789	5674	97	0.0170955	-0.110338	14001	0.0200586	0.844945	1.01872
005_C08	SPBC405.04C	ypt7	656	14	0.0213415	0.164646	615	15	0.0243902	0.281504	1300	0.210432	0.959575	1.0085	524	30	0.0572519	1.13655	608	14	0.0230263	0.319327	1176	0.794896	0.29045	1.02735
005_C10	SPCC18B5.10C	SPCC18B5.10C	10395	147	0.0141414	-0.429087	8060	121	0.0150124	-0.418645	18723	-0.441435	0.0600623	0.706853	7954	281	0.0353281	0.44004	5670	107	0.0188713	0.0322333	14012	0.346173	0.263312	1.00595
005_C11	SPBC1347.09	SPBC1347.09	13967	232	0.0166106	-0.196911	20533	380	0.0185068	-0.116746	35112	-0.152721	0.692296	1.05585	8551	176	0.0205824	-0.339367	11913	217	0.0182154	-0.0187986	20857	-0.222292	0.734332	1.02196
005_C13	SPBC1773.06C	adh8	10602	199	0.01877	-0.0205814	6131	116	0.0189202	-0.0848702	17048	-0.0670011	0.802799	1.03306	8945	174	0.0194522	-0.420844	4409	82	0.0185983	0.0112156	13610	-0.224862	0.611153	1.03325
005_C14	SPAC17A2.02C	SPAC17A2.02C	4551	60	0.0131839	-0.530234	206	6	0.0291262	0.537518	4823	-0.507243	0.032066	0.540835	3981	147	0.0369254	0.503836	183	4	0.0218579	0.2442	4315	0.694773	0.168807	0.957488
005_C15	SPBC3B8.05	SPBC3B8.05	23943	419	0.0174999	-0.121667	18530	289	0.0155963	-0.363594	43181	-0.242453	0.417113	1.06438	16767	356	0.0212322	-0.294525	15088	223	0.01478	-0.320315	32434	-0.30169	0.660278	1.02594
005_C16	SPAC23H3.12C	SPAC23H3.12C	9950	187	0.018794	-0.0187436	15552	296	0.0190329	-0.0763036	25985	-0.058244	0.970376	1.00577	7942	252	0.03173	0.285072	10385	176	0.0169475	-0.122883	18755	0.0599067	0.658985	1.02545
005_C17	SPBC660.07	ntp1	10980	215	0.0195811	0.0404452	11153	261	0.0234018	0.221817	22609	0.125106	0.450883	1.06284	6146	133	0.0216401	-0.267071	6344	108	0.017024	-0.11639	12731	-0.215474	0.611197	1.03221
005_C18	SPBC1539.03C	SPBC1539.03C	8813	185	0.0209917	0.140807	10507	217	0.0206529	0.0415436	19722	0.0774436	0.64545	1.05261	7970	244	0.0306148	0.233452	9792	175	0.0178717	-0.0462774	18181	0.0744227	0.638645	1.01487
005_C19	SPCC1672.06C	asp1	15784	275	0.0174227	-0.128045	8937	172	0.0192458	-0.0602546	25168	-0.125119	0.71442	1.04999	15589	321	0.0205914	-0.338733	6688	114	0.0170455	-0.11457	22712	-0.198273	0.81143	1.02134
005_C20	SPBC6B1.05C	atg7	14155	277	0.0195691	0.0395608	14129	386	0.0273197	0.445141	28947	0.249366	0.134206	0.891127	12920	354	0.0273994	0.0733658	11940	207	0.0173367	-0.0901289	25421	0.010441	0.673675	1.02649
005_C21	SPCC31H12.08C	ccr4	10597	153	0.014438	-0.399138	13798	258	0.0186984	-0.101889	24806	-0.227104	0.394635	1.0593	7977	345	0.0432493	0.731901	8901	260	0.0292102	0.662515	17483	0.678058	0.0282318	0.532177
005_C22	SPCC162.11C	SPCC162.11C	15479	330	0.0213192	0.16314	20426	441	0.0215901	0.105571	36676	0.122889	0.311562	1.0465	19409	407	0.0209697	-0.312474	24418	327	0.0133918	-0.462611	44561	-0.419773	0.459814	1.04362
005_C23	SPCC965.05C	thp1	15833	315	0.0198952	0.0634038	9258	198	0.0213869	0.0919273	25604	0.0521321	0.631339	1.05413	8729	216	0.0247451	-0.0736344	6168	86	0.0139429	-0.404423	15199	-0.144207	0.813866	1.01952
005_C24	SPAC14C4.12C	laf1	15387	350	0.0227465	0.25663	24396	471	0.0193064	-0.0557182	40604	0.0655734	0.442705	1.06669	13018	339	0.0260409	0	20554	429	0.0208718	0.177602	34340	0.0301143	0.558901	1.03495
005_D01	SPAC1952.06C	SPAC1952.06C	14152	461	0.0325749	0.774747	9791	271	0.0276785	0.463964	24675	0.632583	0.00141358	0.0665436	10284	528	0.0513419	0.979359	6929	198	0.0285756	0.630825	17939	0.912737	0.00387254	0.217692
005_D02	SPCC31H12.04C	rpl1202	8867	213	0.0240217	0.335322	6544	194	0.0296455	0.563011	15818	0.421412	0.0681278	0.725929	5840	237	0.0405822	0.640069	3308	127	0.0383918	1.05684	9512	0.828677	0.0262515	0.526369
005_D03	SPAC1F12.05	SPAC1F12.05	6242	102	0.0163409	-0.220525	6117	157	0.0256662	0.355068	12618	0.0877333	0.789036	1.03866	3719	89	0.0239312	-0.121887	4246	97	0.022845	0.307924	8151	0.0598229	0.956053	1.00355
005_D05	SPAC26H5.07C	SPAC26H5.07C	8865	194	0.0218838	0.200851	7606	150	0.0197213	-0.025048	16815	0.0828237	0.690493	1.05617	8289	289	0.0348655	0.421022	5884	160	0.0271924	0.559246	14622	0.499837	0.114561	0.864839
005_D06	SPCC757.09C	rnc1	11090	184	0.0165915	-0.198567	5503	107	0.0194439	-0.0454801	16884	-0.169212	0.484035	1.0587	7550	147	0.0194702	-0.41951	3411	63	0.0184697	0.00120023	11171	-0.225724	0.556095	1.03585
005_D07	SPAC458.02C	SPAC458.02C	17811	332	0.0186402	-0.0305987	12047	238	0.019756	-0.022513	30428	-0.0468124	0.935149	1.01356	10862	221	0.0203462	-0.356021	5821	80	0.0137433	-0.425224	16984	-0.312349	0.499953	1.03748
005_D08	SPAC1F7.12	yak3	13239	260	0.0196389	0.0447041	5342	104	0.0194684	-0.043669	18945	-0.00954646	0.960205	1.00815	10763	209	0.0194184	-0.423355	3399	50	0.0147102	-0.327139	14421	-0.292806	0.497445	1.0405
005_D09	SPAC5D6.05	med18	8705	187	0.0214819	0.174109	7806	167	0.0213938	0.0923921	16865	0.120665	0.57212	1.06584	6378	214	0.0335528	0.365657	4284	120	0.0280112	0.602047	10996	0.483637	0.171755	0.962072
005_D10	SPCC1795.03	gms1	15064	375	0.0248938	0.386772	10808	248	0.022946	0.19344	26495	0.288184	0.10462	0.841767	9182	279	0.0303855	0.222607	7124	133	0.0186693	0.01671	16718	0.173508	0.473702	1.04208
005_D11	SPAC922.05C	SPAC922.05C	9432	153	0.0162214	-0.231117	12895	252	0.0195425	-0.0381887	22732	-0.120524	0.703721	1.05092	6398	210	0.0328228	0.333919	7007	133	0.018981	0.0406006	13748	0.191704	0.501557	1.03603
005_D12	SPCC417.11C	SPCC417.11C	17941	304	0.0169444	-0.168202	14701	295	0.0200667	0	33241	-0.10383	0.866694	1.02189	14395	267	0.0185481	-0.489506	10347	201	0.0194259	0.0740261	25210	-0.244187	0.734213	1.02225
005_D14	SPAC1071.11	SPAC1071.11	2585	57	0.0220503	0.211784	1598	40	0.0250313	0.318932	4280	0.23379	0.768547	1.04168	2304	81	0.0351562	0.433004	1271	35	0.0275374	0.577434	3691	0.534376	0.370073	1.01215
005_D15	SPBC1773.04	SPBC1773.04	15700	275	0.0175159	-0.120346	11614	197	0.0169623	-0.24247	27786	-0.190511	0.517802	1.06117	14489	223	0.015391	-0.758692	12485	173	0.0138566	-0.413381	27370	-0.609803	0.159036	0.939295
005_D17	SPBC25B2.06C	btb2	16092	302	0.0187671	-0.0208085	15663	267	0.0170465	-0.235321	32324	-0.138212	0.728325	1.05422	14068	240	0.01706	-0.61016	9047	112	0.0123798	-0.575969	23467	-0.556987	0.197651	0.978309
005_D18	SPCC16A11.16C	rpn1302	10155	171	0.016839	-0.177207	12913	198	0.0153334	-0.388124	23437	-0.301929	0.224594	1.00907	8858	150	0.0169338	-0.620868	7940	127	0.015995	-0.206339	17075	-0.442137	0.295354	1.01393
005_D19	SPBC32F12.11	tdh1	16269	267	0.0164116	-0.214299	33608	593	0.0176446	-0.185573	50737	-0.193695	0.595361	1.06449	11933	268	0.0224587	-0.213501	29489	380	0.0128862	-0.518134	42070	-0.518137	0.293253	1.01894
005_D20	SPAC1002.07C	ats1	19621	294	0.0149839	-0.345596	29044	561	0.0193155	-0.05504	49520	-0.166617	0.696517	1.05312	20383	349	0.0171221	-0.604917	20940	334	0.0159503	-0.21037	42006	-0.438793	0.420011	1.04028
005_D21	SPBC887.17	SPBC887.17	19821	395	0.0199284	0.0658095	44358	864	0.0194779	-0.0429637	65438	-0.0075517	0.59705	1.0657	16079	428	0.0266186	0.0316557	40178	613	0.0152571	-0.274476	57298	-0.275868	0.791724	1.01604
005_D22	SPAC15A10.07	SPAC15A10.07	25767	461	0.0178911	-0.0897712	30437	700	0.0229983	0.196728	57365	0.0669665	0.364425	1.05935	23582	543	0.023026	-0.177511	23607	477	0.0202059	0.130818	48209	-0.0516868	0.677417	1.02574
005_D24	SPAC1F5.08C	yam8	15214	315	0.0207046	0.120939	6304	152	0.0241117	0.264931	21985	0.138222	0.42483	1.06681	10702	457	0.0427023	0.713536	3855	109	0.028275	0.615569	15123	0.795355	0.0147128	0.436944
005_E01	SPAC19E9.01C	nup40	12380	329	0.0265751	0.481063	11747	226	0.019239	-0.0607702	24682	0.222182	0.207203	1.0008	9577	406	0.0423932	0.703057	7483	199	0.0265936	0.527123	17665	0.662584	0.0311146	0.550274
005_E02	SPAC922.06	SPAC922.06	9522	167	0.0175383	-0.118502	8315	163	0.0196031	-0.0337169	18167	-0.0920637	0.7377	1.05138	6569	256	0.0389709	0.581621	4894	129	0.0263588	0.514328	11848	0.58414	0.0910128	0.78281
005_E03	SPAC23H4.08	iwr1	13961	244	0.0174773	-0.123535	11528	190	0.0164816	-0.283943	25923	-0.211836	0.44275	1.06435	11621	354	0.0304621	0.226238	11643	243	0.0208709	0.177537	23861	0.195898	0.344143	1.00033
005_E04	SPCC1682.12C	ubp16	3335	86	0.0257871	0.437636	2313	49	0.0211846	0.0782158	5783	0.277491	0.562352	1.06143	2849	95	0.033345	0.356694	1665	45	0.027027	0.550446	4654	0.469215	0.395985	1.02345
005_E05	SPAC2E12.03C	SPAC2E12.03C	15117	325	0.021499	0.175254	10351	222	0.0214472	0.0959889	26015	0.123198	0.409012	1.06262	11070	274	0.0247516	-0.0732568	6157	110	0.0178658	-0.0467528	17611	-0.00729867	0.82644	1.01865
005_E06	SPBC1289.09	tim21	9864	179	0.0181468	-0.0692985	6732	110	0.0163399	-0.296404	16885	-0.179423	0.456646	1.06058	5759	134	0.0232679	-0.162435	3768	86	0.0228238	0.306581	9747	0.0436761	0.925147	1.00426
005_E07	SPAC3G6.06C	rad2	19814	400	0.0201877	0.0844664	11726	223	0.0190176	-0.0774679	32163	0.00239274	0.728992	1.05373	11565	340	0.029399	0.174992	5886	121	0.0205573	0.155691	17912	0.237724	0.349695	1.00442
005_E08	SPBC418.01C	his4	14077	226	0.0160546	-0.246031	13827	215	0.0155493	-0.367952	28345	-0.31935	0.206383	1.00144	10097	236	0.0233733	-0.155917	14329	157	0.0109568	-0.75213	24819	-0.477622	0.299203	1.01606
005_E09	SPAC8C9.04	SPAC8C9.04	17360	330	0.0190092	-0.00231433	36560	642	0.0175602	-0.192493	54892	-0.129521	0.862346	1.02327	14767	307	0.0207896	-0.324916	25299	364	0.0143879	-0.359099	40737	-0.419799	0.451638	1.05237
005_E10	SPAC23H3.11C	SPAC23H3.11C	15627	274	0.0175338	-0.118878	39566	598	0.015114	-0.408916	56065	-0.319814	0.227809	1.00914	12231	222	0.0181506	-0.52076	30326	400	0.01319	-0.484512	43179	-0.616215	0.176769	0.959427
005_E11	SPBC14C8.03	fma2	21785	409	0.0187744	-0.0202477	9992	213	0.0213171	0.0872074	32399	-0.0107251	0.7759	1.03915	18557	469	0.0252735	-0.043153	7620	166	0.0217848	0.239363	26812	0.114723	0.451623	1.05312
005_E12	SPAC3C7.05C	mug191	19221	332	0.0172728	-0.140514	31124	498	0.0160005	-0.326682	51175	-0.258394	0.380503	1.05365	13458	258	0.0191708	-0.44187	22697	291	0.0128211	-0.525439	36704	-0.561123	0.228747	0.987786
005_E13	SPBC18E5.07	SPBC18E5.07	25917	471	0.0181734	-0.0671851	12214	221	0.018094	-0.14929	38823	-0.119849	0.84071	1.02815	16942	396	0.0233739	-0.155881	5917	95	0.0160554	-0.200895	23350	-0.0607728	0.859018	1.01356
005_E14	SPAC664.07C	rad9	20950	418	0.0199523	0.0675393	22164	426	0.0192204	-0.0621655	43958	-0.0105702	0.686626	1.0595	14712	402	0.0273246	0.0694247	15647	245	0.015658	-0.237061	31006	-0.0720921	0.808309	1.02109
005_E16	SPAC27E2.07	pvg2	2053	52	0.0253288	0.411765	1204	18	0.0149502	-0.424639	3327	0.124154	0.890066	1.02194	968	45	0.0464876	0.836069	508	27	0.0531496	1.5261	1548	1.12257	0.0618562	0.697933
005_E18	SPBC16C6.01C	SPBC16C6.01C	19404	334	0.0172129	-0.145519	23268	374	0.0160736	-0.32011	43380	-0.249197	0.397575	1.05998	14053	311	0.0221305	-0.234741	17721	191	0.0107782	-0.775844	32276	-0.503893	0.292089	1.02053
005_E19	SPCC16A11.01	SPCC16A11.01	18634	310	0.0166363	-0.194683	31296	522	0.0166794	-0.266729	50762	-0.24298	0.4266	1.06195	12375	246	0.0198788	-0.389548	13432	176	0.013103	-0.494056	26229	-0.454253	0.340199	1.00464
005_E20	SPBC947.06C	SPBC947.06C	9942	178	0.0179038	-0.0887442	14054	245	0.0174328	-0.203	24419	-0.161793	0.583262	1.06582	9007	191	0.0212057	-0.296323	11921	277	0.0232363	0.332424	21396	-0.00265941	0.753132	1.01841
005_E21	SPCC4G3.15C	not2	24126	298	0.0123518	-0.62429	17770	285	0.0160383	-0.323282	42479	-0.502973	0.0301664	0.531535	11658	274	0.0235032	-0.147922	5768	85	0.0147365	-0.324565	17785	-0.120991	0.916296	1.01104
005_E23	SPAC16E8.06C	nop12	49062	996	0.0203008	0.0925263	20198	438	0.0216853	0.111918	70694	0.070294	0.326717	1.05149	30037	714	0.0237707	-0.131594	13399	232	0.0173147	-0.0919574	44382	-0.0407846	0.664453	1.02534
005_E24	SPAC15A10.05C	mug182	18863	412	0.0218417	0.198072	28400	664	0.0233803	0.220492	48339	0.207238	0.111338	0.858582	16039	466	0.0290542	0.157968	29153	517	0.017734	-0.0574369	46175	-0.0426095	0.662721	1.02619
005_F01	SPAC19A8.02	SPAC19A8.02	11529	280	0.0242866	0.351146	4522	135	0.029854	0.573126	16466	0.390791	0.084613	0.787225	9841	366	0.0371913	0.514189	3345	91	0.0272048	0.559903	13643	0.629454	0.0569539	0.686938
005_F02	SPCC364.06	nap1	5684	179	0.0314919	0.725968	6400	181	0.0282813	0.495045	12444	0.595242	0.0191849	0.429142	4504	201	0.044627	0.777139	4036	104	0.0257681	0.481629	8845	0.672768	0.0798682	0.739485
005_F03	SPAC20G4.04C	hus1	14055	317	0.0225543	0.244386	7164	132	0.0184255	-0.1231	21668	0.101702	0.533974	1.06323	12568	332	0.0264163	0.0206507	6012	120	0.0199601	0.113161	19032	0.118839	0.535858	1.03872
005_F04	SPCC645.11C	mug117	12118	244	0.0201353	0.0807161	12114	243	0.0200594	-0.000519663	24719	0.0273515	0.729813	1.05443	6397	207	0.0323589	0.313386	7379	91	0.0123323	-0.581516	14074	-0.0505782	0.99841	1.00032
005_F05	SPAC27F1.03C	uch1	18886	347	0.0183734	-0.0513949	13307	298	0.0223942	0.158326	32838	0.0228954	0.647529	1.05165	15945	320	0.020069	-0.37581	9320	158	0.0169528	-0.122434	25743	-0.243863	0.739982	1.0217
005_F06	SPCC757.11C	SPCC757.11C	12193	211	0.017305	-0.137824	9211	169	0.0183476	-0.129207	21784	-0.151538	0.590593	1.0626	7219	176	0.0243801	-0.0950729	4199	81	0.0192903	0.0639193	11675	0.0067249	0.940037	1.00381
005_F07	SPAC4A8.04	isp6	2285	50	0.0218818	0.200721	18688	335	0.0179259	-0.162752	21358	-0.103332	0.745932	1.04749	1254	58	0.046252	0.828738	15820	251	0.015866	-0.218019	17383	-0.307928	0.513414	1.03671
005_F08	SPAC186.09	SPAC186.09	10600	189	0.0178302	-0.0946914	5984	119	0.0198864	-0.0130212	16892	-0.0865184	0.734866	1.05162	8004	185	0.0231134	-0.172045	3605	57	0.0158114	-0.222994	11851	-0.10397	0.821009	1.01874
005_F09	SPAC5H10.09C	SPAC5H10.09C	10988	186	0.0169276	-0.16964	16623	288	0.0173254	-0.211913	28085	-0.200013	0.490452	1.0523	7633	197	0.025809	-0.0129039	8507	146	0.0171623	-0.104711	16483	-0.0761655	0.994256	1.00125
005_F10	SPAC5D6.09C	mug86	15981	230	0.0143921	-0.403737	17968	345	0.0192008	-0.0636341	34524	-0.219464	0.46247	1.05698	11412	301	0.0263757	0.0184344	8013	165	0.0205915	0.158095	19891	0.0986819	0.56181	1.03486
005_F12	SPBC3B8.03	SPBC3B8.03	14728	282	0.0191472	0.00812022	25398	522	0.0205528	0.0345343	40930	0.0230014	0.581437	1.06681	9253	263	0.0284232	0.126292	11906	284	0.0238535	0.370245	21706	0.206536	0.349664	1.00524
005_F13	SPBC1198.14C	fbp1	19217	302	0.0157153	-0.276848	14156	252	0.0178016	-0.172791	33927	-0.248452	0.377029	1.05985	16188	278	0.0171732	-0.600617	9394	139	0.0147967	-0.318683	25999	-0.458815	0.332185	1.01428
005_F14	SPAC1D4.05C	SPAC1D4.05C	2467	44	0.0178354	-0.0942676	1793	50	0.0278862	0.474752	4354	0.162151	0.94746	1.01367	1651	87	0.0526953	1.0169	961	19	0.0197711	0.0994342	2718	0.857104	0.127372	0.891039
005_F15	SPBC1773.08C	omh4	21814	369	0.0169157	-0.170647	23114	401	0.0173488	-0.209965	45698	-0.202413	0.553164	1.05866	14476	253	0.0174772	-0.575303	11373	165	0.014508	-0.347104	26267	-0.470339	0.316636	1.01815
005_F16	SPAC31A2.15C	dcc1	16493	357	0.0216455	0.185057	13488	273	0.0202402	0.0124238	30611	0.0916466	0.445915	1.06466	7104	193	0.0271678	0.0611199	5578	120	0.0215131	0.221258	12995	0.139647	0.61884	1.02586
005_F17	SPBC25B2.07C	mmb1	19787	319	0.0161217	-0.24001	22784	417	0.0183023	-0.132774	43307	-0.189822	0.591575	1.06254	11105	191	0.0171995	-0.598414	8763	113	0.0128951	-0.517131	20172	-0.550109	0.190501	0.979898
005_F18	SPCC1884.02	nic1	39614	728	0.0183773	-0.0510853	25139	446	0.0177414	-0.177684	65927	-0.121243	0.916546	1.01574	16926	276	0.0163063	-0.67535	8540	140	0.0163934	-0.170838	25882	-0.455722	0.336199	1.00796
005_F19	SPBC354.07C	SPBC354.07C	16563	273	0.0164825	-0.208076	17221	318	0.0184658	-0.119943	34375	-0.172839	0.615435	1.06186	9814	203	0.0206847	-0.332211	5976	87	0.0145582	-0.342122	16080	-0.286692	0.534778	1.0379
005_F20	SPAC1071.09C	SPAC1071.09C	28926	732	0.025306	0.410463	63366	1560	0.0246189	0.294965	94584	0.332673	0.0105488	0.291851	18096	362	0.0200044	-0.380459	30466	538	0.017659	-0.0635508	49462	-0.273636	0.786086	1.01877
005_F21	SPBC8D2.12C	SPBC8D2.12C	19582	340	0.0173629	-0.133007	35365	629	0.0177859	-0.174063	55916	-0.161201	0.731706	1.05283	18206	432	0.0237284	-0.13416	29345	398	0.0135628	-0.444303	48381	-0.360098	0.586843	1.03961
005_F22	SPAC15E1.02C	SPAC15E1.02C	14398	303	0.0210446	0.144436	15120	309	0.0204365	0.026348	30130	0.0722799	0.50968	1.05759	11746	368	0.0313298	0.266759	11102	174	0.0156729	-0.235689	23390	0.0824915	0.54722	1.03899
005_F23	SPCC1223.12C	meu10	15902	362	0.0227644	0.257768	11343	283	0.0249493	0.314199	27890	0.263651	0.123219	0.877277	12781	477	0.037321	0.519211	7412	206	0.0277928	0.590753	20876	0.594297	0.0400278	0.600036
005_F24	SPAC20H4.06C	SPAC20H4.06C	23342	687	0.0294319	0.628369	21955	698	0.0317923	0.663877	46682	0.632742	0.000132479	0.010446	20834	1447	0.0694538	1.41528	20436	885	0.0433059	1.23061	43602	1.33467	2.8124e-06	0.000983714
005_G01	SPAC1A6.09C	lag1	17001	444	0.0261161	0.455927	3703	101	0.0272752	0.442788	21249	0.41669	0.040319	0.594234	14951	630	0.0421376	0.694332	2226	57	0.0256065	0.472551	17864	0.836099	0.00772167	0.289379
005_G02	SPBC21D10.12	hob1	11642	247	0.0212163	0.156159	13642	260	0.0190588	-0.0743442	25791	0.0241043	0.725933	1.05269	8933	273	0.0305608	0.230907	9073	146	0.0160917	-0.19764	18425	0.054739	0.675588	1.02593
005_G03	SPAC24C9.15C	spn5	9168	200	0.021815	0.196308	12987	230	0.01771	-0.180235	22585	-0.0229524	0.945298	1.01411	8496	295	0.0347222	0.415082	8335	206	0.0247151	0.421433	17332	0.409956	0.156877	0.935319
005_G04	SPAC227.18	lys3	5207	121	0.0232379	0.287469	13897	277	0.0199324	-0.00968816	19502	0.0792369	0.643995	1.05405	3217	137	0.0425863	0.709611	5613	91	0.0162124	-0.186862	9058	0.204815	0.619077	1.02517
005_G05	SPAC2F3.05C	SPAC2F3.05C	15692	246	0.0156768	-0.280384	9655	202	0.0209218	0.0602065	25795	-0.157973	0.607739	1.06312	12226	238	0.0194667	-0.419768	5252	131	0.0249429	0.434671	17847	-0.0856528	0.998775	0.99941
005_G06	SPBC1289.14	SPBC1289.14	6026	115	0.019084	0.00334788	12039	205	0.017028	-0.236892	18385	-0.154782	0.542652	1.06174	5819	244	0.0419316	0.687261	8771	154	0.0175579	-0.0718397	14988	0.284055	0.328077	1.01353
005_G07	SPAC3H1.11	hsr1	3009	68	0.0225989	0.247237	17908	373	0.0208287	0.0537707	21358	0.0964459	0.55529	1.0608	2204	100	0.0453721	0.801026	8694	261	0.0300207	0.702001	11259	0.564202	0.108784	0.847657
005_G08	SPBC4C3.08	mug136	39	0	0	--	18864	345	0.0182888	-0.13384	19248	-0.111676	0.688797	1.05665	7566	286	0.0378007	0.537635	10852	189	0.0174161	-0.0835316	18893	0.203078	0.389511	1.01758
005_G09	SPAC8E11.10	SPAC8E11.10	29752	419	0.0140831	-0.43505	39677	662	0.0166847	-0.266272	70510	-0.340901	0.180563	0.981887	20331	305	0.0150017	-0.795649	23015	378	0.0164241	-0.168145	44029	-0.507747	0.311032	1.01569
005_G10	SPAC11E3.08C	nse6	35321	572	0.0161943	-0.233524	22140	348	0.0157182	-0.352369	58381	-0.300606	0.270627	1.04475	13487	309	0.022911	-0.18474	10212	130	0.0127301	-0.535711	24138	-0.274339	0.657726	1.02501
005_G11	SPBC14C8.05C	meu17	65	1	0.0153846	-0.307525	67	0	0	--	133	--	--	0.158655	77	1	0.012987	-1.00371	1423	10	0.00702741	-1.39289	1511	-1.61119	2.81575e-05	0.00633142
005_G12	SPBC1D7.03	mug80	54	1	0.0185185	-0.0400447	63	0	0	--	118	--	--	0.158655	62	2	0.0322581	0.308882	1151	15	0.0130321	-0.501882	1230	-0.676778	0.0355326	0.570697
005_G13	SPBC29B5.04C	SPBC29B5.04C	27557	467	0.0169467	-0.16801	14994	290	0.0193411	-0.0531331	43308	-0.148557	0.747943	1.04659	14924	323	0.021643	-0.266878	6619	111	0.0167699	-0.138082	21977	-0.153258	0.906268	1.01096
005_G14	SPBC6B1.06C	ubp14	13505	203	0.0150315	-0.341027	13691	219	0.0159959	-0.327098	27618	-0.345808	0.163044	0.964805	7716	218	0.028253	0.117626	7450	111	0.0148993	-0.308709	15495	-0.0464865	0.958973	1.00327
005_G15	SPBC405.03C	SPBC405.03C	17317	263	0.0151874	-0.32614	24619	440	0.0178724	-0.167069	42639	-0.234321	0.440716	1.0676	13522	229	0.0169354	-0.620738	11772	205	0.0174142	-0.0836924	25728	-0.384834	0.451998	1.04933
005_G16	SPAC2E1P3.02C	amt3	31673	528	0.0166704	-0.191729	35064	605	0.0172542	-0.217856	67870	-0.216068	0.525902	1.06191	21874	454	0.0207552	-0.327302	15034	222	0.0147665	-0.321626	37584	-0.290644	0.71041	1.02539
005_G17	SPBC9B6.11C	SPBC9B6.11C	72	1	0.0138889	-0.455082	15876	323	0.0203452	0.019886	16272	0.0429615	0.835323	1.03075	24815	420	0.0169252	-0.621601	13515	162	0.0119867	-0.622525	38912	-0.561188	0.232242	0.989307
005_G19	SPCC18B5.05C	SPCC18B5.05C	81	1	0.0123457	-0.625007	17251	315	0.0182598	-0.136129	17648	-0.11317	0.660647	1.0561	16616	324	0.0194993	-0.417357	8081	129	0.0159634	-0.209192	25150	-0.288558	0.636739	1.01491
005_G20	SPCC1393.02C	spt2	15789	282	0.0178605	-0.092238	36692	633	0.0172517	-0.218061	53396	-0.17768	0.661284	1.05551	11404	218	0.0191161	-0.445989	15028	196	0.0130423	-0.500756	26846	-0.516388	0.257048	1.0052
005_G21	SPCC613.06	rpl902	2081	58	0.0278712	0.549763	2134	55	0.0257732	0.361071	4328	0.443061	0.324513	1.053	1741	93	0.0534176	1.03654	1566	49	0.0312899	0.761741	3449	0.938562	0.0641671	0.703826
005_G22	SPAC7D4.04	atg11	21513	365	0.0169665	-0.166326	24816	464	0.0186976	-0.101946	47158	-0.1402	0.795729	1.03579	13562	278	0.0204985	-0.345263	18669	280	0.0149981	-0.299175	32789	-0.371917	0.515785	1.03552
005_G23	SPAC9E9.10C	cbh1	16111	373	0.0231519	0.282116	20441	430	0.0210362	0.0680702	37355	0.155793	0.234607	1.01363	15876	437	0.0275258	0.0800084	16049	241	0.0150165	-0.297407	32603	-0.0771348	0.808165	1.02173
005_G24	SPAC15A10.09C	pun1	13627	260	0.0190798	0.00303023	18169	386	0.021245	0.0823212	32442	0.0430321	0.581295	1.06717	8851	219	0.024743	-0.073759	12608	225	0.0178458	-0.0483713	21903	-0.114757	0.995425	1.00083
005_H01	SPAC19G12.03	cda1	11520	215	0.0186632	-0.0288175	15379	295	0.019182	-0.0650474	27409	-0.0567121	0.993357	1.00129	12474	428	0.0343114	0.397909	12419	244	0.0196473	0.0903753	25565	0.268988	0.232786	0.986285
005_H02	SPCC417.05C	cfh2	1971	48	0.0243531	0.355093	6961	165	0.0237035	0.240299	9145	0.274142	0.408624	1.06337	1624	52	0.0320197	0.298183	4183	94	0.0224719	0.284166	5953	0.16637	0.847754	1.0186
005_H03	SPAC212.08C	SPAC212.08C	12428	211	0.0169778	-0.165365	7411	161	0.0217245	0.11452	20211	-0.0726934	0.836712	1.03005	8401	225	0.0267825	0.0405146	4817	67	0.0139091	-0.407931	13510	-0.020269	0.947715	1.00451
005_H04	SPCC663.06C	osr1	10397	201	0.0193325	0.0220148	6296	136	0.021601	0.106299	17030	0.0338486	0.848644	1.02828	6716	155	0.0230792	-0.174183	3997	82	0.0205154	0.152749	10950	-0.018209	0.981685	1.00303
005_H05	SPAC27F1.08	pdt1	13879	282	0.0203185	0.0937781	14207	250	0.017597	-0.189475	28618	-0.0580817	0.998208	0.999793	12962	258	0.0199043	-0.387695	10315	122	0.0118274	-0.64182	23657	-0.456639	0.322583	1.01346
005_H06	SPCC777.12C	SPCC777.12C	15827	304	0.0192077	0.0126701	10370	176	0.016972	-0.241641	26677	-0.106024	0.798958	1.0353	9991	171	0.0171154	-0.605482	7399	113	0.0152723	-0.273036	17674	-0.4561	0.282083	1.03016
005_H07	SPAC4G8.07C	SPAC4G8.07C	6960	116	0.0166667	-0.192048	10634	213	0.0200301	-0.0026316	17923	-0.0766527	0.785604	1.03804	7376	159	0.0215564	-0.272661	4426	119	0.0268866	0.542929	12080	0.07232	0.78423	1.01846
005_H08	SPAC5D6.13	SPAC5D6.13	13958	221	0.0158332	-0.266059	13140	181	0.0137747	-0.542776	27500	-0.410648	0.0878383	0.796098	8526	193	0.0226366	-0.202118	6105	101	0.0165438	-0.157665	14925	-0.156946	0.780145	1.01989
005_H09	SPAC5H10.13C	gmh2	17087	296	0.0173231	-0.136315	17218	294	0.0170752	-0.232902	34895	-0.197361	0.534259	1.06245	10500	275	0.0261905	0.00826484	7954	133	0.0167211	-0.142283	18862	-0.0190979	0.830302	1.01942
005_H10	SPAC688.03C	SPAC688.03C	27034	422	0.01561	-0.286545	18157	325	0.0178994	-0.164887	45938	-0.254584	0.38594	1.05573	12834	277	0.0215833	-0.270862	5530	97	0.0175407	-0.0732516	18738	-0.137576	0.894637	1.01379
005_H11	SPAC9G1.08C	SPAC9G1.08C	42	2	0.047619	1.32253	52	1	0.0192308	-0.0613842	97	--	--	0.158655	47	1	0.0212766	-0.29151	39	3	0.0769231	2.05946	90	--	--	0.158655
005_H12	SPBC16D10.07C	sir2	39	1	0.025641	0.429441	36	1	0.0277778	0.469131	77	--	--	0.158655	50	0	0	--	587	8	0.0136286	-0.437317	645	--	--	0.158655
005_H13	SPBC12C2.07C	srm1	21523	332	0.0154254	-0.303709	10555	156	0.0147797	-0.441181	32566	-0.37436	0.129619	0.886808	12068	220	0.01823	-0.514461	4197	55	0.0131046	-0.493884	16540	-0.406073	0.340472	1.00356
005_H14	SPAC24B11.06C	sty1	24301	442	0.0181886	-0.0659827	15874	269	0.0169459	-0.24386	40886	-0.156105	0.708491	1.04811	13915	480	0.0344951	0.405616	7216	137	0.0189856	0.0409478	21748	0.382176	0.146372	0.927123
005_H15	SPBC1773.12	SPBC1773.12	11000	242	0.022	0.20849	11851	210	0.01772	-0.17942	23303	0.00440871	0.833791	1.02967	6206	155	0.0249758	-0.0602448	6891	134	0.0194457	0.0754909	13386	-0.0219004	0.954654	1.00342
005_H16	SPAC513.07	SPAC513.07	25231	387	0.0153383	-0.311877	26885	475	0.0176678	-0.183675	52978	-0.253695	0.39575	1.06049	11877	174	0.0146502	-0.829861	8141	114	0.0140032	-0.398201	20306	-0.638963	0.117123	0.86958
005_H17	SPBC25H2.03	SPBC25H2.03	21618	340	0.0157276	-0.275712	19725	340	0.017237	-0.219291	42023	-0.261765	0.359856	1.05975	10598	173	0.0163238	-0.673797	6376	106	0.0166248	-0.150616	17253	-0.446795	0.290732	1.0226
005_H19	SPBC359.05	abc3	16335	265	0.0162228	-0.230988	19302	323	0.016734	-0.262017	36225	-0.257217	0.360027	1.05926	10149	220	0.021677	-0.264612	7526	139	0.0184693	0.00117285	18034	-0.14146	0.873857	1.01099
005_H20	SPAC1142.05	ctr5	16412	372	0.0226663	0.251538	35448	770	0.021722	0.114354	53002	0.159212	0.168096	0.965711	12089	261	0.0215899	-0.270423	18683	290	0.0155221	-0.24963	31323	-0.323299	0.607359	1.03461
005_H21	SPBC902.06	mto2	21303	368	0.0172746	-0.140364	31170	607	0.0194739	-0.0432623	53448	-0.0858298	0.953607	1.01234	19502	382	0.0195877	-0.410827	22137	338	0.0152686	-0.273393	42359	-0.373672	0.545769	1.04
005_H22	SPAC17A5.07C	ulp2	14746	255	0.0172928	-0.13884	16440	325	0.0197689	-0.0215712	31766	-0.0845024	0.930141	1.01476	13364	271	0.0202784	-0.360836	15773	234	0.0148355	-0.314905	29642	-0.370302	0.502894	1.03607
005_H23	SPCC1442.01	ste6	12318	231	0.018753	-0.0218886	16056	309	0.0192451	-0.0603063	28914	-0.0512669	0.968617	1.00593	12091	307	0.0253908	-0.0364724	13879	269	0.0193818	0.0707457	26546	-0.0145107	0.716751	1.02328
005_H24	SPAC22A12.11	dak1	13773	297	0.0215639	0.179607	13808	284	0.0205678	0.0355859	28162	0.0952066	0.462076	1.05761	10484	399	0.038058	0.547422	10925	295	0.0270023	0.549125	22103	0.532985	0.056855	0.688383
005_I01	SPAC1D4.01	tls1	10897	245	0.0224833	0.239837	7632	179	0.0234539	0.225026	18953	0.214622	0.292989	1.0325	11485	496	0.0431868	0.729812	5770	211	0.0365685	0.986643	17962	0.870962	0.00563391	0.260817
005_I02	SPCC1739.08C	SPCC1739.08C	9788	217	0.02217	0.219596	9328	195	0.0209048	0.0590338	19528	0.128207	0.494657	1.05487	8385	401	0.0478235	0.876942	5927	97	0.0163658	-0.173274	14810	0.635187	0.0488065	0.67093
005_I03	SPAC24H6.10C	SPAC24H6.10C	13544	264	0.019492	0.0338706	11852	269	0.0226966	0.177675	25929	0.0898775	0.505737	1.05496	10772	273	0.0253435	-0.0391626	7373	157	0.0212939	0.206484	18575	0.0810311	0.618242	1.02595
005_I04	SPAC343.10	met11	3275	96	0.029313	0.622526	3672	93	0.0253268	0.335864	7136	0.464267	0.169429	0.968081	2892	87	0.030083	0.20817	2824	62	0.0219547	0.250571	5865	0.218501	0.748737	1.01947
005_I05	SPAC2G11.07C	ptc3	15160	253	0.0166887	-0.190146	8132	144	0.0177078	-0.180414	23689	-0.210352	0.432511	1.06824	12498	289	0.0231237	-0.171405	4835	102	0.0210962	0.193025	17724	0.00991373	0.785808	1.01925
005_I06	SPBC18E5.13	SPBC18E5.13	11896	284	0.0238736	0.326401	11567	207	0.0178957	-0.165185	23954	0.0856788	0.546575	1.06086	8774	233	0.0265557	0.0282459	7504	97	0.0129264	-0.513632	16608	-0.144191	0.841897	1.017
005_I07	SPAC3H8.02	csr102	18545	430	0.0231868	0.284293	8454	203	0.0240123	0.258973	27632	0.249643	0.142202	0.902423	12127	312	0.0257277	-0.0174541	3710	112	0.0301887	0.710051	16261	0.257032	0.345891	0.997128
005_I08	SPBC4F6.11C	SPBC4F6.11C	9715	202	0.0207926	0.127056	16481	241	0.0146229	-0.456571	26639	-0.221697	0.419419	1.06253	6510	227	0.0348694	0.421185	6877	133	0.0193398	0.0676182	13747	0.263431	0.381801	1.01086
005_I09	SPAC977.11	SPAC977.11	22446	439	0.0195581	0.0387492	14609	267	0.0182764	-0.134818	37761	-0.0496568	0.881994	1.02461	17241	436	0.0252886	-0.0422928	10173	210	0.0206429	0.161687	28060	0.0728878	0.519048	1.03546
005_I10	SPBC1778.10C	ppk21	15158	246	0.0162291	-0.230435	9046	124	0.0137077	-0.549812	24574	-0.367377	0.130267	0.88931	9236	255	0.0276094	0.0843797	4752	104	0.0218855	0.24602	14347	0.196061	0.480367	1.03931
005_I13	SPBC2D10.17	clr1	18461	353	0.0191214	0.00617407	40939	780	0.0190527	-0.0748024	60533	-0.0480437	0.772249	1.03911	12974	288	0.0221982	-0.230332	19698	316	0.0160422	-0.202081	33276	-0.27724	0.719693	1.02054
005_I15	SPBC409.11	meu18	11301	159	0.0140696	-0.436437	11708	175	0.014947	-0.42494	23343	-0.442007	0.0618799	0.707135	8693	169	0.0194409	-0.42168	7309	67	0.00916678	-1.00947	16238	-0.603199	0.127347	0.892849
005_I16	SPAC30D11.07	nth1	26313	462	0.0175579	-0.116896	25131	528	0.0210099	0.0662692	52434	-0.0352311	0.744005	1.04946	16821	488	0.0290114	0.15584	10771	210	0.0194968	0.0792803	28290	0.175244	0.339559	1.00653
005_I17	SPBP22H7.04	SPBP22H7.04	27274	510	0.0186991	-0.0260425	48658	916	0.0188253	-0.0921301	77358	-0.0704627	0.847221	1.02854	19650	361	0.0183715	-0.503308	26604	420	0.0157871	-0.225211	47035	-0.407989	0.486607	1.04065
005_I18	SPBC2G2.13C	dcd1	17695	293	0.0165583	-0.201455	48843	663	0.0135741	-0.563944	67494	-0.456825	0.047332	0.627248	11738	361	0.0307548	0.240035	30779	393	0.0127684	-0.531374	43271	-0.337209	0.625525	1.02135
005_I19	SPCC23B6.01C	SPCC23B6.01C	18316	272	0.0148504	-0.358511	12063	187	0.0155019	-0.372351	30838	-0.384237	0.116623	0.867523	13639	269	0.0197229	-0.400909	10668	235	0.0220285	0.255414	24811	-0.111682	0.960914	1.00297
005_I20	SPCC1494.09C	tfb6	12280	209	0.0170195	-0.161821	39157	646	0.0164977	-0.282537	52292	-0.246539	0.417013	1.06499	9296	199	0.0214071	-0.282691	32051	364	0.0113569	-0.700388	41910	-0.718381	0.0950606	0.793769
005_I21	SPCC63.14	eis1	19614	313	0.015958	-0.254735	64	2	0.03125	0.639056	19993	-0.300889	0.214669	0.99715	11409	215	0.0188448	-0.466613	14839	164	0.011052	-0.739655	26627	-0.633743	0.137275	0.90977
005_I22	SPCC364.05	vps3	1743	36	0.020654	0.117411	2647	70	0.026445	0.398196	4496	0.292115	0.611993	1.0629	1309	48	0.0366692	0.493792	1927	51	0.026466	0.520184	3335	0.449483	0.520992	1.03606
005_I23	SPACUNK4.12C	iph1	19986	453	0.0226659	0.251508	34650	676	0.0195094	-0.0406328	55765	0.067465	0.367802	1.05747	18755	421	0.0224473	-0.214232	36452	449	0.0123176	-0.583239	56077	-0.507569	0.320661	1.01248
005_I24	SPAC167.04	pam17	20157	396	0.0196458	0.0452061	24030	505	0.0210154	0.0666461	45088	0.0482484	0.470908	1.05636	20434	577	0.0282373	0.116822	30100	437	0.0145183	-0.346087	51548	-0.159002	0.926954	1.00277
005_J01	SPAC1B3.03C	wis2	6101	225	0.0368792	0.953794	4834	127	0.0262722	0.388738	11287	0.706965	0.00693782	0.232786	5688	285	0.0501055	0.944191	4102	120	0.029254	0.664678	10195	0.884808	0.0153722	0.44807
005_J03	SPAC222.08C	SPAC222.08C	13191	252	0.0191039	0.00485639	9613	185	0.0192448	-0.060334	23241	-0.0413104	0.996791	0.999643	9701	300	0.0309246	0.24798	7066	130	0.018398	-0.00441087	17197	0.194979	0.42841	1.04303
005_J04	SPCC663.10	SPCC663.10	11520	199	0.0172743	-0.140386	11606	270	0.0232638	0.213288	23595	0.0404154	0.701264	1.05023	7881	171	0.0216978	-0.263232	7647	112	0.0146463	-0.333424	15811	-0.297803	0.510067	1.03526
005_J07	SPAC4H3.04C	SPAC4H3.04C	17709	314	0.0177311	-0.102732	21395	448	0.0209395	0.0614244	39866	-0.017182	0.738261	1.05076	13653	346	0.0253424	-0.0392234	14939	261	0.017471	-0.0789906	29199	-0.0776485	0.836367	1.01852
005_J08	SPAC9E9.15	SPAC9E9.15	10265	179	0.0174379	-0.126787	14368	256	0.0178174	-0.171516	25068	-0.159234	0.597298	1.06494	6369	160	0.0251217	-0.0518443	6923	87	0.0125668	-0.554339	13539	-0.269781	0.524016	1.03423
005_J09	SPAC630.14C	tup12	1436	31	0.0215877	0.181199	4654	93	0.0199828	-0.00604115	6214	0.0461692	0.839198	1.02949	922	22	0.0238612	-0.126113	3798	135	0.035545	0.945691	4877	0.570172	0.258836	1.00347
005_J10	SPAC6F12.06	SPAC6F12.06	22453	432	0.0192402	0.0151097	6298	142	0.0225468	0.168125	29325	0.0177818	0.703472	1.05104	12848	402	0.0312889	0.264874	2932	84	0.0286494	0.634547	16266	0.459126	0.127935	0.89102
005_J11	SPAC9G1.11C	spn4	3054	55	0.0180092	-0.0802819	2338	48	0.0205304	0.0329588	5495	-0.0459048	0.573602	1.06545	1751	84	0.0479726	0.881433	726	15	0.0206612	0.162964	2576	0.835101	0.148267	0.929767
005_J12	SPAC26A3.01	sxa1	9487	151	0.0159165	-0.258489	11997	235	0.0195882	-0.0348136	21870	-0.134319	0.647284	1.05234	5044	168	0.0333069	0.355044	4822	84	0.0174202	-0.0831992	10118	0.189153	0.609847	1.03326
005_J13	SPBC14C8.17C	spt8	4141	58	0.0140063	-0.44294	1742	34	0.0195178	-0.0400105	5975	-0.334575	0.120033	0.868309	2163	49	0.0226537	-0.201029	746	14	0.0187668	0.0242225	2972	-0.048905	0.546207	1.03958
005_J15	SPBC17A3.03C	SPBC17A3.03C	8456	153	0.0180937	-0.073529	1329	18	0.013544	-0.567145	9956	-0.174304	0.380831	1.05363	5642	192	0.0340305	0.38605	675	20	0.0296296	0.683084	6529	0.583019	0.184453	0.979187
005_J16	SPAC5H10.04	SPAC5H10.04	3458	71	0.0205321	0.108868	908	16	0.0176211	-0.187493	4453	0.0150465	0.680685	1.06176	1737	72	0.0414508	0.670622	472	7	0.0148305	-0.315389	2288	0.674726	0.309499	1.01384
005_J18	SPCC794.03	SPCC794.03	17979	303	0.016853	-0.176008	15845	316	0.0199432	-0.00890376	34443	-0.107765	0.860336	1.02319	7379	264	0.0357772	0.458263	5477	107	0.0195362	0.0821962	13227	0.365244	0.253858	1.00018
005_J19	SPBC3B8.07C	dsd1	18600	286	0.0153763	-0.308301	15933	283	0.0177619	-0.176017	35102	-0.259204	0.351915	1.05809	10897	166	0.0152336	-0.773525	6237	100	0.0160333	-0.202881	17400	-0.529169	0.196559	0.975974
005_J21	SPBC947.01	alf1	18215	313	0.0171836	-0.147978	29985	597	0.01991	-0.0113107	49110	-0.0628234	0.871693	1.0251	15307	326	0.0212974	-0.290097	19585	376	0.0191984	0.0570267	35594	-0.155159	0.976063	1.00479
005_J22	SPAC17A5.10	SPAC17A5.10	42410	725	0.017095	-0.155437	28159	527	0.0187152	-0.100594	71821	-0.152529	0.78241	1.03904	33388	614	0.0183898	-0.501868	15988	220	0.0137603	-0.423443	50210	-0.407496	0.491984	1.03805
005_J23	SPCC1753.03C	rec7	20742	415	0.0200077	0.0715429	15418	340	0.0220521	0.136118	36915	0.0824252	0.417871	1.06287	17188	300	0.017454	-0.577217	9873	179	0.0181303	-0.0255577	27540	-0.339923	0.549428	1.03755
005_J24	SPAC22F8.02C	pvg5	1833	43	0.0234588	0.301116	2251	64	0.0284318	0.502705	4191	0.409899	0.389994	1.05674	1045	71	0.0679426	1.38354	1338	50	0.0373692	1.01789	2504	1.18042	0.0248335	0.517721
005_K01	SPAC1F5.10	SPAC1F5.10	10474	260	0.0248234	0.382686	5480	157	0.0286496	0.513716	16371	0.406472	0.0737935	0.743593	5963	281	0.0471239	0.855682	3044	111	0.0364652	0.982563	9399	0.958002	0.0102734	0.330006
005_K02	SPAPB1A10.12C	alo1	10008	248	0.0247802	0.380173	12760	266	0.0208464	0.0549973	23282	0.195104	0.272842	1.0393	7690	313	0.0407022	0.64433	12524	203	0.0162089	-0.187173	20730	0.188283	0.389415	1.01817
005_K03	SPAC25B8.17	SPAC25B8.17	12863	271	0.0210682	0.146052	5862	122	0.020812	0.0526156	19118	0.0899068	0.617668	1.05934	8265	364	0.0440411	0.758074	3025	86	0.0284298	0.623445	11740	0.831146	0.0177009	0.47626
005_K04	SPAC3A12.17C	cys12	3334	98	0.0293941	0.626514	3425	82	0.0239416	0.254719	6939	0.433458	0.214034	0.995667	2905	88	0.0302926	0.218188	2658	66	0.0248307	0.428168	5717	0.305262	0.594324	1.03825
005_K05	SPAC30D11.09	cwf19	12447	463	0.0371977	0.966201	10211	398	0.0389776	0.957844	23519	0.946336	4.13126e-06	0.000542916	10269	794	0.0773201	1.57007	5983	390	0.0651847	1.82058	17436	1.70125	2.68039e-07	0.000210947
005_K06	SPBC211.06	gfh1	11396	214	0.0187785	-0.0199301	13184	212	0.0160801	-0.319525	25006	-0.186288	0.511387	1.05973	7667	216	0.0281727	0.11352	9638	148	0.0153559	-0.265165	17669	-0.090984	0.983206	1.00198
005_K07	SPAC458.04C	dli1	16895	347	0.0205386	0.109326	10132	183	0.0180616	-0.151876	27557	-0.00806578	0.819984	1.03243	10956	330	0.0301205	0.209967	5707	167	0.0292623	0.665087	17160	0.412864	0.155997	0.933611
005_K08	SPBC651.10	nse5	4044	62	0.0153314	-0.312528	5120	75	0.0146484	-0.454054	9301	-0.39953	0.077841	0.750797	3656	123	0.0336433	0.369543	3021	88	0.0291294	0.658521	6888	0.496238	0.258568	1.0049
005_K09	SPAC9E9.05	SPAC9E9.05	22312	437	0.0195859	0.0408	31954	547	0.0171184	-0.229256	55250	-0.121047	0.899479	1.01756	9837	210	0.021348	-0.286678	11125	204	0.0183371	-0.00919302	21376	-0.181879	0.832116	1.01886
005_K10	SPBC543.03C	pku80	9664	184	0.0190397	0	12031	213	0.0177043	-0.180704	22092	-0.10788	0.739662	1.05038	7274	226	0.0310696	0.254724	12872	304	0.0236172	0.355878	20676	0.231765	0.323751	1.01208
005_K11	SPBC16A3.03C	ppr7	14412	290	0.0201221	0.0797689	39014	677	0.0173527	-0.209637	54393	-0.123683	0.886088	1.02371	8683	202	0.0232638	-0.162688	21491	367	0.0170769	-0.111909	30743	-0.248611	0.769413	1.01898
005_K14	SPAC30C2.02	mmd1	7619	254	0.0333377	0.808142	14427	431	0.0298745	0.574116	22731	0.65593	0.0013044	0.0632934	6489	389	0.0599476	1.20292	10821	303	0.0280011	0.601527	18002	0.835433	0.00765304	0.297429
005_K15	SPBC428.03C	pho4	13655	241	0.0176492	-0.10941	15250	251	0.016459	-0.285923	29397	-0.212318	0.460921	1.05881	9448	274	0.0290008	0.155318	8000	139	0.017375	-0.0869439	17861	0.0793466	0.634176	1.01856
005_K16	SPAC4F10.13C	mpd2	1994	48	0.0240722	0.338356	2423	60	0.0247627	0.303367	4525	0.310236	0.56856	1.06297	1909	60	0.0314301	0.271368	2121	63	0.029703	0.68665	4153	0.446073	0.462686	1.04561
005_K17	SPBP26C9.02C	car1	16127	267	0.0165561	-0.201652	1307	23	0.0175976	-0.189426	17724	-0.245507	0.307346	1.05024	13236	273	0.0206256	-0.336344	8074	149	0.0184543	0	21732	-0.178021	0.845659	1.0188
005_K19	SPCC24B10.20	SPCC24B10.20	12492	221	0.0176913	-0.105972	31222	577	0.0184806	-0.118792	44512	-0.111363	0.904203	1.01598	9717	261	0.0268601	0.0446895	40351	475	0.0117717	-0.648634	50804	-0.607917	0.189601	0.983304
005_K20	SPCC553.03	pex1	12567	213	0.0169492	-0.1678	19738	379	0.0192015	-0.0635786	32897	-0.105817	0.856233	1.02722	6188	153	0.0247253	-0.0747909	11194	175	0.0156334	-0.239328	17710	-0.247632	0.636433	1.01597
005_K21	SPCC663.08C	SPCC663.08C	17339	278	0.0160332	-0.247949	107	3	0.0280374	0.482551	17727	-0.291983	0.220333	0.998465	10745	245	0.0228013	-0.191661	16386	202	0.0123276	-0.582065	27578	-0.443401	0.363775	1.00895
005_K22	SPAC10F6.05C	ubc6	11663	219	0.0187773	-0.0200215	9272	176	0.0189819	-0.0801777	21330	-0.063721	0.886012	1.02437	6032	109	0.0180703	-0.527158	6782	102	0.0150398	-0.29517	13025	-0.444211	0.253411	0.999672
005_K23	SPAC11D3.10	SPAC11D3.10	19769	397	0.0200819	0.0768857	26796	525	0.0195925	-0.0345009	47487	0.00586401	0.605626	1.06355	18470	384	0.0207905	-0.324855	19242	331	0.017202	-0.101384	38427	-0.240814	0.830735	1.01876
005_L01	SPAC1B3.16C	vht1	15621	373	0.0238781	0.326675	10064	216	0.0214626	0.0970268	26274	0.217685	0.200136	1.00036	12862	398	0.0309439	0.248876	5989	124	0.0207046	0.165996	19373	0.305675	0.241556	0.99401
005_L02	SPCC548.05C	dbl5	11155	213	0.0190946	0.00414951	9417	225	0.023893	0.251785	21010	0.110592	0.518768	1.05903	9876	321	0.032503	0.319797	5908	138	0.0233582	0.33997	16243	0.376298	0.199139	0.976464
005_L03	SPAC227.06	SPAC227.06	10857	215	0.0198029	0.0566977	10003	220	0.0219934	0.13227	21295	0.0806195	0.605952	1.06353	6959	200	0.0287398	0.142271	5952	154	0.0258737	0.487527	13265	0.291415	0.349904	1.00227
005_L04	SPCC70.04C	SPCC70.04C	13858	229	0.0165248	-0.204385	5090	98	0.0192534	-0.0596846	19275	-0.192412	0.446132	1.06437	8882	145	0.0163252	-0.673681	3210	58	0.0180685	-0.0304772	12295	-0.416307	0.278585	1.02933
005_L05	SPAC31G5.09C	spk1	10432	249	0.0238689	0.326117	13453	241	0.0179142	-0.163695	24375	0.0570201	0.632789	1.05376	6571	193	0.0293715	0.173639	8134	119	0.0146299	-0.335032	15017	-0.0784943	0.95752	1.00309
005_L07	SPAC521.03	SPAC521.03	12635	224	0.0177285	-0.10294	13019	293	0.0225056	0.165481	26171	0.0313237	0.69513	1.05456	8915	202	0.0226584	-0.200729	6734	167	0.0247995	0.426356	16018	0.0738169	0.681606	1.02322
005_L09	SPAC637.03	SPAC637.03	16586	281	0.016942	-0.168409	8200	174	0.0212195	0.0805908	25241	-0.103316	0.793399	1.03661	10454	274	0.0262101	0.00934337	5597	132	0.0235841	0.353855	16457	0.175083	0.475602	1.04334
005_L10	SPAP27G11.14C	SPAP27G11.14C	18146	264	0.0145487	-0.388127	9101	187	0.0205472	0.0341406	27698	-0.252627	0.343964	1.04919	9843	203	0.0206238	-0.336468	4143	63	0.0152064	-0.279281	14252	-0.236291	0.60114	1.03466
005_L11	SPAP27G11.02	SPAP27G11.02	11588	215	0.0185537	-0.0373083	13557	249	0.0183669	-0.127693	25609	-0.0958035	0.825084	1.03307	6894	156	0.0226284	-0.202645	7008	77	0.0109874	-0.748101	14135	-0.418696	0.297203	1.01585
005_L12	SPBC12C2.04	SPBC12C2.04	22057	374	0.0169561	-0.167212	17165	331	0.0192834	-0.0574393	39927	-0.133697	0.791505	1.03758	13295	371	0.0279052	0.099758	7624	119	0.0156086	-0.241615	21409	0.0642344	0.60924	1.0339
005_L13	SPBC15D4.09C	SPBC15D4.09C	22814	361	0.0158236	-0.266934	28158	484	0.0171887	-0.223338	51817	-0.25041	0.404761	1.06562	15327	300	0.0195733	-0.41189	19396	246	0.012683	-0.541058	35269	-0.510724	0.290646	1.02458
005_L14	SPAC212.01C	SPAC212.01C	7017	125	0.0178139	-0.0960116	17331	316	0.0182332	-0.138231	24789	-0.122681	0.719058	1.05288	4572	100	0.0218723	-0.251675	11554	154	0.0133287	-0.469419	16380	-0.508294	0.211365	0.987205
005_L15	SPBC18H10.20C	any1	10592	185	0.017466	-0.124463	24568	401	0.016322	-0.297979	35746	-0.242691	0.398435	1.06137	6308	136	0.0215599	-0.272425	10381	117	0.0112706	-0.711394	16942	-0.563494	0.162036	0.948121
005_L16	SPBC1604.12	SPBC1604.12	12393	203	0.0163802	-0.217059	10827	190	0.0175487	-0.193435	23613	-0.220495	0.404789	1.06481	7454	262	0.0351489	0.432703	4809	61	0.0126845	-0.540885	12586	0.233489	0.456465	1.04734
005_L17	SPBC29A10.06C	ely5	19137	320	0.0167215	-0.187306	23431	410	0.0174982	-0.197595	43298	-0.20153	0.550076	1.0566	10449	215	0.0205761	-0.339806	21854	266	0.0121717	-0.600428	32784	-0.589365	0.190328	0.980609
005_L18	SPCC794.09C	tef101	4077	100	0.0245278	0.365407	7279	226	0.0310482	0.62971	11682	0.54176	0.0388102	0.588496	3402	88	0.0258671	-0.00965707	3128	84	0.0268542	0.541192	6702	0.23352	0.671869	1.02672
005_L19	SPBC3B9.15C	scp1	8834	167	0.0189042	-0.010304	10902	228	0.0209136	0.0596403	20131	0.0213663	0.827758	1.03192	4425	118	0.0266667	0.03426	3504	85	0.024258	0.394503	8132	0.192535	0.681738	1.02293
005_L20	SPAC11D3.05	mfs2	19749	325	0.0164565	-0.210353	19262	355	0.0184301	-0.122739	39691	-0.178003	0.621666	1.05871	10818	185	0.0171011	-0.606686	8183	93	0.011365	-0.699356	19279	-0.614724	0.13104	0.892887
005_L21	SPBC947.09	hsp3103	16034	290	0.0180866	-0.0740949	12258	236	0.0192527	-0.0597374	28818	-0.0849881	0.900222	1.01731	7139	120	0.0168091	-0.631537	5768	90	0.0156033	-0.242103	13117	-0.461498	0.234696	0.990379
005_L22	SPAC17H9.09C	ras1	4699	72	0.0153224	-0.31337	13534	227	0.0167726	-0.258697	18532	-0.266063	0.270845	1.04176	2365	58	0.0245243	-0.0865647	5904	89	0.0150745	-0.291844	8416	-0.333702	0.322324	1.01366
005_L23	SPCC24B10.11C	mft1	8166	204	0.0249816	0.391854	5196	123	0.0236721	0.238384	13689	0.311498	0.212822	0.995904	6244	248	0.0397181	0.60902	3758	118	0.0313997	0.766793	10368	0.707822	0.0513475	0.670713
005_L24	SPAC22F8.05	SPAC22F8.05	34408	713	0.0207219	0.122145	18051	369	0.0204421	0.0267414	53541	0.0647815	0.382988	1.0559	19542	361	0.018473	-0.495357	9437	165	0.0174844	-0.077891	29505	-0.303679	0.637954	1.01531
005_M01	SPAC227.07C	pab1	3155	85	0.0269414	0.500809	468	9	0.0192308	-0.0613842	3717	0.395819	0.450338	1.06474	3328	143	0.0429688	0.72251	2349	86	0.0366113	0.988333	5906	0.848413	0.0502922	0.670846
005_M03	SPAC25H1.04	mug105	20162	394	0.0195417	0.0375435	10501	260	0.0247595	0.303184	31317	0.113135	0.378942	1.05581	15178	510	0.0336013	0.367738	5996	164	0.0273516	0.567667	21848	0.506721	0.0686041	0.712759
005_M04	SPAC3C7.02C	pil2	10005	280	0.027986	0.555692	4516	108	0.023915	0.253113	14909	0.438259	0.0647448	0.721573	8158	367	0.0449865	0.788715	2494	59	0.0236568	0.358297	11078	0.835996	0.018979	0.466765
005_M05	SPAC31G5.12C	maf1	10319	199	0.0192848	0.0184519	13374	224	0.0167489	-0.260733	24116	-0.14346	0.64071	1.0547	6998	205	0.0292941	0.169832	7725	150	0.0194175	0.0733988	15078	0.106014	0.635506	1.01655
005_M06	SPBC30D10.16	pha2	8661	199	0.0229766	0.27115	4835	134	0.0277146	0.465845	13829	0.323334	0.19266	0.991274	6007	155	0.0258032	-0.0132258	2734	47	0.0171909	-0.102309	8943	0.0447516	0.954469	1.00423
005_M07	SPAC688.06C	slx4	20962	377	0.0179849	-0.0822253	12613	249	0.0197415	-0.0235664	34201	-0.0808815	0.965097	1.00625	13764	303	0.0220139	-0.242359	6638	125	0.018831	0.0291507	20830	-0.0948333	0.973245	1.00518
005_M08	SPBC6B1.08C	ofd1	7737	132	0.0170609	-0.158322	5388	92	0.017075	-0.232917	13349	-0.208475	0.349346	1.05641	4795	110	0.0229406	-0.182877	2999	68	0.0226742	0.297096	7972	0.0277079	0.967258	1.00294
005_M09	SPAPB24D3.07C	SPAPB24D3.07C	14754	283	0.0191812	0.0106825	10044	194	0.019315	-0.0550779	25275	-0.0358913	0.954335	1.0121	9836	248	0.0252135	-0.046581	4985	139	0.0278837	0.595463	15208	0.220957	0.420417	1.04047
005_M10	SPCC74.09	mug24	8135	168	0.0206515	0.117234	5506	101	0.0183436	-0.129522	13910	0	0.960208	1.00782	4789	133	0.027772	0.0928525	2702	59	0.0218357	0.24273	7683	0.194143	0.699224	1.02475
005_M11	SPBC16E9.12C	pab2	23106	470	0.020341	0.0953798	16327	321	0.0196607	-0.0294871	40224	0.0246175	0.580509	1.06697	15413	356	0.0230974	-0.173048	8085	153	0.0189239	0.0362551	24007	-0.0486058	0.822669	1.01919
005_M12	SPCC622.12C	gdh1	13380	243	0.0181614	-0.0681352	10659	239	0.0224224	0.160138	24521	0.0239995	0.744643	1.04895	9128	330	0.0361525	0.473318	5284	114	0.0215746	0.225375	14856	0.459556	0.14086	0.908659
005_M13	SPBC32F12.05C	cwf12	17941	390	0.0217379	0.1912	17243	332	0.0192542	-0.0596282	35906	0.0574226	0.502452	1.05228	10819	332	0.0306868	0.236839	8678	211	0.0243144	0.397852	20040	0.313967	0.225489	0.988632
005_M14	SPAC959.04C	omh6	10460	166	0.01587	-0.262713	16919	344	0.0203322	0.0189636	27889	-0.0822293	0.901106	1.01612	6544	182	0.0278117	0.0949163	11585	217	0.0187311	0.0214802	18528	-0.0256441	0.851035	1.01672
005_M15	SPBC428.11	met17	18898	367	0.01942	0.0285331	19170	369	0.0192488	-0.0600302	38804	-0.0285298	0.7902	1.03845	11697	224	0.0191502	-0.443417	14485	204	0.0140835	-0.389947	26610	-0.454698	0.341455	1.00364
005_M16	SPAC5H10.06C	adh4	10970	187	0.0170465	-0.159539	21284	450	0.0211426	0.075355	32891	0.00215852	0.72263	1.05322	7888	234	0.0296653	0.188	11565	223	0.0192823	0.0633216	19910	0.068468	0.622434	1.0232
005_M17	SPCC1223.04C	set11	11797	223	0.0189031	-0.0103897	20965	442	0.0210828	0.0712629	33427	0.0416741	0.576397	1.06688	8603	179	0.0208067	-0.32373	18063	376	0.020816	0.173738	27221	-0.106247	0.922441	1.00688
005_M18	SPBC3B9.11C	ctf1	12379	221	0.0178528	-0.0928618	19048	392	0.0205796	0.0364135	32040	-0.0157742	0.798701	1.03582	8113	239	0.0294589	0.177926	12340	179	0.0145057	-0.34734	20871	-0.132543	0.939276	1.00539
005_M19	SPCC306.08C	SPCC306.08C	12744	327	0.0256591	0.430459	8025	175	0.0218069	0.119981	21271	0.293599	0.136561	0.893594	8645	289	0.0334297	0.360354	6098	135	0.0221384	0.262595	15167	0.360301	0.22958	0.988668
005_M20	SPCC576.02	SPCC576.02	11107	218	0.0196273	0.0438455	28098	457	0.0162645	-0.303074	39880	-0.195807	0.559254	1.06003	8672	281	0.0324031	0.315356	18944	234	0.0123522	-0.579189	28131	-0.264665	0.71369	1.02495
005_M21	SPCC737.07C	SPCC737.07C	16026	334	0.0208411	0.13042	33493	613	0.0183023	-0.132773	50466	-0.0442745	0.788846	1.03884	8950	261	0.029162	0.163313	24138	349	0.0144585	-0.352036	33698	-0.281232	0.712982	1.02628
005_M22	SPAC10F6.15	SPAC10F6.15	12399	234	0.0188725	-0.0127286	16821	354	0.0210451	0.0686852	29808	0.0292032	0.657161	1.05588	8359	233	0.0278741	0.0981502	10865	167	0.0153705	-0.263797	19624	-0.106642	0.98061	1.00291
005_M23	SPAC212.04C	SPAC212.04C	16111	375	0.023276	0.289831	13987	306	0.0218775	0.124644	30779	0.19833	0.197601	0.997173	14540	489	0.0336314	0.36903	16786	258	0.01537	-0.263844	32073	0.0900142	0.456784	1.04655
005_M24	SPAC186.05C	SPAC186.05C	19483	389	0.0199661	0.0685409	23454	493	0.0210199	0.066953	43819	0.0589005	0.44406	1.06426	16810	555	0.0330161	0.342391	18671	344	0.0184243	-0.00234747	36380	0.177541	0.292634	1.0213
005_N01	SPAC1D4.02C	SPAC1D4.02C	10848	326	0.0300516	0.658429	9267	226	0.0243876	0.281348	20667	0.47674	0.0214476	0.439258	9257	367	0.0396457	0.606386	5589	161	0.0288066	0.642442	15374	0.66673	0.0372454	0.583326
005_N03	SPAC23H3.05C	swd1	2279	79	0.0346643	0.864438	2815	90	0.0319716	0.671989	5263	0.750496	0.0315492	0.54375	1703	117	0.0687023	1.39958	1352	59	0.0436391	1.24166	3231	1.3626	0.0044976	0.228362
005_N04	SPCC736.04C	gma12	8709	156	0.0179125	-0.0880464	8293	157	0.0189316	-0.0840021	17315	-0.0991986	0.70047	1.05004	6061	264	0.0435572	0.742133	4660	89	0.0190987	0.0495185	11074	0.555495	0.11652	0.869204
005_N05	SPAC3C7.03C	rad55	2725	72	0.026422	0.472727	3319	102	0.0307321	0.614948	6218	0.545855	0.116832	0.867029	1927	68	0.035288	0.438401	2304	68	0.0295139	0.677437	4367	0.520803	0.343997	1.00176
005_N06	SPCC645.08C	snd1	8723	174	0.0199473	0.0671776	8396	165	0.0196522	-0.0301087	17458	0.00603008	0.935539	1.01259	5948	127	0.0213517	-0.286426	5451	82	0.0150431	-0.294854	11608	-0.289138	0.453383	1.04945
005_N07	SPAC56F8.05C	mug64	12845	260	0.0202413	0.0882913	7511	157	0.0209027	0.058887	20773	0.0549365	0.699788	1.05152	9951	361	0.0362778	0.478308	5242	105	0.0200305	0.118243	15659	0.45319	0.137792	0.907467
005_N08	SPBC1105.01	SPBC1105.01	5831	121	0.0207512	0.124178	3561	96	0.0269587	0.425951	9609	0.228534	0.496624	1.04983	5222	151	0.0289161	0.151097	2863	58	0.0202585	0.134568	8294	0.20645	0.64747	1.02014
005_N09	SPAC644.11C	pkp1	10049	159	0.0158225	-0.267039	8498	154	0.0181219	-0.147066	18860	-0.22468	0.36158	1.05595	7576	200	0.0263992	0.0197143	5191	88	0.0169524	-0.122466	13055	0.00991576	0.892526	1.01359
005_N10	SPBC19C2.13C	ctu2	5216	99	0.0189801	-0.00452875	8558	173	0.020215	0.0106258	14046	0.00200231	0.970415	1.00548	4069	112	0.0275252	0.0799751	5659	127	0.0224421	0.282253	9967	0.133062	0.727013	1.0208
005_N11	SPAPB1A10.05	SPAPB1A10.05	16290	253	0.015531	-0.293863	8223	170	0.0206737	0.0429974	24936	-0.192546	0.492083	1.05365	11563	231	0.0199775	-0.3824	5496	59	0.0107351	-0.781624	17349	-0.398214	0.360392	1.00935
005_N12	SPBC16E9.07	mug100	7983	153	0.0191657	0.00951533	13539	289	0.0213457	0.0891476	21964	0.0585775	0.666339	1.0561	5108	157	0.0307361	0.239157	8402	216	0.0257082	0.47827	13883	0.301414	0.323607	1.01264
005_N13	SPBC1683.08	ght4	18150	348	0.0191736	0.0101044	7403	145	0.0195867	-0.0349297	26046	-0.0315618	0.927773	1.01675	13873	293	0.0211202	-0.302157	4821	108	0.022402	0.27967	19095	-0.0627066	0.92618	1.004
005_N14	SPAC22A12.17C	SPAC22A12.17C	17834	259	0.0145228	-0.390692	14265	228	0.0159832	-0.328247	32586	-0.378263	0.124808	0.880635	13875	247	0.0178018	-0.548754	9532	176	0.0184641	0.000767733	23830	-0.310016	0.580353	1.03981
005_N15	SPBC19C7.08C	SPBC19C7.08C	13117	198	0.0150949	-0.334951	10960	234	0.0213504	0.0894601	24509	-0.136281	0.668944	1.05916	10450	272	0.0260287	-0.000673745	8559	136	0.0158897	-0.215864	19417	-0.061847	0.918787	1.0106
005_N16	SPBC3H7.12	rav2	15585	219	0.014052	-0.438241	18224	319	0.0175044	-0.197084	34347	-0.309458	0.235488	1.01605	13200	219	0.0165909	-0.650385	15941	179	0.0112289	-0.716739	29539	-0.714015	0.0880528	0.772117
005_N17	SPBC2G2.09C	crs1	10263	182	0.0177336	-0.102527	14447	295	0.0204195	0.0251444	25187	-0.0307625	0.936239	1.01265	7404	230	0.0310643	0.25448	10002	168	0.0167966	-0.135784	17804	0.0294502	0.741259	1.02256
005_N18	SPCPB16A4.02C	SPCPB16A4.02C	13452	236	0.0175439	-0.118047	10601	191	0.0180172	-0.155428	24480	-0.151638	0.616981	1.06105	8977	153	0.0170436	-0.611551	7339	106	0.0144434	-0.353548	16575	-0.497069	0.224782	0.989671
005_N19	SPBC651.03C	gyp10	14517	241	0.0166012	-0.197724	14114	292	0.0206887	0.0440408	29164	-0.0830993	0.910974	1.01455	8295	100	0.0120555	-1.11109	10401	163	0.0156716	-0.235807	18959	-0.6714	0.0930996	0.78363
005_N21	SPBP23A10.16	sdh4	13606	262	0.0192562	0.0163104	17392	417	0.0239765	0.256823	31677	0.15158	0.282117	1.03345	9939	196	0.0197203	-0.401096	13682	238	0.0173951	-0.0852744	24055	-0.286108	0.631903	1.01907
005_N22	SPAC1952.12C	csn71	14804	402	0.0271548	0.512195	8718	160	0.0183528	-0.128798	24084	0.276903	0.133289	0.890661	12485	357	0.0285943	0.134951	6782	123	0.0181362	-0.0250812	19747	0.153169	0.461831	1.04518
005_N23	SPCC285.13C	nup60	27711	653	0.0235646	0.307611	14107	328	0.0232509	0.212484	42799	0.250472	0.0796702	0.759154	23175	724	0.0312406	0.262643	14682	274	0.0186623	0.0161705	38855	0.234746	0.211852	0.985097
005_N24	SPAC23D3.04C	gpd2	13231	267	0.0201799	0.0839042	14400	356	0.0247222	0.301008	28254	0.193288	0.226024	1.00832	11380	366	0.0321617	0.304566	10956	222	0.0202629	0.134882	22924	0.232712	0.299685	1.01551
005_O01	SPAC22H12.01C	mug35	8748	227	0.0259488	0.446654	11026	260	0.0235806	0.232801	20261	0.32066	0.115104	0.872688	7377	283	0.0383625	0.558918	6671	169	0.0253335	0.457091	14500	0.522225	0.101689	0.82081
005_O07	SPAC688.11	end4	1986	21	0.010574	-0.84849	12592	229	0.0181861	-0.141961	14828	-0.201521	0.38007	1.05616	12389	415	0.0334975	0.363274	8763	202	0.0230515	0.320902	21769	0.380743	0.147413	0.926257
005_O08	SPCC126.01C	SPCC126.01C	9193	175	0.0190362	-0.00026613	317	4	0.0126183	-0.669284	9689	-0.0672144	0.64077	1.05425	7308	197	0.0269568	0.0498696	222	5	0.0225225	0.287412	7732	0.2599	0.572074	1.03798
005_O09	SPBC11B10.02C	his3	18382	370	0.0201284	0.0802181	10091	192	0.0190269	-0.0767635	29035	0.00131886	0.7671	1.04421	14423	364	0.0252375	-0.0452103	7882	143	0.0181426	-0.0245753	22812	0.0208851	0.681993	1.02283
005_O10	SPCC1840.06	atp5	7839	128	0.0163286	-0.221611	8064	182	0.0225694	0.16957	16213	-0.0166875	0.958372	1.01026	6916	200	0.0289184	0.151213	5776	129	0.0223338	0.275272	13021	0.210435	0.485558	1.04124
005_O11	SPBC16E9.17C	rem1	15509	281	0.0181185	-0.0715489	10309	178	0.0172665	-0.216828	26277	-0.14954	0.640261	1.05506	13346	316	0.0236775	-0.13726	8669	152	0.0175337	-0.073823	22483	-0.0757118	0.905164	1.01188
005_O12	SPBC1683.03C	SPBC1683.03C	3774	94	0.0249073	0.387553	8081	255	0.0315555	0.653091	12204	0.578075	0.0242305	0.474676	3277	157	0.0479097	0.87954	5843	220	0.0376519	1.02877	9497	0.883725	0.0177192	0.472711
005_O13	SPBC365.08C	SPBC365.08C	13964	291	0.0208393	0.130293	10736	227	0.0211438	0.0754351	25218	0.0887843	0.518731	1.05964	10066	221	0.0219551	-0.246222	8610	176	0.0204413	0.147533	19073	-0.07578	0.956801	1.003
005_O14	SPAC1399.02	SPAC1399.02	7392	155	0.0209686	0.139218	9762	204	0.0208974	0.0585198	17513	0.0857821	0.664962	1.05551	5153	122	0.0236755	-0.137381	5875	156	0.0265532	0.524928	11306	0.17018	0.607424	1.03417
005_O15	SPBC530.14C	dsk1	14562	247	0.016962	-0.166711	18356	417	0.0227174	0.178995	33582	0.0326498	0.60599	1.06301	9773	190	0.0194413	-0.421651	15281	243	0.0159021	-0.214739	25487	-0.374407	0.469228	1.04391
005_O16	SPAP27G11.08C	meu32	12157	204	0.0167805	-0.182232	19568	370	0.0189084	-0.0857717	32299	-0.124226	0.780727	1.03987	8416	245	0.0291112	0.160798	13629	225	0.0165089	-0.160712	22515	-0.0715242	0.894961	1.0138
005_O17	SPCC1450.16C	ptl1	11384	209	0.0183591	-0.052518	10450	260	0.0248804	0.310208	22303	0.123355	0.46053	1.05945	8639	230	0.0266235	0.0319202	6586	138	0.0209535	0.183237	15593	0.10953	0.617151	1.0263
005_O18	SPBC418.02	SPBC418.02	13213	242	0.0183153	-0.0559644	15598	331	0.0212207	0.0806695	29384	0.0122586	0.722812	1.05252	9478	196	0.0206795	-0.332578	11777	166	0.0140953	-0.388746	21617	-0.395546	0.403299	1.03135
005_O19	SPCC306.11	SPCC306.11	10336	196	0.0189628	-0.00583773	23938	439	0.018339	-0.129882	34909	-0.0900147	0.934201	1.01393	7189	185	0.0257338	-0.0171152	16241	262	0.016132	-0.19403	23877	-0.231816	0.748504	1.02004
005_O21	SPCC757.07C	ctt1	13231	279	0.0210868	0.14733	7974	174	0.0218209	0.120911	21658	0.11545	0.4935	1.05454	8431	268	0.0317875	0.28768	4408	109	0.0247278	0.422175	13216	0.390298	0.225867	0.988915
005_O22	SPAC12G12.10	wdr21	13466	356	0.026437	0.473542	14649	308	0.0210253	0.0673275	28779	0.260186	0.122052	0.876883	9946	406	0.0408204	0.648514	18443	260	0.0140975	-0.388519	29055	0.0664567	0.523291	1.03475
005_P01	SPAC1D4.03C	aut12	5428	128	0.0235814	0.308638	16303	366	0.0224499	0.161906	22225	0.2051	0.265791	1.03751	4142	146	0.0352487	0.436791	11814	294	0.0248857	0.431362	16396	0.299671	0.28501	1.03009
005_P02	SPCC576.13	swc5	4849	97	0.0200041	0.0712841	7860	190	0.024173	0.268598	12996	0.195543	0.466027	1.05593	3526	87	0.0246739	-0.0777945	5421	128	0.0236119	0.355556	9162	0.101127	0.824825	1.01865
005_P07	SPAC589.03C	SPAC589.03C	22243	356	0.016005	-0.250488	14416	312	0.0216426	0.109074	37327	-0.113976	0.855238	1.02642	16541	323	0.0195272	-0.41529	8836	214	0.0242191	0.392189	25914	-0.0823329	0.879364	1.01031
005_P08	SPAC22G7.03	SPAC22G7.03	11213	190	0.0169446	-0.168186	12024	250	0.0207917	0.0512105	23677	-0.0585771	0.938886	1.01205	8306	179	0.0215507	-0.273044	7495	175	0.0233489	0.339398	16155	0	0.839421	1.0187
005_P09	SPAC869.10C	put4	8614	148	0.0171813	-0.148171	12237	264	0.0215739	0.104487	21263	0.002871	0.873112	1.02524	6302	203	0.032212	0.306821	7143	225	0.0314994	0.771366	13873	0.506808	0.117052	0.871107
005_P10	SPCC1020.08	SPCC1020.08	25447	466	0.0183126	-0.056179	8912	183	0.0205341	0.0332219	35008	-0.0621263	0.95339	1.0128	18131	418	0.0230544	-0.175733	5152	80	0.015528	-0.249089	23781	-0.0668647	0.867781	1.01139
005_P11	SPAPJ696.01C	vps17	1489	28	0.0188046	-0.0179303	7379	162	0.0219542	0.129696	9058	0.119662	0.82002	1.03206	856	15	0.0175234	-0.571498	4239	150	0.0353857	0.93921	5260	0.531578	0.283817	1.03171
005_P12	SPBC776.16	mis20	6047	163	0.0269555	0.501567	5829	174	0.0298507	0.572966	12213	0.525043	0.0416024	0.593729	4262	161	0.0377757	0.536681	3335	112	0.0335832	0.863783	7870	0.681666	0.0887965	0.774325
005_P13	SPBC1685.07C	avt5	5290	121	0.0228733	0.264654	12066	231	0.0191447	-0.0678553	17708	0.0404842	0.810773	1.03154	3513	107	0.0304583	0.226058	7425	120	0.0161616	-0.191385	11165	-0.11039	0.787559	1.01817
005_P15	SPBC19C7.12C	omh1	13961	211	0.0151135	-0.333173	12208	260	0.0212975	0.0858841	26640	-0.131788	0.705286	1.05027	12444	273	0.0219383	-0.247327	16375	382	0.0233282	0.338121	29474	0.0207411	0.61299	1.02972
005_P16	SPCC1393.03	rps1501	9330	176	0.0188639	-0.013387	11236	276	0.0245639	0.291739	21018	0.156405	0.392902	1.05645	6559	137	0.0208873	-0.318149	7660	191	0.0249347	0.4342	14547	0.0421423	0.782817	1.01873
005_P17	SPBC31A8.01C	rtn1	17615	311	0.0176554	-0.108903	10339	286	0.0276622	0.463118	28551	0.115019	0.401689	1.06286	12780	259	0.020266	-0.361713	8248	188	0.0227934	0.30466	21475	-0.0757703	0.919309	1.00976
005_P18	SPAC23C11.06C	SPAC23C11.06C	20049	329	0.0164098	-0.214456	9875	222	0.022481	0.163906	30475	-0.0989075	0.862578	1.02277	17462	301	0.0172374	-0.595233	7689	243	0.0316036	0.776132	25695	-0.0507426	0.808097	1.02205
005_P19	SPBC660.06	SPBC660.06	19482	327	0.0167847	-0.181865	11282	231	0.0204751	0.0290693	31322	-0.120635	0.786771	1.03784	15617	285	0.0182493	-0.512933	7833	118	0.0150645	-0.292807	23853	-0.382542	0.44286	1.05456
005_P20	SPAC13G6.08	SPAC13G6.08	13137	219	0.0166705	-0.191718	13232	270	0.0204051	0.0241276	26858	-0.0886652	0.865584	1.02249	11403	249	0.0218364	-0.254045	11502	199	0.0173013	-0.0930732	23353	-0.195897	0.824418	1.01895
005_P21	SPBP35G2.13C	swc2	1419	23	0.0162086	-0.232254	16324	572	0.0350404	0.80422	18338	0.765983	0.000507106	0.031361	674	23	0.0341246	0.390036	11191	314	0.0280583	0.604469	12202	0.342303	0.301789	1.01283
005_P22	SPAC19D5.02C	SPAC19D5.02C	772	16	0.0207254	0.122386	19304	371	0.0192188	-0.0622813	20463	-0.032795	0.983944	1.00335	450	12	0.0266667	0.03426	15609	285	0.0182587	-0.015373	16356	-0.276653	0.558097	1.03529
006_A01	SPAC23D3.11	ayr1	9278	216	0.0232809	0.363214	13375	316	0.0236262	0.512858	23185	0.443564	0.0245268	0.477515	5521	280	0.0507155	1.06959	7107	256	0.0360208	0.736575	13164	0.901065	0.00815365	0.291678
006_A04	SPAC1805.16C	SPAC1805.16C	7519	150	0.0199495	0.140419	22155	387	0.0174678	0.0771732	30211	0.0675623	0.523712	1.06156	5347	127	0.0237516	-0.0248066	12698	292	0.0229957	0.089111	18464	0.030809	0.726312	1.02255
006_A05	SPAC6C3.06C	SPAC6C3.06C	781	10	0.0128041	-0.499326	20659	369	0.0178615	0.109322	21819	0.0337326	0.753819	1.04553	657	19	0.0289193	0.259201	12947	279	0.0215494	-0.00460882	13902	-0.0532607	0.988072	1.00111
006_A06	SPAC13G6.02C	rps101	8388	134	0.0159752	-0.180097	17582	288	0.0163804	-0.0155584	26392	-0.0877634	0.863804	1.02192	5663	129	0.0227794	-0.0851009	9899	214	0.0216183	0	15905	-0.044361	0.945159	1.00417
006_A07	SPBC1198.01	fmd2	29927	516	0.017242	-0.0700078	24514	472	0.0192543	0.217653	55429	0.0716571	0.356847	1.06079	20779	523	0.0251696	0.0588512	13796	340	0.0246448	0.189029	35438	0.135089	0.360566	1.00805
006_A08	SPBPB10D8.07C	SPBPB10D8.07C	17329	361	0.0208321	0.202879	13060	247	0.0189127	0.191828	30997	0.212362	0.173294	0.974279	11741	334	0.0284473	0.235459	10997	225	0.0204601	-0.0794411	23297	0.113201	0.489521	1.03912
006_A09	SPBC1773.17C	SPBC1773.17C	23523	513	0.0218084	0.268956	18602	371	0.0199441	0.268433	43009	0.281209	0.0554178	0.677472	14695	520	0.0353862	0.550353	10422	299	0.0286893	0.408257	25936	0.520657	0.0511968	0.671531
006_A10	SPAC14C4.01C	SPAC14C4.01C	16237	263	0.0161976	-0.160153	32445	472	0.0145477	-0.186737	49417	-0.193805	0.592397	1.06221	12355	290	0.0234723	-0.0418757	17506	306	0.0174797	-0.306574	30457	-0.187492	0.911372	1.01128
006_A11	SPBC28F2.02	mep33	19606	393	0.0200449	0.147303	20990	328	0.0156265	-0.0835344	41317	0.0405013	0.518577	1.06001	13118	474	0.0361336	0.580506	13665	435	0.0318332	0.558274	27692	0.578421	0.0311872	0.548476
006_A12	SPAC186.08C	SPAC186.08C	23985	408	0.0170106	-0.0894945	15788	305	0.0193185	0.222453	40486	0.0539523	0.479904	1.05699	15386	452	0.0293774	0.281871	12526	395	0.0315344	0.544671	28759	0.416934	0.0914612	0.780271
006_A13	SPBC3D6.04C	mad1	30623	523	0.0170787	-0.0837359	18248	322	0.0176458	0.0917943	49716	0.00181235	0.610226	1.06393	14374	292	0.0203145	-0.250327	10200	233	0.0228431	0.0795047	25099	-0.0893574	0.904893	1.0123
006_A14	SPAC22G7.07C	ime4	22358	387	0.0173092	-0.0643888	20965	345	0.016456	-0.00891453	44055	-0.0314499	0.767998	1.04273	11555	318	0.0275206	0.187676	12933	319	0.0246656	0.190243	25125	0.194676	0.334758	1.01037
006_A15	SPBC947.15C	nde1	183	6	0.0327869	0.857188	11266	229	0.0203266	0.295844	11684	0.249279	0.377596	1.05767	13505	342	0.025324	0.0676691	6655	193	0.0290008	0.423834	20695	0.223501	0.33554	1.00983
006_A17	SPCC1442.07C	SPCC1442.07C	21036	404	0.0192052	0.0855637	31872	546	0.017131	0.0490833	53858	0.0562813	0.40742	1.06639	15206	357	0.0234776	-0.0415502	15993	470	0.0293879	0.442964	32026	0.221845	0.25306	0.999541
006_A18	SPAC806.04C	SPAC806.04C	23315	382	0.0163843	-0.143617	34837	581	0.0166777	0.0103897	59115	-0.0604534	0.828471	1.03199	16808	442	0.026297	0.122065	19820	425	0.021443	-0.0117502	37495	0.058543	0.48547	1.04176
006_A19	SPCC1840.09	SPCC1840.09	19373	367	0.0189439	0.0658015	39612	732	0.0184792	0.158378	60084	0.109611	0.247777	1.02827	18922	467	0.0246803	0.0305244	16526	432	0.0261406	0.274038	36347	0.158075	0.320914	1.01125
006_A20	SPBC16G5.13	ptf2	16939	388	0.0229057	0.339777	34325	788	0.022957	0.471408	52440	0.40971	0.00647362	0.224371	15550	424	0.0272669	0.174316	17788	475	0.0267034	0.304767	34237	0.246611	0.214089	0.983871
006_A21	SPCC576.17C	SPCC576.17C	116	1	0.00862069	-1.07006	26268	515	0.0196056	0.243738	26900	0.179547	0.265221	1.04173	20308	505	0.024867	0.0414017	16980	438	0.0257951	0.254838	38231	0.154004	0.31935	1.0124
006_A22	SPBC29A10.01	ccr1	1488	22	0.0147849	-0.291802	1503	41	0.0272788	0.720251	3054	0.286564	0.737682	1.05183	1629	49	0.0300798	0.315962	1398	58	0.0414878	0.940432	3134	0.637108	0.285505	1.02717
006_A23	SPCP31B10.05	tdp1	32251	637	0.0197513	0.126018	17934	372	0.0207427	0.325077	51194	0.219438	0.0917505	0.806075	24839	760	0.030597	0.340559	13660	420	0.0307467	0.508176	39679	0.431352	0.0629787	0.700555
006_A24	SPBC359.04C	pfl7	17293	332	0.0191985	0.0850639	38591	729	0.0188904	0.190126	56945	0.136757	0.198606	1.00064	20376	675	0.0331272	0.455183	35838	944	0.0263408	0.285041	57833	0.34156	0.0932665	0.782941
006_B01	SPBC8E4.02C	SPBC8E4.02C	12493	265	0.0212119	0.228941	12180	244	0.0200328	0.274839	25182	0.256572	0.15072	0.921264	10354	385	0.0371837	0.621837	7430	193	0.0259758	0.264911	18362	0.515948	0.0794844	0.742484
006_B02	SPAC977.05C	SPAC977.05C	6682	110	0.0164621	-0.13678	9488	160	0.0168634	0.0263679	16440	-0.0485206	0.853867	1.02751	5408	160	0.0295858	0.292071	5575	143	0.0256502	0.246715	11286	0.279504	0.414545	1.03653
006_B03	SPCC1620.04C	mug55	10753	193	0.0179485	-0.0120696	12674	217	0.0171217	0.0482951	23837	0.0192913	0.771815	1.03941	6848	150	0.0219042	-0.141626	6998	168	0.0240069	0.151191	14164	0.0150154	0.852009	1.01596
006_B04	SPBC1604.20C	tea2	10946	168	0.0153481	-0.237874	11149	205	0.0183873	0.151182	22468	-0.0327047	0.983051	1.00309	7682	152	0.0197865	-0.288316	5310	139	0.026177	0.276045	13283	-0.0211465	0.95571	1.00353
006_B05	SPCC584.16C	SPCC584.16C	7750	113	0.0145806	-0.311877	12063	188	0.0155848	-0.0873841	20114	-0.184844	0.474588	1.05785	5416	112	0.0206795	-0.224634	7295	136	0.0186429	-0.213629	12959	-0.22028	0.606673	1.03513
006_B06	SPBC23E6.03C	nta1	8985	141	0.0156928	-0.205826	6691	140	0.0209236	0.337605	15957	0.0538523	0.806362	1.03259	8291	224	0.0270172	0.161047	4384	109	0.0248631	0.201752	13008	0.208994	0.488412	1.03887
006_B07	SPAC144.11	rps1102	11998	208	0.0173362	-0.0621416	17651	304	0.0172228	0.0567933	30161	0	0.759123	1.04462	11058	237	0.0214324	-0.173037	12409	346	0.027883	0.367129	24050	0.12832	0.453764	1.04802
006_B08	SPBC405.06	SPBC405.06	2314	56	0.0242005	0.419107	6929	158	0.0228027	0.461677	9457	0.423017	0.15453	0.940902	2256	67	0.0296986	0.29756	5043	110	0.0218124	0.0128933	7476	0.0934365	0.91627	1.01137
006_B09	SPBC1734.05C	spf31	13305	512	0.0384818	1.08824	9963	287	0.0288066	0.798871	24067	0.991688	1.25101e-06	0.00018789	7273	239	0.0328613	0.443555	7063	156	0.0220869	0.0309369	14731	0.277668	0.341685	1.00338
006_B11	SPBC215.10	SPBC215.10	7348	180	0.0244965	0.436642	7527	188	0.0249768	0.593058	15243	0.518656	0.0271508	0.500781	6065	156	0.0257214	0.0901329	6032	162	0.0268568	0.313029	12415	0.209835	0.50193	1.03611
006_B12	SPCC1739.05	set5	14361	235	0.0163638	-0.145427	16363	288	0.0176007	0.0881035	31247	-0.0207155	0.825697	1.03343	13518	321	0.0237461	-0.025142	9267	248	0.0267616	0.30791	23354	0.135802	0.447897	1.05301
006_B13	SPAC1B3.01C	SPAC1B3.01C	1694	47	0.027745	0.616296	3151	81	0.0257061	0.634584	4973	0.613415	0.100959	0.83357	1362	24	0.0176211	-0.455526	1732	35	0.0202079	-0.0973401	3153	-0.2533	0.279762	1.02885
006_B14	SPCC794.10	SPCC794.10	15649	295	0.018851	0.0587133	16994	352	0.0207132	0.323022	33290	0.198832	0.180609	0.980446	11562	352	0.0304446	0.333351	11567	260	0.0224777	0.0562408	23741	0.219287	0.311031	1.01674
006_B15	SPAC683.02C	SPAC683.02C	23086	373	0.016157	-0.163774	16478	294	0.017842	0.107747	40231	-0.0346619	0.804512	1.0319	13046	310	0.0237621	-0.0241729	10124	185	0.0182734	-0.24251	23665	-0.0893716	0.92191	1.0077
006_B16	SPCC4B3.06C	SPCC4B3.06C	11174	217	0.0194201	0.101618	17994	305	0.0169501	0.0337652	29690	0.051503	0.581885	1.0664	8746	202	0.0230963	-0.0651735	7889	177	0.0224363	0.0535789	17014	0.00343388	0.814018	1.0193
006_B18	SPBC1773.09C	mug184	8206	139	0.0169388	-0.0955974	16265	299	0.018383	0.150847	24909	0.0516974	0.642762	1.05313	6381	138	0.0216267	-0.16002	7017	182	0.025937	0.262756	13718	0.0715122	0.740224	1.02158
006_B19	SPAC1952.05	gcn5	9330	204	0.021865	0.272689	7046	145	0.0205791	0.313648	16725	0.303484	0.174871	0.97446	11678	389	0.0333105	0.463143	5428	194	0.0357406	0.725308	17689	0.584451	0.0535205	0.679365
006_B20	SPAC1565.03	SPAC1565.03	19053	383	0.0201018	0.151395	20481	364	0.0177726	0.102124	40281	0.129854	0.273455	1.03414	23108	514	0.0222434	-0.119458	14144	359	0.0253818	0.231538	38125	0.0441217	0.510491	1.03479
006_B22	SPAC25B8.09	SPAC25B8.09	15353	234	0.0152413	-0.247943	31948	534	0.0167147	0.0135861	48069	-0.0889247	0.986251	1.00117	17697	485	0.0274058	0.181646	25879	556	0.0214846	-0.00895309	44617	0.0718223	0.433238	1.0483
006_B23	SPAC5H10.12C	SPAC5H10.12C	24660	526	0.0213301	0.236959	34276	622	0.0181468	0.132188	60084	0.173741	0.131363	0.889094	25613	753	0.0293991	0.28294	34371	841	0.0244683	0.178658	61578	0.22546	0.186241	0.983703
006_B24	SPAC589.10C	SPAC589.10C	34812	631	0.0181259	0.00212411	44413	706	0.0158962	-0.0588419	80562	-0.0331886	0.683129	1.05981	29621	923	0.0311603	0.366877	26183	787	0.0300577	0.475477	57514	0.431014	0.0501456	0.674608
006_C01	SPAC23H3.08C	bub3	9299	164	0.0176363	-0.0373829	9990	201	0.0201201	0.281111	19654	0.131958	0.481715	1.05729	5412	180	0.0332594	0.46093	5912	169	0.0285859	0.403049	11673	0.439301	0.201184	0.975852
006_C02	SPCC330.06C	pmp20	10126	199	0.0196524	0.118773	9621	178	0.0185012	0.16009	20124	0.144771	0.438146	1.06876	9135	201	0.0220033	-0.135115	6279	137	0.0218188	0.0133131	15752	-0.0517601	0.965333	1.00293
006_C04	SPAP7G5.04C	lys1	3558	87	0.0244519	0.434018	5562	123	0.0221143	0.417455	9330	0.415123	0.166608	0.967736	4257	115	0.0270143	0.160891	4905	129	0.0262997	0.28279	9406	0.228605	0.561246	1.03625
006_C05	SPAC6F6.02C	pof5	11157	198	0.0177467	-0.0283799	11354	160	0.0140919	-0.232657	22869	-0.118831	0.711154	1.04861	6871	190	0.0276525	0.194574	5891	114	0.0193516	-0.159807	13066	0.0676748	0.765817	1.01936
006_C06	SPAC31G5.04	lys12	6334	92	0.0145248	-0.317414	11502	165	0.0143453	-0.206947	18093	-0.261184	0.277894	1.03358	3894	85	0.0218285	-0.146624	10195	136	0.0133399	-0.696511	14310	-0.535065	0.171269	0.961059
006_C08	SPCC11E10.03	mug1	6798	109	0.0160341	-0.174785	7713	111	0.0143913	-0.202332	14731	-0.187804	0.411439	1.0628	7793	131	0.01681	-0.523517	7763	142	0.0182919	-0.241051	15829	-0.373112	0.382251	1.0112
006_C09	SPBC1861.02	abp2	4737	84	0.0177327	-0.0295155	15029	321	0.0213587	0.367296	20171	0.246741	0.215735	0.996235	3338	136	0.040743	0.753717	8275	234	0.0282779	0.387421	11983	0.487242	0.153629	0.930044
006_C10	SPAC15E1.10	SPAC15E1.10	6057	109	0.0179957	-0.00827838	13724	187	0.0136258	-0.281191	20077	-0.206679	0.415496	1.06543	4861	83	0.0170747	-0.500975	7369	203	0.0275478	0.349683	12516	0.0410486	0.8391	1.01909
006_C11	SPBC28F2.05C	SPBC28F2.05C	11131	183	0.0164406	-0.138671	17386	281	0.0161624	-0.034884	28981	-0.0858578	0.89853	1.01722	8116	209	0.0257516	0.0918286	7672	181	0.0235923	0.126059	16178	0.120104	0.584022	1.03753
006_C12	SPAC18G6.04C	shm2	9759	146	0.0149605	-0.274768	12850	231	0.0179767	0.118596	22986	-0.050493	0.959042	1.00895	9365	248	0.0264816	0.132156	7116	116	0.0163013	-0.40727	16845	-0.0414074	0.918847	1.01031
006_C13	SPBC3D6.06C	prs5	14066	259	0.0184132	0.0248088	16286	282	0.0173155	0.0645348	30893	0.0456766	0.588253	1.06263	11392	159	0.0139572	-0.791828	7959	189	0.0237467	0.135471	19699	-0.337863	0.485822	1.04039
006_C14	SPAC22H12.05C	fsc1	14736	230	0.015608	-0.213642	4753	70	0.0147275	-0.169012	19789	-0.165858	0.525807	1.06307	11960	200	0.0167224	-0.531051	3323	87	0.0261812	0.276273	15570	-0.275419	0.548222	1.03776
006_C15	SPBCPT2R1.01C	SPBCPT2R1.01C	9993	153	0.0153107	-0.241389	12583	179	0.0142255	-0.219044	22908	-0.231767	0.371627	1.05882	5995	149	0.024854	0.0406471	6960	119	0.0170977	-0.338454	13223	-0.135818	0.787789	1.01763
006_C16	SPAC323.01C	pos5	4030	72	0.017866	-0.0187141	3870	58	0.0149871	-0.143809	8030	-0.0695733	0.590511	1.06366	3058	70	0.0228908	-0.078067	2023	53	0.0261987	0.27724	5204	0.0909318	0.951116	1.00305
006_C19	SPCC24B10.10C	yta4	13968	235	0.0168242	-0.105396	25119	406	0.0161631	-0.0348274	39728	-0.0745249	0.96945	1.0058	13071	270	0.0206564	-0.226244	13439	262	0.0194955	-0.149115	27042	-0.179653	0.900975	1.01295
006_C21	SPCC613.03	SPCC613.03	9784	197	0.0201349	0.153768	18710	283	0.0151256	-0.130536	28974	-0.0357841	0.908233	1.01616	8214	205	0.0249574	0.0466335	8826	263	0.0297983	0.462975	17508	0.273041	0.30494	1.01261
006_C22	SPBC29A10.05	exo1	15078	251	0.0166468	-0.120689	34877	579	0.0166012	0.00375933	50785	-0.0556781	0.834908	1.03065	16922	374	0.0221014	-0.128695	21931	436	0.0198805	-0.1209	39663	-0.124646	0.880687	1.00961
006_C23	SPBC11C11.09C	rpl502	2330	72	0.0309013	0.771736	5979	153	0.0255896	0.628027	8534	0.649018	0.0274467	0.503295	1251	73	0.0583533	1.27198	1466	60	0.0409277	0.920821	2850	1.1068	0.0319351	0.549353
006_C24	SPBC3B9.04	SPBC3B9.04	23527	492	0.0209121	0.20841	42070	688	0.0163537	-0.0179113	66777	0.0589248	0.365875	1.06063	23279	649	0.0278792	0.206356	20815	519	0.0249339	0.205855	45262	0.220844	0.211694	0.985818
006_D02	SPAPB8E5.06C	rpl302	9247	161	0.0174111	-0.0559278	1483	35	0.0236008	0.511308	10926	0.0810432	0.866462	1.02238	7121	224	0.0314563	0.380513	711	33	0.0464135	1.10229	8089	0.529774	0.189603	0.981696
006_D03	SPCC1682.14	rpl1902	4201	72	0.0171388	-0.0786671	11729	179	0.0152613	-0.117648	16181	-0.132219	0.580197	1.06764	3029	96	0.0316936	0.391359	6613	176	0.0266142	0.299943	9914	0.31166	0.403523	1.02941
006_D04	SPBC1683.11C	SPBC1683.11C	7182	129	0.0179616	-0.0110177	13604	230	0.0169068	0.0300749	21145	0.000211324	0.884753	1.02517	5949	162	0.0272315	0.172441	6908	158	0.022872	0.0813285	13177	0.130976	0.631293	1.01861
006_D07	SPBC1683.02	SPBC1683.02	24551	442	0.0180033	-0.00766662	14379	257	0.0178733	0.110277	39629	0.0562497	0.478315	1.05571	11384	256	0.0224877	-0.103697	7393	164	0.0221831	0.0372079	19197	-0.0231194	0.833671	1.01918
006_D08	SPBC409.16C	saw1	5815	85	0.0146174	-0.308248	7108	102	0.01435	-0.206474	13110	-0.255063	0.256869	1.04134	3963	111	0.0280091	0.213061	3211	91	0.0283401	0.390588	7376	0.308964	0.501999	1.03558
006_D09	SPAC9E9.13	wos2	21187	368	0.0173691	-0.0594048	23021	319	0.0138569	-0.256922	44895	-0.152158	0.739694	1.04995	7718	160	0.0207308	-0.221061	10305	196	0.0190199	-0.184747	18379	-0.202504	0.742736	1.02146
006_D10	SPBPB2B2.09C	SPBPB2B2.09C	26718	365	0.0136612	-0.405847	36289	516	0.0142192	-0.219689	63888	-0.30453	0.260057	1.04089	15608	296	0.0189646	-0.349522	9212	162	0.0175858	-0.297849	25278	-0.300698	0.612292	1.0313
006_D11	SPBC106.17C	cys2	9656	181	0.0187448	0.0505609	32518	504	0.0154991	-0.0953429	42859	-0.0884102	0.991507	1.00135	5894	175	0.0296912	0.297202	14882	295	0.0198226	-0.12511	21246	-0.00679926	0.76456	1.02114
006_D12	SPCC1919.13C	SPCC1919.13C	13509	239	0.0176919	-0.0328415	34212	512	0.0149655	-0.145887	48472	-0.133972	0.825739	1.03266	9873	243	0.0246126	0.0265623	17204	290	0.0168565	-0.358947	27610	-0.207474	0.840604	1.0166
006_D13	SPAC30D11.02C	SPAC30D11.02C	4309	58	0.0134602	-0.427231	3286	49	0.0149117	-0.151079	7702	-0.293671	0.166885	0.967567	2243	74	0.0329915	0.449262	1661	46	0.0276942	0.357326	4024	0.435467	0.488319	1.04078
006_D14	SPBP35G2.03C	sgo1	36571	591	0.0161603	-0.163473	31110	528	0.016972	0.0356315	68800	-0.0627731	0.820399	1.03171	16887	286	0.0169361	-0.512731	9641	211	0.0218857	0.0177322	27025	-0.278812	0.673606	1.02688
006_D15	SPBC2A9.02	SPBC2A9.02	12414	222	0.017883	-0.0173396	18102	285	0.0157441	-0.0727152	31023	-0.0557405	0.963978	1.00642	9278	192	0.0206941	-0.223613	11062	220	0.0198879	-0.120365	20752	-0.166217	0.859537	1.01304
006_D16	SPAC10F6.12C	mam4	12296	235	0.0191119	0.0785405	11400	192	0.0168421	0.0245444	24123	0.0614322	0.621923	1.05858	9368	239	0.0255124	0.0783641	6446	152	0.0235805	0.125339	16205	0.121424	0.580886	1.0384
006_D17	SPAC12B10.11	exg2	11523	164	0.0142324	-0.346752	13259	227	0.0171204	0.0481923	25173	-0.130284	0.696351	1.05338	11435	232	0.0202886	-0.252165	10289	182	0.0176888	-0.28942	22138	-0.254201	0.680149	1.02445
006_D18	SPBC1921.07C	sgf29	14826	252	0.0169972	-0.0906369	25616	399	0.0155762	-0.0881845	41093	-0.101357	0.928467	1.0161	15684	304	0.0193828	-0.318056	9803	212	0.021626	0.000512936	26003	-0.166933	0.920909	1.00871
006_D19	SPAC1A6.08C	mug125	20676	302	0.0146063	-0.30934	36065	524	0.0145293	-0.188561	57567	-0.24641	0.420709	1.06323	9163	160	0.0174615	-0.468654	11302	158	0.0139798	-0.62891	20783	-0.548674	0.194788	0.982681
006_D20	SPAC1610.01	saf5	17611	290	0.016467	-0.136355	25670	504	0.0196338	0.245812	44075	0.0872448	0.359667	1.06018	16569	302	0.0182268	-0.406772	11172	224	0.0200501	-0.108645	28267	-0.261499	0.721853	1.02176
006_D22	SPAC25G10.05C	his1	24677	398	0.0161284	-0.16633	32391	577	0.0178136	0.10545	58043	-0.0154401	0.645863	1.05165	18994	444	0.0233758	-0.0478176	15931	305	0.0191451	-0.175284	35674	-0.0838365	0.803933	1.02089
006_D23	SPAC630.04C	SPAC630.04C	27315	558	0.0204283	0.174641	32266	575	0.0178206	0.106019	60714	0.139063	0.186316	0.981037	17755	492	0.0277105	0.197599	19768	436	0.0220558	0.0289051	38451	0.121808	0.368784	1.01039
006_E01	SPAC25B8.01	dap1	10875	200	0.0183908	0.0230534	18101	334	0.018452	0.156251	29510	0.0938209	0.45108	1.06251	8099	271	0.0334609	0.469644	10141	296	0.0291884	0.433141	18807	0.451701	0.114017	0.862799
006_E02	SPCC550.10	atd3	9358	184	0.0196623	0.119502	8236	136	0.0165129	-0.00393715	17914	0.074828	0.691402	1.05653	7070	224	0.0316832	0.390883	4484	97	0.0216325	0.000942369	11875	0.289639	0.383709	1.0125
006_E03	SPAC4G8.10	gos1	9285	216	0.0232633	0.362126	6817	119	0.0174564	0.0762246	16437	0.268761	0.232759	1.01538	8974	259	0.0288612	0.256295	3886	109	0.0280494	0.375714	13228	0.332273	0.294509	1.01435
006_E04	SPAC13G6.06C	gcv2	2342	51	0.0217763	0.266825	4870	93	0.0190965	0.205781	7356	0.209437	0.645743	1.05254	1466	40	0.0272851	0.175281	1872	60	0.0320513	0.568126	3438	0.398402	0.595714	1.0378
006_E05	SPAC6F6.11C	SPAC6F6.11C	14084	294	0.0208748	0.205828	34878	576	0.0165147	-0.00377657	49832	0.0411925	0.47104	1.05591	8011	145	0.0181001	-0.416835	13262	264	0.0199065	-0.119017	21682	-0.241465	0.702492	1.0224
006_E06	SPBC16G5.11C	bag101	13129	241	0.0183563	0.0203449	16943	248	0.0146373	-0.177877	30561	-0.0867467	0.910398	1.01499	5028	116	0.0230708	-0.0667653	4130	112	0.0271186	0.327029	9386	0.131387	0.752571	1.01897
006_E07	SPBC1683.07	mal1	19603	380	0.0193848	0.0989938	37918	616	0.0162456	-0.0274806	58517	0.00389662	0.570425	1.06394	10580	317	0.0299622	0.31031	9905	186	0.0187784	-0.203182	20988	0.111448	0.521445	1.035
006_E08	SPCC23B6.02C	SPCC23B6.02C	17527	273	0.015576	-0.216609	21600	295	0.0136574	-0.277844	39695	-0.250434	0.386764	1.05615	9202	191	0.0207564	-0.21928	6621	123	0.0185773	-0.218719	16137	-0.195801	0.719624	1.0209
006_E09	SPBC1861.06C	mug131	20621	358	0.0173609	-0.0600859	27193	392	0.0144155	-0.19991	48564	-0.138703	0.806503	1.03235	15081	304	0.0201578	-0.261494	12450	250	0.0200803	-0.106474	28085	-0.175713	0.919897	1.009
006_E10	SPAC16C9.01C	SPAC16C9.01C	20859	384	0.0184093	0.0245051	40706	647	0.0158945	-0.0590038	62596	-0.0442983	0.751778	1.04638	13276	337	0.0253842	0.0710945	17020	268	0.0157462	-0.457254	30901	-0.186734	0.91654	1.01025
006_E11	SPBC2G5.02C	ckb2	20581	406	0.0197269	0.124235	28388	422	0.0148654	-0.155566	49797	-0.0303983	0.73516	1.05156	14657	360	0.0245616	0.0235735	15911	351	0.0220602	0.0291904	31279	0.0332853	0.572766	1.03863
006_E12	SPAC1952.10C	SPAC1952.10C	20210	317	0.0156853	-0.206518	19982	270	0.0135122	-0.29327	40779	-0.241708	0.414342	1.06593	15164	314	0.0207069	-0.222719	8982	126	0.0140281	-0.623941	24586	-0.318823	0.5692	1.03575
006_E13	SPBC609.04	caf5	16931	276	0.0163015	-0.15093	22982	424	0.0184492	0.156032	40613	0.0223358	0.585924	1.06513	10129	271	0.0267549	0.146968	9703	231	0.0238071	0.139134	20334	0.155315	0.44999	1.05399
006_E14	SPAC23G3.10C	ssr3	16411	244	0.0148681	-0.283713	18086	252	0.0139334	-0.248978	34993	-0.264291	0.338574	1.04488	10346	279	0.0269669	0.158358	10694	195	0.0182345	-0.245584	21514	-0.0127897	0.774117	1.02049
006_E15	SPBP23A10.14C	ell1	13270	334	0.0251696	0.475749	26027	543	0.020863	0.333415	40174	0.369997	0.0198123	0.433945	9273	189	0.0203818	-0.245555	13151	299	0.0227359	0.0727169	22912	-0.0627046	0.869163	1.01113
006_E16	SPAC4A8.02C	SPAC4A8.02C	14283	303	0.021214	0.229088	13694	214	0.0156273	-0.0834612	28494	0.0977626	0.45081	1.06426	9323	202	0.0216668	-0.157344	3408	78	0.0228873	0.0822927	13011	-0.047461	0.977941	1.00442
006_E17	SPCC1442.11C	SPCC1442.11C	444	9	0.0202703	0.163434	420	8	0.0190476	0.202083	881	--	--	0.158655	282	11	0.0390071	0.690903	242	5	0.0206612	-0.0653351	540	--	--	0.158655
006_E18	SPACUNK4.09	SPACUNK4.09	10967	172	0.0156834	-0.206692	37250	590	0.0158389	-0.0640535	48979	-0.127911	0.852611	1.02835	9570	190	0.0198537	-0.283425	15066	259	0.017191	-0.3306	25085	-0.318595	0.573852	1.03881
006_E19	SPCC297.04C	set7	18538	314	0.0169382	-0.0956522	30794	508	0.0164967	-0.00534885	50154	-0.0515457	0.820224	1.03191	8320	140	0.0168269	-0.522062	7450	215	0.0288591	0.416768	16125	-0.0139057	0.871331	1.01141
006_E21	SPCC736.09C	SPCC736.09C	13578	279	0.0205479	0.183063	16315	356	0.0218204	0.39815	30528	0.298789	0.0758345	0.745115	10069	281	0.0279074	0.207816	9831	230	0.0233954	0.113968	20411	0.176013	0.413545	1.03485
006_E22	SPBC29A10.11C	vps902	22872	408	0.0178384	-0.0209446	15384	286	0.0185907	0.167056	38950	0.0710893	0.436926	1.06827	13503	325	0.0240687	-0.0056738	10581	308	0.0291088	0.429198	24717	0.209588	0.316397	1.01947
006_E23	SPAC22E12.06C	gmh3	15257	285	0.01868	0.0455594	35818	594	0.0165838	0.00225008	51954	-0.0049145	0.626162	1.05837	11069	308	0.0278255	0.203572	10398	237	0.0227928	0.0763249	22012	0.159594	0.421709	1.04039
006_E24	SPBC3H7.11	SPBC3H7.11	14079	287	0.020385	0.171575	39914	596	0.0149321	-0.149111	54876	-0.0785193	0.917753	1.01529	11990	391	0.0326105	0.432503	19426	414	0.0213116	-0.0206142	32221	0.172947	0.318754	1.01563
006_F01	SPBPB10D8.02C	SPBPB10D8.02C	12978	238	0.0183387	0.0189623	25464	477	0.0187323	0.178002	39157	0.107099	0.334886	1.04577	11863	342	0.0288291	0.254694	18556	438	0.0236042	0.126789	31199	0.173959	0.32296	1.01364
006_F02	SPAPYUG7.04C	rpb9	5881	195	0.0331576	0.87341	7211	250	0.0346693	1.06613	13537	0.976959	5.94534e-05	0.0053576	5046	131	0.0259612	0.103521	4551	115	0.0252692	0.225122	9843	0.173461	0.650199	1.01984
006_F03	SPCC1739.06C	SPCC1739.06C	3729	77	0.020649	0.190138	12818	264	0.020596	0.314839	16888	0.255042	0.249185	1.02602	3783	102	0.0269627	0.158133	9728	202	0.0207648	-0.0581159	13815	-0.0146052	0.927069	1.00255
006_F04	SPBC16A3.13	meu7	10059	159	0.0158067	-0.195391	19964	375	0.0187838	0.181962	30557	0.0426112	0.602291	1.06362	7115	159	0.0223472	-0.112742	6658	147	0.0220787	0.0303993	14079	-0.0328533	0.961451	1.00253
006_F05	SPCC622.08C	hta1	11398	216	0.0189507	0.0663194	50346	853	0.0169428	0.0331405	62813	0.00373064	0.559824	1.06047	9075	162	0.0178512	-0.436809	16111	325	0.0201726	-0.0998624	25673	-0.233242	0.763336	1.02124
006_F06	SPBC27B12.08	sip1	11569	202	0.0174605	-0.0518401	18415	362	0.0196579	0.24758	30548	0.123342	0.359443	1.0615	6077	120	0.0197466	-0.29123	3887	96	0.0246977	0.192121	10180	-0.0683077	0.846816	1.01864
006_F07	SPAC343.06C	SPAC343.06C	12277	200	0.0162906	-0.151889	67352	1088	0.0161539	-0.0356422	80917	-0.0943936	0.955125	1.01157	6785	140	0.0206338	-0.227827	19718	313	0.0158738	-0.445607	26956	-0.411187	0.413467	1.0363
006_F08	SPBC646.06C	agn2	6518	111	0.0170298	-0.0878728	10384	166	0.0159861	-0.0507071	17179	-0.0754684	0.776631	1.0388	5017	106	0.0211282	-0.193666	3560	82	0.0230337	0.0914906	8765	-0.0523545	0.830019	1.01987
006_F09	SPAC31G5.14	gcv1	12851	248	0.0192981	0.0925283	35044	482	0.0137541	-0.267662	48625	-0.180139	0.641883	1.05388	9477	208	0.0219479	-0.138752	17334	292	0.0168455	-0.359892	27311	-0.285439	0.661462	1.02576
006_F10	SPCC1235.08C	pdh1	10264	181	0.0176345	-0.0375346	22867	375	0.0163992	-0.0139046	33687	-0.0412572	0.881863	1.02483	7227	163	0.0225543	-0.0994304	7500	131	0.0174667	-0.307652	15021	-0.18719	0.716873	1.02253
006_F11	SPAC18B11.04	ncs1	9011	148	0.0164244	-0.140093	18401	367	0.0199446	0.268468	27927	0.121604	0.390841	1.05631	6098	151	0.0247622	0.0353069	13441	335	0.0249237	0.205265	20025	0.130058	0.499847	1.03794
006_F12	SPCC24B10.12	cgi121	13371	297	0.0222123	0.295424	16863	374	0.0221787	0.421649	30905	0.361981	0.0362325	0.574258	8503	243	0.0285781	0.242079	10847	231	0.0212962	-0.0216593	19824	0.108011	0.544596	1.03965
006_F13	SPAC644.13C	SPAC644.13C	10288	178	0.0173017	-0.0650165	10769	175	0.0162503	-0.0270574	21410	-0.0427921	0.963284	1.00703	7937	200	0.0251984	0.0605007	6718	178	0.026496	0.293517	15033	0.182451	0.490047	1.03814
006_F14	SPAC3H8.08C	SPAC3H8.08C	15944	275	0.0172479	-0.0695132	18804	316	0.0168049	0.0213569	35339	-0.0219322	0.791757	1.03747	6660	200	0.03003	0.313572	6639	205	0.0308781	0.51433	13704	0.422062	0.186553	0.983698
006_F15	SPAC1002.02	pom34	13818	222	0.016066	-0.17192	36037	614	0.017038	0.0412317	50691	-0.0423956	0.780193	1.04048	6118	87	0.0142203	-0.764878	10134	179	0.0176633	-0.2915	16518	-0.473733	0.250979	0.997578
006_F16	SPAC328.03	tps1	26564	495	0.0186342	0.0420249	36772	703	0.0191178	0.207389	64534	0.13137	0.193888	0.994348	10536	222	0.0210706	-0.197601	7434	187	0.0251547	0.218572	18379	0.00196834	0.791448	1.01693
006_F17	SPAC13C5.06C	mug121	17334	311	0.0179416	-0.0126212	30009	497	0.0165617	0.000322542	48151	-0.0169562	0.689309	1.05692	9530	190	0.019937	-0.277382	7775	153	0.0196785	-0.135639	17648	-0.197522	0.741961	1.02219
006_F18	SPBC21B10.12	rec6	12743	231	0.0181276	0.00225669	43579	635	0.0145712	-0.184405	57188	-0.167492	0.708056	1.04845	5935	94	0.0158382	-0.609421	8344	138	0.0165388	-0.386399	14511	-0.484312	0.222555	0.992356
006_F19	SPAC20H4.11C	rho5	31093	526	0.016917	-0.0974582	72385	1301	0.0179733	0.11833	105305	0.0319922	0.432311	1.06942	12229	263	0.0215063	-0.168077	19452	479	0.0246247	0.187851	32423	0.0432592	0.544446	1.04126
006_F20	SPAC16E8.17C	SPAC16E8.17C	17787	409	0.0229943	0.345346	25992	509	0.0195829	0.24207	44697	0.280095	0.0532097	0.665966	10412	302	0.029005	0.263468	6687	188	0.0281143	0.379046	17589	0.334328	0.228134	0.98921
006_F21	SPAC4F10.17	SPAC4F10.17	20289	344	0.016955	-0.0942204	46327	814	0.0175707	0.0856475	67774	0.00953426	0.528247	1.06392	18499	441	0.0238391	-0.0195022	25164	586	0.0232872	0.107283	44690	0.0494109	0.474846	1.04241
006_F22	SPAC26A3.04	rpl2002	11071	274	0.0247493	0.451459	19279	426	0.0220966	0.416295	31050	0.417498	0.0177559	0.405813	6360	262	0.041195	0.769635	8029	219	0.0272761	0.335383	14870	0.556528	0.0802929	0.741238
006_F23	SPAC664.12C	SPAC664.12C	17744	323	0.0182033	0.0082717	25101	430	0.0171308	0.0490638	43598	0.0253626	0.556413	1.06038	13131	400	0.0304623	0.33419	8806	217	0.0246423	0.18888	22554	0.307362	0.211356	0.988633
006_F24	SPAC5H10.02C	hsp3102	20541	391	0.0190351	0.072731	26857	459	0.0170905	0.0456679	48248	0.0544763	0.435486	1.06806	13499	342	0.0253352	0.0683102	15436	421	0.0272739	0.335265	29698	0.214325	0.275032	1.02827
006_G01	SPAC25B8.15C	SPAC25B8.15C	12778	266	0.020817	0.201833	11839	267	0.0225526	0.445764	25150	0.32632	0.0774882	0.749686	10536	306	0.0290433	0.265371	7467	246	0.032945	0.607802	18555	0.431889	0.129606	0.89083
006_G02	SPCC24B10.14C	xlf1	5476	128	0.0233747	0.369018	18703	340	0.0181789	0.134737	24647	0.164594	0.322428	1.05164	3824	102	0.0266736	0.142581	11467	223	0.0194471	-0.1527	15616	-0.0967851	0.929149	1.00239
006_G03	SPAC4G8.11C	atp10	7279	168	0.0230801	0.350718	14904	253	0.0169753	0.0359097	22604	0.136205	0.42073	1.06244	6362	187	0.0293933	0.282652	8554	189	0.0220949	0.031459	15292	0.14933	0.545718	1.04116
006_G04	SPAC140.04	ctr1	5440	206	0.0378676	1.06503	24137	733	0.0303683	0.875039	30516	0.878489	3.946e-06	0.000541117	2798	126	0.0450322	0.898122	7948	298	0.0374937	0.794392	11170	0.795722	0.0250891	0.519609
006_G05	SPAC869.06C	SPAC869.06C	7358	137	0.0186192	0.0408591	16956	266	0.0156877	-0.0778977	24717	-0.0591678	0.950694	1.013	7194	133	0.0184876	-0.386273	10302	170	0.0165017	-0.389646	17799	-0.392249	0.374082	1.01518
006_G06	SPBC428.05C	arg12	12220	195	0.0159574	-0.181701	20385	334	0.0163846	-0.0151879	33134	-0.0899859	0.920277	1.01523	10119	227	0.022433	-0.107208	9748	220	0.0225687	0.0620693	20314	-0.0146413	0.796279	1.01732
006_G07	SPBC16C6.03C	SPBC16C6.03C	31094	569	0.0182994	0.0158612	20748	304	0.014652	-0.176429	52715	-0.0363001	0.747307	1.04709	16036	401	0.0250062	0.0494544	6673	148	0.0221789	0.0369337	23258	0.0889999	0.536026	1.03841
006_G08	SPCC5E4.10C	SPCC5E4.10C	23167	365	0.0157552	-0.200106	16541	254	0.0153558	-0.108746	40327	-0.147651	0.738667	1.05086	9740	173	0.0177618	-0.444055	5686	106	0.0186423	-0.213678	15705	-0.329641	0.451922	1.04993
006_G09	SPBC19C2.04C	ubp11	26094	466	0.0178585	-0.0193194	41000	720	0.017561	0.0848449	68280	0.033688	0.442718	1.0659	14111	268	0.0189923	-0.347421	13873	352	0.025373	0.23104	28604	-0.0368761	0.747299	1.01928
006_G10	SPAC16E8.05C	mde1	16713	340	0.0203434	0.168633	35466	542	0.0152822	-0.115672	53061	-0.030851	0.723873	1.0526	10921	220	0.0201447	-0.262435	8529	152	0.0178216	-0.278633	19822	-0.24901	0.663074	1.02472
006_G11	SPBC31F10.03	SPBC31F10.03	48	0	0	--	85	1	0.0117647	-0.493063	134	--	--	0.158655	66	0	0	--	79	4	0.0506329	1.22782	149	--	--	0.158655
006_G12	SPAC19G12.09	SPAC19G12.09	68	6	0.0882353	2.28542	126	2	0.015873	-0.0609518	202	--	--	0.158655	71	1	0.0140845	-0.778724	69	2	0.0289855	0.423076	143	--	--	0.158655
006_G13	SPBC660.17C	SPBC660.17C	38035	633	0.0166426	-0.121053	18696	307	0.0164206	-0.012019	57671	-0.0596369	0.828768	1.03195	17231	301	0.0174685	-0.468076	7325	152	0.0207509	-0.0590854	25009	-0.301107	0.609125	1.03482
006_G14	SPAC24C9.12C	SPAC24C9.12C	19104	312	0.0163317	-0.14826	34988	530	0.0151481	-0.128396	54934	-0.149755	0.77713	1.03859	11713	198	0.0169043	-0.515444	10983	208	0.0189384	-0.190945	23102	-0.3455	0.504399	1.03646
006_G15	SPBP4H10.18C	SPBP4H10.18C	21154	356	0.016829	-0.104984	11546	211	0.0182747	0.142322	33267	0.00589774	0.705124	1.05052	15314	311	0.0203082	-0.25077	7207	159	0.0220619	0.0292999	22991	-0.123152	0.990047	1.00086
006_G16	SPAC4F8.15	itr1	26158	447	0.0170885	-0.0829086	41668	686	0.0164635	-0.00825934	68959	-0.0479228	0.755971	1.04439	14503	324	0.0223402	-0.113191	15474	245	0.015833	-0.449321	30546	-0.259969	0.741989	1.02178
006_G19	SPCC306.07C	SPCC306.07C	26559	482	0.0181483	0.00390112	31303	517	0.016516	-0.00366471	58861	-0.000291877	0.585129	1.06553	20010	508	0.0253873	0.0712738	7776	197	0.0253344	0.228839	28491	0.158723	0.363771	1.00983
006_G20	SPBC1709.04C	cyp3	24881	560	0.0225071	0.314451	30461	592	0.0194347	0.231106	56494	0.269534	0.0448311	0.614771	14054	304	0.0216309	-0.159743	10229	203	0.0198455	-0.123441	24790	-0.122503	0.986791	1.00142
006_G21	SPCC737.05	SPCC737.05	25813	464	0.0179754	-0.00990421	54029	857	0.0158619	-0.0619668	81163	-0.0617497	0.807118	1.03146	19952	389	0.0194968	-0.309597	5027	27	0.005371	-2.00899	25395	-0.448674	0.344231	0.999667
006_G22	SPBC2A9.07C	hpz1	25434	469	0.0184399	0.0268984	30972	489	0.0157885	-0.0686581	57364	-0.0239833	0.6818	1.06088	9774	226	0.0231226	-0.0635318	9695	190	0.0195977	-0.141569	19885	-0.0891374	0.974499	1.00482
006_G23	SPBC106.03	SPBC106.03	20192	410	0.0203051	0.165909	20594	418	0.0202972	0.293751	41614	0.233396	0.0994589	0.834291	18766	499	0.0265906	0.138085	11985	349	0.0291197	0.429741	31599	0.278889	0.190008	0.980564
006_G24	SPBC685.03	SPBC685.03	22971	452	0.019677	0.120578	42448	723	0.0170326	0.040771	66594	0.0567188	0.372794	1.05927	9354	279	0.0298268	0.303776	12224	310	0.0253599	0.230296	22167	0.264164	0.265087	1.00541
006_H02	SPBC1105.02C	lys4	8256	149	0.0180475	-0.00413374	10772	177	0.0164315	-0.0110648	19354	-0.0114123	0.959054	1.00862	5166	149	0.0288424	0.255359	5997	126	0.0210105	-0.0411452	11438	0.116165	0.711658	1.02625
006_H03	SPCC191.09C	gst1	3594	66	0.0183639	0.0209444	7617	136	0.0178548	0.108784	11413	0.06128	0.912404	1.01328	2507	56	0.0223375	-0.113369	3507	114	0.0325064	0.588468	6184	0.314596	0.551259	1.03728
006_H04	SPBC16D10.11C	rps1801	10597	127	0.0119845	-0.594759	19854	266	0.0133978	-0.305532	30844	-0.420121	0.0809536	0.759904	5275	80	0.0151659	-0.672005	6108	111	0.0181729	-0.250468	11574	-0.43785	0.244367	1.00035
006_H05	SPCC70.10	SPCC70.10	11866	211	0.0177819	-0.0255219	25983	431	0.0165878	0.00259179	38491	-0.0258423	0.781924	1.03971	10779	202	0.0187401	-0.366702	10046	171	0.0170217	-0.344881	21198	-0.343683	0.490382	1.03815
006_H06	SPBC2A9.05C	tvp23	17477	281	0.0160783	-0.170819	16389	261	0.0159253	-0.0562061	34408	-0.109705	0.852455	1.02856	6551	128	0.019539	-0.306477	5217	100	0.0191681	-0.173548	11996	-0.230377	0.566288	1.03764
006_H07	SPAC30C2.07	SPAC30C2.07	21839	351	0.0160722	-0.171367	18544	406	0.0218939	0.402999	41140	0.118385	0.29541	1.0364	11671	210	0.0179933	-0.425372	8825	185	0.0209632	-0.044399	20891	-0.238032	0.700308	1.02538
006_H08	SPBC6B1.03C	SPBC6B1.03C	3008	50	0.0166223	-0.122808	12712	184	0.0144745	-0.194013	15954	-0.214253	0.361767	1.05552	2115	39	0.0184397	-0.390017	4874	79	0.0162085	-0.41551	7107	-0.428913	0.193595	0.979801
006_H10	SPCC1281.04	SPCC1281.04	10876	188	0.0172858	-0.0663466	14926	234	0.0156773	-0.0788471	26224	-0.0784003	0.897061	1.01848	5642	109	0.0193194	-0.322784	5519	113	0.0204747	-0.0784121	11383	-0.192449	0.624897	1.02191
006_H11	SPBC2D10.07C	SPBC2D10.07C	41	1	0.0243902	0.430373	65	1	0.0153846	-0.10604	108	--	--	0.158655	30	1	0.0333333	0.464132	32	2	0.0625	1.5316	65	--	--	0.158655
006_H12	SPCC330.12C	sdh3	44	0	0	--	83	0	0	--	127	--	--	0.158655	42	2	0.047619	0.978705	49	1	0.0204082	-0.0831098	94	--	--	0.158655
006_H13	SPAPB24D3.04C	mag1	16772	306	0.0182447	0.0115457	28979	424	0.0146313	-0.178472	46481	-0.114067	0.901326	1.016	8155	207	0.0253832	0.0710404	7197	108	0.0150063	-0.526692	15667	-0.147617	0.81589	1.0172
006_H14	SPAC21E11.03C	pcr1	3209	64	0.0199439	0.140017	6039	117	0.0193741	0.226599	9429	0.180616	0.628927	1.05738	1105	28	0.0253394	0.0685469	1778	50	0.0281215	0.379417	2961	0.251361	0.907781	1.01086
006_H15	SPAC1002.12C	SPAC1002.12C	14955	197	0.0131729	-0.458363	40795	669	0.0163991	-0.0139142	56616	-0.152765	0.767752	1.0433	7714	123	0.015945	-0.599726	12822	235	0.0183279	-0.238217	20894	-0.382738	0.418599	1.04005
006_H16	SPBC16G5.02C	SPBC16G5.02C	11306	212	0.0187511	0.0510445	31369	538	0.0171507	0.0507386	43425	0.0253391	0.557517	1.05992	5902	124	0.0210098	-0.201769	5243	112	0.0213618	-0.0172218	11381	-0.102152	0.811509	1.02063
006_H17	SPAC144.04C	spe1	28147	487	0.017302	-0.0649906	39443	686	0.0173922	0.0709112	68763	0.00716093	0.535296	1.06117	16352	285	0.0174291	-0.471339	9079	213	0.0234607	0.117992	25929	-0.214985	0.807619	1.02186
006_H18	SPBC4B4.12C	SPBC4B4.12C	31496	516	0.016383	-0.143729	25904	391	0.0150942	-0.133534	58307	-0.128109	0.875537	1.02352	15057	256	0.0170021	-0.507124	7972	179	0.0224536	0.0546899	23464	-0.266978	0.666848	1.02702
006_H19	SPAC23C4.07	tht2	9952	153	0.0153738	-0.235458	42170	678	0.0160778	-0.0424598	52953	-0.115204	0.91856	1.01476	6834	149	0.0218028	-0.148323	9407	191	0.020304	-0.0904901	16581	-0.118648	0.899141	1.01452
006_H20	SPAC17G8.14C	pck1	17351	261	0.0150424	-0.2669	26162	451	0.0172387	0.0581265	44225	-0.0777296	0.956906	1.01108	7279	168	0.0230801	-0.0661845	7908	174	0.022003	0.0254464	15529	-0.0133827	0.883188	1.01174
006_H22	SPAC29B12.06C	rcd1	3437	73	0.0212395	0.230815	1444	34	0.0235457	0.507936	4988	0.344202	0.464104	1.05765	2453	97	0.0395434	0.710604	812	23	0.0283251	0.389826	3385	0.693337	0.214026	0.985021
006_H23	SPAC6G10.08	idp1	10931	200	0.0182966	0.0156434	38869	696	0.0179063	0.112939	50696	0.0591926	0.41042	1.06278	10238	353	0.0344794	0.512901	13442	314	0.0233596	0.111761	24347	0.309476	0.196464	0.977044
006_H24	SPAC607.07C	SPAC607.07C	28186	500	0.0177393	-0.0289819	24320	454	0.0186678	0.173021	53460	0.0733466	0.358537	1.06181	15252	378	0.0247836	0.0365543	9125	261	0.0286027	0.403897	25016	0.205753	0.319416	1.01159
006_I01	SPAC25G10.02	cce1	11895	278	0.0233712	0.368798	13098	221	0.0168728	0.0271718	25492	0.209355	0.221734	0.999068	9939	384	0.0386357	0.6771	9820	262	0.0266802	0.303516	20405	0.524482	0.0662733	0.704825
006_I02	SPAC18G6.13	SPAC18G6.13	3547	232	0.0654074	1.85352	5322	309	0.0580609	1.81004	9410	1.82062	8.64224e-12	3.89395e-09	3294	309	0.0938069	1.95686	2926	246	0.0840738	1.9594	6775	1.97296	5.51321e-07	0.00028926
006_I03	SPAC4H3.14C	rng8	10318	183	0.017736	-0.0292509	21388	422	0.0197307	0.252913	32311	0.144019	0.293978	1.03483	6940	148	0.0213256	-0.180244	9873	207	0.0209663	-0.0441858	17168	-0.1063	0.938618	1.00537
006_I04	SPAC1834.09	mug51	19596	319	0.0162788	-0.152934	21145	371	0.0175455	0.0835746	41431	-0.0280454	0.770332	1.04053	13807	322	0.0233215	-0.0511727	11286	241	0.0213539	-0.0177572	25656	-0.0186921	0.73551	1.02134
006_I05	SPAP32A8.02	SPAP32A8.02	23994	422	0.0175877	-0.0413619	11132	195	0.0175171	0.0812332	35743	0.0245708	0.615022	1.06173	15101	326	0.021588	-0.162606	4596	126	0.0274151	0.342717	20149	0.0138048	0.735438	1.02169
006_I06	SPBC56F2.05C	SPBC56F2.05C	9077	167	0.0183981	0.0236294	8159	114	0.0139723	-0.244958	17517	-0.0830152	0.757221	1.04474	9351	196	0.0209603	-0.205172	5321	72	0.0135313	-0.675957	14940	-0.315375	0.465637	1.04627
006_I07	SPBC16C6.09	ogm4	14195	657	0.0462839	1.35458	12311	495	0.0402079	1.27995	27658	1.33159	2.55133e-11	8.0469e-09	6803	208	0.0305747	0.339507	4489	164	0.0365337	0.756974	11664	0.535459	0.12231	0.883101
006_I08	SPCC825.04C	naa40	9928	199	0.0200443	0.147262	11426	188	0.0164537	-0.00911584	21741	0.0696669	0.633521	1.05275	7094	144	0.0202988	-0.251436	6173	132	0.0213834	-0.0157619	13543	-0.127716	0.81314	1.02064
006_I09	SPBC20F10.10	psl1	8165	170	0.0208206	0.202079	17741	330	0.018601	0.167851	26406	0.160481	0.31163	1.04451	5405	176	0.0325624	0.430375	10741	259	0.0241132	0.157568	16581	0.245297	0.358243	1.00512
006_I10	SPAC17A5.09C	glc9	20338	367	0.018045	-0.00432895	62304	1026	0.0164676	-0.00789403	84035	-0.0349122	0.689389	1.05601	14027	305	0.0217438	-0.152231	18793	360	0.0191561	-0.174455	33485	-0.165763	0.985178	1.0027
006_I11	SPBC336.10C	tif512	8009	156	0.0194781	0.105921	18256	306	0.0167616	0.0176329	26727	0.0265909	0.704334	1.05084	4985	106	0.0212638	-0.184435	8222	157	0.0190951	-0.179053	13470	-0.190782	0.677104	1.02625
006_I12	SPAC20G8.07C	erg2	9807	189	0.0192719	0.0905713	21479	369	0.0171796	0.0531659	31844	0.0465875	0.575272	1.0673	8412	192	0.0228245	-0.082248	9805	208	0.0212137	-0.0272621	18617	-0.0498275	0.904768	1.01252
006_I13	SPBC685.04C	aps2	16363	306	0.0187007	0.0471632	24078	410	0.017028	0.0403803	41157	0.0359806	0.53488	1.06168	13776	236	0.0171312	-0.496204	9295	159	0.017106	-0.337756	23466	-0.40877	0.395401	1.02362
006_I14	SPAC25B8.05	deg1	7931	128	0.0161392	-0.165362	23589	290	0.0122939	-0.429589	31938	-0.380925	0.121196	0.87472	6404	146	0.0227983	-0.0839104	8599	174	0.0202349	-0.0954096	15323	-0.0917212	0.934317	1.00486
006_I15	SPCC1020.05	SPCC1020.05	1645	41	0.024924	0.461605	2557	40	0.0156433	-0.0819802	4283	0.158685	0.961121	1.0071	1087	28	0.025759	0.0922413	1065	35	0.0328638	0.604245	2215	0.365132	0.775242	1.01983
006_I17	SPCC1494.08C	SPCC1494.08C	51929	967	0.0186216	0.0410442	40555	691	0.0170386	0.0412779	94142	0.0540079	0.357668	1.06023	19704	454	0.023041	-0.0686298	10261	234	0.0228048	0.0770811	30653	0.0145881	0.616587	1.02645
006_I19	SPCC330.03C	SPCC330.03C	19233	256	0.0133105	-0.443371	15599	245	0.0157061	-0.0761999	35333	-0.263763	0.340767	1.04959	9909	195	0.0196791	-0.296171	8134	160	0.0196705	-0.136221	18398	-0.208162	0.730662	1.02182
006_I20	SPBC18E5.08	SPBC18E5.08	45865	808	0.0176169	-0.0389695	45113	634	0.0140536	-0.236588	92420	-0.123679	0.903341	1.0161	20168	392	0.0194367	-0.314048	15373	233	0.0151564	-0.512325	36166	-0.37017	0.533462	1.04048
006_I21	SPCC777.08C	bit61	41721	639	0.015316	-0.240889	35616	558	0.0156671	-0.0797884	78534	-0.157968	0.758013	1.04492	20121	463	0.0230108	-0.0705234	22891	373	0.0162946	-0.407861	43848	-0.225778	0.887739	1.0129
006_I22	SPBC2G5.06C	hmt2	14060	219	0.0155761	-0.216597	11278	200	0.0177336	0.0989607	25757	-0.0625128	0.951394	1.01238	12790	224	0.0175137	-0.464351	8041	201	0.0249969	0.209493	21256	-0.155811	0.890597	1.01396
006_I23	SPBC28E12.04	SPBC28E12.04	7476	174	0.0232745	0.362818	8937	188	0.0210361	0.345342	16775	0.35299	0.115319	0.870138	4666	154	0.0330047	0.449839	3551	108	0.030414	0.492478	8479	0.488341	0.219497	0.988523
006_I24	SPBC839.17C	fkh1	36238	725	0.0200066	0.144546	50380	821	0.0162961	-0.022997	88164	0.0476412	0.378608	1.05675	21834	720	0.0329761	0.448587	22412	438	0.0195431	-0.145597	45404	0.203474	0.231753	0.989903
006_J01	SPCC1020.06C	tal1	12112	263	0.021714	0.262694	17286	325	0.0188013	0.183308	29986	0.211938	0.180681	0.979156	11391	297	0.0260732	0.109735	12019	348	0.0289542	0.421514	24055	0.277632	0.23335	0.987347
006_J02	SPBC119.03	SPBC119.03	7102	135	0.0190087	0.0707309	10766	197	0.0182983	0.144185	18200	0.105645	0.587844	1.06372	6181	127	0.0205468	-0.233917	7638	170	0.0222571	0.0420118	14116	-0.0807324	0.931415	1.00311
006_J03	SPCC2H8.05C	dbl1	10754	183	0.0170169	-0.0889609	17506	276	0.015766	-0.0707093	28719	-0.0884277	0.886046	1.02403	8911	175	0.0196386	-0.299138	11570	239	0.0206569	-0.0656343	20895	-0.169197	0.854684	1.01568
006_J04	SPBC1709.16C	SPBC1709.16C	10337	164	0.0158653	-0.190053	23107	316	0.0136755	-0.275933	33924	-0.266873	0.329365	1.04825	8168	121	0.0148139	-0.705881	10405	169	0.0162422	-0.41251	18863	-0.541696	0.192304	0.981156
006_J05	SPCC737.06C	SPCC737.06C	9665	165	0.0170719	-0.0843068	24758	388	0.0156717	-0.0793662	34976	-0.104254	0.878064	1.02457	5972	135	0.0226055	-0.0961602	9038	153	0.0169285	-0.3528	15298	-0.244397	0.604084	1.03463
006_J06	SPBC317.01	mbx2	5412	91	0.0168145	-0.106226	17185	300	0.0174571	0.0762846	22988	0.00287699	0.844337	1.0286	3738	60	0.0160514	-0.590138	6486	121	0.0186556	-0.21265	10405	-0.360512	0.323494	1.0143
006_J07	SPAC56F8.16	esc1	8482	164	0.0193351	0.0952882	21123	313	0.014818	-0.16018	30082	-0.100012	0.854774	1.02742	6208	118	0.0190077	-0.346247	10262	227	0.0221204	0.0331243	16815	-0.117786	0.905631	1.01097
006_J08	SPBC725.15	ura5	12206	212	0.0173685	-0.0594574	11284	209	0.0185218	0.161696	23911	0.0536132	0.65128	1.05394	6812	142	0.0208456	-0.213093	5494	120	0.021842	0.0148495	12568	-0.0943372	0.861702	1.01067
006_J09	SPBC19C2.06C	mug124	16078	291	0.0180993	0	27623	427	0.0154581	-0.099162	44419	-0.0718428	0.931376	1.0147	13974	266	0.0190354	-0.344152	16313	233	0.0142831	-0.597948	30786	-0.464201	0.345235	0.997064
006_J11	SPAC1250.03	ubc14	3845	72	0.0187256	0.0490821	4288	95	0.0221549	0.420095	8300	0.249828	0.499056	1.05075	1362	42	0.030837	0.351829	1404	33	0.0235043	0.120667	2841	0.254547	0.91332	1.0113
006_J12	SPCC569.02C	SPCC569.02C	17377	291	0.0167463	-0.112091	35714	562	0.0157361	-0.0734477	53944	-0.104082	0.969178	1.00585	8169	176	0.0215449	-0.16549	8079	152	0.0188142	-0.200433	16576	-0.171108	0.781348	1.0185
006_J13	SPBC36.11	SPBC36.11	13159	266	0.0202143	0.159445	23820	396	0.0166247	0.00579895	37641	0.0519646	0.506438	1.05502	7191	145	0.0201641	-0.261045	10104	205	0.020289	-0.0915587	17645	-0.167542	0.808214	1.02138
006_J14	SPBC29A3.10C	atp14	8075	143	0.017709	-0.0314502	27435	603	0.0219792	0.408612	36256	0.28279	0.0696517	0.729839	4995	154	0.0308308	0.35154	9573	226	0.0236081	0.127024	14948	0.198654	0.463222	1.04607
006_J15	SPAC1002.17C	urg2	18088	340	0.018797	0.0545707	28797	485	0.016842	0.0245382	47710	0.0271073	0.528353	1.06345	8642	183	0.0211757	-0.190427	9838	192	0.0195162	-0.147587	18855	-0.163616	0.837066	1.01859
006_J16	SPAC16E8.12C	png3	16482	269	0.0163208	-0.149216	17613	28	0.00158973	-3.38067	34392	--	--	0.158655	11281	180	0.015956	-0.598732	10213	189	0.0185058	-0.224277	21863	-0.404855	0.39	1.01801
006_J17	SPAC14C4.06C	nab2	21663	437	0.0201726	0.156469	39108	767	0.0196124	0.244235	61975	0.19822	0.0977548	0.822183	9491	358	0.0377199	0.642494	8900	242	0.027191	0.330874	18991	0.52142	0.0737322	0.729903
[truncated: 1,296 more rows]
