# Supplementary material for: Interconnections Between RNA-Processing Pathways Revealed by a Sequencing-Based Genetic Screen for Pre-mRNA Splicing Mutants in Fission Yeast
Source: G3 (Bethesda). 2016 Mar 25;6(6):1513–23. doi: 10.1534/g3.116.027508 (PMC4889648; doi:10.1534/g3.116.027508)
Supplement: Supplemental Material [file supp_g3.116.027508_TableS2.xlsx]

## Sheet: TableS2
TableS2: Primer sequences used. The listed sense and antisense primers were used for the first PCR reaction in which the splicing event is amplified with a plate specific barcode. The second PCR reaction used primer sequences of the "Nextera XT index kit v2" available through Illumina.
Description	Primer sequence
fet5, Illumina forward, flanking intron, antisense, barcode 1	tcgtcggcagcgtcagatgtgtataagagacagACAAGCTAGGAAGGAAATTGACCATATTAAAGTC
fet5, Illumina forward, flanking intron, antisense, barcode 2	tcgtcggcagcgtcagatgtgtataagagacagNAAACATCGGGAAGGAAATTGACCATATTAAAGTC
fet5, Illumina forward, flanking intron, antisense, barcode 3	tcgtcggcagcgtcagatgtgtataagagacagNNACATTGGCGGAAGGAAATTGACCATATTAAAGTC
fet5, Illumina forward, flanking intron, antisense, barcode 4	tcgtcggcagcgtcagatgtgtataagagacagNNNACCACTGTGGAAGGAAATTGACCATATTAAAGTC
fet5, Illumina forward, flanking intron, antisense, barcode 5	tcgtcggcagcgtcagatgtgtataagagacagAACGTGATGGAAGGAAATTGACCATATTAAAGTC
fet5, Illumina forward, flanking intron, antisense, barcode 6	tcgtcggcagcgtcagatgtgtataagagacagNCGCTGATCGGAAGGAAATTGACCATATTAAAGTC
fet5, Illumina forward, flanking intron, antisense, barcode 7	tcgtcggcagcgtcagatgtgtataagagacagNNCAGATCTGGGAAGGAAATTGACCATATTAAAGTC
fet5, Illumina forward, flanking intron, antisense, barcode 8	tcgtcggcagcgtcagatgtgtataagagacagNNNATGCCTAAGGAAGGAAATTGACCATATTAAAGTC
fet5, Illumina forward, flanking intron, antisense, barcode 9	tcgtcggcagcgtcagatgtgtataagagacagCTGTAGCCGGAAGGAAATTGACCATATTAAAGTC
fet5, Illumina forward, flanking intron, antisense, barcode 10	tcgtcggcagcgtcagatgtgtataagagacagNAGTACAAGGGAAGGAAATTGACCATATTAAAGTC
fet5, Illumina forward, flanking intron, antisense, barcode 11	tcgtcggcagcgtcagatgtgtataagagacagNNCATCAAGTGGAAGGAAATTGACCATATTAAAGTC
fet5, Illumina forward, flanking intron, antisense, barcode 12	tcgtcggcagcgtcagatgtgtataagagacagNNNAGTGGTCAGGAAGGAAATTGACCATATTAAAGTC
fet5, Illumina forward, flanking intron, antisense, barcode 13	tcgtcggcagcgtcagatgtgtataagagacagAACAACCAGGAAGGAAATTGACCATATTAAAGTC
fet5, Illumina forward, flanking intron, antisense, barcode 14	tcgtcggcagcgtcagatgtgtataagagacagNAACCGAGAGGAAGGAAATTGACCATATTAAAGTC
fet5, Illumina forward, flanking intron, antisense, barcode 15	tcgtcggcagcgtcagatgtgtataagagacagNNAACGCTTAGGAAGGAAATTGACCATATTAAAGTC
fet5, Illumina forward, flanking intron, antisense, barcode 16	tcgtcggcagcgtcagatgtgtataagagacagNNNAAGACGGAGGAAGGAAATTGACCATATTAAAGTC
fet5, Illumina forward, flanking intron, antisense, barcode 17	tcgtcggcagcgtcagatgtgtataagagacagAAGGTACAGGAAGGAAATTGACCATATTAAAGTC
fet5, Illumina forward, flanking intron, antisense, barcode 18	tcgtcggcagcgtcagatgtgtataagagacagNACACAGAAGGAAGGAAATTGACCATATTAAAGTC
fet5, Illumina forward, flanking intron, antisense, barcode 19	tcgtcggcagcgtcagatgtgtataagagacagNNACAGCAGAGGAAGGAAATTGACCATATTAAAGTC
fet5, Illumina forward, flanking intron, antisense, barcode 20	tcgtcggcagcgtcagatgtgtataagagacagNNNACCTCCAAGGAAGGAAATTGACCATATTAAAGTC
fet5, Illumina forward, flanking intron, antisense, barcode 21	tcgtcggcagcgtcagatgtgtataagagacagACGCTCGAGGAAGGAAATTGACCATATTAAAGTC
fet5, Illumina forward, flanking intron, antisense, barcode 22	tcgtcggcagcgtcagatgtgtataagagacagNACGTATCAGGAAGGAAATTGACCATATTAAAGTC
fet5, Illumina forward, flanking intron, antisense, barcode 23	tcgtcggcagcgtcagatgtgtataagagacagNNACTATGCAGGAAGGAAATTGACCATATTAAAGTC
fet5, Illumina forward, flanking intron, antisense, barcode 24	tcgtcggcagcgtcagatgtgtataagagacagNNNAGAGTCAAGGAAGGAAATTGACCATATTAAAGTC
fet5, Illumina reverse, flanking intron, sense	gtctcgtgggctcggagatgtgtataagagacagACCCAAAGTTTCACGAACTTAATC
srrm1, Illumina forward, exon3, antisense, barcode 1	tcgtcggcagcgtcagatgtgtataagagacagACAAGCTACCAAGGTTTAAGGACTTCAATATTCA
srrm1, Illumina forward, exon3, antisense, barcode 2	tcgtcggcagcgtcagatgtgtataagagacagNAAACATCGCCAAGGTTTAAGGACTTCAATATTCA
srrm1, Illumina forward, exon3, antisense, barcode 3	tcgtcggcagcgtcagatgtgtataagagacagNNACATTGGCCCAAGGTTTAAGGACTTCAATATTCA
srrm1, Illumina forward, exon3, antisense, barcode 4	tcgtcggcagcgtcagatgtgtataagagacagNNNACCACTGTCCAAGGTTTAAGGACTTCAATATTCA
srrm1, Illumina forward, exon3, antisense, barcode 5	tcgtcggcagcgtcagatgtgtataagagacagAACGTGATCCAAGGTTTAAGGACTTCAATATTCA
srrm1, Illumina forward, exon3, antisense, barcode 6	tcgtcggcagcgtcagatgtgtataagagacagNCGCTGATCCCAAGGTTTAAGGACTTCAATATTCA
srrm1, Illumina forward, exon3, antisense, barcode 7	tcgtcggcagcgtcagatgtgtataagagacagNNCAGATCTGCCAAGGTTTAAGGACTTCAATATTCA
srrm1, Illumina forward, exon3, antisense, barcode 8	tcgtcggcagcgtcagatgtgtataagagacagNNNATGCCTAACCAAGGTTTAAGGACTTCAATATTCA
srrm1, Illumina forward, exon3, antisense, barcode 9	tcgtcggcagcgtcagatgtgtataagagacagCTGTAGCCCCAAGGTTTAAGGACTTCAATATTCA
srrm1, Illumina forward, exon3, antisense, barcode 10	tcgtcggcagcgtcagatgtgtataagagacagNAGTACAAGCCAAGGTTTAAGGACTTCAATATTCA
srrm1, Illumina forward, exon3, antisense, barcode 11	tcgtcggcagcgtcagatgtgtataagagacagNNCATCAAGTCCAAGGTTTAAGGACTTCAATATTCA
srrm1, Illumina forward, exon3, antisense, barcode 12	tcgtcggcagcgtcagatgtgtataagagacagNNNAGTGGTCACCAAGGTTTAAGGACTTCAATATTCA
srrm1, Illumina forward, exon3, antisense, barcode 13	tcgtcggcagcgtcagatgtgtataagagacagAACAACCACCAAGGTTTAAGGACTTCAATATTCA
srrm1, Illumina forward, exon3, antisense, barcode 14	tcgtcggcagcgtcagatgtgtataagagacagNAACCGAGACCAAGGTTTAAGGACTTCAATATTCA
srrm1, Illumina forward, exon3, antisense, barcode 15	tcgtcggcagcgtcagatgtgtataagagacagNNAACGCTTACCAAGGTTTAAGGACTTCAATATTCA
srrm1, Illumina forward, exon3, antisense, barcode 16	tcgtcggcagcgtcagatgtgtataagagacagNNNAAGACGGACCAAGGTTTAAGGACTTCAATATTCA
srrm1, Illumina forward, exon3, antisense, barcode 17	tcgtcggcagcgtcagatgtgtataagagacagAAGGTACACCAAGGTTTAAGGACTTCAATATTCA
srrm1, Illumina forward, exon3, antisense, barcode 18	tcgtcggcagcgtcagatgtgtataagagacagNACACAGAACCAAGGTTTAAGGACTTCAATATTCA
srrm1, Illumina forward, exon3, antisense, barcode 19	tcgtcggcagcgtcagatgtgtataagagacagNNACAGCAGACCAAGGTTTAAGGACTTCAATATTCA
srrm1, Illumina forward, exon3, antisense, barcode 20	tcgtcggcagcgtcagatgtgtataagagacagNNNACCTCCAACCAAGGTTTAAGGACTTCAATATTCA
srrm1, Illumina forward, exon3, antisense, barcode 21	tcgtcggcagcgtcagatgtgtataagagacagACGCTCGACCAAGGTTTAAGGACTTCAATATTCA
srrm1, Illumina forward, exon3, antisense, barcode 22	tcgtcggcagcgtcagatgtgtataagagacagNACGTATCACCAAGGTTTAAGGACTTCAATATTCA
srrm1, Illumina forward, exon3, antisense, barcode 23	tcgtcggcagcgtcagatgtgtataagagacagNNACTATGCACCAAGGTTTAAGGACTTCAATATTCA
srrm1, Illumina forward, exon3, antisense, barcode 24	tcgtcggcagcgtcagatgtgtataagagacagNNNAGAGTCAACCAAGGTTTAAGGACTTCAATATTCA
srrm1, Illumina reverse, exon1, sense	gtctcgtgggctcggagatgtgtataagagacagTTATTGCTGCCTTCTTTCATTCTT
