# Supplementary material for: Interconnections Between RNA-Processing Pathways Revealed by a Sequencing-Based Genetic Screen for Pre-mRNA Splicing Mutants in Fission Yeast
Source: G3 (Bethesda). 2016 Mar 25;6(6):1513–23. doi: 10.1534/g3.116.027508 (PMC4889648; doi:10.1534/g3.116.027508)
Supplement: Supplemental Material [file supp_g3.116.027508_TableS3.xlsx]

## Sheet: GO biological function
TableS3: Results of GO analysis of identified strains
GO biological process complete	All gene deletions assessed (2989)	Signficant genes deletions (61)	Expected	Fold Enrichment	P-value	Corrected P-value (Bonferronni)
nucleic acid metabolic process (GO:0090304)	390	22	7.96	2.76382	4.4e-06	0.00379
RNA metabolic process (GO:0016070)	270	18	5.51	3.26679	4.6e-06	0.00396227
mRNA cis splicing, via spliceosome (GO:0045292)	35	7	0.71	9.85915	7.57e-06	0.00652052
mRNA metabolic process (GO:0016071)	87	10	1.78	5.61798	1.01e-05	0.00869977
mRNA splicing, via spliceosome (GO:0000398)	38	7	0.78	8.97436	1.28e-05	0.0110255
RNA splicing, via transesterification reactions with bulged adenosine as nucleophile (GO:0000377)	38	7	0.78	8.97436	1.28e-05	0.0110255
RNA splicing, via transesterification reactions (GO:0000375)	38	7	0.78	8.97436	1.28e-05	0.0110255
RNA splicing (GO:0008380)	38	7	0.78	8.97436	1.28e-05	0.0110255
regulation of nucleobase-containing compound metabolic process (GO:0019219)	273	17	5.57	3.05206	2.24e-05	0.0192945
regulation of nitrogen compound metabolic process (GO:0051171)	306	18	6.24	2.88462	2.58e-05	0.0222232
regulation of cellular macromolecule biosynthetic process (GO:2000112)	287	17	5.86	2.90102	4.24e-05	0.0365218
regulation of macromolecule biosynthetic process (GO:0010556)	287	17	5.86	2.90102	4.24e-05	0.0365218
regulation of macromolecule metabolic process (GO:0060255)	382	20	7.8	2.5641	4.29e-05	0.0369525
mRNA processing (GO:0006397)	47	7	0.96	7.29167	4.93e-05	0.0424652
regulation of primary metabolic process (GO:0080090)	392	20	8	2.5	6.22e-05	0.0535768
cellular macromolecule metabolic process (GO:0044260)	983	35	20.06	1.74477	7.26e-05	0.062535
regulation of cellular metabolic process (GO:0031323)	397	20	8.1	2.46914	7.45e-05	0.0641716
regulation of cellular biosynthetic process (GO:0031326)	304	17	6.2	2.74194	8.74e-05	0.0752832
regulation of biosynthetic process (GO:0009889)	305	17	6.22	2.73312	9.11e-05	0.0784702
histone exchange (GO:0043486)	12	4	0.24	16.6667	0.000113	0.0973341
ATP-dependent chromatin remodeling (GO:0043044)	12	4	0.24	16.6667	0.000113	0.0973341
regulation of metabolic process (GO:0019222)	452	21	9.22	2.27766	0.000149	0.128343
negative regulation of cellular macromolecule biosynthetic process (GO:2000113)	124	10	2.53	3.95257	0.000195	0.167966
negative regulation of macromolecule biosynthetic process (GO:0010558)	124	10	2.53	3.95257	0.000195	0.167966
macromolecule metabolic process (GO:0043170)	1029	35	21	1.66667	0.000204	0.175718
nucleobase-containing compound metabolic process (GO:0006139)	502	22	10.24	2.14844	0.000229	0.197252
negative regulation of nitrogen compound metabolic process (GO:0051172)	136	10	2.78	3.59712	0.000407	0.350575
negative regulation of cellular biosynthetic process (GO:0031327)	136	10	2.78	3.59712	0.000407	0.350575
negative regulation of biosynthetic process (GO:0009890)	136	10	2.78	3.59712	0.000407	0.350575
regulation of RNA metabolic process (GO:0051252)	253	14	5.16	2.71318	0.000475	0.409148
regulation of gene expression (GO:0010468)	292	15	5.96	2.51678	0.000629	0.541798
negative regulation of gene expression (GO:0010629)	120	9	2.45	3.67347	0.000708	0.609845
cellular aromatic compound metabolic process (GO:0006725)	550	22	11.22	1.96078	0.000846	0.728714
heterocycle metabolic process (GO:0046483)	552	22	11.27	1.95209	0.000889	0.765752
regulation of cellular process (GO:0050794)	675	25	13.78	1.81422	0.001	0.861364
regulation of RNA biosynthetic process (GO:2001141)	245	13	5	2.6	0.00116	0.999182
regulation of transcription, DNA-templated (GO:0006355)	245	13	5	2.6	0.00116	0.999182
regulation of nucleic acid-templated transcription (GO:1903506)	245	13	5	2.6	0.00116	0.999182
negative regulation of nucleobase-containing compound metabolic process (GO:0045934)	130	9	2.65	3.39623	0.00124	1.06809
negative regulation of macromolecule metabolic process (GO:0010605)	158	10	3.22	3.10559	0.00128	1.10255
cellular nitrogen compound metabolic process (GO:0034641)	727	26	14.84	1.75202	0.00128	1.10255
negative regulation of cellular process (GO:0048523)	252	13	5.14	2.52918	0.0015	1.29205
regulation of DNA replication (GO:0006275)	11	3	0.22	13.6364	0.00153	1.31789
regulation of chromosome organization (GO:0033044)	61	6	1.24	4.83871	0.00154	1.3265
negative regulation of chromosome condensation (GO:1902340)	3	2	0.06	33.3333	0.00177	1.52461
organic cyclic compound metabolic process (GO:1901360)	581	22	11.86	1.85497	0.00178	1.53323
negative regulation of cellular metabolic process (GO:0031324)	168	10	3.43	2.91545	0.00203	1.74857
gene expression (GO:0010467)	398	17	8.12	2.0936	0.00203	1.74857
regulation of biological process (GO:0050789)	709	25	14.47	1.72771	0.00209	1.80025
negative regulation of transcription, DNA-templated (GO:0045892)	114	8	2.33	3.43348	0.00217	1.86916
negative regulation of RNA biosynthetic process (GO:1902679)	114	8	2.33	3.43348	0.00217	1.86916
negative regulation of nucleic acid-templated transcription (GO:1903507)	114	8	2.33	3.43348	0.00217	1.86916
chromosome organization (GO:0051276)	201	11	4.1	2.68293	0.0023	1.98114
negative regulation of biological process (GO:0048519)	265	13	5.41	2.40296	0.00235	2.0242
chromatin remodeling (GO:0006338)	90	7	1.84	3.80435	0.00236	2.03282
negative regulation of metabolic process (GO:0009892)	172	10	3.51	2.849	0.0024	2.06727
negative regulation of RNA metabolic process (GO:0051253)	116	8	2.37	3.37553	0.00242	2.0845
chromatin modification (GO:0016568)	116	8	2.37	3.37553	0.00242	2.0845
regulation of chromosome condensation (GO:0060623)	4	2	0.08	25	0.00311	2.67884
biological regulation (GO:0065007)	772	26	15.76	1.64975	0.00319	2.74775
cellular macromolecule biosynthetic process (GO:0034645)	320	14	6.53	2.14395	0.00446	3.84168
macromolecule biosynthetic process (GO:0009059)	322	14	6.57	2.1309	0.00472	4.06564
regulation of telomere maintenance via telomere lengthening (GO:1904356)	5	2	0.1	20	0.0048	4.13455
regulation of telomere maintenance via telomerase (GO:0032210)	5	2	0.1	20	0.0048	4.13455
chromatin organization (GO:0006325)	133	8	2.71	2.95203	0.00551	4.74611
regulation of telomere maintenance (GO:0032204)	6	2	0.12	16.6667	0.00682	5.8745
nitrogen compound metabolic process (GO:0006807)	814	26	16.61	1.56532	0.00684	5.89173
small molecule metabolic process (GO:0044281)	326	1	6.65	0.150376	0.00738	6.35686
nucleosome organization (GO:0034728)	40	4	0.82	4.87805	0.00914	7.87286
transcription, DNA-templated (GO:0006351)	64	5	1.31	3.81679	0.00992	8.54473
nucleic acid-templated transcription (GO:0097659)	65	5	1.33	3.7594	0.0106	9.13045
DNA-dependent DNA replication (GO:0006261)	42	4	0.86	4.65116	0.0108	9.30273
DNA replication (GO:0006260)	43	4	0.88	4.54545	0.0117	10.078
DNA-dependent DNA replication maintenance of fidelity (GO:0045005)	23	3	0.47	6.38298	0.0118	10.1641
RNA processing (GO:0006396)	152	8	3.1	2.58065	0.0119	10.2502
negative regulation of gene expression, epigenetic (GO:0045814)	68	5	1.39	3.59712	0.0126	10.8532
RNA biosynthetic process (GO:0032774)	68	5	1.39	3.59712	0.0126	10.8532
chromatin silencing (GO:0006342)	68	5	1.39	3.59712	0.0126	10.8532
regulation of organelle organization (GO:0033043)	95	6	1.94	3.09278	0.0129	11.1116
cellular response to DNA damage stimulus (GO:0006974)	124	7	2.53	2.7668	0.013	11.1977
gene silencing (GO:0016458)	70	5	1.43	3.4965	0.0142	12.2314
cellular metabolic process (GO:0044237)	1419	38	28.96	1.31215	0.0142	12.2314
cell fate commitment (GO:0045165)	9	2	0.18	11.1111	0.0147	12.662
mating type switching (GO:0007533)	9	2	0.18	11.1111	0.0147	12.662
mating type determination (GO:0007531)	9	2	0.18	11.1111	0.0147	12.662
sex determination (GO:0007530)	9	2	0.18	11.1111	0.0147	12.662
mitotic recombination (GO:0006312)	9	2	0.18	11.1111	0.0147	12.662
regulation of gene expression, epigenetic (GO:0040029)	71	5	1.45	3.44828	0.015	12.9205
RNA catabolic process (GO:0006401)	47	4	0.96	4.16667	0.0157	13.5234
macromolecular complex subunit organization (GO:0043933)	262	11	5.35	2.05607	0.0161	13.868
regulation of DNA metabolic process (GO:0051052)	26	3	0.53	5.66038	0.0163	14.0402
protein-DNA complex subunit organization (GO:0071824)	48	4	0.98	4.08163	0.0168	14.4709
cellular process (GO:0009987)	2181	52	44.51	1.16828	0.0176	15.16
regulation of homeostatic process (GO:0032844)	10	2	0.2	10	0.018	15.5045
cell cycle DNA replication termination (GO:1902294)	1	1	0.02	50	0.0202	17.3995
regulation of snoRNA metabolic process (GO:1903323)	1	1	0.02	50	0.0202	17.3995
regulation of heterochromatin island assembly (GO:1902801)	1	1	0.02	50	0.0202	17.3995
glycogen catabolic process (GO:0005980)	1	1	0.02	50	0.0202	17.3995
glycogen metabolic process (GO:0005977)	1	1	0.02	50	0.0202	17.3995
regulation of snoRNA processing (GO:1902796)	1	1	0.02	50	0.0202	17.3995
ribonucleotide excision repair (GO:1990516)	1	1	0.02	50	0.0202	17.3995
attachment of telomere to nuclear envelope (GO:0070197)	1	1	0.02	50	0.0202	17.3995
nuclear-transcribed mRNA catabolic process, meiosis-specific transcripts (GO:0033621)	1	1	0.02	50	0.0202	17.3995
G1 cell cycle arrest in response to nitrogen starvation (GO:0071849)	1	1	0.02	50	0.0202	17.3995
regulation of peptidyl-threonine phosphorylation (GO:0010799)	1	1	0.02	50	0.0202	17.3995
regulation of ribosomal protein gene transcription from RNA polymerase II promoter (GO:0060962)	1	1	0.02	50	0.0202	17.3995
mismatch repair involved in maintenance of fidelity involved in DNA-dependent DNA replication (GO:0070716)	1	1	0.02	50	0.0202	17.3995
negative regulation of ribosomal protein gene transcription from RNA polymerase II promoter (GO:0010688)	1	1	0.02	50	0.0202	17.3995
chromosome attachment to the nuclear envelope (GO:0097240)	1	1	0.02	50	0.0202	17.3995
energy reserve metabolic process (GO:0006112)	1	1	0.02	50	0.0202	17.3995
regulation of histone H3-T3 phosphorylation (GO:2000281)	1	1	0.02	50	0.0202	17.3995
RNA Polymerase III assembly (GO:1990115)	1	1	0.02	50	0.0202	17.3995
RNA Polymerase II core complex assembly (GO:1990114)	1	1	0.02	50	0.0202	17.3995
RNA Polymerase I assembly (GO:1990113)	1	1	0.02	50	0.0202	17.3995
histone H3-K56 acetylation (GO:0097043)	1	1	0.02	50	0.0202	17.3995
regulation of histone H3-T3 phosphorylation involved in chromosome passenger complex localization to kinetochore (GO:2000817)	1	1	0.02	50	0.0202	17.3995
nuclear DNA replication termination (GO:1902317)	1	1	0.02	50	0.0202	17.3995
mitotic DNA replication termination (GO:1902979)	1	1	0.02	50	0.0202	17.3995
DNA-templated transcription, termination (GO:0006353)	11	2	0.22	9.09091	0.0215	18.5193
cellular response to stress (GO:0033554)	277	11	5.65	1.9469	0.0234	20.1559
nuclear-transcribed mRNA catabolic process (GO:0000956)	31	3	0.63	4.7619	0.0257	22.137
transcription from RNA polymerase II promoter (GO:0006366)	55	4	1.12	3.57143	0.0261	22.4816
response to stress (GO:0006950)	284	11	5.8	1.89655	0.0275	23.6875
cell cycle (GO:0007049)	403	14	8.22	1.70316	0.0302	26.0132
response to stimulus (GO:0050896)	487	16	9.94	1.60966	0.0324	27.9082
primary metabolic process (GO:0044238)	1339	35	27.33	1.28064	0.0327	28.1666
mitotic DNA replication (GO:1902969)	14	2	0.29	6.89655	0.0335	28.8557
metabolic process (GO:0008152)	1488	38	30.37	1.25123	0.0335	28.8557
nucleic acid phosphodiester bond hydrolysis (GO:0090305)	36	3	0.73	4.10959	0.0375	32.3011
chromatin silencing at centromere (GO:0030702)	36	3	0.73	4.10959	0.0375	32.3011
cytoplasmic translational initiation (GO:0002183)	15	2	0.31	6.45161	0.0379	32.6457
cellular response to hyperoxia (GO:0071455)	2	1	0.04	25	0.04	34.4545
negative regulation of cytoplasmic translational initiation in response to stress (GO:1990625)	2	1	0.04	25	0.04	34.4545
regulation of translational initiation by eIF2 alpha phosphorylation (GO:0010998)	2	1	0.04	25	0.04	34.4545
regulation of cytoplasmic translational initiation in response to stress (GO:1990611)	2	1	0.04	25	0.04	34.4545
negative regulation of translational initiation in response to stress (GO:0032057)	2	1	0.04	25	0.04	34.4545
negative regulation of translation in response to stress (GO:0032055)	2	1	0.04	25	0.04	34.4545
regulation of histone phosphorylation (GO:0033127)	2	1	0.04	25	0.04	34.4545
regulation of translational initiation in response to stress (GO:0043558)	2	1	0.04	25	0.04	34.4545
negative regulation of SREBP signaling pathway (GO:2000639)	2	1	0.04	25	0.04	34.4545
mRNA splice site selection (GO:0006376)	2	1	0.04	25	0.04	34.4545
mRNA 5'-splice site recognition (GO:0000395)	2	1	0.04	25	0.04	34.4545
response to increased oxygen levels (GO:0036296)	2	1	0.04	25	0.04	34.4545
cellular response to increased oxygen levels (GO:0036295)	2	1	0.04	25	0.04	34.4545
RNA (guanine-N7)-methylation (GO:0036265)	2	1	0.04	25	0.04	34.4545
nuclear inner membrane organization (GO:0071765)	2	1	0.04	25	0.04	34.4545
nuclear membrane organization (GO:0071763)	2	1	0.04	25	0.04	34.4545
spliceosomal complex assembly (GO:0000245)	2	1	0.04	25	0.04	34.4545
negative regulation of SREBP signaling pathway by positive regulation of transcription factor catabolic process in response to increased oxygen levels (GO:1901487)	2	1	0.04	25	0.04	34.4545
negative regulation of SREBP signaling pathway by positive regulation of transcription factor catabolic process (GO:1901486)	2	1	0.04	25	0.04	34.4545
positive regulation of transcription factor catabolic process (GO:1901485)	2	1	0.04	25	0.04	34.4545
regulation of transcription factor catabolic process (GO:1901483)	2	1	0.04	25	0.04	34.4545
lactate biosynthetic process (GO:0019249)	2	1	0.04	25	0.04	34.4545
replication fork arrest (GO:0043111)	2	1	0.04	25	0.04	34.4545
proteasome localization (GO:0031144)	2	1	0.04	25	0.04	34.4545
NLS-bearing protein import into nucleus (GO:0006607)	2	1	0.04	25	0.04	34.4545
negative regulation of translational initiation (GO:0045947)	2	1	0.04	25	0.04	34.4545
negative regulation of SREBP signaling pathway in response to increased oxygen levels (GO:0038175)	2	1	0.04	25	0.04	34.4545
genetic imprinting at mating-type locus (GO:0071515)	2	1	0.04	25	0.04	34.4545
genetic imprinting (GO:0071514)	2	1	0.04	25	0.04	34.4545
response to hyperoxia (GO:0055093)	2	1	0.04	25	0.04	34.4545
regulation of ER to Golgi vesicle-mediated transport (GO:0060628)	2	1	0.04	25	0.04	34.4545
mRNA catabolic process (GO:0006402)	37	3	0.76	3.94737	0.0401	34.5407
protein complex localization (GO:0031503)	16	2	0.33	6.06061	0.0426	36.6941
cellular protein complex localization (GO:0034629)	16	2	0.33	6.06061	0.0426	36.6941
macromolecule catabolic process (GO:0009057)	159	7	3.24	2.16049	0.0427	36.7802
cellular response to stimulus (GO:0051716)	465	15	9.49	1.58061	0.0443	38.1584
nucleobase-containing compound catabolic process (GO:0034655)	66	4	1.35	2.96296	0.046	39.6227

## Sheet: GO cellular component
TableS3: Results of GO analysis of identified strains
GO cellular component complete	All gene deletions assessed (2989)	Signficant genes deletions (61)	Expected	Fold Enrichment	P-value	Corrected P-value (Bonferronni)
nuclear part (GO:0044428)	539	29	11	2.63636	1.3e-07	4.3e-05
macromolecular complex (GO:0032991)	843	36	17.2	2.09302	4.88e-07	0.000161415
nucleoplasm part (GO:0044451)	91	10	1.86	5.37634	1.49e-05	0.00492846
INO80-type complex (GO:0097346)	16	5	0.33	15.1515	2.04e-05	0.00674769
protein complex (GO:0043234)	608	27	12.41	2.17566	2.1e-05	0.00694615
nucleoplasm (GO:0005654)	100	10	2.04	4.90196	3.32e-05	0.0109815
Swr1 complex (GO:0000812)	10	4	0.2	20	5.61e-05	0.0185562
nuclear lumen (GO:0031981)	426	21	8.69	2.41657	6.27e-05	0.0207392
spliceosomal complex (GO:0005681)	23	5	0.47	10.6383	0.000112	0.0370462
SWI/SNF superfamily-type complex (GO:0070603)	25	5	0.51	9.80392	0.000165	0.0545769
cytoplasm (GO:0005737)	2402	37	49.02	0.754794	0.000304	0.100554
intracellular organelle lumen (GO:0070013)	479	21	9.78	2.14724	0.000339	0.112131
organelle lumen (GO:0043233)	479	21	9.78	2.14724	0.000339	0.112131
nuclear chromosome part (GO:0044454)	222	13	4.53	2.86976	0.000462	0.152815
membrane-enclosed lumen (GO:0031974)	492	21	10.04	2.09163	0.000491	0.162408
nucleus (GO:0005634)	1527	44	31.16	1.41207	0.000663	0.2193
nuclear chromosome (GO:0000228)	232	13	4.73	2.74841	0.0007	0.231538
U2-type spliceosomal complex (GO:0005684)	9	3	0.18	16.6667	0.000862	0.285123
chromosomal part (GO:0044427)	251	13	5.12	2.53906	0.00145	0.479615
organelle part (GO:0044422)	1146	35	23.39	1.49637	0.00198	0.654923
chromosome (GO:0005694)	261	13	5.33	2.43902	0.00205	0.678077
nuclear chromatin (GO:0000790)	174	10	3.55	2.8169	0.00261	0.863308
chromatin (GO:0000785)	174	10	3.55	2.8169	0.00261	0.863308
cytoplasmic part (GO:0044444)	2267	36	46.27	0.778042	0.00272	0.899692
mRNA cleavage factor complex (GO:0005849)	4	2	0.08	25	0.00311	1.02869
mRNA cleavage and polyadenylation specificity factor complex (GO:0005847)	4	2	0.08	25	0.00311	1.02869
intracellular organelle part (GO:0044446)	1134	34	23.14	1.46932	0.00357	1.18085
NuA4 histone acetyltransferase complex (GO:0035267)	5	2	0.1	20	0.0048	1.58769
nuclear envelope (GO:0005635)	79	6	1.61	3.72671	0.00546	1.806
H4/H2A histone acetyltransferase complex (GO:0043189)	6	2	0.12	16.6667	0.00682	2.25585
H4 histone acetyltransferase complex (GO:1902562)	6	2	0.12	16.6667	0.00682	2.25585
Ino80 complex (GO:0031011)	7	2	0.14	14.2857	0.00916	3.02985
DNA helicase complex (GO:0033202)	8	2	0.16	12.5	0.0118	3.90308
catalytic complex (GO:1902494)	185	9	3.78	2.38095	0.0124	4.10154
nuclear pore (GO:0005643)	27	3	0.55	5.45455	0.018	5.95385
pore complex (GO:0046930)	28	3	0.57	5.26316	0.0198	6.54923
catalytic step 2 spliceosome (GO:0071013)	1	1	0.02	50	0.0202	6.68154
DNA-directed RNA polymerase II, core complex (GO:0005665)	1	1	0.02	50	0.0202	6.68154
integral component of nuclear inner membrane (GO:0005639)	1	1	0.02	50	0.0202	6.68154
nuclear membrane part (GO:0044453)	1	1	0.02	50	0.0202	6.68154
replication fork protection complex (GO:0031298)	1	1	0.02	50	0.0202	6.68154
intrinsic component of nuclear inner membrane (GO:0031229)	1	1	0.02	50	0.0202	6.68154
trimeric positive transcription elongation factor complex b (GO:0070692)	1	1	0.02	50	0.0202	6.68154
nuclear mitotic cohesin complex (GO:0034990)	1	1	0.02	50	0.0202	6.68154
commitment complex (GO:0000243)	1	1	0.02	50	0.0202	6.68154
mitotic cohesin complex (GO:0030892)	1	1	0.02	50	0.0202	6.68154
MTREC complex (GO:1990345)	1	1	0.02	50	0.0202	6.68154
heterochromatin island (GO:1990342)	1	1	0.02	50	0.0202	6.68154
transcription elongation factor complex (GO:0008023)	12	2	0.24	8.33333	0.0252	8.33538
transferase complex (GO:1990234)	116	6	2.37	2.53165	0.0307	10.1546
ribonucleoprotein complex (GO:0030529)	184	8	3.76	2.12766	0.0329	10.8823
mitochondrion (GO:0005739)	388	3	7.92	0.378788	0.0353	11.6762
nuclear inner membrane (GO:0005637)	2	1	0.04	25	0.04	13.2308
nuclear body (GO:0016604)	2	1	0.04	25	0.04	13.2308
NURS complex (GO:1990477)	2	1	0.04	25	0.04	13.2308
Lid2 complex (GO:0048189)	2	1	0.04	25	0.04	13.2308
Mmi1 nuclear focus complex (GO:1990251)	2	1	0.04	25	0.04	13.2308
DPS complex (GO:1990567)	2	1	0.04	25	0.04	13.2308
ribonuclease H2 complex (GO:0032299)	2	1	0.04	25	0.04	13.2308
Rpd3L complex (GO:0033698)	2	1	0.04	25	0.04	13.2308
elongin complex (GO:0070449)	2	1	0.04	25	0.04	13.2308
TORC1 complex (GO:0031931)	2	1	0.04	25	0.04	13.2308
telomerase holoenzyme complex (GO:0005697)	2	1	0.04	25	0.04	13.2308
U1 snRNP (GO:0005685)	2	1	0.04	25	0.04	13.2308
Golgi apparatus (GO:0005794)	230	1	4.69	0.21322	0.046	15.2154
